# Supplementary material for: Landscape genomics of Escherichia coli in livestock-keeping households across a rapidly developing urban city
Source: Research Square preprint supplement (doi:10.21203/rs.3.rs-172737/v1), 2021-02-26
Supplement: Supplementary file 4 [file 3e3dc24f7e1d543246dccf20.csv]

sample_name	Plate	Project	SampleID	Source_id	Source_Level1	Source_Level2	Source_Level3	HHID	Date	Sublocation	Neigh_class	Wealth_group	Latitude	Longitude	Livestock_yn	ID	ST	EntBase_ST	Unique.ST	Beef_total_count	Dairy_total_count	Meat_goat_total_count	Dairy_goat_total_count	Sheep_total_count	Pig_total_count	Rabbit_total_count	Guinea_pigs_total	Indigenous_chicken_total	Layer_chickens_hens_total	Broiler_chickens_total	Ducks_total	Geese_total	Guinea_fowl_total	Turkeys_total	Pigeons_total	Egyptian_geese_total	Livestock_types	Notes	Accession
PLQ2204	Plate 15	P160810	UZ030753	KTS088HUM10	human	human	human	KTS088	05/09/2016	KITISURU	110	1	-1.232017083	36.75897979	yes	PLQ2204	216*	11092	Yes	0	4	0	0	0	0	0	0	7	5	0	6	7	0	0	0	0	ruminants birds	NA	ERS3415596 (SAMEA5611407)
TMP020703	Plate 10	P160554	UZ021930	KWG071HUM2	human	human	human	KWG071	05/07/2016	KAWANGWARE	260	6	-1.280645	36.74687667	yes	TMP020703	9652	9652	Yes	0	0	22	0	3	1	2	0	0	0	0	0	3	0	2	0	0	ruminants monogastrics birds	NA	ERS3415984 (SAMEA5611795)
TMP021005	Plate 14	P160720	UZ022070	GTN073AVN7	avian	w_avian	wildlife	GTN073	12/07/2016	GATINA	260	6	-1.27637736	36.75747462	yes	TMP021005	9651	9651	Yes	0	4	0	0	0	0	0	0	6	0	0	0	0	0	0	0	0	ruminants birds	NA	ERS3416029 (SAMEA5611840)
TMP020322	Plate 08	P160553	UZ029323	SPV065AVN2	avian	w_avian	wildlife	SPV065	06/06/2016	SPRING VALLEY	120	2	-1.257883333	36.78655833	no	TMP020322	9650	9650	Yes	0	0	0	0	0	0	0	0	0	0	0	0	0	0	0	0	0	none	NA	ERS3415957 (SAMEA5611768)
TMP020486	Plate 09	P160554	UZ029981	KWG070CAP3	goat	ruminant	livestock	KWG070	04/07/2016	KAWANGWARE	260	6	-1.278915	36.74525167	yes	TMP020486	9648	9648	Yes	0	1	22	0	25	0	0	0	0	0	0	0	0	0	0	0	0	ruminants	NA	ERS3415969 (SAMEA5611780)
TMP020499	Plate 10	P160554	UZ029987	KWG070CAP2	goat	ruminant	livestock	KWG070	04/07/2016	KAWANGWARE	260	6	-1.278915	36.74525167	yes	TMP020499	9648	9648	Yes	0	1	22	0	25	0	0	0	0	0	0	0	0	0	0	0	0	ruminants	NA	ERS3415971 (SAMEA5611782)
TMP020669	Plate 09	P160554	UZ029983	KWG070CAP4	goat	ruminant	livestock	KWG070	04/07/2016	KAWANGWARE	260	6	-1.278915	36.74525167	yes	TMP020669	9648	9648	Yes	0	1	22	0	25	0	0	0	0	0	0	0	0	0	0	0	0	ruminants	NA	ERS3415979 (SAMEA5611790)
TMP020787	Plate 14	P160720	UZ029425	KWG071AVN1	avian	w_avian	wildlife	KWG071	05/07/2016	KAWANGWARE	260	6	-1.280645	36.74687667	yes	TMP020787	9647	9647	Yes	0	0	22	0	3	1	2	0	0	0	0	0	3	0	2	0	0	ruminants monogastrics birds	NA	ERS3415996 (SAMEA5611807)
TMP020802	Plate 21	P170066	UZ027369	KWG070ROD1	rodent	w_mammal	wildlife	KWG070	04/07/2016	KAWANGWARE	260	6	-1.278915	36.74525167	yes	TMP020802	9646	9646	Yes	0	1	22	0	25	0	0	0	0	0	0	0	0	0	0	0	0	ruminants	NA	ERS3415998 (SAMEA5611809)
TMP019846	Plate 01	P160078	UZ026399	MLK023CAP1	goat	ruminant	livestock	MLK023	10/11/2015	MLANGO KUBWA	312	7	-1.264538333	36.85216167	yes	TMP019846	9642	9642	Yes	0	26	2	0	4	0	0	0	0	0	0	0	0	0	0	0	0	ruminants	NA	ERS3415923 (SAMEA5611734)
TMP019851	Plate 02	P160078	UZ026397	MLK023OVN1	sheep	ruminant	livestock	MLK023	10/11/2015	MLANGO KUBWA	312	7	-1.264538333	36.85216167	yes	TMP019851	9642	9642	Yes	0	26	2	0	4	0	0	0	0	0	0	0	0	0	0	0	0	ruminants	NA	ERS3415924 (SAMEA5611735)
TMP019424	Plate 02	P160078	UZ2004510	KIG019AVN5	avian	w_avian	wildlife	KIG019	02/11/2015	KIRIGU	260	6	-1.291726667	36.70118333	yes	TMP019424	9641	9641	Yes	0	0	16	0	0	2	0	0	5	0	0	0	0	0	0	0	0	ruminants monogastrics birds	NA	ERS3415873 (SAMEA5611684)
TMP019506	Plate 11	P160719	UZ026004	KIG020ROD1	rodent	w_mammal	wildlife	KIG020	03/11/2015	KIRIGU	260	6	-1.29399	36.704215	yes	TMP019506	9640	9640	Yes	0	3	2	0	0	0	0	0	3	0	0	0	0	0	0	0	0	ruminants birds	NA	ERS3415883 (SAMEA5611694)
TMP019584	Plate 12	P160719	UZ2004534	KIG020AVN12	avian	w_avian	wildlife	KIG020	03/11/2015	KIRIGU	260	6	-1.29399	36.704215	yes	TMP019584	9639	9639	Yes	0	3	2	0	0	0	0	0	3	0	0	0	0	0	0	0	0	ruminants birds	NA	ERS3415894 (SAMEA5611705)
TMP018526	Plate 07	P160553	UZ026658	KYL025CAP5	goat	ruminant	livestock	KYL025	16/11/2015	KAYOLE	313	6	-1.265657435	36.91767563	yes	TMP018526	9637*	9637	NA	0	1	14	0	0	0	0	0	0	0	0	2	0	0	0	0	0	ruminants birds	NA	ERS3415807 (SAMEA5611618)
TMP018687	Plate 15	P160810	UZ026403	MLK023BOV10	bovine	ruminant	livestock	MLK023	10/11/2015	MLANGO KUBWA	312	7	-1.264538333	36.85216167	yes	TMP018687	9636	9636	Yes	0	26	2	0	4	0	0	0	0	0	0	0	0	0	0	0	0	ruminants	NA	ERS3415812 (SAMEA5611623)
TMP018696	Plate 04	P160305	UZ026239	MLK023HUM1	human	human	human	MLK023	10/11/2015	MLANGO KUBWA	312	7	-1.264538333	36.85216167	yes	TMP018696	9635	9635	Yes	0	26	2	0	4	0	0	0	0	0	0	0	0	0	0	0	0	ruminants	NA	ERS3415813 (SAMEA5611624)
TMP019915	Plate 15	P160810	UZ026236	MLK023HUM5	human	human	human	MLK023	10/11/2015	MLANGO KUBWA	312	7	-1.264538333	36.85216167	yes	TMP019915	9635	9635	Yes	0	26	2	0	4	0	0	0	0	0	0	0	0	0	0	0	0	ruminants	NA	ERS3415932 (SAMEA5611743)
TMP018806	Plate 12	P160719	UZ026883	UTH029GAL9	chickens	poultry	livestock	UTH029	02/12/2015	UTHIRU	260	6	-1.259986667	36.70342	yes	TMP018806	9634	9634	Yes	0	0	0	6	0	0	0	0	115	0	0	0	0	0	0	0	0	ruminants birds	NA	ERS3415818 (SAMEA5611629)
TMP019021	Plate 16	P160810	UZ026404	MLK023BOV9	bovine	ruminant	livestock	MLK023	10/11/2015	MLANGO KUBWA	312	7	-1.264538333	36.85216167	yes	TMP019021	9633	9633	Yes	0	26	2	0	4	0	0	0	0	0	0	0	0	0	0	0	0	ruminants	NA	ERS3415827 (SAMEA5611638)
TMP019297	Plate 11	P160719	UZ025945	MAK017ROD1	rodent	w_mammal	wildlife	MAK017	27/10/2015	MAKONGENI	230	6	-1.298248333	36.84727333	yes	TMP019297	9631	9631	Yes	0	0	0	0	0	0	5	1	30	0	0	0	0	0	0	0	0	monogastrics birds	NA	ERS3415855 (SAMEA5611666)
TMP016843	Plate 12	P160719	UZ025375	KAN007AVN5	avian	w_avian	wildlife	KAN007	21/09/2015	KAREN	110	1	-1.360794419	36.71998186	yes	TMP016843	9630	9630	Yes	0	6	0	0	0	0	0	0	0	0	0	0	2	0	0	0	0	ruminants birds other	NA	ERS3415767 (SAMEA5611578)
TMP018305	Plate 07	P160553	UZ026593	KYL026SUI8	pig	monogastric	livestock	KYL026	24/11/2015	KAYOLE	313	6	-1.276371667	36.920625	yes	TMP018305	9628*	9628	Yes	0	0	0	0	0	14	0	0	40	0	0	0	0	0	0	0	0	monogastrics birds	NA	ERS3415793 (SAMEA5611604)
TMP016258	Plate 02	P160078	UZ025771	HAR011LAG10	rabbit	monogastric	livestock	HAR011	05/10/2015	HARAMBEE	211	3	-1.287711667	36.87792167	yes	TMP016258	9627	9627	Yes	0	0	0	0	0	0	40	0	0	0	0	0	0	0	0	0	0	monogastrics birds	NA	ERS3415715 (SAMEA5611526)
TMP016428	Plate 01	P160078	UZ025465	KAN007BAT4	bat	w_bat	wildlife	KAN007	21/09/2015	KAREN	110	1	-1.360794419	36.71998186	yes	TMP016428	9625	9625	Yes	0	6	0	0	0	0	0	0	0	0	0	0	2	0	0	0	0	ruminants birds other	NA	ERS3415736 (SAMEA5611547)
TMP015252	Plate 14	P160720	UZ025150	VIW001GAL6	chickens	poultry	livestock	VIW001	31/08/2015	VIWANDANI	312	7	-1.313058333	36.85866167	yes	TMP015252	9624	9624	Yes	0	0	0	4	0	0	0	0	200	0	0	0	0	5	0	0	0	ruminants birds	NA	ERS3415660 (SAMEA5611471)
TMP015566	Plate 08	P160553	UZ025198	VIW002CAP1	goat	ruminant	livestock	VIW002	01/09/2015	VIWANDANI	312	7	-1.309915	36.878755	yes	TMP015566	9623	9623	Yes	0	3	0	0	0	15	3	0	5	0	0	0	0	0	0	0	0	ruminants monogastrics birds	NA	ERS3415675 (SAMEA5611486)
TMP015846	Plate 04	P160305	UZ025187	VIW002GAL3	chickens	poultry	livestock	VIW002	01/09/2015	VIWANDANI	312	7	-1.309915	36.878755	yes	TMP015846	9622	9622	Yes	0	3	0	0	0	15	3	0	5	0	0	0	0	0	0	0	0	ruminants monogastrics birds	NA	ERS3415685 (SAMEA5611496)
PLQ000943	Plate 17	P160773	UZ035176	MUT084BAT3	bat	w_bat	wildlife	MUT084	17/08/2016	MUTHANGARI	110	2	-1.265065	36.78292	yes	PLQ000943	9619	9619	Yes	0	0	0	2	0	0	0	0	2	0	0	0	0	0	0	0	0	ruminants birds	NA	ERS3415578 (SAMEA5611389)
PLQ2237	Plate 15	P160810	UZ030509	KTS088GAL3	chickens	poultry	livestock	KTS088	05/09/2016	KITISURU	110	1	-1.232017083	36.75897979	yes	PLQ2237	9618	9618	Yes	0	4	0	0	0	0	0	0	7	5	0	6	7	0	0	0	0	ruminants birds	NA	ERS3415600 (SAMEA5611411)
PLQ2249	Plate 16	P160810	UZ030512	KTS088ANA3	geese	poultry	livestock	KTS088	05/09/2016	KITISURU	110	1	-1.232017083	36.75897979	yes	PLQ2249	9617	9617	Yes	0	4	0	0	0	0	0	0	7	5	0	6	7	0	0	0	0	ruminants birds	NA	ERS3415602 (SAMEA5611413)
PLQ2279	Plate 16	P160810	UZ030508	KTS088GAL2	chickens	poultry	livestock	KTS088	05/09/2016	KITISURU	110	1	-1.232017083	36.75897979	yes	PLQ2279	9616	9616	NA	0	4	0	0	0	0	0	0	7	5	0	6	7	0	0	0	0	ruminants birds	NA	ERS3415606 (SAMEA5611417)
PLQ2308	Plate 15	P160810	UZ030515	KTS088ANA4	ducks	poultry	livestock	KTS088	05/09/2016	KITISURU	110	1	-1.232017083	36.75897979	yes	PLQ2308	9615	9615	Yes	0	4	0	0	0	0	0	0	7	5	0	6	7	0	0	0	0	ruminants birds	NA	ERS3415611 (SAMEA5611422)
TMP015164	Plate 10	P160554	UZ025412	MSA004GAL1	chickens	poultry	livestock	MSA004	14/09/2015	MOWLEM = SAIKA	311	6	-1.245281667	36.92033333	yes	TMP015164	9614	9614	Yes	0	5	0	0	0	7	4	0	20	0	0	0	0	0	0	0	0	ruminants monogastrics birds other	NA	ERS3415653 (SAMEA5611464)
PLQ000566	Plate 13	P160720	UZ022137	NGN079BOV5	bovine	ruminant	livestock	NGN079	08/08/2016	NGUNDU	270	5	-1.268731667	37.06599	yes	PLQ000566	9613	9613	Yes	6	0	0	0	10	0	0	0	3	0	0	0	0	0	0	0	0	ruminants birds other	NA	ERS3415537 (SAMEA5611348)
PLQ000580	Plate 16	P160810	UZ022279	NGN079GAL3	chickens	poultry	livestock	NGN079	08/08/2016	NGUNDU	270	5	-1.268731667	37.06599	yes	PLQ000580	9612	9612	Yes	6	0	0	0	10	0	0	0	3	0	0	0	0	0	0	0	0	ruminants birds other	NA	ERS3415539 (SAMEA5611350)
PLQ000841	Plate 16	P160810	UZ022258	MUT082GAL2	chickens	poultry	livestock	MUT082	15/08/2016	MUTHANGARI	110	2	-1.2663	36.782315	yes	PLQ000841	9610	9610	Yes	0	2	0	1	0	0	3	0	13	0	0	0	0	0	0	0	0	ruminants monogastrics birds	NA	ERS3415566 (SAMEA5611377)
PLQ000969	Plate 18	P160773	UZ035129	MUT083AVN4	avian	w_avian	wildlife	MUT083	16/08/2016	MUTHANGARI	110	2	-1.263035	36.79185	no	PLQ000969	9609	9609	Yes	0	0	0	0	0	0	0	0	0	0	0	0	0	0	0	0	0	none	NA	ERS3415582 (SAMEA5611393)
PLQ000279	Plate 18	P160773	UZ035113	MUT084AVN3	avian	w_avian	wildlife	MUT084	17/08/2016	MUTHANGARI	110	2	-1.265065	36.78292	yes	PLQ000279	9608	9608	Yes	0	0	0	2	0	0	0	0	2	0	0	0	0	0	0	0	0	ruminants birds	NA	ERS3415514 (SAMEA5611325)
PLQ000461	Plate 16	P160810	UZ022273	GWK078GAL1	chickens	poultry	livestock	GWK078	25/07/2016	GATWIKIRA	312	7	-1.314113333	36.78104167	yes	PLQ000461	9607	9607	Yes	0	0	0	0	0	0	0	0	16	0	0	0	0	0	0	0	0	birds	NA	ERS3415520 (SAMEA5611331)
PLQ000484	Plate 16	P160810	UZ022269	GWK078GAL5	chickens	poultry	livestock	GWK078	25/07/2016	GATWIKIRA	312	7	-1.314113333	36.78104167	yes	PLQ000484	9606	9606	Yes	0	0	0	0	0	0	0	0	16	0	0	0	0	0	0	0	0	birds	NA	ERS3415524 (SAMEA5611335)
INT010071	Plate 17	P160773	UZ030642	SPV100COL2	pigeons	poultry	livestock	SPV100	05/10/2016	SPRING VALLEY	110	2	-1.254815	36.77469833	yes	INT010071	9604	9604	Yes	0	0	0	0	0	0	4	0	1	0	0	9	4	1	1	70	0	monogastrics birds	NA	ERS3415464 (SAMEA5611275)
INT007750	Plate 08	P160553	UZ028876	KOR059HUM1	human	human	human	KOR059	10/05/2016	NYAYO (KOROGOCHO)	312	7	-1.253945	36.88923667	yes	INT007750	9603	9603	Yes	0	0	0	0	0	10	0	0	0	0	0	0	0	0	0	0	0	monogastrics	NA	ERS3415391 (SAMEA5611202)
INT007916	Plate 07	P160553	UZ029152	KAS061SUI4	pig	monogastric	livestock	KAS061	16/05/2016	KASARANI	321	5	-1.223748333	36.92381333	yes	INT007916	9602	9602	Yes	0	0	3	0	0	10	0	0	9	0	0	0	0	0	0	0	0	ruminants monogastrics birds	NA	ERS3415414 (SAMEA5611225)
INT007465	Plate 07	P160553	UZ028591	MWK056HUM4	human	human	human	MWK056	03/05/2016	MWIKI	313	6	-1.231583333	36.93017333	yes	INT007465	9600	9600	Yes	0	0	4	0	0	10	0	0	0	0	0	7	0	0	0	0	0	ruminants monogastrics birds	NA	ERS3415352 (SAMEA5611162)
INT005961	Plate 06	P160465	UZ028325	LUM053HUM3	human	human	human	LUM053	12/04/2016	LUMUMBA (JERICHO)	220	6	-1.292383333	36.87426	yes	INT005961	9596	9596	Yes	0	0	0	0	0	0	0	0	15	0	0	0	0	0	0	0	0	birds	NA	ERS3415300 (SAMEA5611110)
INT007003	Plate 11	P160719	UZ029522	MIH067GAL5	chickens	poultry	livestock	MIH067	07/06/2016	MIHANGO	270	5	-1.273335	36.944275	yes	INT007003	9595	9595	Yes	0	3	0	0	0	0	0	0	30	0	0	0	0	11	0	0	0	ruminants birds	NA	ERS3415318 (SAMEA5611128)
INT007070	Plate 10	P160554	UZ028076	LUM054ROD5	rodent	w_mammal	wildlife	LUM054	13/04/2016	LUMUMBA (JERICHO)	220	6	-1.293103333	36.871635	yes	INT007070	9594	9594	Yes	0	0	44	0	0	0	0	0	5	0	0	12	0	0	0	0	0	ruminants birds	NA	ERS3415322 (SAMEA5611132)
INT005957	Plate 06	P160465	UZ028324	LUM053HUM2	human	human	human	LUM053	12/04/2016	LUMUMBA (JERICHO)	220	6	-1.292383333	36.87426	yes	INT005957	9593	9593	Yes	0	0	0	0	0	0	0	0	15	0	0	0	0	0	0	0	0	birds	NA	ERS3415299 (SAMEA5611109)
INT005501	Plate 10	P160554	UZ027380	KHW049ROD1	rodent	w_mammal	wildlife	KHW049	05/04/2016	KAHAWA WEST / JUJA K	311	6	-1.179655	36.90618833	yes	INT005501	9592	9592	Yes	0	5	0	0	0	0	0	0	18	0	0	0	0	0	0	0	0	ruminants birds	NA	ERS3415238 (SAMEA5611048)
PL015209	Plate 11	P160719	UZ025314	MBO014ROD4	rodent	w_mammal	wildlife	MBO014	12/10/2015	MBOTELA	240	5	-1.298803333	36.86333833	yes	PL015209	9592	9592	Yes	0	0	0	0	0	0	3	3	12	0	0	8	0	3	0	0	0	monogastrics birds	NA	ERS3415505 (SAMEA5611316)
PL015229	Plate 11	P160719	UZ2004473	MBO014ROD9	rodent	w_mammal	wildlife	MBO014	12/10/2015	MBOTELA	240	5	-1.298803333	36.86333833	yes	PL015229	9592	9592	Yes	0	0	0	0	0	0	3	3	12	0	0	8	0	3	0	0	0	monogastrics birds	NA	ERS3415506 (SAMEA5611317)
TMP020963	Plate 21	P170066	UZ027322	GTN074ROD1	rodent	w_mammal	wildlife	GTN074	13/07/2016	GATINA	260	6	-1.291341667	36.75221	yes	TMP020963	9592	9592	Yes	0	0	0	0	3	0	0	0	7	0	0	0	0	0	0	0	0	ruminants birds	NA	ERS3416023 (SAMEA5611834)
INT005706	Plate 06	P160465	UZ028172	KHW050HUM1	human	human	human	KHW050	06/04/2016	KAHAWA WEST / JUJA K	311	6	-1.179393235	36.90742073	yes	INT005706	9591	9591	Yes	0	0	4	11	0	0	0	0	20	0	0	0	14	4	5	0	0	ruminants birds	NA	ERS3415266 (SAMEA5611076)
INT005690	Plate 06	P160465	UZ028175	KHW050HUM4	human	human	human	KHW050	06/04/2016	KAHAWA WEST / JUJA K	311	6	-1.179393235	36.90742073	yes	INT005690	9590	9590	Yes	0	0	4	11	0	0	0	0	20	0	0	0	14	4	5	0	0	ruminants birds	NA	ERS3415265 (SAMEA5611075)
INT004783	Plate 06	P160465	UZ025731	KRR039HUM3	human	human	human	KRR039	22/02/2016	KARURA	120	2	-1.224276667	36.82658833	yes	INT004783	9583	9583	Yes	0	0	0	0	0	0	0	0	0	0	700	0	0	0	0	0	0	birds	NA	ERS3415143 (SAMEA5610953)
INT005034	Plate 05	P160465	UZ027558	KIL042CAP5	goat	ruminant	livestock	KIL042	09/03/2016	KILIMANI	130	2	-1.297515	36.78249167	yes	INT005034	9582	9582	Yes	0	0	6	0	0	0	0	0	6	0	0	0	0	0	0	0	0	ruminants birds	NA	ERS3415177 (SAMEA5610987)
INT005045	Plate 05	P160465	UZ027563	KIL042CAP4	goat	ruminant	livestock	KIL042	09/03/2016	KILIMANI	130	2	-1.297515	36.78249167	yes	INT005045	9582	9582	Yes	0	0	6	0	0	0	0	0	6	0	0	0	0	0	0	0	0	ruminants birds	NA	ERS3415179 (SAMEA5610989)
INT005103	Plate 06	P160465	UZ027683	EAS043GAL5	chickens	poultry	livestock	EAS043	14/03/2016	EASTLEIGH NORTH	330	5	-1.266996667	36.84912833	yes	INT005103	9581	9581	Yes	0	0	0	0	0	0	0	0	8	0	0	0	0	0	0	0	0	birds	NA	ERS3415186 (SAMEA5610996)
INT004897	Plate 05	P160465	UZ027498	KIL041NUM1	guinea_fowl	poultry	livestock	KIL041	08/03/2016	KILIMANI	110	2	-1.291786185	36.78376162	yes	INT004897	9580	9580	Yes	0	0	0	3	3	0	33	0	167	0	0	6	3	4	6	0	0	ruminants monogastrics birds	NA	ERS3415159 (SAMEA5610969)
INT004996	Plate 07	P160553	UZ027571	KIL042GAL1	chickens	poultry	livestock	KIL042	09/03/2016	KILIMANI	130	2	-1.297515	36.78249167	yes	INT004996	9578	9578	Yes	0	0	6	0	0	0	0	0	6	0	0	0	0	0	0	0	0	ruminants birds	NA	ERS3415171 (SAMEA5610981)
TWAG1821	Plate 17	P160773	UZ022213	BOM091HUM5	human	human	human	BOM091	13/09/2016	BOMAS	211	3	-1.320306667	36.78094667	yes	TWAG1821	9566	9566	NA	0	0	0	0	0	0	2	0	15	0	0	0	2	3	2	0	3	monogastrics birds	NA	ERS3416275 (SAMEA5612087)
TWAG1862	Plate 18	P160773	UZ030851	BOM092CAP1	goat	ruminant	livestock	BOM092	14/09/2016	BOMAS	211	3	-1.323251667	36.77964333	yes	TWAG1862	9564	9564	Yes	0	0	13	0	0	0	0	0	10	0	0	0	0	0	0	0	0	ruminants birds	NA	ERS3416282 (SAMEA5612094)
PL015203	Plate 11	P160719	UZ2004492	MBO014ROD5	rodent	w_mammal	wildlife	MBO014	12/10/2015	MBOTELA	240	5	-1.298803333	36.86333833	yes	PL015203	9563	9563	Yes	0	0	0	0	0	0	3	3	12	0	0	8	0	3	0	0	0	monogastrics birds	NA	ERS3415504 (SAMEA5611315)
TWAG1958	Plate 17	P160773	UZ030891	MGM094HUM2	human	human	human	MGM094	19/09/2016	MUGUMOINI	212	4	-1.326458333	36.78585167	yes	TWAG1958	9562	9562	NA	0	0	0	0	0	0	0	0	3	0	0	0	0	0	0	0	0	birds	NA	ERS3416298 (SAMEA5612110)
TWAG00211	Plate 08	P160553	UZ029551	MIH068HUM4	human	human	human	MIH068	08/06/2016	MIHANGO	270	5	-1.267946667	36.94829	yes	TWAG00211	9561	9561	Yes	0	0	0	0	0	0	6	0	7	0	0	0	0	0	0	0	0	monogastrics birds	NA	ERS3416231 (SAMEA5612043)
TWAG00263	Plate 10	P160554	UZ029618	MIH068GAL2	chickens	poultry	livestock	MIH068	08/06/2016	MIHANGO	270	5	-1.267946667	36.94829	yes	TWAG00263	9560	9560	Yes	0	0	0	0	0	0	6	0	7	0	0	0	0	0	0	0	0	monogastrics birds	NA	ERS3416237 (SAMEA5612049)
TWAG1754	Plate 17	P160773	UZ030655	BOM091LAG1	rabbit	monogastric	livestock	BOM091	13/09/2016	BOMAS	211	3	-1.320306667	36.78094667	yes	TWAG1754	9559	9559	Yes	0	0	0	0	0	0	2	0	15	0	0	0	2	3	2	0	3	monogastrics birds	NA	ERS3416265 (SAMEA5612077)
TWAG1761	Plate 17	P160773	UZ030582	BOM091GAL2	chickens	poultry	livestock	BOM091	13/09/2016	BOMAS	211	3	-1.320306667	36.78094667	yes	TWAG1761	9559	9559	Yes	0	0	0	0	0	0	2	0	15	0	0	0	2	3	2	0	3	monogastrics birds	NA	ERS3416266 (SAMEA5612078)
TWAG1788	Plate 18	P160773	UZ030652	BOM091NUM1	guinea_fowl	poultry	livestock	BOM091	13/09/2016	BOMAS	211	3	-1.320306667	36.78094667	yes	TWAG1788	9558	9558	Yes	0	0	0	0	0	0	2	0	15	0	0	0	2	3	2	0	3	monogastrics birds	NA	ERS3416270 (SAMEA5612082)
TMP023983	Plate 19	P160812	UZ031064	LOR097NUM2	guinea_fowl	poultry	livestock	LOR097	27/09/2016	LORESHO	110	1	-1.247168333	36.764595	yes	TMP023983	9557	9557	Yes	0	0	0	0	0	0	0	0	13	0	0	0	0	16	0	0	0	birds	NA	ERS3416170 (SAMEA5611982)
TMP024029	Plate 19	P160812	UZ030948	LOR097HUM6	human	human	human	LOR097	27/09/2016	LORESHO	110	1	-1.247168333	36.764595	yes	TMP024029	9556	9556	Yes	0	0	0	0	0	0	0	0	13	0	0	0	0	16	0	0	0	birds	NA	ERS3416178 (SAMEA5611990)
PLQ000710	Plate 21	P170066	UZ035065	NGN080AVN13	avian	w_avian	wildlife	NGN080	09/08/2016	NGUNDU	270	5	-1.27306	37.05743667	yes	PLQ000710	9555	9555	Yes	0	0	4	0	3	0	0	0	115	0	0	4	0	0	0	0	0	ruminants birds	NA	ERS3415560 (SAMEA5611371)
TMP024156	Plate 19	P160812	UZ031289	LOR098GAL1	chickens	poultry	livestock	LOR098	28/09/2016	LORESHO	120	1	-1.24741938	36.7508106	yes	TMP024156	9554	9554	Yes	0	0	3	0	1	0	0	0	21	14	0	2	0	0	0	0	0	ruminants birds	NA	ERS3416197 (SAMEA5612009)
TMP024164	Plate 19	P160812	UZ031296	LOR098ANA2	ducks	poultry	livestock	LOR098	28/09/2016	LORESHO	120	1	-1.24741938	36.7508106	yes	TMP024164	9553	9553	Yes	0	0	3	0	1	0	0	0	21	14	0	2	0	0	0	0	0	ruminants birds	NA	ERS3416198 (SAMEA5612010)
TMP024175	Plate 19	P160812	UZ031342	LOR098GAL5	chickens	poultry	livestock	LOR098	28/09/2016	LORESHO	120	1	-1.24741938	36.7508106	yes	TMP024175	9552	9552	Yes	0	0	3	0	1	0	0	0	21	14	0	2	0	0	0	0	0	ruminants birds	NA	ERS3416200 (SAMEA5612012)
TMP024200	Plate 17	P160773	UZ035310	LOR098AVN7	avian	w_avian	wildlife	LOR098	28/09/2016	LORESHO	120	1	-1.24741938	36.7508106	yes	TMP024200	9551	9551	Yes	0	0	3	0	1	0	0	0	21	14	0	2	0	0	0	0	0	ruminants birds	NA	ERS3416202 (SAMEA5612014)
TMP022799	Plate 13	P160720	UZ022176	NGN080ANA1	ducks	poultry	livestock	NGN080	09/08/2016	NGUNDU	270	5	-1.27306	37.05743667	yes	TMP022799	9550	9550	Yes	0	0	4	0	3	0	0	0	115	0	0	4	0	0	0	0	0	ruminants birds	NA	ERS3416127 (SAMEA5611939)
TMP023848	Plate 19	P160812	UZ022220	MGM095HUM1	human	human	human	MGM095	20/09/2016	MUGUMOINI	212	4	-1.32085454	36.7856738	no	TMP023848	9549	9549	Yes	0	0	0	0	0	0	0	0	0	0	0	0	0	0	0	0	0	none	NA	ERS3416150 (SAMEA5611962)
TMP023935	Plate 18	P160773	UZ030345	LOR098CNV1	carnivore	w_mammal	wildlife	LOR098	28/09/2016	LORESHO	120	1	-1.24741938	36.7508106	yes	TMP023935	9548	9548	Yes	0	0	3	0	1	0	0	0	21	14	0	2	0	0	0	0	0	ruminants birds	NA	ERS3416162 (SAMEA5611974)
TMP023941	Plate 19	P160812	UZ031050	LOR097GAL2	chickens	poultry	livestock	LOR097	27/09/2016	LORESHO	110	1	-1.247168333	36.764595	yes	TMP023941	9547	9547	NA	0	0	0	0	0	0	0	0	13	0	0	0	0	16	0	0	0	birds	NA	ERS3416163 (SAMEA5611975)
TMP021433	Plate 10	P160554	UZ027394	KHW050AVN4	avian	w_avian	wildlife	KHW050	06/04/2016	KAHAWA WEST / JUJA K	311	6	-1.179393235	36.90742073	yes	TMP021433	9545	9545	Yes	0	0	4	11	0	0	0	0	20	0	0	0	14	4	5	0	0	ruminants birds	NA	ERS3416077 (SAMEA5611888)
TMP021569	Plate 12	P160719	UZ028231	LUM053GAL7	chickens	poultry	livestock	LUM053	12/04/2016	LUMUMBA (JERICHO)	220	6	-1.292383333	36.87426	yes	TMP021569	9544	9544	Yes	0	0	0	0	0	0	0	0	15	0	0	0	0	0	0	0	0	birds	NA	ERS3416083 (SAMEA5611894)
TMP020950	Plate 16	P160810	UZ022081	GTN073BOV2	bovine	ruminant	livestock	GTN073	12/07/2016	GATINA	260	6	-1.27637736	36.75747462	yes	TMP020950	9543	9543	Yes	0	4	0	0	0	0	0	0	6	0	0	0	0	0	0	0	0	ruminants birds	NA	ERS3416021 (SAMEA5611832)
TMP019950	Plate 02	P160078	UZ026414	MLK023BOV6	bovine	ruminant	livestock	MLK023	10/11/2015	MLANGO KUBWA	312	7	-1.264538333	36.85216167	yes	TMP019950	9542	9542	Yes	0	26	2	0	4	0	0	0	0	0	0	0	0	0	0	0	0	ruminants	NA	ERS3415937 (SAMEA5611748)
TWAG1716	Plate 18	P160773	UZ030363	BOM091AVN1	avian	w_avian	wildlife	BOM091	13/09/2016	BOMAS	211	3	-1.320306667	36.78094667	yes	TWAG1716	9542	9542	Yes	0	0	0	0	0	0	2	0	15	0	0	0	2	3	2	0	3	monogastrics birds	NA	ERS3416259 (SAMEA5612071)
INT005621	Plate 05	P160465	UZ028151	KHW049BOV3	bovine	ruminant	livestock	KHW049	05/04/2016	KAHAWA WEST / JUJA K	311	6	-1.179655	36.90618833	yes	INT005621	9541	9541	Yes	0	5	0	0	0	0	0	0	18	0	0	0	0	0	0	0	0	ruminants birds	NA	ERS3415255 (SAMEA5611065)
TMP019524	Plate 03	P160305	UZ026266	KIG020BOV3	bovine	ruminant	livestock	KIG020	03/11/2015	KIRIGU	260	6	-1.29399	36.704215	yes	TMP019524	9541	9541	Yes	0	3	2	0	0	0	0	0	3	0	0	0	0	0	0	0	0	ruminants birds	NA	ERS3415886 (SAMEA5611697)
TMP021809	Plate 09	P160554	UZ028150	KHW049BOV2	bovine	ruminant	livestock	KHW049	05/04/2016	KAHAWA WEST / JUJA K	311	6	-1.179655	36.90618833	yes	TMP021809	9541	9541	Yes	0	5	0	0	0	0	0	0	18	0	0	0	0	0	0	0	0	ruminants birds	NA	ERS3416101 (SAMEA5611912)
TMP019627	Plate 03	P160305	UZ026225	KIG020HUM1	human	human	human	KIG020	03/11/2015	KIRIGU	260	6	-1.29399	36.704215	yes	TMP019627	9540	9540	Yes	0	3	2	0	0	0	0	0	3	0	0	0	0	0	0	0	0	ruminants birds	NA	ERS3415900 (SAMEA5611711)
TMP018555	Plate 08	P160553	UZ026661	KYL025CAP8	goat	ruminant	livestock	KYL025	16/11/2015	KAYOLE	313	6	-1.265657435	36.91767563	yes	TMP018555	9539	9539	Yes	0	1	14	0	0	0	0	0	0	0	0	2	0	0	0	0	0	ruminants birds	NA	ERS3415808 (SAMEA5611619)
TMP019092	Plate 01	P160078	UZ026069	MAK017GAL1	chickens	poultry	livestock	MAK017	27/10/2015	MAKONGENI	230	6	-1.298248333	36.84727333	yes	TMP019092	9538	9538	Yes	0	0	0	0	0	0	5	1	30	0	0	0	0	0	0	0	0	monogastrics birds	NA	ERS3415830 (SAMEA5611641)
TMP016868	Plate 01	P160078	UZ025605	KAN007BOV4	bovine	ruminant	livestock	KAN007	21/09/2015	KAREN	110	1	-1.360794419	36.71998186	yes	TMP016868	9537	9537	Yes	0	6	0	0	0	0	0	0	0	0	0	0	2	0	0	0	0	ruminants birds other	NA	ERS3415770 (SAMEA5611581)
PLQ000735	Plate 17	P160773	UZ035150	NGN080ROD3	rodent	w_mammal	wildlife	NGN080	09/08/2016	NGUNDU	270	5	-1.27306	37.05743667	yes	PLQ000735	9536	9536	Yes	0	0	4	0	3	0	0	0	115	0	0	4	0	0	0	0	0	ruminants birds	NA	ERS3415564 (SAMEA5611375)
TMP016572	Plate 02	P160078	UZ025246	MSA004GAL4	chickens	poultry	livestock	MSA004	14/09/2015	MOWLEM = SAIKA	311	6	-1.245281667	36.92033333	yes	TMP016572	9536	9536	Yes	0	5	0	0	0	7	4	0	20	0	0	0	0	0	0	0	0	ruminants monogastrics birds other	NA	ERS3415751 (SAMEA5611562)
TMP016409	Plate 02	P160078	UZ025620	KAN007HUM2	human	human	human	KAN007	21/09/2015	KAREN	110	1	-1.360794419	36.71998186	yes	TMP016409	9535	9535	Yes	0	6	0	0	0	0	0	0	0	0	0	0	2	0	0	0	0	ruminants birds other	NA	ERS3415734 (SAMEA5611545)
TMP016193	Plate 01	P160078	UZ025560	MSA006GAL4	chickens	poultry	livestock	MSA006	15/09/2015	MOWLEM = SAIKA	313	6	-1.256981667	36.90746667	yes	TMP016193	9534	9534	Yes	0	0	0	0	0	0	0	0	15	0	0	0	0	0	0	0	0	birds other	NA	ERS3415707 (SAMEA5611518)
TMP015509	Plate 08	P160553	UZ025269	VIW002SUI5	pig	monogastric	livestock	VIW002	01/09/2015	VIWANDANI	312	7	-1.309915	36.878755	yes	TMP015509	9532	9532	Yes	0	3	0	0	0	15	3	0	5	0	0	0	0	0	0	0	0	ruminants monogastrics birds	NA	ERS3415671 (SAMEA5611482)
TMP015505	Plate 14	P160720	UZ025273	VIW002SUI2	pig	monogastric	livestock	VIW002	01/09/2015	VIWANDANI	312	7	-1.309915	36.878755	yes	TMP015505	9531	9531	Yes	0	3	0	0	0	15	3	0	5	0	0	0	0	0	0	0	0	ruminants monogastrics birds	NA	ERS3415670 (SAMEA5611481)
PLQ000474	Plate 19	P160812	UZ022270	GWK078GAL3	chickens	poultry	livestock	GWK078	25/07/2016	GATWIKIRA	312	7	-1.314113333	36.78104167	yes	PLQ000474	9528	9528	NA	0	0	0	0	0	0	0	0	16	0	0	0	0	0	0	0	0	birds	NA	ERS3415522 (SAMEA5611333)
INT007553	Plate 07	P160553	UZ028740	MWK057GAL1	chickens	poultry	livestock	MWK057	05/05/2016	MWIKI	313	6	-1.229788913	36.92984478	yes	INT007553	9526	9526	Yes	0	0	4	0	0	11	0	0	4	0	0	16	0	0	0	0	0	ruminants monogastrics birds	NA	ERS3415364 (SAMEA5611175)
INT006502	Plate 14	P160720	UZ029583	MIH069HUM2	human	human	human	MIH069	13/06/2016	MIHANGO	270	5	-1.273078333	36.95491	no	INT006502	9525	9525	NA	0	0	0	0	0	0	0	0	0	0	0	0	0	0	0	0	0	none	NA	ERS3415315 (SAMEA5611125)
INT004775	Plate 06	P160465	UZ027269	KRR039HUM2	human	human	human	KRR039	22/02/2016	KARURA	120	2	-1.224276667	36.82658833	yes	INT004775	9523	9523	Yes	0	0	0	0	0	0	0	0	0	0	700	0	0	0	0	0	0	birds	NA	ERS3415142 (SAMEA5610952)
INT005081	Plate 05	P160465	UZ027580	KIL042GAL4	chickens	poultry	livestock	KIL042	09/03/2016	KILIMANI	130	2	-1.297515	36.78249167	yes	INT005081	9522	9522	Yes	0	0	6	0	0	0	0	0	6	0	0	0	0	0	0	0	0	ruminants birds	NA	ERS3415182 (SAMEA5610992)
INT004203	Plate 03	P160305	UZ026974	DAN031GAL2	chickens	poultry	livestock	DAN031	11/01/2016	DANDORA 'B'	313	6	-1.241636667	36.90821167	yes	INT004203	9520	9520	Yes	0	9	0	0	0	0	0	0	13	0	0	0	0	0	0	0	0	ruminants birds	NA	ERS3415060 (SAMEA5610870)
INT004212	Plate 10	P160554	UZ026303	DAN033ROD1	rodent	w_mammal	wildlife	DAN033	13/01/2016	DANDORA 'B'	313	6	-1.241171667	36.910715	no	INT004212	9519	9519	Yes	0	0	0	0	0	0	0	0	0	0	0	0	0	0	0	0	0	none	NA	ERS3415062 (SAMEA5610872)
INT004240	Plate 10	P160554	UZ2004731	DAN031AVN3	avian	w_avian	wildlife	DAN031	11/01/2016	DANDORA 'B'	313	6	-1.241636667	36.90821167	yes	INT004240	9518	9518	Yes	0	9	0	0	0	0	0	0	13	0	0	0	0	0	0	0	0	ruminants birds	NA	ERS3415065 (SAMEA5610875)
INT004284	Plate 10	P160554	UZ026304	DAN031ROD1	rodent	w_mammal	wildlife	DAN031	11/01/2016	DANDORA 'B'	313	6	-1.241636667	36.90821167	yes	INT004284	9517	9517	Yes	0	9	0	0	0	0	0	0	13	0	0	0	0	0	0	0	0	ruminants birds	NA	ERS3415073 (SAMEA5610883)
INT004612	Plate 05	P160465	UZ027136	UMJ036CAP1	goat	ruminant	livestock	UMJ036	27/01/2016	UMOJA	212	4	-1.278311667	36.88803	yes	INT004612	9516	9516	Yes	0	0	5	0	0	0	28	0	24	0	0	0	0	0	3	0	0	ruminants monogastrics birds	NA	ERS3415121 (SAMEA5610931)
INT004489	Plate 08	P160553	UZ027089	UMJ035GAL4	chickens	poultry	livestock	UMJ035	26/01/2016	UMOJA	212	4	-1.282928333	36.88523333	yes	INT004489	9515	9515	Yes	0	0	0	0	0	0	0	0	15	0	0	0	0	0	0	0	0	birds	NA	ERS3415102 (SAMEA5610912)
INT004507	Plate 05	P160465	UZ2004659	UMJ035AVN4	avian	w_avian	wildlife	UMJ035	26/01/2016	UMOJA	212	4	-1.282928333	36.88523333	yes	INT004507	9514	9514	Yes	0	0	0	0	0	0	0	0	15	0	0	0	0	0	0	0	0	birds	NA	ERS3415105 (SAMEA5610915)
INT004370	Plate 10	P160554	UZ2004755	DANDUMPAV_POP6	av_pop	w_avian	wildlife	DANDUMP	NA	NA	NA	NA	NA	NA	NA	INT004370	9513	9513	Yes	NA	NA	NA	NA	NA	NA	NA	NA	NA	NA	NA	NA	NA	NA	NA	NA	NA	NA	NA	ERS3415084 (SAMEA5610894)
INT004297	Plate 05	P160465	UZ027014	DAN032GAL2	chickens	poultry	livestock	DAN032	12/01/2016	DANDORA 'B'	313	6	-1.24761043	36.90650254	yes	INT004297	9512	9512	Yes	0	0	0	0	0	0	0	0	53	0	0	0	0	0	0	0	0	birds	NA	ERS3415074 (SAMEA5610884)
INT003875	Plate 10	P160554	UZ027011	DAN032GAL6	chickens	poultry	livestock	DAN032	12/01/2016	DANDORA 'B'	313	6	-1.24761043	36.90650254	yes	INT003875	9507	9507	Yes	0	0	0	0	0	0	0	0	53	0	0	0	0	0	0	0	0	birds	NA	ERS3415044 (SAMEA5610854)
INT003892	Plate 11	P160719	UZ027012	DAN032GAL5	chickens	poultry	livestock	DAN032	12/01/2016	DANDORA 'B'	313	6	-1.24761043	36.90650254	yes	INT003892	9507	9507	Yes	0	0	0	0	0	0	0	0	53	0	0	0	0	0	0	0	0	birds	NA	ERS3415046 (SAMEA5610856)
INT004717	Plate 06	P160465	UZ027220	KRR037BOV4	bovine	ruminant	livestock	KRR037	09/02/2016	KARURA	120	2	-1.215838333	36.8016	yes	INT004717	9506	9506	Yes	0	5	0	0	0	0	0	0	6	250	0	0	0	0	0	0	0	ruminants birds	NA	ERS3415134 (SAMEA5610944)
INT003135	Plate 12	P160719	UZ027229	KRR037HUM3	human	human	human	KRR037	09/02/2016	KARURA	120	2	-1.215838333	36.8016	yes	INT003135	9505	9505	Yes	0	5	0	0	0	0	0	0	6	250	0	0	0	0	0	0	0	ruminants birds	NA	ERS3415012 (SAMEA5610822)
INT003331	Plate 03	P160305	UZ2004715	DAN031AVN10	avian	w_avian	wildlife	DAN031	11/01/2016	DANDORA 'B'	313	6	-1.241636667	36.90821167	yes	INT003331	9504	9504	Yes	0	9	0	0	0	0	0	0	13	0	0	0	0	0	0	0	0	ruminants birds	NA	ERS3415023 (SAMEA5610833)
INT003766	Plate 10	P160554	UZ027514	KIL041OVN1	sheep	ruminant	livestock	KIL041	08/03/2016	KILIMANI	110	2	-1.291786185	36.78376162	yes	INT003766	9503	9503	Yes	0	0	0	3	3	0	33	0	167	0	0	6	3	4	6	0	0	ruminants monogastrics birds	NA	ERS3415040 (SAMEA5610850)
INT000343	Plate 21	P170066	UZ025372	MSA006AVN3	avian	w_avian	wildlife	MSA006	15/09/2015	MOWLEM = SAIKA	313	6	-1.256981667	36.90746667	yes	INT000343	9499	9499	Yes	0	0	0	0	0	0	0	0	15	0	0	0	0	0	0	0	0	birds other	NA	ERS3414993 (SAMEA5610803)
INT000485	Plate 01	P160078	UZ025658	KAN008GAL5	chickens	poultry	livestock	KAN008	22/09/2015	KAREN	110	1	-1.338961667	36.70231333	yes	INT000485	9498	9498	Yes	0	0	0	0	0	0	0	0	140	0	0	0	0	0	0	0	0	birds	NA	ERS3415003 (SAMEA5610813)
ALQ034833	Plate 12	P160719	UZ030467	EMB087GAL4	chickens	poultry	livestock	EMB087	24/08/2016	EMBAKASI	211	4	-1.310101667	36.89491333	yes	ALQ034833	9481	9481	Yes	0	0	0	0	0	0	6	0	20	0	0	0	0	0	0	0	0	monogastrics birds	NA	ERS3414964 (SAMEA5610774)
INT008582	Plate 18	P160773	UZ030466	EMB087LAG2	rabbit	monogastric	livestock	EMB087	24/08/2016	EMBAKASI	211	4	-1.310101667	36.89491333	yes	INT008582	9481	9481	Yes	0	0	0	0	0	0	6	0	20	0	0	0	0	0	0	0	0	monogastrics birds	NA	ERS3415432 (SAMEA5611243)
ALQ034837	Plate 11	P160719	UZ030463	EMB087GAL1	chickens	poultry	livestock	EMB087	24/08/2016	EMBAKASI	211	4	-1.310101667	36.89491333	yes	ALQ034837	9480	9480	Yes	0	0	0	0	0	0	6	0	20	0	0	0	0	0	0	0	0	monogastrics birds	NA	ERS3414965 (SAMEA5610775)
ALQ034825	Plate 21	P170066	UZ035191	EMB087ROD4	rodent	w_mammal	wildlife	EMB087	24/08/2016	EMBAKASI	211	4	-1.310101667	36.89491333	yes	ALQ034825	9479	9479	Yes	0	0	0	0	0	0	6	0	20	0	0	0	0	0	0	0	0	monogastrics birds	NA	ERS3414963 (SAMEA5610773)
ALQ034852	Plate 17	P160773	UZ035197	EMB087ROD5	rodent	w_mammal	wildlife	EMB087	24/08/2016	EMBAKASI	211	4	-1.310101667	36.89491333	yes	ALQ034852	9479	9479	Yes	0	0	0	0	0	0	6	0	20	0	0	0	0	0	0	0	0	monogastrics birds	NA	ERS3414967 (SAMEA5610777)
TWAG00315	Plate 10	P160554	UZ029365	MIH068ROD2	rodent	w_mammal	wildlife	MIH068	08/06/2016	MIHANGO	270	5	-1.267946667	36.94829	yes	TWAG00315	9479	9479	Yes	0	0	0	0	0	0	6	0	7	0	0	0	0	0	0	0	0	monogastrics birds	NA	ERS3416242 (SAMEA5612054)
ALQ035097	Plate 18	P160773	UZ031254	LOR098GAL4	chickens	poultry	livestock	LOR098	28/09/2016	LORESHO	120	1	-1.24741938	36.7508106	yes	ALQ035097	9478	9478	Yes	0	0	3	0	1	0	0	0	21	14	0	2	0	0	0	0	0	ruminants birds	NA	ERS3414981 (SAMEA5610791)
ALQ034629	Plate 11	P160719	UZ030186	EMB085COL6	pigeons	poultry	livestock	EMB085	22/08/2016	EMBAKASI	211	4	-1.311076667	36.89346167	yes	ALQ034629	9465	9465	Yes	0	0	0	0	0	0	0	0	300	0	0	0	0	0	0	26	0	birds	NA	ERS3414943 (SAMEA5610753)
ALQ034713	Plate 21	P170066	UZ035100	EMB085AVN5	avian	w_avian	wildlife	EMB085	22/08/2016	EMBAKASI	211	4	-1.311076667	36.89346167	yes	ALQ034713	9464	9464	Yes	0	0	0	0	0	0	0	0	300	0	0	0	0	0	0	26	0	birds	NA	ERS3414953 (SAMEA5610763)
ALQ034765	Plate 18	P160773	UZ030288	EMB087ROD2	rodent	w_mammal	wildlife	EMB087	24/08/2016	EMBAKASI	211	4	-1.310101667	36.89491333	yes	ALQ034765	9463*	9463	Yes	0	0	0	0	0	0	6	0	20	0	0	0	0	0	0	0	0	monogastrics birds	NA	ERS3414958 (SAMEA5610768)
ALQ028402	Plate 12	P160719	UZ028900	KOR060HUM3	human	human	human	KOR060	11/05/2016	NYAYO (KOROGOCHO)	312	7	-1.251918333	36.89265167	no	ALQ028402	9460	9460	Yes	0	0	0	0	0	0	0	0	0	0	0	0	0	0	0	0	0	none	NA	ERS3414908 (SAMEA5610718)
TMP020434	Plate 07	P160553	UZ029596	MIH067GAL2	chickens	poultry	livestock	MIH067	07/06/2016	MIHANGO	270	5	-1.273335	36.944275	yes	TMP020434	9459	9459	NA	0	3	0	0	0	0	0	0	30	0	0	0	0	11	0	0	0	ruminants birds	NA	ERS3415964 (SAMEA5611775)
ALQ032666	Plate 16	P160810	UZ030122	MUT082HUM1	human	human	human	MUT082	15/08/2016	MUTHANGARI	110	2	-1.2663	36.782315	yes	ALQ032666	9458	9458	Yes	0	2	0	1	0	0	3	0	13	0	0	0	0	0	0	0	0	ruminants monogastrics birds	NA	ERS3414924 (SAMEA5610734)
TMP018674	Plate 15	P160810	UZ026390	MLK023BOV7	bovine	ruminant	livestock	MLK023	10/11/2015	MLANGO KUBWA	312	7	-1.264538333	36.85216167	yes	TMP018674	9456	9456	Yes	0	26	2	0	4	0	0	0	0	0	0	0	0	0	0	0	0	ruminants	NA	ERS3415811 (SAMEA5611622)
ALQ023299	Plate 07	P160553	UZ029259	SPV064HUM5	human	human	human	SPV064	23/05/2016	SPRING VALLEY	110	2	-1.253818333	36.790205	yes	ALQ023299	9454	9454	Yes	0	1	0	3	5	0	6	0	4	0	0	0	3	0	1	0	0	ruminants monogastrics birds	NA	ERS3414879 (SAMEA5610689)
INT006051	Plate 13	P160720	UZ029291	SPV064LAG1	rabbit	monogastric	livestock	SPV064	23/05/2016	SPRING VALLEY	110	2	-1.253818333	36.790205	yes	INT006051	9454	9454	Yes	0	1	0	3	5	0	6	0	4	0	0	0	3	0	1	0	0	ruminants monogastrics birds	NA	ERS3415304 (SAMEA5611114)
INT006147	Plate 19	P160812	UZ029158	SPV064MEL1	turkeys	poultry	livestock	SPV064	23/05/2016	SPRING VALLEY	110	2	-1.253818333	36.790205	yes	INT006147	9454	9454	Yes	0	1	0	3	5	0	6	0	4	0	0	0	3	0	1	0	0	ruminants monogastrics birds	NA	ERS3415306 (SAMEA5611116)
ALQ028080	Plate 12	P160719	UZ028381	LUM054HUM1	human	human	human	LUM054	13/04/2016	LUMUMBA (JERICHO)	220	6	-1.293103333	36.871635	yes	ALQ028080	9452	9452	Yes	0	0	44	0	0	0	0	0	5	0	0	12	0	0	0	0	0	ruminants birds	NA	ERS3414892 (SAMEA5610702)
ALQ028148	Plate 12	P160719	UZ028339	LUM054CAP4	goat	ruminant	livestock	LUM054	13/04/2016	LUMUMBA (JERICHO)	220	6	-1.293103333	36.871635	yes	ALQ028148	9451	9451	Yes	0	0	44	0	0	0	0	0	5	0	0	12	0	0	0	0	0	ruminants birds	NA	ERS3414897 (SAMEA5610707)
ALQ028258	Plate 16	P160810	UZ028762	KOR058GAL1	chickens	poultry	livestock	KOR058	09/05/2016	NYAYO (KOROGOCHO)	312	7	-1.25093	36.88799667	yes	ALQ028258	9449	9449	Yes	0	0	17	0	1	0	0	0	20	0	0	3	0	0	0	0	0	ruminants birds	NA	ERS3414902 (SAMEA5610712)
ALQ020217	Plate 03	P160305	UZ026876	UTH029CAP3	goat	ruminant	livestock	UTH029	02/12/2015	UTHIRU	260	6	-1.259986667	36.70342	yes	ALQ020217	9448	9448	Yes	0	0	0	6	0	0	0	0	115	0	0	0	0	0	0	0	0	ruminants birds	NA	ERS3414837 (SAMEA5610647)
ALQ023128	Plate 07	P160553	UZ029274	KAS063HUM3	human	human	human	KAS063	18/05/2016	KASARANI	321	5	-1.22741664	36.92116014	yes	ALQ023128	9447	9447	Yes	0	0	0	5	0	0	0	0	5	0	0	0	0	0	0	0	0	ruminants birds	NA	ERS3414856 (SAMEA5610666)
ALQ023222	Plate 08	P160553	UZ028684	SPV064ROD1	rodent	w_mammal	wildlife	SPV064	23/05/2016	SPRING VALLEY	110	2	-1.253818333	36.790205	yes	ALQ023222	9446	9446	Yes	0	1	0	3	5	0	6	0	4	0	0	0	3	0	1	0	0	ruminants monogastrics birds	NA	ERS3414868 (SAMEA5610678)
ALQ020101	Plate 03	P160305	UZ026449	UTH028BOV6	bovine	ruminant	livestock	UTH028	30/11/2015	UTHIRU	260	6	-1.263931667	36.70259	yes	ALQ020101	9445	9445	Yes	0	7	0	0	0	0	0	0	0	0	0	0	0	0	0	0	0	ruminants	NA	ERS3414820 (SAMEA5610630)
ALQ020107	Plate 04	P160305	UZ026469	UTH028BOV3	bovine	ruminant	livestock	UTH028	30/11/2015	UTHIRU	260	6	-1.263931667	36.70259	yes	ALQ020107	9444	9444	Yes	0	7	0	0	0	0	0	0	0	0	0	0	0	0	0	0	0	ruminants	NA	ERS3414821 (SAMEA5610631)
ALQ019809	Plate 04	P160305	UZ026910	UTH029GAL2	chickens	poultry	livestock	UTH029	02/12/2015	UTHIRU	260	6	-1.259986667	36.70342	yes	ALQ019809	9443	9443	Yes	0	0	0	6	0	0	0	0	115	0	0	0	0	0	0	0	0	ruminants birds	NA	ERS3414778 (SAMEA5610588)
INT003295	Plate 12	P160719	UZ027499	KIL041NUM2	guinea_fowl	poultry	livestock	KIL041	08/03/2016	KILIMANI	110	2	-1.291786185	36.78376162	yes	INT003295	9443	9443	Yes	0	0	0	3	3	0	33	0	167	0	0	6	3	4	6	0	0	ruminants monogastrics birds	NA	ERS3415020 (SAMEA5610830)
INT005286	Plate 05	P160465	UZ2004894	STC046AVN1	avian	w_avian	wildlife	STC046	22/03/2016	SOUTH C	211	3	-1.325046667	36.81989167	yes	INT005286	9443	9443	Yes	0	0	0	0	0	0	0	0	9	0	0	0	0	0	0	0	0	birds	NA	ERS3415210 (SAMEA5611020)
ALQ019866	Plate 03	P160305	UZ026778	KYL026GAL6	chickens	poultry	livestock	KYL026	24/11/2015	KAYOLE	313	6	-1.276371667	36.920625	yes	ALQ019866	9442	9442	Yes	0	0	0	0	0	14	0	0	40	0	0	0	0	0	0	0	0	monogastrics birds	NA	ERS3414788 (SAMEA5610598)
ALQ020424	Plate 09	P160554	UZ026722	UTH029ROD3	rodent	w_mammal	wildlife	UTH029	02/12/2015	UTHIRU	260	6	-1.259986667	36.70342	yes	ALQ020424	9442	9442	Yes	0	0	0	6	0	0	0	0	115	0	0	0	0	0	0	0	0	ruminants birds	NA	ERS3414844 (SAMEA5610654)
TMP019948	Plate 11	P160719	UZ025967	MLK023ROD3	rodent	w_mammal	wildlife	MLK023	10/11/2015	MLANGO KUBWA	312	7	-1.264538333	36.85216167	yes	TMP019948	9442	9442	Yes	0	26	2	0	4	0	0	0	0	0	0	0	0	0	0	0	0	ruminants	NA	ERS3415936 (SAMEA5611747)
ALQ019883	Plate 12	P160719	UZ025988	KYL026ROD1	rodent	w_mammal	wildlife	KYL026	24/11/2015	KAYOLE	313	6	-1.276371667	36.920625	yes	ALQ019883	9441	9441	Yes	0	0	0	0	0	14	0	0	40	0	0	0	0	0	0	0	0	monogastrics birds	NA	ERS3414791 (SAMEA5610601)
INT004621	Plate 09	P160554	UZ026340	UMJ034ROD1	rodent	w_mammal	wildlife	UMJ034	25/01/2016	UMOJA	212	4	-1.287877775	36.88810325	no	INT004621	9441	9441	Yes	0	0	0	0	0	0	0	0	0	0	0	0	0	0	0	0	0	none	NA	ERS3415122 (SAMEA5610932)
INT005243	Plate 09	P160554	UZ027474	EAS045ROD2	rodent	w_mammal	wildlife	EAS045	16/03/2016	EASTLEIGH NORTH	330	5	-1.26705	36.84652833	no	INT005243	9441	9441	Yes	0	0	0	0	0	0	0	0	0	0	0	0	0	0	0	0	0	none	NA	ERS3415205 (SAMEA5611015)
INT005550	Plate 09	P160554	UZ027385	KHW050ROD1	rodent	w_mammal	wildlife	KHW050	06/04/2016	KAHAWA WEST / JUJA K	311	6	-1.179393235	36.90742073	yes	INT005550	9441	9441	Yes	0	0	4	11	0	0	0	0	20	0	0	0	14	4	5	0	0	ruminants birds	NA	ERS3415243 (SAMEA5611053)
PL015200	Plate 12	P160719	UZ025308	MBO014ROD2	rodent	w_mammal	wildlife	MBO014	12/10/2015	MBOTELA	240	5	-1.298803333	36.86333833	yes	PL015200	9441	9441	Yes	0	0	0	0	0	0	3	3	12	0	0	8	0	3	0	0	0	monogastrics birds	NA	ERS3415503 (SAMEA5611314)
PL015264	Plate 09	P160554	UZ025320	MBO014ROD3	rodent	w_mammal	wildlife	MBO014	12/10/2015	MBOTELA	240	5	-1.298803333	36.86333833	yes	PL015264	9441	9441	Yes	0	0	0	0	0	0	3	3	12	0	0	8	0	3	0	0	0	monogastrics birds	NA	ERS3415509 (SAMEA5611320)
PL015278	Plate 10	P160554	UZ025938	MBO013ROD3	rodent	w_mammal	wildlife	MBO013	13/10/2015	MBOTELA	240	5	-1.298876667	36.86243	yes	PL015278	9441	9441	Yes	0	0	7	0	0	0	0	0	0	0	0	0	0	0	0	0	0	ruminants	NA	ERS3415511 (SAMEA5611322)
PL015286	Plate 09	P160554	UZ2004474	MBO014ROD8	rodent	w_mammal	wildlife	MBO014	12/10/2015	MBOTELA	240	5	-1.298803333	36.86333833	yes	PL015286	9441	9441	Yes	0	0	0	0	0	0	3	3	12	0	0	8	0	3	0	0	0	monogastrics birds	NA	ERS3415512 (SAMEA5611323)
TMP015013	Plate 17	P160773	UZ025277	VIWxxxROD1	rodent	w_mammal	wildlife	VIWxxx	NA	NA	NA	NA	NA	NA	NA	TMP015013	9441	9441	Yes	NA	NA	NA	NA	NA	NA	NA	NA	NA	NA	NA	NA	NA	NA	NA	NA	NA	NA	NA	ERS3415641 (SAMEA5611452)
TMP015072	Plate 18	P160773	UZ025284	VIWxxxROD5	rodent	w_mammal	wildlife	VIWxxx	NA	NA	NA	NA	NA	NA	NA	TMP015072	9441	9441	Yes	NA	NA	NA	NA	NA	NA	NA	NA	NA	NA	NA	NA	NA	NA	NA	NA	NA	NA	NA	ERS3415642 (SAMEA5611453)
TMP016229	Plate 22	P170066	UZ025295	MSA006ROD1	rodent	w_mammal	wildlife	MSA006	15/09/2015	MOWLEM = SAIKA	313	6	-1.256981667	36.90746667	yes	TMP016229	9441	9441	Yes	0	0	0	0	0	0	0	0	15	0	0	0	0	0	0	0	0	birds other	NA	ERS3415712 (SAMEA5611523)
TMP018318	Plate 03	P160305	UZ2004608	KYL026AVN4	avian	w_avian	wildlife	KYL026	24/11/2015	KAYOLE	313	6	-1.276371667	36.920625	yes	TMP018318	9441	9441	Yes	0	0	0	0	0	14	0	0	40	0	0	0	0	0	0	0	0	monogastrics birds	NA	ERS3415795 (SAMEA5611606)
TMP019555	Plate 17	P160773	UZ025953	KIG019ROD1	rodent	w_mammal	wildlife	KIG019	02/11/2015	KIRIGU	260	6	-1.291726667	36.70118333	yes	TMP019555	9441	9441	Yes	0	0	16	0	0	2	0	0	5	0	0	0	0	0	0	0	0	ruminants monogastrics birds	NA	ERS3415891 (SAMEA5611702)
TWAG1848	Plate 17	P160773	UZ035236	BOM092ROD1	rodent	w_mammal	wildlife	BOM092	14/09/2016	BOMAS	211	3	-1.323251667	36.77964333	yes	TWAG1848	9441	9441	Yes	0	0	13	0	0	0	0	0	10	0	0	0	0	0	0	0	0	ruminants birds	NA	ERS3416280 (SAMEA5612092)
TWAG1910	Plate 17	P160773	UZ035233	BOM092ROD2	rodent	w_mammal	wildlife	BOM092	14/09/2016	BOMAS	211	3	-1.323251667	36.77964333	yes	TWAG1910	9441	9441	Yes	0	0	13	0	0	0	0	0	10	0	0	0	0	0	0	0	0	ruminants birds	NA	ERS3416290 (SAMEA5612102)
ALQ019897	Plate 11	P160719	UZ026759	KYL026AVN5	avian	w_avian	wildlife	KYL026	24/11/2015	KAYOLE	313	6	-1.276371667	36.920625	yes	ALQ019897	9440	9440	Yes	0	0	0	0	0	14	0	0	40	0	0	0	0	0	0	0	0	monogastrics birds	NA	ERS3414792 (SAMEA5610602)
ALQ019966	Plate 12	P160719	UZ025986	KYL026ROD3	rodent	w_mammal	wildlife	KYL026	24/11/2015	KAYOLE	313	6	-1.276371667	36.920625	yes	ALQ019966	9439	9439	NA	0	0	0	0	0	14	0	0	40	0	0	0	0	0	0	0	0	monogastrics birds	NA	ERS3414801 (SAMEA5610611)
ALQ019728	Plate 04	P160305	UZ2004574	KYL025AVN1	avian	w_avian	wildlife	KYL025	16/11/2015	KAYOLE	313	6	-1.265657435	36.91767563	yes	ALQ019728	9438	9438	Yes	0	1	14	0	0	0	0	0	0	0	0	2	0	0	0	0	0	ruminants birds	NA	ERS3414769 (SAMEA5610579)
ALQ019622	Plate 03	P160305	UZ026643	KYL025CAP1	goat	ruminant	livestock	KYL025	16/11/2015	KAYOLE	313	6	-1.265657435	36.91767563	yes	ALQ019622	9436	9436	Yes	0	1	14	0	0	0	0	0	0	0	0	2	0	0	0	0	0	ruminants birds	NA	ERS3414757 (SAMEA5610567)
ALQ018914	Plate 08	P160553	UZ026051	MAK017GAL6	chickens	poultry	livestock	MAK017	27/10/2015	MAKONGENI	230	6	-1.298248333	36.84727333	yes	ALQ018914	9434	9434	Yes	0	0	0	0	0	0	5	1	30	0	0	0	0	0	0	0	0	monogastrics birds	NA	ERS3414715 (SAMEA5610525)
ALQ019107	Plate 03	P160305	UZ026065	MAK017GAL9	chickens	poultry	livestock	MAK017	27/10/2015	MAKONGENI	230	6	-1.298248333	36.84727333	yes	ALQ019107	9434	9434	Yes	0	0	0	0	0	0	5	1	30	0	0	0	0	0	0	0	0	monogastrics birds	NA	ERS3414726 (SAMEA5610536)
ALQ019365	Plate 08	P160553	UZ026180	KIG019CAP1	goat	ruminant	livestock	KIG019	02/11/2015	KIRIGU	260	6	-1.291726667	36.70118333	yes	ALQ019365	9433	9433	Yes	0	0	16	0	0	2	0	0	5	0	0	0	0	0	0	0	0	ruminants monogastrics birds	NA	ERS3414732 (SAMEA5610542)
TMP019339	Plate 01	P160078	UZ026108	KIG019CAP8	goat	ruminant	livestock	KIG019	02/11/2015	KIRIGU	260	6	-1.291726667	36.70118333	yes	TMP019339	9433	9433	Yes	0	0	16	0	0	2	0	0	5	0	0	0	0	0	0	0	0	ruminants monogastrics birds	NA	ERS3415861 (SAMEA5611672)
ALQ019499	Plate 01	P160078	UZ026522	MLK024GAL1	chickens	poultry	livestock	MLK024	11/11/2015	MLANGO KUBWA	312	7	-1.26418	36.85309167	yes	ALQ019499	9432	9432	Yes	0	0	0	0	0	0	0	0	8	0	0	7	0	0	0	0	0	birds	NA	ERS3414742 (SAMEA5610552)
INT005938	Plate 06	P160465	UZ028294	LUM053GAL2	chickens	poultry	livestock	LUM053	12/04/2016	LUMUMBA (JERICHO)	220	6	-1.292383333	36.87426	yes	INT005938	9432	9432	Yes	0	0	0	0	0	0	0	0	15	0	0	0	0	0	0	0	0	birds	NA	ERS3415296 (SAMEA5611106)
ALQ019529	Plate 11	P160719	UZ2004584	MLK023AVN3	avian	w_avian	wildlife	MLK023	10/11/2015	MLANGO KUBWA	312	7	-1.264538333	36.85216167	yes	ALQ019529	9431	9431	Yes	0	26	2	0	4	0	0	0	0	0	0	0	0	0	0	0	0	ruminants	NA	ERS3414746 (SAMEA5610556)
ALQ018686	Plate 02	P160078	UZ025854	MBO014ANA5	ducks	poultry	livestock	MBO014	12/10/2015	MBOTELA	240	5	-1.298803333	36.86333833	yes	ALQ018686	9430	9430	Yes	0	0	0	0	0	0	3	3	12	0	0	8	0	3	0	0	0	monogastrics birds	NA	ERS3414705 (SAMEA5610515)
ALQ018965	Plate 03	P160305	UZ026093	MAK017LAG4	rabbit	monogastric	livestock	MAK017	27/10/2015	MAKONGENI	230	6	-1.298248333	36.84727333	yes	ALQ018965	9429	9429	Yes	0	0	0	0	0	0	5	1	30	0	0	0	0	0	0	0	0	monogastrics birds	NA	ERS3414719 (SAMEA5610529)
ALQ017135	Plate 16	P160810	UZ2004451	HAR012AVN7	avian	w_avian	wildlife	HAR012	07/10/2015	HARAMBEE	211	3	-1.282213333	36.88126167	no	ALQ017135	9421	9421	Yes	0	0	0	0	0	0	0	0	0	0	0	0	0	0	0	0	0	none	NA	ERS3414670 (SAMEA5610480)
ALQ017249	Plate 04	P160305	UZ025444	HAR011AVN1	avian	w_avian	wildlife	HAR011	05/10/2015	HARAMBEE	211	3	-1.287711667	36.87792167	yes	ALQ017249	9420	9420	Yes	0	0	0	0	0	0	40	0	0	0	0	0	0	0	0	0	0	monogastrics birds	NA	ERS3414679 (SAMEA5610489)
ALQ023166	Plate 07	P160553	UZ027609	KAS063CAP4	goat	ruminant	livestock	KAS063	18/05/2016	KASARANI	321	5	-1.22741664	36.92116014	yes	ALQ023166	8984	8984	NA	0	0	0	5	0	0	0	0	5	0	0	0	0	0	0	0	0	ruminants birds	NA	ERS3414860 (SAMEA5610670)
INT007575	Plate 08	P160553	UZ028718	MWK057AVN10	avian	w_avian	wildlife	MWK057	05/05/2016	MWIKI	313	6	-1.229788913	36.92984478	yes	INT007575	8938	8938	NA	0	0	4	0	0	11	0	0	4	0	0	16	0	0	0	0	0	ruminants monogastrics birds	NA	ERS3415368 (SAMEA5611179)
TMP021480	Plate 12	P160719	UZ028217	KHW050NUM3	guinea_fowl	poultry	livestock	KHW050	06/04/2016	KAHAWA WEST / JUJA K	311	6	-1.179393235	36.90742073	yes	TMP021480	8823	8823	NA	0	0	4	11	0	0	0	0	20	0	0	0	14	4	5	0	0	ruminants birds	NA	ERS3416080 (SAMEA5611891)
TWAG1985	Plate 18	P160773	UZ022237	MGM094HUM1	human	human	human	MGM094	19/09/2016	MUGUMOINI	212	4	-1.326458333	36.78585167	yes	TWAG1985	8818	8818	NA	0	0	0	0	0	0	0	0	3	0	0	0	0	0	0	0	0	birds	NA	ERS3416303 (SAMEA5612115)
INT007844	Plate 15	P160810	UZ028646	KOR059AVN2	avian	w_avian	wildlife	KOR059	10/05/2016	NYAYO (KOROGOCHO)	312	7	-1.253945	36.88923667	yes	INT007844	8777	8777	NA	0	0	0	0	0	10	0	0	0	0	0	0	0	0	0	0	0	monogastrics	NA	ERS3415404 (SAMEA5611215)
TMP020987	Plate 14	P160720	UZ022067	GTN073AVN9	avian	w_avian	wildlife	GTN073	12/07/2016	GATINA	260	6	-1.27637736	36.75747462	yes	TMP020987	8764	8764	NA	0	4	0	0	0	0	0	0	6	0	0	0	0	0	0	0	0	ruminants birds	NA	ERS3416026 (SAMEA5611837)
PLQ000681	Plate 14	P160720	UZ022151	NGN080CAP3	goat	ruminant	livestock	NGN080	09/08/2016	NGUNDU	270	5	-1.27306	37.05743667	yes	PLQ000681	8650	8650	NA	0	0	4	0	3	0	0	0	115	0	0	4	0	0	0	0	0	ruminants birds	NA	ERS3415555 (SAMEA5611366)
TMP015532	Plate 07	P160553	UZ025200	VIW002CAP2	goat	ruminant	livestock	VIW002	01/09/2015	VIWANDANI	312	7	-1.309915	36.878755	yes	TMP015532	8650	8650	NA	0	3	0	0	0	15	3	0	5	0	0	0	0	0	0	0	0	ruminants monogastrics birds	NA	ERS3415673 (SAMEA5611484)
INT004819	Plate 06	P160465	UZ2004810	KRR038BT_POP5	bat_pop	w_bat	wildlife	KRR038	15/02/2016	KARURA	120	2	-1.216581667	36.79006167	no	INT004819	8576	8576	NA	0	0	0	0	0	0	0	0	0	0	0	0	0	0	0	0	0	none	NA	ERS3415148 (SAMEA5610958)
PLQ000602	Plate 16	P160810	UZ022278	NGN079BOV4	bovine	ruminant	livestock	NGN079	08/08/2016	NGUNDU	270	5	-1.268731667	37.06599	yes	PLQ000602	8564	8564	NA	6	0	0	0	10	0	0	0	3	0	0	0	0	0	0	0	0	ruminants birds other	NA	ERS3415543 (SAMEA5611354)
TMP018474	Plate 21	P170066	UZ025975	KYLxxxROD2	rodent	w_mammal	wildlife	KYLxxx	NA	NA	NA	NA	NA	NA	NA	TMP018474	8369	8369	NA	NA	NA	NA	NA	NA	NA	NA	NA	NA	NA	NA	NA	NA	NA	NA	NA	NA	NA	NA	ERS3415804 (SAMEA5611615)
TMP019785	Plate 02	P160078	UZ026431	MLK023HUM2	human	human	human	MLK023	10/11/2015	MLANGO KUBWA	312	7	-1.264538333	36.85216167	yes	TMP019785	8369	8369	NA	0	26	2	0	4	0	0	0	0	0	0	0	0	0	0	0	0	ruminants	NA	ERS3415914 (SAMEA5611725)
TMP022142	Plate 09	P160554	UZ027475	EAS045ROD1	rodent	w_mammal	wildlife	EAS045	16/03/2016	EASTLEIGH NORTH	330	5	-1.26705	36.84652833	no	TMP022142	8369	8369	NA	0	0	0	0	0	0	0	0	0	0	0	0	0	0	0	0	0	none	NA	ERS3416112 (SAMEA5611924)
TMP022209	Plate 21	P170066	UZ027472	EAS045ROD3	rodent	w_mammal	wildlife	EAS045	16/03/2016	EASTLEIGH NORTH	330	5	-1.26705	36.84652833	no	TMP022209	8369	8369	NA	0	0	0	0	0	0	0	0	0	0	0	0	0	0	0	0	0	none	NA	ERS3416113 (SAMEA5611925)
TMP019342	Plate 11	P160719	UZ2004521	KIG019AVN3	avian	w_avian	wildlife	KIG019	02/11/2015	KIRIGU	260	6	-1.291726667	36.70118333	yes	TMP019342	8324	8324	NA	0	0	16	0	0	2	0	0	5	0	0	0	0	0	0	0	0	ruminants monogastrics birds	NA	ERS3415862 (SAMEA5611673)
INT007420	Plate 08	P160553	UZ028605	MWK056CAP3	goat	ruminant	livestock	MWK056	03/05/2016	MWIKI	313	6	-1.231583333	36.93017333	yes	INT007420	8273	8273	NA	0	0	4	0	0	10	0	0	0	0	0	7	0	0	0	0	0	ruminants monogastrics birds	NA	ERS3415345 (SAMEA5611155)
TMP019355	Plate 01	P160078	UZ2004514	KIG019AVN6	avian	w_avian	wildlife	KIG019	02/11/2015	KIRIGU	260	6	-1.291726667	36.70118333	yes	TMP019355	8184	8184	NA	0	0	16	0	0	2	0	0	5	0	0	0	0	0	0	0	0	ruminants monogastrics birds	NA	ERS3415864 (SAMEA5611675)
ALQ019961	Plate 15	P160810	UZ025985	KYL026ROD4	rodent	w_mammal	wildlife	KYL026	24/11/2015	KAYOLE	313	6	-1.276371667	36.920625	yes	ALQ019961	8149	8149	NA	0	0	0	0	0	14	0	0	40	0	0	0	0	0	0	0	0	monogastrics birds	NA	ERS3414800 (SAMEA5610610)
ALQ019476	Plate 12	P160719	UZ025995	MLK024ROD1	rodent	w_mammal	wildlife	MLK024	11/11/2015	MLANGO KUBWA	312	7	-1.26418	36.85309167	yes	ALQ019476	7809	7809	NA	0	0	0	0	0	0	0	0	8	0	0	7	0	0	0	0	0	birds	NA	ERS3414738 (SAMEA5610548)
PLQ000934	Plate 17	P160773	UZ035130	MUT083AVN11	avian	w_avian	wildlife	MUT083	16/08/2016	MUTHANGARI	110	2	-1.263035	36.79185	no	PLQ000934	7798	7798	NA	0	0	0	0	0	0	0	0	0	0	0	0	0	0	0	0	0	none	NA	ERS3415576 (SAMEA5611387)
TMP021013	Plate 16	P160810	UZ022096	GTN075HUM3	human	human	human	GTN075	13/07/2016	GATINA	260	6	-1.275552495	36.75860432	no	TMP021013	7615	7615	NA	0	0	0	0	0	0	0	0	0	0	0	0	0	0	0	0	0	none	NA	ERS3416030 (SAMEA5611841)
TMP024178	Plate 19	P160812	UZ031292	LOR098GAL6	chickens	poultry	livestock	LOR098	28/09/2016	LORESHO	120	1	-1.24741938	36.7508106	yes	TMP024178	7611	7611	NA	0	0	3	0	1	0	0	0	21	14	0	2	0	0	0	0	0	ruminants birds	NA	ERS3416201 (SAMEA5612013)
TMP020456	Plate 07	P160553	UZ029598	MIH067GAL3	chickens	poultry	livestock	MIH067	07/06/2016	MIHANGO	270	5	-1.273335	36.944275	yes	TMP020456	7588	7588	NA	0	3	0	0	0	0	0	0	30	0	0	0	0	11	0	0	0	ruminants birds	NA	ERS3415968 (SAMEA5611779)
PL015152	Plate 11	P160719	UZ2004476	MBO015AVN7	avian	w_avian	wildlife	MBO015	13/10/2015	MBOTELA	240	5	-1.29833	36.85970667	no	PL015152	7473	7473	NA	0	0	0	0	0	0	0	0	0	0	0	0	0	0	0	0	0	none	NA	ERS3415499 (SAMEA5611310)
INT007583	Plate 07	P160553	UZ028716	MWK057AVN11	avian	w_avian	wildlife	MWK057	05/05/2016	MWIKI	313	6	-1.229788913	36.92984478	yes	INT007583	7428	7428	NA	0	0	4	0	0	11	0	0	4	0	0	16	0	0	0	0	0	ruminants monogastrics birds	NA	ERS3415369 (SAMEA5611180)
TMP019942	Plate 11	P160719	UZ2004555	MLK024AVN1	avian	w_avian	wildlife	MLK024	11/11/2015	MLANGO KUBWA	312	7	-1.26418	36.85309167	yes	TMP019942	7395	7395	NA	0	0	0	0	0	0	0	0	8	0	0	7	0	0	0	0	0	birds	NA	ERS3415935 (SAMEA5611746)
INT004316	Plate 11	P160719	UZ026330	DAN031ROD2	rodent	w_mammal	wildlife	DAN031	11/01/2016	DANDORA 'B'	313	6	-1.241636667	36.90821167	yes	INT004316	7366	7366	NA	0	9	0	0	0	0	0	0	13	0	0	0	0	0	0	0	0	ruminants birds	NA	ERS3415076 (SAMEA5610886)
TWAG1784	Plate 17	P160773	UZ030581	BOM091NUM2	guinea_fowl	poultry	livestock	BOM091	13/09/2016	BOMAS	211	3	-1.320306667	36.78094667	yes	TWAG1784	7329	7329	NA	0	0	0	0	0	0	2	0	15	0	0	0	2	3	2	0	3	monogastrics birds	NA	ERS3416269 (SAMEA5612081)
ALQ020462	Plate 03	P160305	UZ026877	UTH029CAP1	goat	ruminant	livestock	UTH029	02/12/2015	UTHIRU	260	6	-1.259986667	36.70342	yes	ALQ020462	7324	7324	NA	0	0	0	6	0	0	0	0	115	0	0	0	0	0	0	0	0	ruminants birds	NA	ERS3414850 (SAMEA5610660)
INT010077	Plate 17	P160773	UZ030688	SPV100LAG2	rabbit	monogastric	livestock	SPV100	05/10/2016	SPRING VALLEY	110	2	-1.254815	36.77469833	yes	INT010077	7324	7324	NA	0	0	0	0	0	0	4	0	1	0	0	9	4	1	1	70	0	monogastrics birds	NA	ERS3415465 (SAMEA5611276)
TMP018983	Plate 09	P160554	UZ026892	UTH029GAL5	chickens	poultry	livestock	UTH029	02/12/2015	UTHIRU	260	6	-1.259986667	36.70342	yes	TMP018983	7317	7317	Yes	0	0	0	6	0	0	0	0	115	0	0	0	0	0	0	0	0	ruminants birds	NA	ERS3415826 (SAMEA5611637)
ALQ023291	Plate 07	P160553	UZ028835	SPV064ANA1	geese	poultry	livestock	SPV064	23/05/2016	SPRING VALLEY	110	2	-1.253818333	36.790205	yes	ALQ023291	7285	7285	NA	0	1	0	3	5	0	6	0	4	0	0	0	3	0	1	0	0	ruminants monogastrics birds	NA	ERS3414878 (SAMEA5610688)
TMP021422	Plate 19	P160812	UZ028221	KHW050MEL2	turkeys	poultry	livestock	KHW050	06/04/2016	KAHAWA WEST / JUJA K	311	6	-1.179393235	36.90742073	yes	TMP021422	7184	7184	NA	0	0	4	11	0	0	0	0	20	0	0	0	14	4	5	0	0	ruminants birds	NA	ERS3416076 (SAMEA5611887)
TMP019125	Plate 01	P160078	UZ026109	MAK018HUM1	human	human	human	MAK018	27/10/2015	MAKONGENI	230	6	-1.296248	36.851973	no	TMP019125	7174	7174	NA	0	0	0	0	0	0	0	0	0	0	0	0	0	0	0	0	0	none	NA	ERS3415834 (SAMEA5611645)
TMP019129	Plate 11	P160719	UZ026038	MAK017AVN3	avian	w_avian	wildlife	MAK017	27/10/2015	MAKONGENI	230	6	-1.298248333	36.84727333	yes	TMP019129	7122	7122	NA	0	0	0	0	0	0	5	1	30	0	0	0	0	0	0	0	0	monogastrics birds	NA	ERS3415835 (SAMEA5611646)
PLQ000698	Plate 21	P170066	UZ035066	NGN080AVN12	avian	w_avian	wildlife	NGN080	09/08/2016	NGUNDU	270	5	-1.27306	37.05743667	yes	PLQ000698	7116	7116	NA	0	0	4	0	3	0	0	0	115	0	0	4	0	0	0	0	0	ruminants birds	NA	ERS3415558 (SAMEA5611369)
TMP016267	Plate 02	P160078	UZ025775	HAR011LAG2	rabbit	monogastric	livestock	HAR011	05/10/2015	HARAMBEE	211	3	-1.287711667	36.87792167	yes	TMP016267	7116	7116	NA	0	0	0	0	0	0	40	0	0	0	0	0	0	0	0	0	0	monogastrics birds	NA	ERS3415716 (SAMEA5611527)
TMP016939	Plate 11	P160719	UZ2004452	HAR012AVN8	avian	w_avian	wildlife	HAR012	07/10/2015	HARAMBEE	211	3	-1.282213333	36.88126167	no	TMP016939	7116	7116	NA	0	0	0	0	0	0	0	0	0	0	0	0	0	0	0	0	0	none	NA	ERS3415777 (SAMEA5611588)
INT004323	Plate 10	P160554	UZ026329	DAN033ROD3	rodent	w_mammal	wildlife	DAN033	13/01/2016	DANDORA 'B'	313	6	-1.241171667	36.910715	no	INT004323	7093	7093	NA	0	0	0	0	0	0	0	0	0	0	0	0	0	0	0	0	0	none	NA	ERS3415077 (SAMEA5610887)
ALQ019097	Plate 03	P160305	UZ025941	MAK017ROD2	rodent	w_mammal	wildlife	MAK017	27/10/2015	MAKONGENI	230	6	-1.298248333	36.84727333	yes	ALQ019097	7020	7020	NA	0	0	0	0	0	0	5	1	30	0	0	0	0	0	0	0	0	monogastrics birds	NA	ERS3414725 (SAMEA5610535)
INT005276	Plate 09	P160554	UZ027464	EAS044ROD4	rodent	w_mammal	wildlife	EAS044	15/03/2016	EASTLEIGH NORTH	330	5	-1.268461667	36.84851	yes	INT005276	7020	7020	NA	0	0	5	0	0	0	0	0	0	0	0	0	0	0	2	0	0	ruminants birds	NA	ERS3415208 (SAMEA5611018)
TWAG00300	Plate 09	P160554	UZ029362	MIH068AVN7	avian	w_avian	wildlife	MIH068	08/06/2016	MIHANGO	270	5	-1.267946667	36.94829	yes	TWAG00300	7020	7020	NA	0	0	0	0	0	0	6	0	7	0	0	0	0	0	0	0	0	monogastrics birds	NA	ERS3416241 (SAMEA5612053)
INT003342	Plate 10	P160554	UZ026341	UMJ036ROD2	rodent	w_mammal	wildlife	UMJ036	27/01/2016	UMOJA	212	4	-1.278311667	36.88803	yes	INT003342	6968	6968	NA	0	0	5	0	0	0	28	0	24	0	0	0	0	0	3	0	0	ruminants monogastrics birds	NA	ERS3415024 (SAMEA5610834)
PLQ2445	Plate 16	P160810	UZ030643	KTS089GAL5	chickens	poultry	livestock	KTS089	06/09/2016	KITISURU	110	1	-1.237836407	36.75603901	yes	PLQ2445	6889	6889	NA	0	0	0	0	0	0	0	0	0	7	0	0	0	0	0	0	0	birds	NA	ERS3415623 (SAMEA5611434)
TMP024203	Plate 18	P160773	UZ035259	LOR098AVN1	avian	w_avian	wildlife	LOR098	28/09/2016	LORESHO	120	1	-1.24741938	36.7508106	yes	TMP024203	6889	6889	NA	0	0	3	0	1	0	0	0	21	14	0	2	0	0	0	0	0	ruminants birds	NA	ERS3416203 (SAMEA5612015)
INT005886	Plate 09	P160554	UZ028269	LUM052HUM2	human	human	human	LUM052	11/04/2016	LUMUMBA (JERICHO)	220	6	-1.291	36.868835	no	INT005886	6852	6852	NA	0	0	0	0	0	0	0	0	0	0	0	0	0	0	0	0	0	none	NA	ERS3415288 (SAMEA5611098)
ALQ019875	Plate 12	P160719	UZ026603	KYL026SUI4	pig	monogastric	livestock	KYL026	24/11/2015	KAYOLE	313	6	-1.276371667	36.920625	yes	ALQ019875	6833	6833	NA	0	0	0	0	0	14	0	0	40	0	0	0	0	0	0	0	0	monogastrics birds	NA	ERS3414790 (SAMEA5610600)
PLQ000657	Plate 14	P160720	UZ022163	NGN080GAL1	chickens	poultry	livestock	NGN080	09/08/2016	NGUNDU	270	5	-1.27306	37.05743667	yes	PLQ000657	6833	6833	NA	0	0	4	0	3	0	0	0	115	0	0	4	0	0	0	0	0	ruminants birds	NA	ERS3415551 (SAMEA5611362)
INT007766	Plate 07	P160553	UZ028694	KOR058ROD1	rodent	w_mammal	wildlife	KOR058	09/05/2016	NYAYO (KOROGOCHO)	312	7	-1.25093	36.88799667	yes	INT007766	6805	6805	NA	0	0	17	0	1	0	0	0	20	0	0	3	0	0	0	0	0	ruminants birds	NA	ERS3415393 (SAMEA5611204)
INT006314	Plate 21	P170066	UZ027597	MIH067AVN5	avian	w_avian	wildlife	MIH067	07/06/2016	MIHANGO	270	5	-1.273335	36.944275	yes	INT006314	6768	6768	NA	0	3	0	0	0	0	0	0	30	0	0	0	0	11	0	0	0	ruminants birds	NA	ERS3415311 (SAMEA5611121)
TWAG1775	Plate 17	P160773	UZ030548	BOM091ANA3	geese	poultry	livestock	BOM091	13/09/2016	BOMAS	211	3	-1.320306667	36.78094667	yes	TWAG1775	6750	6750	NA	0	0	0	0	0	0	2	0	15	0	0	0	2	3	2	0	3	monogastrics birds	NA	ERS3416268 (SAMEA5612080)
ALQ019080	Plate 13	P160720	UZ027508	KIL041ANA4	geese	poultry	livestock	KIL041	08/03/2016	KILIMANI	110	2	-1.291786185	36.78376162	yes	ALQ019080	6740	6740	NA	0	0	0	3	3	0	33	0	167	0	0	6	3	4	6	0	0	ruminants monogastrics birds	NA	ERS3414724 (SAMEA5610534)
TMP024412	Plate 18	P160773	UZ031062	LOR097GAL4	chickens	poultry	livestock	LOR097	27/09/2016	LORESHO	110	1	-1.247168333	36.764595	yes	TMP024412	6736	6736	NA	0	0	0	0	0	0	0	0	13	0	0	0	0	16	0	0	0	birds	NA	ERS3416219 (SAMEA5612031)
TMP020424	Plate 07	P160553	UZ029535	MIH067BOV1	bovine	ruminant	livestock	MIH067	07/06/2016	MIHANGO	270	5	-1.273335	36.944275	yes	TMP020424	6726	6726	NA	0	3	0	0	0	0	0	0	30	0	0	0	0	11	0	0	0	ruminants birds	NA	ERS3415962 (SAMEA5611773)
TMP016954	Plate 01	P160078	UZ025760	HAR011HUM1	human	human	human	HAR011	05/10/2015	HARAMBEE	211	3	-1.287711667	36.87792167	yes	TMP016954	6701	6701	NA	0	0	0	0	0	0	40	0	0	0	0	0	0	0	0	0	0	monogastrics birds	NA	ERS3415779 (SAMEA5611590)
ALQ018643	Plate 07	P160553	UZ025851	MBO014ANA3	ducks	poultry	livestock	MBO014	12/10/2015	MBOTELA	240	5	-1.298803333	36.86333833	yes	ALQ018643	6636	6636	NA	0	0	0	0	0	0	3	3	12	0	0	8	0	3	0	0	0	monogastrics birds	NA	ERS3414703 (SAMEA5610513)
ALQ017153	Plate 09	P160554	UZ027581	KIL042GAL5	chickens	poultry	livestock	KIL042	09/03/2016	KILIMANI	130	2	-1.297515	36.78249167	yes	ALQ017153	6635	6635	NA	0	0	6	0	0	0	0	0	6	0	0	0	0	0	0	0	0	ruminants birds	NA	ERS3414672 (SAMEA5610482)
ECL000675	Plate 12	P160719	UZ027569	KIL042GAL6	chickens	poultry	livestock	KIL042	09/03/2016	KILIMANI	130	2	-1.297515	36.78249167	yes	ECL000675	6635	6635	NA	0	0	6	0	0	0	0	0	6	0	0	0	0	0	0	0	0	ruminants birds	NA	ERS3414983 (SAMEA5610793)
ALQ020070	Plate 04	P160305	UZ026679	UTH028AVN2	avian	w_avian	wildlife	UTH028	30/11/2015	UTHIRU	260	6	-1.263931667	36.70259	yes	ALQ020070	6633	6633	NA	0	7	0	0	0	0	0	0	0	0	0	0	0	0	0	0	0	ruminants	NA	ERS3414815 (SAMEA5610625)
INT006213	Plate 19	P160812	UZ027349	SPV064BAT1	bat	w_bat	wildlife	SPV064	23/05/2016	SPRING VALLEY	110	2	-1.253818333	36.790205	yes	INT006213	6488	6488	NA	0	1	0	3	5	0	6	0	4	0	0	0	3	0	1	0	0	ruminants monogastrics birds	NA	ERS3415309 (SAMEA5611119)
TMP015311	Plate 14	P160720	UZ025145	VIW001GAL7	chickens	poultry	livestock	VIW001	31/08/2015	VIWANDANI	312	7	-1.313058333	36.85866167	yes	TMP015311	6396	6396	NA	0	0	0	4	0	0	0	0	200	0	0	0	0	5	0	0	0	ruminants birds	NA	ERS3415663 (SAMEA5611474)
TMP019768	Plate 01	P160078	UZ026384	MLK022HUM2	human	human	human	MLK022	09/11/2015	MLANGO KUBWA	312	7	-1.265345	36.85309833	no	TMP019768	6335	6335	NA	0	0	0	0	0	0	0	0	0	0	0	0	0	0	0	0	0	none	NA	ERS3415911 (SAMEA5611722)
ALQ017443	Plate 10	P160554	UZ025435	HAR010AVN1	avian	w_avian	wildlife	HAR010	06/10/2015	HARAMBEE	211	3	-1.293191667	36.88320833	yes	ALQ017443	6190	6190	NA	0	0	0	0	0	0	0	0	5	0	0	0	0	0	0	0	0	birds	NA	ERS3414693 (SAMEA5610503)
INT010045	Plate 18	P160773	UZ035297	SPV100AVN6	avian	w_avian	wildlife	SPV100	05/10/2016	SPRING VALLEY	110	2	-1.254815	36.77469833	yes	INT010045	6190	6190	NA	0	0	0	0	0	0	4	0	1	0	0	9	4	1	1	70	0	monogastrics birds	NA	ERS3415459 (SAMEA5611270)
ALQ020153	Plate 03	P160305	UZ026682	UTH028AVN4	avian	w_avian	wildlife	UTH028	30/11/2015	UTHIRU	260	6	-1.263931667	36.70259	yes	ALQ020153	6186	6186	NA	0	7	0	0	0	0	0	0	0	0	0	0	0	0	0	0	0	ruminants	NA	ERS3414827 (SAMEA5610637)
PLQ000629	Plate 21	P170066	UZ035081	NGN079AVN2	avian	w_avian	wildlife	NGN079	08/08/2016	NGUNDU	270	5	-1.268731667	37.06599	yes	PLQ000629	6186	6186	NA	6	0	0	0	10	0	0	0	3	0	0	0	0	0	0	0	0	ruminants birds other	NA	ERS3415546 (SAMEA5611357)
INT004696	Plate 05	P160465	UZ027217	KRR037BOV1	bovine	ruminant	livestock	KRR037	09/02/2016	KARURA	120	2	-1.215838333	36.8016	yes	INT004696	6178	6178	NA	0	5	0	0	0	0	0	0	6	250	0	0	0	0	0	0	0	ruminants birds	NA	ERS3415132 (SAMEA5610942)
INT004723	Plate 05	P160465	UZ027184	KRR037HUM2	human	human	human	KRR037	09/02/2016	KARURA	120	2	-1.215838333	36.8016	yes	INT004723	6178	6178	NA	0	5	0	0	0	0	0	0	6	250	0	0	0	0	0	0	0	ruminants birds	NA	ERS3415135 (SAMEA5610945)
INT007678	Plate 08	P160553	UZ028743	KOR058CAP4	goat	ruminant	livestock	KOR058	09/05/2016	NYAYO (KOROGOCHO)	312	7	-1.25093	36.88799667	yes	INT007678	6175	6175	NA	0	0	17	0	1	0	0	0	20	0	0	3	0	0	0	0	0	ruminants birds	NA	ERS3415381 (SAMEA5611192)
TMP019956	Plate 01	P160078	UZ026392	MLK023OVN3	sheep	ruminant	livestock	MLK023	10/11/2015	MLANGO KUBWA	312	7	-1.264538333	36.85216167	yes	TMP019956	6175	6175	NA	0	26	2	0	4	0	0	0	0	0	0	0	0	0	0	0	0	ruminants	NA	ERS3415938 (SAMEA5611749)
INT007737	Plate 07	P160553	UZ028650	KOR059ROD2	rodent	w_mammal	wildlife	KOR059	10/05/2016	NYAYO (KOROGOCHO)	312	7	-1.253945	36.88923667	yes	INT007737	6096	6096	NA	0	0	0	0	0	10	0	0	0	0	0	0	0	0	0	0	0	monogastrics	NA	ERS3415389 (SAMEA5611200)
TMP024217	Plate 17	P160773	UZ031295	LOR098ANA1	ducks	poultry	livestock	LOR098	28/09/2016	LORESHO	120	1	-1.24741938	36.7508106	yes	TMP024217	6096	6096	NA	0	0	3	0	1	0	0	0	21	14	0	2	0	0	0	0	0	ruminants birds	NA	ERS3416205 (SAMEA5612017)
TMP024240	Plate 21	P170066	UZ035248	LOR098CNV2	carnivore	w_mammal	wildlife	LOR098	28/09/2016	LORESHO	120	1	-1.24741938	36.7508106	yes	TMP024240	6096	6096	NA	0	0	3	0	1	0	0	0	21	14	0	2	0	0	0	0	0	ruminants birds	NA	ERS3416208 (SAMEA5612020)
TMP024305	Plate 18	P160773	UZ035291	SPV100ROD1	rodent	w_mammal	wildlife	SPV100	05/10/2016	SPRING VALLEY	110	2	-1.254815	36.77469833	yes	TMP024305	6096	6096	NA	0	0	0	0	0	0	4	0	1	0	0	9	4	1	1	70	0	monogastrics birds	NA	ERS3416218 (SAMEA5612030)
TMP019044	Plate 07	P160553	UZ026402	MLK023BOV2	bovine	ruminant	livestock	MLK023	10/11/2015	MLANGO KUBWA	312	7	-1.264538333	36.85216167	yes	TMP019044	6071	6071	NA	0	26	2	0	4	0	0	0	0	0	0	0	0	0	0	0	0	ruminants	NA	ERS3415828 (SAMEA5611639)
TMP020872	Plate 13	P160720	UZ029440	GTN075AVN4	avian	w_avian	wildlife	GTN075	13/07/2016	GATINA	260	6	-1.275552495	36.75860432	no	TMP020872	6071	6071	NA	0	0	0	0	0	0	0	0	0	0	0	0	0	0	0	0	0	none	NA	ERS3416008 (SAMEA5611819)
ALQ019137	Plate 16	P160810	UZ027545	KIL041LAG1	rabbit	monogastric	livestock	KIL041	08/03/2016	KILIMANI	110	2	-1.291786185	36.78376162	yes	ALQ019137	6060	6060	NA	0	0	0	3	3	0	33	0	167	0	0	6	3	4	6	0	0	ruminants monogastrics birds	NA	ERS3414728 (SAMEA5610538)
INT004405	Plate 10	P160554	UZ027051	UMJ034HUM3	human	human	human	UMJ034	25/01/2016	UMOJA	212	4	-1.287877775	36.88810325	no	INT004405	6018	6018	NA	0	0	0	0	0	0	0	0	0	0	0	0	0	0	0	0	0	none	NA	ERS3415090 (SAMEA5610900)
INT006156	Plate 12	P160719	UZ029289	SPV064GAL2	chickens	poultry	livestock	SPV064	23/05/2016	SPRING VALLEY	110	2	-1.253818333	36.790205	yes	INT006156	6018	6018	NA	0	1	0	3	5	0	6	0	4	0	0	0	3	0	1	0	0	ruminants monogastrics birds	NA	ERS3415308 (SAMEA5611118)
TMP016618	Plate 01	P160078	UZ025195	VIW002BOV2	bovine	ruminant	livestock	VIW002	01/09/2015	VIWANDANI	312	7	-1.309915	36.878755	yes	TMP016618	5997	5997	NA	0	3	0	0	0	15	3	0	5	0	0	0	0	0	0	0	0	ruminants monogastrics birds	NA	ERS3415753 (SAMEA5611564)
PLQ2335	Plate 15	P160810	UZ030220	KTS089HUM6	human	human	human	KTS089	06/09/2016	KITISURU	110	1	-1.237836407	36.75603901	yes	PLQ2335	5919	5919	NA	0	0	0	0	0	0	0	0	0	7	0	0	0	0	0	0	0	birds	NA	ERS3415614 (SAMEA5611425)
TMP021673	Plate 18	P160773	UZ028134	KHW050GAL4	chickens	poultry	livestock	KHW050	06/04/2016	KAHAWA WEST / JUJA K	311	6	-1.179393235	36.90742073	yes	TMP021673	5909	5909	NA	0	0	4	11	0	0	0	0	20	0	0	0	14	4	5	0	0	ruminants birds	NA	ERS3416090 (SAMEA5611901)
TMP024168	Plate 18	P160773	UZ031082	LOR098LAG1	rabbit	monogastric	livestock	LOR098	28/09/2016	LORESHO	120	1	-1.24741938	36.7508106	yes	TMP024168	5909	5909	NA	0	0	3	0	1	0	0	0	21	14	0	2	0	0	0	0	0	ruminants birds	NA	ERS3416199 (SAMEA5612011)
TMP019109	Plate 02	P160078	UZ026085	MAK017GAL3	chickens	poultry	livestock	MAK017	27/10/2015	MAKONGENI	230	6	-1.298248333	36.84727333	yes	TMP019109	5869	5869	NA	0	0	0	0	0	0	5	1	30	0	0	0	0	0	0	0	0	monogastrics birds	NA	ERS3415833 (SAMEA5611644)
TMP023964	Plate 17	P160773	UZ035316	LOR097AVN1	avian	w_avian	wildlife	LOR097	27/09/2016	LORESHO	110	1	-1.247168333	36.764595	yes	TMP023964	5840	5840	NA	0	0	0	0	0	0	0	0	13	0	0	0	0	16	0	0	0	birds	NA	ERS3416167 (SAMEA5611979)
TMP023970	Plate 17	P160773	UZ035312	LOR097AVN5	avian	w_avian	wildlife	LOR097	27/09/2016	LORESHO	110	1	-1.247168333	36.764595	yes	TMP023970	5840	5840	NA	0	0	0	0	0	0	0	0	13	0	0	0	0	16	0	0	0	birds	NA	ERS3416168 (SAMEA5611980)
INT005334	Plate 06	P160465	UZ027964	STC046GAL1	chickens	poultry	livestock	STC046	22/03/2016	SOUTH C	211	3	-1.325046667	36.81989167	yes	INT005334	5834	5834	NA	0	0	0	0	0	0	0	0	9	0	0	0	0	0	0	0	0	birds	NA	ERS3415216 (SAMEA5611026)
ALQ017407	Plate 07	P160553	UZ025801	HAR010GAL3	chickens	poultry	livestock	HAR010	06/10/2015	HARAMBEE	211	3	-1.293191667	36.88320833	yes	ALQ017407	5766	5766	NA	0	0	0	0	0	0	0	0	5	0	0	0	0	0	0	0	0	birds	NA	ERS3414691 (SAMEA5610501)
TMP016779	Plate 14	P160720	UZ025779	HAR010GAL1	chickens	poultry	livestock	HAR010	06/10/2015	HARAMBEE	211	3	-1.293191667	36.88320833	yes	TMP016779	5766	5766	NA	0	0	0	0	0	0	0	0	5	0	0	0	0	0	0	0	0	birds	NA	ERS3415761 (SAMEA5611572)
INT005541	Plate 09	P160554	UZ027381	KHW049ROD2	rodent	w_mammal	wildlife	KHW049	05/04/2016	KAHAWA WEST / JUJA K	311	6	-1.179655	36.90618833	yes	INT005541	5625	5625	NA	0	5	0	0	0	0	0	0	18	0	0	0	0	0	0	0	0	ruminants birds	NA	ERS3415242 (SAMEA5611052)
TMP020931	Plate 14	P160720	UZ022031	GTN073AVN3	avian	w_avian	wildlife	GTN073	12/07/2016	GATINA	260	6	-1.27637736	36.75747462	yes	TMP020931	5597	5597	NA	0	4	0	0	0	0	0	0	6	0	0	0	0	0	0	0	0	ruminants birds	NA	ERS3416018 (SAMEA5611829)
INT007630	Plate 07	P160553	UZ028699	MWK057HUM1	human	human	human	MWK057	05/05/2016	MWIKI	313	6	-1.229788913	36.92984478	yes	INT007630	5575	5575	NA	0	0	4	0	0	11	0	0	4	0	0	16	0	0	0	0	0	ruminants monogastrics birds	NA	ERS3415374 (SAMEA5611185)
PLQ001005	Plate 16	P160810	UZ022257	MUT084CAP2	goat	ruminant	livestock	MUT084	17/08/2016	MUTHANGARI	110	2	-1.265065	36.78292	yes	PLQ001005	5419	5419	NA	0	0	0	2	0	0	0	0	2	0	0	0	0	0	0	0	0	ruminants birds	NA	ERS3415585 (SAMEA5611396)
PL015259	Plate 02	P160078	UZ025922	MBO015HUM2	human	human	human	MBO015	13/10/2015	MBOTELA	240	5	-1.29833	36.85970667	no	PL015259	5406	5406	NA	0	0	0	0	0	0	0	0	0	0	0	0	0	0	0	0	0	none	NA	ERS3415508 (SAMEA5611319)
ALQ019637	Plate 04	P160305	UZ026645	KYL025CAP2	goat	ruminant	livestock	KYL025	16/11/2015	KAYOLE	313	6	-1.265657435	36.91767563	yes	ALQ019637	5334	5334	NA	0	1	14	0	0	0	0	0	0	0	0	2	0	0	0	0	0	ruminants birds	NA	ERS3414760 (SAMEA5610570)
TMP019837	Plate 02	P160078	UZ026419	MLK023BOV1	bovine	ruminant	livestock	MLK023	10/11/2015	MLANGO KUBWA	312	7	-1.264538333	36.85216167	yes	TMP019837	5277	5277	NA	0	26	2	0	4	0	0	0	0	0	0	0	0	0	0	0	0	ruminants	NA	ERS3415922 (SAMEA5611733)
INT004680	Plate 05	P160465	UZ026904	KRR037GAL8	chickens	poultry	livestock	KRR037	09/02/2016	KARURA	120	2	-1.215838333	36.8016	yes	INT004680	5273	5273	NA	0	5	0	0	0	0	0	0	6	250	0	0	0	0	0	0	0	ruminants birds	NA	ERS3415129 (SAMEA5610939)
INT004683	Plate 05	P160465	UZ027233	KRR037GAL3	chickens	poultry	livestock	KRR037	09/02/2016	KARURA	120	2	-1.215838333	36.8016	yes	INT004683	5273	5273	NA	0	5	0	0	0	0	0	0	6	250	0	0	0	0	0	0	0	ruminants birds	NA	ERS3415130 (SAMEA5610940)
TMP016398	Plate 01	P160078	UZ025644	KAN008GAL3	chickens	poultry	livestock	KAN008	22/09/2015	KAREN	110	1	-1.338961667	36.70231333	yes	TMP016398	5273	5273	NA	0	0	0	0	0	0	0	0	140	0	0	0	0	0	0	0	0	birds	NA	ERS3415732 (SAMEA5611543)
ALQ034618	Plate 17	P160773	UZ035239	EMB087ROD1	rodent	w_mammal	wildlife	EMB087	24/08/2016	EMBAKASI	211	4	-1.310101667	36.89491333	yes	ALQ034618	5122	5122	NA	0	0	0	0	0	0	6	0	20	0	0	0	0	0	0	0	0	monogastrics birds	NA	ERS3414941 (SAMEA5610751)
INT008593	Plate 13	P160720	UZ030459	EMB087HUM2	human	human	human	EMB087	24/08/2016	EMBAKASI	211	4	-1.310101667	36.89491333	yes	INT008593	5122	5122	NA	0	0	0	0	0	0	6	0	20	0	0	0	0	0	0	0	0	monogastrics birds	NA	ERS3415434 (SAMEA5611245)
TMP017045	Plate 02	P160078	UZ025876	MBO014GAL1	chickens	poultry	livestock	MBO014	12/10/2015	MBOTELA	240	5	-1.298803333	36.86333833	yes	TMP017045	5086	5086	NA	0	0	0	0	0	0	3	3	12	0	0	8	0	3	0	0	0	monogastrics birds	NA	ERS3415782 (SAMEA5611593)
INT004533	Plate 05	P160465	UZ027121	UMJ036LAG1	rabbit	monogastric	livestock	UMJ036	27/01/2016	UMOJA	212	4	-1.278311667	36.88803	yes	INT004533	5082	5082	NA	0	0	5	0	0	0	28	0	24	0	0	0	0	0	3	0	0	ruminants monogastrics birds	NA	ERS3415109 (SAMEA5610919)
PL015176	Plate 02	P160078	UZ025159	MBO013HUM2	human	human	human	MBO013	13/10/2015	MBOTELA	240	5	-1.298876667	36.86243	yes	PL015176	4995	4995	NA	0	0	7	0	0	0	0	0	0	0	0	0	0	0	0	0	0	ruminants	NA	ERS3415501 (SAMEA5611312)
TMP019778	Plate 02	P160078	UZ026428	MLK023HUM4	human	human	human	MLK023	10/11/2015	MLANGO KUBWA	312	7	-1.264538333	36.85216167	yes	TMP019778	4995	4995	NA	0	26	2	0	4	0	0	0	0	0	0	0	0	0	0	0	0	ruminants	NA	ERS3415913 (SAMEA5611724)
TMP020939	Plate 14	P160720	UZ022044	GTN073AVN11	avian	w_avian	wildlife	GTN073	12/07/2016	GATINA	260	6	-1.27637736	36.75747462	yes	TMP020939	4995	4995	NA	0	4	0	0	0	0	0	0	6	0	0	0	0	0	0	0	0	ruminants birds	NA	ERS3416019 (SAMEA5611830)
INT005770	Plate 06	P160465	UZ028209	KHW050GAL1	chickens	poultry	livestock	KHW050	06/04/2016	KAHAWA WEST / JUJA K	311	6	-1.179393235	36.90742073	yes	INT005770	4977	4977	NA	0	0	4	11	0	0	0	0	20	0	0	0	14	4	5	0	0	ruminants birds	NA	ERS3415275 (SAMEA5611085)
ALQ018627	Plate 07	P160553	UZ025832	MBO014GAL3	chickens	poultry	livestock	MBO014	12/10/2015	MBOTELA	240	5	-1.298803333	36.86333833	yes	ALQ018627	4937	4937	NA	0	0	0	0	0	0	3	3	12	0	0	8	0	3	0	0	0	monogastrics birds	NA	ERS3414702 (SAMEA5610512)
ALQ019375	Plate 07	P160553	UZ026181	KIG019GAL4	chickens	poultry	livestock	KIG019	02/11/2015	KIRIGU	260	6	-1.291726667	36.70118333	yes	ALQ019375	4937	4937	NA	0	0	16	0	0	2	0	0	5	0	0	0	0	0	0	0	0	ruminants monogastrics birds	NA	ERS3414733 (SAMEA5610543)
ALQ023140	Plate 07	P160553	UZ028572	KAS063HUM2	human	human	human	KAS063	18/05/2016	KASARANI	321	5	-1.22741664	36.92116014	yes	ALQ023140	4741	4741	NA	0	0	0	5	0	0	0	0	5	0	0	0	0	0	0	0	0	ruminants birds	NA	ERS3414857 (SAMEA5610667)
INT004400	Plate 05	P160465	UZ027056	UMJ034HUM1	human	human	human	UMJ034	25/01/2016	UMOJA	212	4	-1.287877775	36.88810325	no	INT004400	4741	4741	NA	0	0	0	0	0	0	0	0	0	0	0	0	0	0	0	0	0	none	NA	ERS3415089 (SAMEA5610899)
TMP024251	Plate 17	P160773	UZ030702	LOR098HUM5	human	human	human	LOR098	28/09/2016	LORESHO	120	1	-1.24741938	36.7508106	yes	TMP024251	4732	4732	Yes	0	0	3	0	1	0	0	0	21	14	0	2	0	0	0	0	0	ruminants birds	NA	ERS3416210 (SAMEA5612022)
TWAG1857	Plate 17	P160773	UZ035186	BOM091ROD1	rodent	w_mammal	wildlife	BOM091	13/09/2016	BOMAS	211	3	-1.320306667	36.78094667	yes	TWAG1857	4732	4732	Yes	0	0	0	0	0	0	2	0	15	0	0	0	2	3	2	0	3	monogastrics birds	NA	ERS3416281 (SAMEA5612093)
TWAG1748	Plate 18	P160773	UZ030647	BOM091GAL1	chickens	poultry	livestock	BOM091	13/09/2016	BOMAS	211	3	-1.320306667	36.78094667	yes	TWAG1748	4704	4704	NA	0	0	0	0	0	0	2	0	15	0	0	0	2	3	2	0	3	monogastrics birds	NA	ERS3416264 (SAMEA5612076)
TMP022281	Plate 09	P160554	UZ027467	EAS043ROD1	rodent	w_mammal	wildlife	EAS043	14/03/2016	EASTLEIGH NORTH	330	5	-1.266996667	36.84912833	yes	TMP022281	4682	4682	NA	0	0	0	0	0	0	0	0	8	0	0	0	0	0	0	0	0	birds	NA	ERS3416114 (SAMEA5611926)
ALQ019694	Plate 03	P160305	UZ026608	KYL027HUM1	human	human	human	KYL027	17/11/2015	KAYOLE	313	6	-1.273571667	36.91366667	no	ALQ019694	4623	4623	NA	0	0	0	0	0	0	0	0	0	0	0	0	0	0	0	0	0	none	NA	ERS3414766 (SAMEA5610576)
TMP022563	Plate 21	P170066	UZ022055	GTN074AVN1	avian	w_avian	wildlife	GTN074	13/07/2016	GATINA	260	6	-1.291341667	36.75221	yes	TMP022563	4598	4598	NA	0	0	0	0	3	0	0	0	7	0	0	0	0	0	0	0	0	ruminants birds	NA	ERS3416120 (SAMEA5611932)
ALQ020420	Plate 18	P160773	UZ026717	UTH028ROD1	rodent	w_mammal	wildlife	UTH028	30/11/2015	UTHIRU	260	6	-1.263931667	36.70259	yes	ALQ020420	4578	4578	NA	0	7	0	0	0	0	0	0	0	0	0	0	0	0	0	0	0	ruminants	NA	ERS3414843 (SAMEA5610653)
ALQ017321	Plate 09	P160554	UZ025768	HAR011LAG6	rabbit	monogastric	livestock	HAR011	05/10/2015	HARAMBEE	211	3	-1.287711667	36.87792167	yes	ALQ017321	4568	4568	Yes	0	0	0	0	0	0	40	0	0	0	0	0	0	0	0	0	0	monogastrics birds	NA	ERS3414683 (SAMEA5610493)
ALQ017332	Plate 14	P160720	UZ025762	HAR011LAG5	rabbit	monogastric	livestock	HAR011	05/10/2015	HARAMBEE	211	3	-1.287711667	36.87792167	yes	ALQ017332	4568	4568	Yes	0	0	0	0	0	0	40	0	0	0	0	0	0	0	0	0	0	monogastrics birds	NA	ERS3414685 (SAMEA5610495)
TMP016046	Plate 02	P160078	UZ025766	HAR011LAG7	rabbit	monogastric	livestock	HAR011	05/10/2015	HARAMBEE	211	3	-1.287711667	36.87792167	yes	TMP016046	4568	4568	Yes	0	0	0	0	0	0	40	0	0	0	0	0	0	0	0	0	0	monogastrics birds	NA	ERS3415694 (SAMEA5611505)
TMP016335	Plate 01	P160078	UZ025746	HAR011LAG12	rabbit	monogastric	livestock	HAR011	05/10/2015	HARAMBEE	211	3	-1.287711667	36.87792167	yes	TMP016335	4568	4568	Yes	0	0	0	0	0	0	40	0	0	0	0	0	0	0	0	0	0	monogastrics birds	NA	ERS3415722 (SAMEA5611533)
INT000414	Plate 02	P160078	UZ025577	MSA005HUM2	human	human	human	MSA005	16/09/2015	MOWLEM = SAIKA	311	6	-1.253531667	36.92563333	no	INT000414	4537	4537	NA	0	0	0	0	0	0	0	0	0	0	0	0	0	0	0	0	0	none	NA	ERS3414998 (SAMEA5610808)
INT010095	Plate 18	P160773	UZ030678	SPV100NUM1	guinea_fowl	poultry	livestock	SPV100	05/10/2016	SPRING VALLEY	110	2	-1.254815	36.77469833	yes	INT010095	4537	4537	NA	0	0	0	0	0	0	4	0	1	0	0	9	4	1	1	70	0	monogastrics birds	NA	ERS3415468 (SAMEA5611279)
TWAG1831	Plate 17	P160773	UZ022210	BOM091HUM2	human	human	human	BOM091	13/09/2016	BOMAS	211	3	-1.320306667	36.78094667	yes	TWAG1831	4537	4537	NA	0	0	0	0	0	0	2	0	15	0	0	0	2	3	2	0	3	monogastrics birds	NA	ERS3416277 (SAMEA5612089)
PLQ000489	Plate 21	P170066	UZ035027	GWK076ROD1	rodent	w_mammal	wildlife	GWK076	19/07/2016	GATWIKIRA	312	7	-1.31708	36.77864167	yes	PLQ000489	4532	4532	NA	0	0	0	0	0	20	0	0	0	0	16	0	0	0	0	0	0	monogastrics birds	NA	ERS3415525 (SAMEA5611336)
TWAG00214	Plate 08	P160553	UZ029549	MIH068HUM3	human	human	human	MIH068	08/06/2016	MIHANGO	270	5	-1.267946667	36.94829	yes	TWAG00214	4532	4532	NA	0	0	0	0	0	0	6	0	7	0	0	0	0	0	0	0	0	monogastrics birds	NA	ERS3416232 (SAMEA5612044)
INT003118	Plate 18	P160773	UZ027231	KRR037GAL5	chickens	poultry	livestock	KRR037	09/02/2016	KARURA	120	2	-1.215838333	36.8016	yes	INT003118	4481	4481	NA	0	5	0	0	0	0	0	0	6	250	0	0	0	0	0	0	0	ruminants birds	NA	ERS3415009 (SAMEA5610819)
INT005229	Plate 06	P160465	UZ027681	EAS044CAP1	goat	ruminant	livestock	EAS044	15/03/2016	EASTLEIGH NORTH	330	5	-1.268461667	36.84851	yes	INT005229	4434	4434	NA	0	0	5	0	0	0	0	0	0	0	0	0	0	0	2	0	0	ruminants birds	NA	ERS3415204 (SAMEA5611014)
TMP021217	Plate 19	P160812	UZ022327	GWK076SUI1	pig	monogastric	livestock	GWK076	19/07/2016	GATWIKIRA	312	7	-1.31708	36.77864167	yes	TMP021217	4398	4398	NA	0	0	0	0	0	20	0	0	0	0	16	0	0	0	0	0	0	monogastrics birds	NA	ERS3416060 (SAMEA5611871)
INT005778	Plate 06	P160465	UZ028218	KHW050NUM2	guinea_fowl	poultry	livestock	KHW050	06/04/2016	KAHAWA WEST / JUJA K	311	6	-1.179393235	36.90742073	yes	INT005778	4389	4389	NA	0	0	4	11	0	0	0	0	20	0	0	0	14	4	5	0	0	ruminants birds	NA	ERS3415276 (SAMEA5611086)
INT005172	Plate 06	P160465	UZ027715	EAS044CAP2	goat	ruminant	livestock	EAS044	15/03/2016	EASTLEIGH NORTH	330	5	-1.268461667	36.84851	yes	INT005172	4360	4360	NA	0	0	5	0	0	0	0	0	0	0	0	0	0	0	2	0	0	ruminants birds	NA	ERS3415194 (SAMEA5611004)
ALQ028724	Plate 15	P160810	UZ029278	KAS063GAL4	chickens	poultry	livestock	KAS063	18/05/2016	KASARANI	321	5	-1.22741664	36.92116014	yes	ALQ028724	4296	4296	NA	0	0	0	5	0	0	0	0	5	0	0	0	0	0	0	0	0	ruminants birds	NA	ERS3414914 (SAMEA5610724)
INT004888	Plate 05	P160465	UZ027503	KIL041GAL1	chickens	poultry	livestock	KIL041	08/03/2016	KILIMANI	110	2	-1.291786185	36.78376162	yes	INT004888	4243	4243	NA	0	0	0	3	3	0	33	0	167	0	0	6	3	4	6	0	0	ruminants monogastrics birds	NA	ERS3415158 (SAMEA5610968)
ALQ034903	Plate 11	P160719	UZ030806	KTS089HUM3	human	human	human	KTS089	06/09/2016	KITISURU	110	1	-1.237836407	36.75603901	yes	ALQ034903	4151	4151	NA	0	0	0	0	0	0	0	0	0	7	0	0	0	0	0	0	0	birds	NA	ERS3414972 (SAMEA5610782)
INT005983	Plate 10	P160554	UZ027425	LUM054ROD2	rodent	w_mammal	wildlife	LUM054	13/04/2016	LUMUMBA (JERICHO)	220	6	-1.293103333	36.871635	yes	INT005983	4096	4096	NA	0	0	44	0	0	0	0	0	5	0	0	12	0	0	0	0	0	ruminants birds	NA	ERS3415302 (SAMEA5611112)
PLQ000563	Plate 13	P160720	UZ022194	NGN079OVN3	sheep	ruminant	livestock	NGN079	08/08/2016	NGUNDU	270	5	-1.268731667	37.06599	yes	PLQ000563	4088	4088	NA	6	0	0	0	10	0	0	0	3	0	0	0	0	0	0	0	0	ruminants birds other	NA	ERS3415536 (SAMEA5611347)
PLQ000587	Plate 14	P160720	UZ022195	NGN079GAL2	chickens	poultry	livestock	NGN079	08/08/2016	NGUNDU	270	5	-1.268731667	37.06599	yes	PLQ000587	4088	4088	NA	6	0	0	0	10	0	0	0	3	0	0	0	0	0	0	0	0	ruminants birds other	NA	ERS3415540 (SAMEA5611351)
PLQ000593	Plate 14	P160720	UZ022139	NGN079OVN2	sheep	ruminant	livestock	NGN079	08/08/2016	NGUNDU	270	5	-1.268731667	37.06599	yes	PLQ000593	4088	4088	NA	6	0	0	0	10	0	0	0	3	0	0	0	0	0	0	0	0	ruminants birds other	NA	ERS3415541 (SAMEA5611352)
PLQ2329	Plate 18	P160773	UZ030386	KTS088AVN10	avian	w_avian	wildlife	KTS088	05/09/2016	KITISURU	110	1	-1.232017083	36.75897979	yes	PLQ2329	4080	4080	NA	0	4	0	0	0	0	0	0	7	5	0	6	7	0	0	0	0	ruminants birds	NA	ERS3415613 (SAMEA5611424)
ALQ034625	Plate 17	P160773	UZ035104	EMB085AVN6	avian	w_avian	wildlife	EMB085	22/08/2016	EMBAKASI	211	4	-1.311076667	36.89346167	yes	ALQ034625	4038	4038	NA	0	0	0	0	0	0	0	0	300	0	0	0	0	0	0	26	0	birds	NA	ERS3414942 (SAMEA5610752)
INT003888	Plate 13	P160720	UZ027005	DAN032GAL8	chickens	poultry	livestock	DAN032	12/01/2016	DANDORA 'B'	313	6	-1.24761043	36.90650254	yes	INT003888	4038	4038	NA	0	0	0	0	0	0	0	0	53	0	0	0	0	0	0	0	0	birds	NA	ERS3415045 (SAMEA5610855)
INT004181	Plate 03	P160305	UZ026947	DAN031BOV5	bovine	ruminant	livestock	DAN031	11/01/2016	DANDORA 'B'	313	6	-1.241636667	36.90821167	yes	INT004181	4038	4038	NA	0	9	0	0	0	0	0	0	13	0	0	0	0	0	0	0	0	ruminants birds	NA	ERS3415058 (SAMEA5610868)
INT004381	Plate 06	P160465	UZ2004748	DANDUMPAV_POP1	av_pop	w_avian	wildlife	DANDUMP	NA	NA	NA	NA	NA	NA	NA	INT004381	4038	4038	NA	NA	NA	NA	NA	NA	NA	NA	NA	NA	NA	NA	NA	NA	NA	NA	NA	NA	NA	NA	ERS3415086 (SAMEA5610896)
PL015049	Plate 02	P160078	UZ025897	MBO013CAP7	goat	ruminant	livestock	MBO013	13/10/2015	MBOTELA	240	5	-1.298876667	36.86243	yes	PL015049	4038	4038	NA	0	0	7	0	0	0	0	0	0	0	0	0	0	0	0	0	0	ruminants	NA	ERS3415485 (SAMEA5611296)
TMP015343	Plate 02	P160078	UZ025112	VIW001HUM5	human	human	human	VIW001	31/08/2015	VIWANDANI	312	7	-1.313058333	36.85866167	yes	TMP015343	4038	4038	NA	0	0	0	4	0	0	0	0	200	0	0	0	0	5	0	0	0	ruminants birds	NA	ERS3415666 (SAMEA5611477)
TMP020740	Plate 10	P160554	UZ028786	KWG071CAP3	goat	ruminant	livestock	KWG071	05/07/2016	KAWANGWARE	260	6	-1.280645	36.74687667	yes	TMP020740	4038	4038	NA	0	0	22	0	3	1	2	0	0	0	0	0	3	0	2	0	0	ruminants monogastrics birds	NA	ERS3415988 (SAMEA5611799)
TMP018787	Plate 12	P160719	UZ026890	UTH029GAL6	chickens	poultry	livestock	UTH029	02/12/2015	UTHIRU	260	6	-1.259986667	36.70342	yes	TMP018787	4038*	4038	NA	0	0	0	6	0	0	0	0	115	0	0	0	0	0	0	0	0	ruminants birds	NA	ERS3415817 (SAMEA5611628)
INT007674	Plate 15	P160810	UZ028736	KOR058GAL2	chickens	poultry	livestock	KOR058	09/05/2016	NYAYO (KOROGOCHO)	312	7	-1.25093	36.88799667	yes	INT007674	4015	4015	NA	0	0	17	0	1	0	0	0	20	0	0	3	0	0	0	0	0	ruminants birds	NA	ERS3415380 (SAMEA5611191)
INT005380	Plate 05	P160465	UZ028017	STC047GAL1	chickens	poultry	livestock	STC047	22/03/2016	SOUTH C	211	3	-1.325503333	36.82077667	yes	INT005380	3910	3910	NA	0	0	0	0	0	0	0	0	6	0	0	0	0	0	0	0	0	birds	NA	ERS3415220 (SAMEA5611030)
INT005386	Plate 06	P160465	UZ028020	STC047GAL2	chickens	poultry	livestock	STC047	22/03/2016	SOUTH C	211	3	-1.325503333	36.82077667	yes	INT005386	3910	3910	NA	0	0	0	0	0	0	0	0	6	0	0	0	0	0	0	0	0	birds	NA	ERS3415221 (SAMEA5611031)
INT005741	Plate 05	P160465	UZ027445	KHW050AVN10	avian	w_avian	wildlife	KHW050	06/04/2016	KAHAWA WEST / JUJA K	311	6	-1.179393235	36.90742073	yes	INT005741	3910	3910	NA	0	0	4	11	0	0	0	0	20	0	0	0	14	4	5	0	0	ruminants birds	NA	ERS3415271 (SAMEA5611081)
TMP016144	Plate 02	P160078	UZ025158	VIW002HUM1	human	human	human	VIW002	01/09/2015	VIWANDANI	312	7	-1.309915	36.878755	yes	TMP016144	3910	3910	NA	0	3	0	0	0	15	3	0	5	0	0	0	0	0	0	0	0	ruminants monogastrics birds	NA	ERS3415702 (SAMEA5611513)
TMP019816	Plate 02	P160078	UZ2004636	MLK024AVN4	avian	w_avian	wildlife	MLK024	11/11/2015	MLANGO KUBWA	312	7	-1.26418	36.85309167	yes	TMP019816	3910	3910	NA	0	0	0	0	0	0	0	0	8	0	0	7	0	0	0	0	0	birds	NA	ERS3415918 (SAMEA5611729)
TMP020397	Plate 07	P160553	UZ029544	MIH067HUM3	human	human	human	MIH067	07/06/2016	MIHANGO	270	5	-1.273335	36.944275	yes	TMP020397	3889	3889	NA	0	3	0	0	0	0	0	0	30	0	0	0	0	11	0	0	0	ruminants birds	NA	ERS3415959 (SAMEA5611770)
ALQ020112	Plate 15	P160810	UZ026807	UTH028HUM2	human	human	human	UTH028	30/11/2015	UTHIRU	260	6	-1.263931667	36.70259	yes	ALQ020112	3877	3877	NA	0	7	0	0	0	0	0	0	0	0	0	0	0	0	0	0	0	ruminants	NA	ERS3414822 (SAMEA5610632)
ALQ023254	Plate 08	P160553	UZ029217	SPV064HUM4	human	human	human	SPV064	23/05/2016	SPRING VALLEY	110	2	-1.253818333	36.790205	yes	ALQ023254	3877	3877	NA	0	1	0	3	5	0	6	0	4	0	0	0	3	0	1	0	0	ruminants monogastrics birds	NA	ERS3414873 (SAMEA5610683)
INT005001	Plate 05	P160465	UZ027647	KIL042HUM1	human	human	human	KIL042	09/03/2016	KILIMANI	130	2	-1.297515	36.78249167	yes	INT005001	3877	3877	NA	0	0	6	0	0	0	0	0	6	0	0	0	0	0	0	0	0	ruminants birds	NA	ERS3415172 (SAMEA5610982)
PLQ2385	Plate 21	P170066	UZ030777	KTS089HUM11	human	human	human	KTS089	06/09/2016	KITISURU	110	1	-1.237836407	36.75603901	yes	PLQ2385	3877	3877	NA	0	0	0	0	0	0	0	0	0	7	0	0	0	0	0	0	0	birds	NA	ERS3415618 (SAMEA5611429)
TMP014973	Plate 13	P160720	UZ025332	VIW002SUI4	pig	monogastric	livestock	VIW002	01/09/2015	VIWANDANI	312	7	-1.309915	36.878755	yes	TMP014973	3877	3877	NA	0	3	0	0	0	15	3	0	5	0	0	0	0	0	0	0	0	ruminants monogastrics birds	NA	ERS3415639 (SAMEA5611450)
ALQ019519	Plate 01	P160078	UZ026452	MLK024ANA1	ducks	poultry	livestock	MLK024	11/11/2015	MLANGO KUBWA	312	7	-1.26418	36.85309167	yes	ALQ019519	3856	3856	NA	0	0	0	0	0	0	0	0	8	0	0	7	0	0	0	0	0	birds	NA	ERS3414745 (SAMEA5610555)
INT010125	Plate 17	P160773	UZ030690	SPV100ANA1	geese	poultry	livestock	SPV100	05/10/2016	SPRING VALLEY	110	2	-1.254815	36.77469833	yes	INT010125	3856	3856	NA	0	0	0	0	0	0	4	0	1	0	0	9	4	1	1	70	0	monogastrics birds	NA	ERS3415473 (SAMEA5611284)
TMP016946	Plate 11	P160719	UZ2004445	HAR012AVN4	avian	w_avian	wildlife	HAR012	07/10/2015	HARAMBEE	211	3	-1.282213333	36.88126167	no	TMP016946	3856	3856	NA	0	0	0	0	0	0	0	0	0	0	0	0	0	0	0	0	0	none	NA	ERS3415778 (SAMEA5611589)
INT005828	Plate 10	P160554	UZ027407	KHW049ROD3	rodent	w_mammal	wildlife	KHW049	05/04/2016	KAHAWA WEST / JUJA K	311	6	-1.179655	36.90618833	yes	INT005828	3716	3716	NA	0	5	0	0	0	0	0	0	18	0	0	0	0	0	0	0	0	ruminants birds	NA	ERS3415282 (SAMEA5611092)
INT003258	Plate 14	P160720	UZ027502	KIL041GAL2	chickens	poultry	livestock	KIL041	08/03/2016	KILIMANI	110	2	-1.291786185	36.78376162	yes	INT003258	3714	3714	NA	0	0	0	3	3	0	33	0	167	0	0	6	3	4	6	0	0	ruminants monogastrics birds	NA	ERS3415019 (SAMEA5610829)
INT003823	Plate 03	P160305	UZ2004833	KRR038AVN4	avian	w_avian	wildlife	KRR038	15/02/2016	KARURA	120	2	-1.216581667	36.79006167	no	INT003823	3714	3714	NA	0	0	0	0	0	0	0	0	0	0	0	0	0	0	0	0	0	none	NA	ERS3415043 (SAMEA5610853)
INT005756	Plate 05	P160465	UZ028226	KHW050CAP2	goat	ruminant	livestock	KHW050	06/04/2016	KAHAWA WEST / JUJA K	311	6	-1.179393235	36.90742073	yes	INT005756	3640	3640	NA	0	0	4	11	0	0	0	0	20	0	0	0	14	4	5	0	0	ruminants birds	NA	ERS3415273 (SAMEA5611083)
PL015122	Plate 12	P160719	UZ2004463	MBO013AVN5	avian	w_avian	wildlife	MBO013	13/10/2015	MBOTELA	240	5	-1.298876667	36.86243	yes	PL015122	3576	3576	NA	0	0	7	0	0	0	0	0	0	0	0	0	0	0	0	0	0	ruminants	NA	ERS3415497 (SAMEA5611308)
PLQ2168	Plate 18	P160773	UZ030385	KTS088AVN14	avian	w_avian	wildlife	KTS088	05/09/2016	KITISURU	110	1	-1.232017083	36.75897979	yes	PLQ2168	3576	3576	NA	0	4	0	0	0	0	0	0	7	5	0	6	7	0	0	0	0	ruminants birds	NA	ERS3415590 (SAMEA5611401)
INT004799	Plate 06	P160465	UZ027281	KRR039GAL3	chickens	poultry	livestock	KRR039	22/02/2016	KARURA	120	2	-1.224276667	36.82658833	yes	INT004799	3572	3572	NA	0	0	0	0	0	0	0	0	0	0	700	0	0	0	0	0	0	birds	NA	ERS3415146 (SAMEA5610956)
INT004194	Plate 09	P160554	UZ026939	DAN031GAL1	chickens	poultry	livestock	DAN031	11/01/2016	DANDORA 'B'	313	6	-1.241636667	36.90821167	yes	INT004194	3525	3525	NA	0	9	0	0	0	0	0	0	13	0	0	0	0	0	0	0	0	ruminants birds	NA	ERS3415059 (SAMEA5610869)
INT005113	Plate 05	P160465	UZ027671	EAS043GAL2	chickens	poultry	livestock	EAS043	14/03/2016	EASTLEIGH NORTH	330	5	-1.266996667	36.84912833	yes	INT005113	3519	3519	NA	0	0	0	0	0	0	0	0	8	0	0	0	0	0	0	0	0	birds	NA	ERS3415187 (SAMEA5610997)
INT008004	Plate 08	P160553	UZ029173	KAS062HUM3	human	human	human	KAS062	17/05/2016	KASARANI	321	5	-1.21818802	36.9035827	no	INT008004	3478	3478	NA	0	0	0	0	0	0	0	0	0	0	0	0	0	0	0	0	0	none	NA	ERS3415426 (SAMEA5611237)
ALQ020003	Plate 12	P160719	UZ026756	KYL026AVN7	avian	w_avian	wildlife	KYL026	24/11/2015	KAYOLE	313	6	-1.276371667	36.920625	yes	ALQ020003	3288	3288	NA	0	0	0	0	0	14	0	0	40	0	0	0	0	0	0	0	0	monogastrics birds	NA	ERS3414806 (SAMEA5610616)
ALQ032797	Plate 18	P160773	UZ030157	MUT084GAL1	chickens	poultry	livestock	MUT084	17/08/2016	MUTHANGARI	110	2	-1.265065	36.78292	yes	ALQ032797	3274	3274	NA	0	0	0	2	0	0	0	0	2	0	0	0	0	0	0	0	0	ruminants birds	NA	ERS3414931 (SAMEA5610741)
TMP021240	Plate 13	P160720	UZ022112	GWK076GAL3	chickens	poultry	livestock	GWK076	19/07/2016	GATWIKIRA	312	7	-1.31708	36.77864167	yes	TMP021240	3274	3274	NA	0	0	0	0	0	20	0	0	0	0	16	0	0	0	0	0	0	monogastrics birds	NA	ERS3416064 (SAMEA5611875)
INT000311	Plate 01	P160078	UZ025645	KAN008GAL6	chickens	poultry	livestock	KAN008	22/09/2015	KAREN	110	1	-1.338961667	36.70231333	yes	INT000311	3270	3270	NA	0	0	0	0	0	0	0	0	140	0	0	0	0	0	0	0	0	birds	NA	ERS3414989 (SAMEA5610799)
INT007974	Plate 07	P160553	UZ028879	KAS061AVN3	avian	w_avian	wildlife	KAS061	16/05/2016	KASARANI	321	5	-1.223748333	36.92381333	yes	INT007974	3234	3234	NA	0	0	3	0	0	10	0	0	9	0	0	0	0	0	0	0	0	ruminants monogastrics birds	NA	ERS3415422 (SAMEA5611233)
INT005447	Plate 06	P160465	UZ028056	STC048HUM2	human	human	human	STC048	30/03/2016	SOUTH C	211	3	-1.324195	36.82088333	no	INT005447	3168	3168	NA	0	0	0	0	0	0	0	0	0	0	0	0	0	0	0	0	0	none	NA	ERS3415230 (SAMEA5611040)
TMP016496	Plate 02	P160078	UZ025660	KAN008HUM3	human	human	human	KAN008	22/09/2015	KAREN	110	1	-1.338961667	36.70231333	yes	TMP016496	3168	3168	NA	0	0	0	0	0	0	0	0	140	0	0	0	0	0	0	0	0	birds	NA	ERS3415743 (SAMEA5611554)
ALQ034639	Plate 11	P160719	UZ030187	EMB085COL2	pigeons	poultry	livestock	EMB085	22/08/2016	EMBAKASI	211	4	-1.311076667	36.89346167	yes	ALQ034639	3107	3107	NA	0	0	0	0	0	0	0	0	300	0	0	0	0	0	0	26	0	birds	NA	ERS3414945 (SAMEA5610755)
INT005421	Plate 05	P160465	UZ2004898	STC047ROD1	rodent	w_mammal	wildlife	STC047	22/03/2016	SOUTH C	211	3	-1.325503333	36.82077667	yes	INT005421	3107	3107	NA	0	0	0	0	0	0	0	0	6	0	0	0	0	0	0	0	0	birds	NA	ERS3415226 (SAMEA5611036)
TMP019232	Plate 04	P160305	UZ2004402	MAK018AVN4	avian	w_avian	wildlife	MAK018	27/10/2015	MAKONGENI	230	6	-1.296248	36.851973	no	TMP019232	3107	3107	NA	0	0	0	0	0	0	0	0	0	0	0	0	0	0	0	0	0	none	NA	ERS3415848 (SAMEA5611659)
TMP018417	Plate 08	P160553	UZ026592	KYL026SUI7	pig	monogastric	livestock	KYL026	24/11/2015	KAYOLE	313	6	-1.276371667	36.920625	yes	TMP018417	3107*	3107	NA	0	0	0	0	0	14	0	0	40	0	0	0	0	0	0	0	0	monogastrics birds	NA	ERS3415801 (SAMEA5611612)
INT004664	Plate 06	P160465	UZ027253	KRR037GAL4	chickens	poultry	livestock	KRR037	09/02/2016	KARURA	120	2	-1.215838333	36.8016	yes	INT004664	3057	3057	NA	0	5	0	0	0	0	0	0	6	250	0	0	0	0	0	0	0	ruminants birds	NA	ERS3415127 (SAMEA5610937)
INT007856	Plate 07	P160553	UZ028653	KAS061AVN5	avian	w_avian	wildlife	KAS061	16/05/2016	KASARANI	321	5	-1.223748333	36.92381333	yes	INT007856	3057	3057	NA	0	0	3	0	0	10	0	0	9	0	0	0	0	0	0	0	0	ruminants monogastrics birds	NA	ERS3415405 (SAMEA5611216)
INT007857	Plate 07	P160553	UZ028884	KAS061AVN4	avian	w_avian	wildlife	KAS061	16/05/2016	KASARANI	321	5	-1.223748333	36.92381333	yes	INT007857	3057	3057	NA	0	0	3	0	0	10	0	0	9	0	0	0	0	0	0	0	0	ruminants monogastrics birds	NA	ERS3415406 (SAMEA5611217)
TMP020519	Plate 10	P160554	UZ029985	KWG070CAP1	goat	ruminant	livestock	KWG070	04/07/2016	KAWANGWARE	260	6	-1.278915	36.74525167	yes	TMP020519	3042	3042	NA	0	1	22	0	25	0	0	0	0	0	0	0	0	0	0	0	0	ruminants	NA	ERS3415974 (SAMEA5611785)
PLQ000525	Plate 13	P160720	UZ030035	NGN079HUM3	human	human	human	NGN079	08/08/2016	NGUNDU	270	5	-1.268731667	37.06599	yes	PLQ000525	3033	3033	NA	6	0	0	0	10	0	0	0	3	0	0	0	0	0	0	0	0	ruminants birds other	NA	ERS3415530 (SAMEA5611341)
TMP019349	Plate 12	P160719	UZ2004520	KIG019AVN4	avian	w_avian	wildlife	KIG019	02/11/2015	KIRIGU	260	6	-1.291726667	36.70118333	yes	TMP019349	3033	3033	NA	0	0	16	0	0	2	0	0	5	0	0	0	0	0	0	0	0	ruminants monogastrics birds	NA	ERS3415863 (SAMEA5611674)
TMP016200	Plate 01	P160078	UZ025569	MSA006HUM1	human	human	human	MSA006	15/09/2015	MOWLEM = SAIKA	313	6	-1.256981667	36.90746667	yes	TMP016200	2967	2967	NA	0	0	0	0	0	0	0	0	15	0	0	0	0	0	0	0	0	birds other	NA	ERS3415708 (SAMEA5611519)
ALQ019610	Plate 03	P160305	UZ026576	KYL025HUM7	human	human	human	KYL025	16/11/2015	KAYOLE	313	6	-1.265657435	36.91767563	yes	ALQ019610	2936	2936	NA	0	1	14	0	0	0	0	0	0	0	0	2	0	0	0	0	0	ruminants birds	NA	ERS3414756 (SAMEA5610566)
TWAG1891	Plate 17	P160773	UZ030849	BOM092GAL1	chickens	poultry	livestock	BOM092	14/09/2016	BOMAS	211	3	-1.323251667	36.77964333	yes	TWAG1891	2935	2935	NA	0	0	13	0	0	0	0	0	10	0	0	0	0	0	0	0	0	ruminants birds	NA	ERS3416287 (SAMEA5612099)
TMP023569	Plate 13	P160720	UZ030275	EMB085HUM10	human	human	human	EMB085	22/08/2016	EMBAKASI	211	4	-1.311076667	36.89346167	yes	TMP023569	2914	2914	NA	0	0	0	0	0	0	0	0	300	0	0	0	0	0	0	26	0	birds	NA	ERS3416141 (SAMEA5611953)
TMP016369	Plate 01	P160078	UZ025217	MSA004SUI1	pig	monogastric	livestock	MSA004	14/09/2015	MOWLEM = SAIKA	311	6	-1.245281667	36.92033333	yes	TMP016369	2852	2852	NA	0	5	0	0	0	7	4	0	20	0	0	0	0	0	0	0	0	ruminants monogastrics birds other	NA	ERS3415727 (SAMEA5611538)
TMP024062	Plate 18	P160773	UZ030958	LOR097HUM11	human	human	human	LOR097	27/09/2016	LORESHO	110	1	-1.247168333	36.764595	yes	TMP024062	2852	2852	NA	0	0	0	0	0	0	0	0	13	0	0	0	0	16	0	0	0	birds	NA	ERS3416182 (SAMEA5611994)
ALQ023198	Plate 07	P160553	UZ027607	SPV064AVN11	avian	w_avian	wildlife	SPV064	23/05/2016	SPRING VALLEY	110	2	-1.253818333	36.790205	yes	ALQ023198	2813	2813	NA	0	1	0	3	5	0	6	0	4	0	0	0	3	0	1	0	0	ruminants monogastrics birds	NA	ERS3414865 (SAMEA5610675)
TMP019975	Plate 01	P160078	UZ026048	MAK017AVN5	avian	w_avian	wildlife	MAK017	27/10/2015	MAKONGENI	230	6	-1.298248333	36.84727333	yes	TMP019975	2800	2800	NA	0	0	0	0	0	0	5	1	30	0	0	0	0	0	0	0	0	monogastrics birds	NA	ERS3415940 (SAMEA5611751)
ALQ019802	Plate 11	P160719	UZ2004629	KYL027AVN2	avian	w_avian	wildlife	KYL027	17/11/2015	KAYOLE	313	6	-1.273571667	36.91366667	no	ALQ019802	2792	2792	NA	0	0	0	0	0	0	0	0	0	0	0	0	0	0	0	0	0	none	NA	ERS3414777 (SAMEA5610587)
INT004943	Plate 10	P160554	UZ027486	KIL040HUM1	human	human	human	KIL040	06/03/2016	KILIMANI	250	2	-1.28747084	36.7921127	no	INT004943	2772	2772	NA	0	0	0	0	0	0	0	0	0	0	0	0	0	0	0	0	0	none	NA	ERS3415165 (SAMEA5610975)
TMP019828	Plate 02	P160078	UZ026389	MLK023CAP2	goat	ruminant	livestock	MLK023	10/11/2015	MLANGO KUBWA	312	7	-1.264538333	36.85216167	yes	TMP019828	2758	2758	NA	0	26	2	0	4	0	0	0	0	0	0	0	0	0	0	0	0	ruminants	NA	ERS3415920 (SAMEA5611731)
TMP019928	Plate 15	P160810	UZ2004560	MLK024AVN7	avian	w_avian	wildlife	MLK024	11/11/2015	MLANGO KUBWA	312	7	-1.26418	36.85309167	yes	TMP019928	2758	2758	NA	0	0	0	0	0	0	0	0	8	0	0	7	0	0	0	0	0	birds	NA	ERS3415933 (SAMEA5611744)
PLQ000886	Plate 15	P160810	UZ022168	MUT082BOV2	bovine	ruminant	livestock	MUT082	15/08/2016	MUTHANGARI	110	2	-1.2663	36.782315	yes	PLQ000886	2739	2739	NA	0	2	0	1	0	0	3	0	13	0	0	0	0	0	0	0	0	ruminants monogastrics birds	NA	ERS3415572 (SAMEA5611383)
ALQ019632	Plate 04	P160305	UZ026657	KYL025CAP4	goat	ruminant	livestock	KYL025	16/11/2015	KAYOLE	313	6	-1.265657435	36.91767563	yes	ALQ019632	2728	2728	NA	0	1	14	0	0	0	0	0	0	0	0	2	0	0	0	0	0	ruminants birds	NA	ERS3414759 (SAMEA5610569)
INT005729	Plate 05	P160465	UZ027397	KHW050AVN2	avian	w_avian	wildlife	KHW050	06/04/2016	KAHAWA WEST / JUJA K	311	6	-1.179393235	36.90742073	yes	INT005729	2722	2722	NA	0	0	4	11	0	0	0	0	20	0	0	0	14	4	5	0	0	ruminants birds	NA	ERS3415269 (SAMEA5611079)
TMP022415	Plate 14	P160720	UZ022038	GTN073AVN5	avian	w_avian	wildlife	GTN073	12/07/2016	GATINA	260	6	-1.27637736	36.75747462	yes	TMP022415	2722	2722	NA	0	4	0	0	0	0	0	0	6	0	0	0	0	0	0	0	0	ruminants birds	NA	ERS3416116 (SAMEA5611928)
ALQ035001	Plate 21	P170066	UZ030961	LOR098GAL2	chickens	poultry	livestock	LOR098	28/09/2016	LORESHO	120	1	-1.24741938	36.7508106	yes	ALQ035001	2705	2705	NA	0	0	3	0	1	0	0	0	21	14	0	2	0	0	0	0	0	ruminants birds	NA	ERS3414978 (SAMEA5610788)
INT004883	Plate 05	P160465	UZ027513	KIL041MEL1	turkeys	poultry	livestock	KIL041	08/03/2016	KILIMANI	110	2	-1.291786185	36.78376162	yes	INT004883	2705	2705	NA	0	0	0	3	3	0	33	0	167	0	0	6	3	4	6	0	0	ruminants monogastrics birds	NA	ERS3415157 (SAMEA5610967)
INT005917	Plate 06	P160465	UZ027417	LUM052AVN6	avian	w_avian	wildlife	LUM052	11/04/2016	LUMUMBA (JERICHO)	220	6	-1.291	36.868835	no	INT005917	2705	2705	NA	0	0	0	0	0	0	0	0	0	0	0	0	0	0	0	0	0	none	NA	ERS3415292 (SAMEA5611102)
PL015111	Plate 11	P160719	UZ025307	MBO014ROD1	rodent	w_mammal	wildlife	MBO014	12/10/2015	MBOTELA	240	5	-1.298803333	36.86333833	yes	PL015111	2705	2705	NA	0	0	0	0	0	0	3	3	12	0	0	8	0	3	0	0	0	monogastrics birds	NA	ERS3415495 (SAMEA5611306)
TMP016857	Plate 02	P160078	UZ025627	KAN007HUM5	human	human	human	KAN007	21/09/2015	KAREN	110	1	-1.360794419	36.71998186	yes	TMP016857	2705	2705	NA	0	6	0	0	0	0	0	0	0	0	0	0	2	0	0	0	0	ruminants birds other	NA	ERS3415769 (SAMEA5611580)
TMP017039	Plate 02	P160078	UZ025891	MBO014HUM1	human	human	human	MBO014	12/10/2015	MBOTELA	240	5	-1.298803333	36.86333833	yes	TMP017039	2705	2705	NA	0	0	0	0	0	0	3	3	12	0	0	8	0	3	0	0	0	monogastrics birds	NA	ERS3415781 (SAMEA5611592)
TMP020429	Plate 07	P160553	UZ029603	MIH067NUM6	guinea_fowl	poultry	livestock	MIH067	07/06/2016	MIHANGO	270	5	-1.273335	36.944275	yes	TMP020429	2705	2705	NA	0	3	0	0	0	0	0	0	30	0	0	0	0	11	0	0	0	ruminants birds	NA	ERS3415963 (SAMEA5611774)
TMP020842	Plate 16	P160810	UZ029443	GTN075AVN3	avian	w_avian	wildlife	GTN075	13/07/2016	GATINA	260	6	-1.275552495	36.75860432	no	TMP020842	2705	2705	NA	0	0	0	0	0	0	0	0	0	0	0	0	0	0	0	0	0	none	NA	ERS3416005 (SAMEA5611816)
TMP021820	Plate 16	P160810	UZ028135	KHW049GAL7	chickens	poultry	livestock	KHW049	05/04/2016	KAHAWA WEST / JUJA K	311	6	-1.179655	36.90618833	yes	TMP021820	2705	2705	NA	0	5	0	0	0	0	0	0	18	0	0	0	0	0	0	0	0	ruminants birds	NA	ERS3416102 (SAMEA5611913)
TMP024102	Plate 19	P160812	UZ030941	LOR097HUM1	human	human	human	LOR097	27/09/2016	LORESHO	110	1	-1.247168333	36.764595	yes	TMP024102	2705	2705	NA	0	0	0	0	0	0	0	0	13	0	0	0	0	16	0	0	0	birds	NA	ERS3416188 (SAMEA5612000)
TWAG1962	Plate 18	P160773	UZ035204	BOM091ROD2	rodent	w_mammal	wildlife	BOM091	13/09/2016	BOMAS	211	3	-1.320306667	36.78094667	yes	TWAG1962	2705	2705	NA	0	0	0	0	0	0	2	0	15	0	0	0	2	3	2	0	3	monogastrics birds	NA	ERS3416299 (SAMEA5612111)
ALQ034661	Plate 11	P160719	UZ030179	EMB085COL3	pigeons	poultry	livestock	EMB085	22/08/2016	EMBAKASI	211	4	-1.311076667	36.89346167	yes	ALQ034661	2622	2622	NA	0	0	0	0	0	0	0	0	300	0	0	0	0	0	0	26	0	birds	NA	ERS3414948 (SAMEA5610758)
INT005898	Plate 09	P160554	UZ027342	LUM054ROD1	rodent	w_mammal	wildlife	LUM054	13/04/2016	LUMUMBA (JERICHO)	220	6	-1.293103333	36.871635	yes	INT005898	2622	2622	NA	0	0	44	0	0	0	0	0	5	0	0	12	0	0	0	0	0	ruminants birds	NA	ERS3415290 (SAMEA5611100)
INT007120	Plate 06	P160465	UZ028344	LUM054ANA2	ducks	poultry	livestock	LUM054	13/04/2016	LUMUMBA (JERICHO)	220	6	-1.293103333	36.871635	yes	INT007120	2622	2622	NA	0	0	44	0	0	0	0	0	5	0	0	12	0	0	0	0	0	ruminants birds	NA	ERS3415329 (SAMEA5611139)
INT007371	Plate 09	P160554	UZ028599	MWK056CAP2	goat	ruminant	livestock	MWK056	03/05/2016	MWIKI	313	6	-1.231583333	36.93017333	yes	INT007371	2622	2622	NA	0	0	4	0	0	10	0	0	0	0	0	7	0	0	0	0	0	ruminants monogastrics birds	NA	ERS3415337 (SAMEA5611147)
TMP023356	Plate 18	P160773	UZ030190	EMB085GAL6	chickens	poultry	livestock	EMB085	22/08/2016	EMBAKASI	211	4	-1.311076667	36.89346167	yes	TMP023356	2622	2622	NA	0	0	0	0	0	0	0	0	300	0	0	0	0	0	0	26	0	birds	NA	ERS3416129 (SAMEA5611941)
INT010138	Plate 18	P160773	UZ030840	SPV100HUM2	human	human	human	SPV100	05/10/2016	SPRING VALLEY	110	2	-1.254815	36.77469833	yes	INT010138	2617	2617	NA	0	0	0	0	0	0	4	0	1	0	0	9	4	1	1	70	0	monogastrics birds	NA	ERS3415475 (SAMEA5611286)
ALQ023188	Plate 08	P160553	UZ027618	KAS063CAP3	goat	ruminant	livestock	KAS063	18/05/2016	KASARANI	321	5	-1.22741664	36.92116014	yes	ALQ023188	2614	2614	NA	0	0	0	5	0	0	0	0	5	0	0	0	0	0	0	0	0	ruminants birds	NA	ERS3414864 (SAMEA5610674)
PLQ000667	Plate 14	P160720	UZ022167	NGN080ANA2	ducks	poultry	livestock	NGN080	09/08/2016	NGUNDU	270	5	-1.27306	37.05743667	yes	PLQ000667	2614	2614	NA	0	0	4	0	3	0	0	0	115	0	0	4	0	0	0	0	0	ruminants birds	NA	ERS3415552 (SAMEA5611363)
PLQ2265	Plate 16	P160810	UZ030506	KTS088ANA5	ducks	poultry	livestock	KTS088	05/09/2016	KITISURU	110	1	-1.232017083	36.75897979	yes	PLQ2265	2614	2614	NA	0	4	0	0	0	0	0	0	7	5	0	6	7	0	0	0	0	ruminants birds	NA	ERS3415604 (SAMEA5611415)
TMP022768	Plate 13	P160720	UZ022166	NGN080OVN1	sheep	ruminant	livestock	NGN080	09/08/2016	NGUNDU	270	5	-1.27306	37.05743667	yes	TMP022768	2614	2614	NA	0	0	4	0	3	0	0	0	115	0	0	4	0	0	0	0	0	ruminants birds	NA	ERS3416124 (SAMEA5611936)
TMP015093	Plate 10	P160554	UZ025538	MSA004LAG1	rabbit	monogastric	livestock	MSA004	14/09/2015	MOWLEM = SAIKA	311	6	-1.245281667	36.92033333	yes	TMP015093	2612	2612	NA	0	5	0	0	0	7	4	0	20	0	0	0	0	0	0	0	0	ruminants monogastrics birds other	NA	ERS3415643 (SAMEA5611454)
TMP019369	Plate 11	P160719	UZ2004522	KIG019AVN7	avian	w_avian	wildlife	KIG019	02/11/2015	KIRIGU	260	6	-1.291726667	36.70118333	yes	TMP019369	2598	2598	NA	0	0	16	0	0	2	0	0	5	0	0	0	0	0	0	0	0	ruminants monogastrics birds	NA	ERS3415866 (SAMEA5611677)
TMP021043	Plate 13	P160720	UZ022319	GTN074GAL3	chickens	poultry	livestock	GTN074	13/07/2016	GATINA	260	6	-1.291341667	36.75221	yes	TMP021043	2598	2598	NA	0	0	0	0	3	0	0	0	7	0	0	0	0	0	0	0	0	ruminants birds	NA	ERS3416035 (SAMEA5611846)
INT004792	Plate 09	P160554	UZ027289	KRR039GAL6	chickens	poultry	livestock	KRR039	22/02/2016	KARURA	120	2	-1.224276667	36.82658833	yes	INT004792	2541	2541	NA	0	0	0	0	0	0	0	0	0	0	700	0	0	0	0	0	0	birds	NA	ERS3415145 (SAMEA5610955)
INT005125	Plate 05	P160465	UZ027675	EAS043GAL3	chickens	poultry	livestock	EAS043	14/03/2016	EASTLEIGH NORTH	330	5	-1.266996667	36.84912833	yes	INT005125	2541	2541	NA	0	0	0	0	0	0	0	0	8	0	0	0	0	0	0	0	0	birds	NA	ERS3415188 (SAMEA5610998)
INT004653	Plate 05	P160465	UZ2004785	KRR037AVN6	avian	w_avian	wildlife	KRR037	09/02/2016	KARURA	120	2	-1.215838333	36.8016	yes	INT004653	2540	2540	NA	0	5	0	0	0	0	0	0	6	250	0	0	0	0	0	0	0	ruminants birds	NA	ERS3415125 (SAMEA5610935)
INT003527	Plate 15	P160810	UZ027115	UMJ035GAL5	chickens	poultry	livestock	UMJ035	26/01/2016	UMOJA	212	4	-1.282928333	36.88523333	yes	INT003527	2539	2539	NA	0	0	0	0	0	0	0	0	15	0	0	0	0	0	0	0	0	birds	NA	ERS3415030 (SAMEA5610840)
ALQ035074	Plate 21	P170066	UZ030305	MGM095AVN2	avian	w_avian	wildlife	MGM095	20/09/2016	MUGUMOINI	212	4	-1.32085454	36.7856738	no	ALQ035074	2531	2531	NA	0	0	0	0	0	0	0	0	0	0	0	0	0	0	0	0	0	none	NA	ERS3414979 (SAMEA5610789)
TMP019742	Plate 01	P160078	UZ026375	MLK022HUM3	human	human	human	MLK022	09/11/2015	MLANGO KUBWA	312	7	-1.265345	36.85309833	no	TMP019742	2526	2526	NA	0	0	0	0	0	0	0	0	0	0	0	0	0	0	0	0	0	none	NA	ERS3415909 (SAMEA5611720)
ALQ017277	Plate 09	P160554	UZ025718	HAR011GAL7	chickens	poultry	livestock	HAR011	05/10/2015	HARAMBEE	211	3	-1.287711667	36.87792167	yes	ALQ017277	2522	2522	NA	0	0	0	0	0	0	40	0	0	0	0	0	0	0	0	0	0	monogastrics birds	NA	ERS3414681 (SAMEA5610491)
ALQ019870	Plate 03	P160305	UZ026785	KYL026GAL1	chickens	poultry	livestock	KYL026	24/11/2015	KAYOLE	313	6	-1.276371667	36.920625	yes	ALQ019870	2522	2522	NA	0	0	0	0	0	14	0	0	40	0	0	0	0	0	0	0	0	monogastrics birds	NA	ERS3414789 (SAMEA5610599)
ALQ028331	Plate 16	P160810	UZ028656	KOR059ROD3	rodent	w_mammal	wildlife	KOR059	10/05/2016	NYAYO (KOROGOCHO)	312	7	-1.253945	36.88923667	yes	ALQ028331	2522	2522	NA	0	0	0	0	0	10	0	0	0	0	0	0	0	0	0	0	0	monogastrics	NA	ERS3414905 (SAMEA5610715)
ALQ028714	Plate 12	P160719	UZ029275	KAS063GAL3	chickens	poultry	livestock	KAS063	18/05/2016	KASARANI	321	5	-1.22741664	36.92116014	yes	ALQ028714	2522	2522	NA	0	0	0	5	0	0	0	0	5	0	0	0	0	0	0	0	0	ruminants birds	NA	ERS3414913 (SAMEA5610723)
INT005601	Plate 06	P160465	UZ028156	KHW049BOV5	bovine	ruminant	livestock	KHW049	05/04/2016	KAHAWA WEST / JUJA K	311	6	-1.179655	36.90618833	yes	INT005601	2522	2522	NA	0	5	0	0	0	0	0	0	18	0	0	0	0	0	0	0	0	ruminants birds	NA	ERS3415252 (SAMEA5611062)
INT005627	Plate 06	P160465	UZ028069	KHW049AVN1	avian	w_avian	wildlife	KHW049	05/04/2016	KAHAWA WEST / JUJA K	311	6	-1.179655	36.90618833	yes	INT005627	2522	2522	NA	0	5	0	0	0	0	0	0	18	0	0	0	0	0	0	0	0	ruminants birds	NA	ERS3415256 (SAMEA5611066)
INT007962	Plate 08	P160553	UZ028560	KAS061HUM3	human	human	human	KAS061	16/05/2016	KASARANI	321	5	-1.223748333	36.92381333	yes	INT007962	2522	2522	NA	0	0	3	0	0	10	0	0	9	0	0	0	0	0	0	0	0	ruminants monogastrics birds	NA	ERS3415420 (SAMEA5611231)
ALQ020166	Plate 11	P160719	UZ026696	UTH028AVN8	avian	w_avian	wildlife	UTH028	30/11/2015	UTHIRU	260	6	-1.263931667	36.70259	yes	ALQ020166	2521	2521	NA	0	7	0	0	0	0	0	0	0	0	0	0	0	0	0	0	0	ruminants	NA	ERS3414829 (SAMEA5610639)
INT007083	Plate 06	P160465	UZ028357	LUM054GAL2	chickens	poultry	livestock	LUM054	13/04/2016	LUMUMBA (JERICHO)	220	6	-1.293103333	36.871635	yes	INT007083	2521	2521	NA	0	0	44	0	0	0	0	0	5	0	0	12	0	0	0	0	0	ruminants birds	NA	ERS3415324 (SAMEA5611134)
TMP016150	Plate 12	P160719	UZ025343	VIW002AVN2	avian	w_avian	wildlife	VIW002	01/09/2015	VIWANDANI	312	7	-1.309915	36.878755	yes	TMP016150	2521	2521	NA	0	3	0	0	0	15	3	0	5	0	0	0	0	0	0	0	0	ruminants monogastrics birds	NA	ERS3415703 (SAMEA5611514)
PL015056	Plate 01	P160078	UZ025893	MBO013CAP6	goat	ruminant	livestock	MBO013	13/10/2015	MBOTELA	240	5	-1.298876667	36.86243	yes	PL015056	2517	2517	NA	0	0	7	0	0	0	0	0	0	0	0	0	0	0	0	0	0	ruminants	NA	ERS3415486 (SAMEA5611297)
TMP023454	Plate 13	P160720	UZ030257	EMB085HUM3	human	human	human	EMB085	22/08/2016	EMBAKASI	211	4	-1.311076667	36.89346167	yes	TMP023454	2461	2461	NA	0	0	0	0	0	0	0	0	300	0	0	0	0	0	0	26	0	birds	NA	ERS3416135 (SAMEA5611947)
TMP019534	Plate 03	P160305	UZ026202	KIG020CAP2	goat	ruminant	livestock	KIG020	03/11/2015	KIRIGU	260	6	-1.29399	36.704215	yes	TMP019534	2389	2389	NA	0	3	2	0	0	0	0	0	3	0	0	0	0	0	0	0	0	ruminants birds	NA	ERS3415888 (SAMEA5611699)
TMP015184	Plate 09	P160554	UZ025541	MSA004LAG4	rabbit	monogastric	livestock	MSA004	14/09/2015	MOWLEM = SAIKA	311	6	-1.245281667	36.92033333	yes	TMP015184	2387	2387	NA	0	5	0	0	0	7	4	0	20	0	0	0	0	0	0	0	0	ruminants monogastrics birds other	NA	ERS3415654 (SAMEA5611465)
ALQ019705	Plate 21	P170066	UZ026580	KYL027HUM3	human	human	human	KYL027	17/11/2015	KAYOLE	313	6	-1.273571667	36.91366667	no	ALQ019705	2351	2351	NA	0	0	0	0	0	0	0	0	0	0	0	0	0	0	0	0	0	none	NA	ERS3414767 (SAMEA5610577)
ALQ019749	Plate 03	P160305	UZ026610	KYL027HUM4	human	human	human	KYL027	17/11/2015	KAYOLE	313	6	-1.273571667	36.91366667	no	ALQ019749	2351	2351	NA	0	0	0	0	0	0	0	0	0	0	0	0	0	0	0	0	0	none	NA	ERS3414771 (SAMEA5610581)
TWAG1723	Plate 18	P160773	UZ030587	BOM091GAL3	chickens	poultry	livestock	BOM091	13/09/2016	BOMAS	211	3	-1.320306667	36.78094667	yes	TWAG1723	2351	2351	NA	0	0	0	0	0	0	2	0	15	0	0	0	2	3	2	0	3	monogastrics birds	NA	ERS3416260 (SAMEA5612072)
TWAG1772	Plate 18	P160773	UZ030606	BOM091GAL4	chickens	poultry	livestock	BOM091	13/09/2016	BOMAS	211	3	-1.320306667	36.78094667	yes	TWAG1772	2351	2351	NA	0	0	0	0	0	0	2	0	15	0	0	0	2	3	2	0	3	monogastrics birds	NA	ERS3416267 (SAMEA5612079)
TWAG1967	Plate 18	P160773	UZ030299	MGM095AVN4	avian	w_avian	wildlife	MGM095	20/09/2016	MUGUMOINI	212	4	-1.32085454	36.7856738	no	TWAG1967	2351	2351	NA	0	0	0	0	0	0	0	0	0	0	0	0	0	0	0	0	0	none	NA	ERS3416300 (SAMEA5612112)
TMP020733	Plate 10	P160554	UZ028794	KWG071OVN2	sheep	ruminant	livestock	KWG071	05/07/2016	KAWANGWARE	260	6	-1.280645	36.74687667	yes	TMP020733	2328	2328	NA	0	0	22	0	3	1	2	0	0	0	0	0	3	0	2	0	0	ruminants monogastrics birds	NA	ERS3415987 (SAMEA5611798)
ALQ018502	Plate 04	P160305	UZ2004429	MAK017AVN9	avian	w_avian	wildlife	MAK017	27/10/2015	MAKONGENI	230	6	-1.298248333	36.84727333	yes	ALQ018502	2325	2325	NA	0	0	0	0	0	0	5	1	30	0	0	0	0	0	0	0	0	monogastrics birds	NA	ERS3414696 (SAMEA5610506)
INT004388	Plate 13	P160720	UZ2004756	DANDUMPAV_POP7	av_pop	w_avian	wildlife	DANDUMP	NA	NA	NA	NA	NA	NA	NA	INT004388	2325	2325	NA	NA	NA	NA	NA	NA	NA	NA	NA	NA	NA	NA	NA	NA	NA	NA	NA	NA	NA	NA	ERS3415087 (SAMEA5610897)
INT007815	Plate 08	P160553	UZ028903	KOR060HUM1	human	human	human	KOR060	11/05/2016	NYAYO (KOROGOCHO)	312	7	-1.251918333	36.89265167	no	INT007815	2325	2325	NA	0	0	0	0	0	0	0	0	0	0	0	0	0	0	0	0	0	none	NA	ERS3415400 (SAMEA5611211)
TMP020445	Plate 15	P160810	UZ029519	MIH067GAL1	chickens	poultry	livestock	MIH067	07/06/2016	MIHANGO	270	5	-1.273335	36.944275	yes	TMP020445	2325	2325	NA	0	3	0	0	0	0	0	0	30	0	0	0	0	11	0	0	0	ruminants birds	NA	ERS3415966 (SAMEA5611777)
ALQ018881	Plate 08	P160553	UZ026049	MAK017GAL5	chickens	poultry	livestock	MAK017	27/10/2015	MAKONGENI	230	6	-1.298248333	36.84727333	yes	ALQ018881	2309	2309	NA	0	0	0	0	0	0	5	1	30	0	0	0	0	0	0	0	0	monogastrics birds	NA	ERS3414712 (SAMEA5610522)
ALQ019005	Plate 10	P160554	UZ026054	MAK017GAL8	chickens	poultry	livestock	MAK017	27/10/2015	MAKONGENI	230	6	-1.298248333	36.84727333	yes	ALQ019005	2309	2309	NA	0	0	0	0	0	0	5	1	30	0	0	0	0	0	0	0	0	monogastrics birds	NA	ERS3414722 (SAMEA5610532)
ALQ028321	Plate 21	P170066	UZ028624	MWK057AVN5	avian	w_avian	wildlife	MWK057	05/05/2016	MWIKI	313	6	-1.229788913	36.92984478	yes	ALQ028321	2280	2280	NA	0	0	4	0	0	11	0	0	4	0	0	16	0	0	0	0	0	ruminants monogastrics birds	NA	ERS3414904 (SAMEA5610714)
INT010049	Plate 17	P160773	UZ035252	SPV100ROD3	rodent	w_mammal	wildlife	SPV100	05/10/2016	SPRING VALLEY	110	2	-1.254815	36.77469833	yes	INT010049	2280	2280	NA	0	0	0	0	0	0	4	0	1	0	0	9	4	1	1	70	0	monogastrics birds	NA	ERS3415460 (SAMEA5611271)
TMP016019	Plate 04	P160305	UZ025190	VIW002GAL4	chickens	poultry	livestock	VIW002	01/09/2015	VIWANDANI	312	7	-1.309915	36.878755	yes	TMP016019	2280	2280	NA	0	3	0	0	0	15	3	0	5	0	0	0	0	0	0	0	0	ruminants monogastrics birds	NA	ERS3415690 (SAMEA5611501)
TMP019244	Plate 12	P160719	UZ2004434	MAK018AVN6	avian	w_avian	wildlife	MAK018	27/10/2015	MAKONGENI	230	6	-1.296248	36.851973	no	TMP019244	2280	2280	NA	0	0	0	0	0	0	0	0	0	0	0	0	0	0	0	0	0	none	NA	ERS3415850 (SAMEA5611661)
TMP020914	Plate 14	P160720	UZ022088	GTN073BOV4	bovine	ruminant	livestock	GTN073	12/07/2016	GATINA	260	6	-1.27637736	36.75747462	yes	TMP020914	2280	2280	NA	0	4	0	0	0	0	0	0	6	0	0	0	0	0	0	0	0	ruminants birds	NA	ERS3416015 (SAMEA5611826)
TMP019432	Plate 21	P170066	UZ026249	KIG020HUM4	human	human	human	KIG020	03/11/2015	KIRIGU	260	6	-1.29399	36.704215	yes	TMP019432	2186	2186	NA	0	3	2	0	0	0	0	0	3	0	0	0	0	0	0	0	0	ruminants birds	NA	ERS3415875 (SAMEA5611686)
INT004261	Plate 04	P160305	UZ027018	DAN032GAL4	chickens	poultry	livestock	DAN032	12/01/2016	DANDORA 'B'	313	6	-1.24761043	36.90650254	yes	INT004261	2178	2178	NA	0	0	0	0	0	0	0	0	53	0	0	0	0	0	0	0	0	birds	NA	ERS3415069 (SAMEA5610879)
INT004497	Plate 10	P160554	UZ026336	UMJ036ROD1	rodent	w_mammal	wildlife	UMJ036	27/01/2016	UMOJA	212	4	-1.278311667	36.88803	yes	INT004497	2178	2178	NA	0	0	5	0	0	0	28	0	24	0	0	0	0	0	3	0	0	ruminants monogastrics birds	NA	ERS3415103 (SAMEA5610913)
TMP016178	Plate 01	P160078	UZ025563	MSA006GAL5	chickens	poultry	livestock	MSA006	15/09/2015	MOWLEM = SAIKA	313	6	-1.256981667	36.90746667	yes	TMP016178	2178	2178	NA	0	0	0	0	0	0	0	0	15	0	0	0	0	0	0	0	0	birds other	NA	ERS3415706 (SAMEA5611517)
ALQ028086	Plate 12	P160719	UZ028345	LUM054CAP8	goat	ruminant	livestock	LUM054	13/04/2016	LUMUMBA (JERICHO)	220	6	-1.293103333	36.871635	yes	ALQ028086	2175	2175	NA	0	0	44	0	0	0	0	0	5	0	0	12	0	0	0	0	0	ruminants birds	NA	ERS3414893 (SAMEA5610703)
PL015044	Plate 02	P160078	UZ025904	MBO013CAP2	goat	ruminant	livestock	MBO013	13/10/2015	MBOTELA	240	5	-1.298876667	36.86243	yes	PL015044	2175	2175	NA	0	0	7	0	0	0	0	0	0	0	0	0	0	0	0	0	0	ruminants	NA	ERS3415484 (SAMEA5611295)
PL015069	Plate 11	P160719	UZ2004462	MBO013AVN4	avian	w_avian	wildlife	MBO013	13/10/2015	MBOTELA	240	5	-1.298876667	36.86243	yes	PL015069	2175	2175	NA	0	0	7	0	0	0	0	0	0	0	0	0	0	0	0	0	0	ruminants	NA	ERS3415488 (SAMEA5611299)
ALQ034634	Plate 12	P160719	UZ030192	EMB085COL1	pigeons	poultry	livestock	EMB085	22/08/2016	EMBAKASI	211	4	-1.311076667	36.89346167	yes	ALQ034634	2165	2165	NA	0	0	0	0	0	0	0	0	300	0	0	0	0	0	0	26	0	birds	NA	ERS3414944 (SAMEA5610754)
INT007954	Plate 07	P160553	UZ028566	KAS061HUM4	human	human	human	KAS061	16/05/2016	KASARANI	321	5	-1.223748333	36.92381333	yes	INT007954	2165	2165	NA	0	0	3	0	0	10	0	0	9	0	0	0	0	0	0	0	0	ruminants monogastrics birds	NA	ERS3415419 (SAMEA5611230)
INT010108	Plate 18	P160773	UZ030668	SPV100COL1	pigeons	poultry	livestock	SPV100	05/10/2016	SPRING VALLEY	110	2	-1.254815	36.77469833	yes	INT010108	2165	2165	NA	0	0	0	0	0	0	4	0	1	0	0	9	4	1	1	70	0	monogastrics birds	NA	ERS3415470 (SAMEA5611281)
TMP020967	Plate 14	P160720	UZ022061	GTN073ROD1	rodent	w_mammal	wildlife	GTN073	12/07/2016	GATINA	260	6	-1.27637736	36.75747462	yes	TMP020967	2165	2165	NA	0	4	0	0	0	0	0	0	6	0	0	0	0	0	0	0	0	ruminants birds	NA	ERS3416024 (SAMEA5611835)
TMP021753	Plate 16	P160810	UZ028145	KHW049GAL5	chickens	poultry	livestock	KHW049	05/04/2016	KAHAWA WEST / JUJA K	311	6	-1.179655	36.90618833	yes	TMP021753	2163	2163	NA	0	5	0	0	0	0	0	0	18	0	0	0	0	0	0	0	0	ruminants birds	NA	ERS3416097 (SAMEA5611908)
INT008756	Plate 21	P170066	UZ030394	KTS088AVN11	avian	w_avian	wildlife	KTS088	05/09/2016	KITISURU	110	1	-1.232017083	36.75897979	yes	INT008756	2144	2144	NA	0	4	0	0	0	0	0	0	7	5	0	6	7	0	0	0	0	ruminants birds	NA	ERS3415442 (SAMEA5611253)
INT010025	Plate 17	P160773	UZ035299	SPV100AVN5	avian	w_avian	wildlife	SPV100	05/10/2016	SPRING VALLEY	110	2	-1.254815	36.77469833	yes	INT010025	2144	2144	NA	0	0	0	0	0	0	4	0	1	0	0	9	4	1	1	70	0	monogastrics birds	NA	ERS3415456 (SAMEA5611267)
INT007587	Plate 08	P160553	UZ028727	MWK057SUI6	pig	monogastric	livestock	MWK057	05/05/2016	MWIKI	313	6	-1.229788913	36.92984478	yes	INT007587	2139	2139	NA	0	0	4	0	0	11	0	0	4	0	0	16	0	0	0	0	0	ruminants monogastrics birds	NA	ERS3415370 (SAMEA5611181)
ALQ028819	Plate 12	P160719	UZ029292	SPV064LAG2	rabbit	monogastric	livestock	SPV064	23/05/2016	SPRING VALLEY	110	2	-1.253818333	36.790205	yes	ALQ028819	2088	2088	NA	0	1	0	3	5	0	6	0	4	0	0	0	3	0	1	0	0	ruminants monogastrics birds	NA	ERS3414916 (SAMEA5610726)
TMP020729	Plate 10	P160554	UZ021986	KWG071CAP4	goat	ruminant	livestock	KWG071	05/07/2016	KAWANGWARE	260	6	-1.280645	36.74687667	yes	TMP020729	2077	2077	NA	0	0	22	0	3	1	2	0	0	0	0	0	3	0	2	0	0	ruminants monogastrics birds	NA	ERS3415986 (SAMEA5611797)
TMP019892	Plate 02	P160078	UZ026495	MLK024HUM1	human	human	human	MLK024	11/11/2015	MLANGO KUBWA	312	7	-1.26418	36.85309167	yes	TMP019892	2076	2076	NA	0	0	0	0	0	0	0	0	8	0	0	7	0	0	0	0	0	birds	NA	ERS3415930 (SAMEA5611741)
TMP021019	Plate 13	P160720	UZ022095	GTN075HUM2	human	human	human	GTN075	13/07/2016	GATINA	260	6	-1.275552495	36.75860432	no	TMP021019	2076	2076	NA	0	0	0	0	0	0	0	0	0	0	0	0	0	0	0	0	0	none	NA	ERS3416031 (SAMEA5611842)
TMP022082	Plate 04	P160305	UZ027975	STC046HUM3	human	human	human	STC046	22/03/2016	SOUTH C	211	3	-1.325046667	36.81989167	yes	TMP022082	2076	2076	NA	0	0	0	0	0	0	0	0	9	0	0	0	0	0	0	0	0	birds	NA	ERS3416108 (SAMEA5611920)
TMP014935	Plate 02	P160078	UZ025328	VIW002SUI6	pig	monogastric	livestock	VIW002	01/09/2015	VIWANDANI	312	7	-1.309915	36.878755	yes	TMP014935	2074	2074	NA	0	3	0	0	0	15	3	0	5	0	0	0	0	0	0	0	0	ruminants monogastrics birds	NA	ERS3415635 (SAMEA5611446)
INT008267	Plate 19	P160812	UZ028790	KWG072HUM1	human	human	human	KWG072	11/07/2016	KAWANGWARE	260	6	-1.281778333	36.74369333	no	INT008267	2073	2073	NA	0	0	0	0	0	0	0	0	0	0	0	0	0	0	0	0	0	none	NA	ERS3415430 (SAMEA5611241)
TMP015475	Plate 10	P160554	UZ025414	MSA004GAL2	chickens	poultry	livestock	MSA004	14/09/2015	MOWLEM = SAIKA	311	6	-1.245281667	36.92033333	yes	TMP015475	2073	2073	NA	0	5	0	0	0	7	4	0	20	0	0	0	0	0	0	0	0	ruminants monogastrics birds other	NA	ERS3415668 (SAMEA5611479)
INT007411	Plate 12	P160719	UZ028340	MWK056SUI2	pig	monogastric	livestock	MWK056	03/05/2016	MWIKI	313	6	-1.231583333	36.93017333	yes	INT007411	2025	2025	NA	0	0	4	0	0	10	0	0	0	0	0	7	0	0	0	0	0	ruminants monogastrics birds	NA	ERS3415343 (SAMEA5611153)
ALQ034717	Plate 18	P160773	UZ035103	EMB085AVN9	avian	w_avian	wildlife	EMB085	22/08/2016	EMBAKASI	211	4	-1.311076667	36.89346167	yes	ALQ034717	2014	2014	NA	0	0	0	0	0	0	0	0	300	0	0	0	0	0	0	26	0	birds	NA	ERS3414954 (SAMEA5610764)
ALQ028161	Plate 12	P160719	UZ028362	LUM054CAP2	goat	ruminant	livestock	LUM054	13/04/2016	LUMUMBA (JERICHO)	220	6	-1.293103333	36.871635	yes	ALQ028161	2008	2008	NA	0	0	44	0	0	0	0	0	5	0	0	12	0	0	0	0	0	ruminants birds	NA	ERS3414899 (SAMEA5610709)
ALQ034949	Plate 18	P160773	UZ035235	MUT082BAT1	bat	w_bat	wildlife	MUT082	15/08/2016	MUTHANGARI	110	2	-1.2663	36.782315	yes	ALQ034949	2005	2005	NA	0	2	0	1	0	0	3	0	13	0	0	0	0	0	0	0	0	ruminants monogastrics birds	NA	ERS3414977 (SAMEA5610787)
PLQ000715	Plate 17	P160773	UZ035062	NGN080AVN10	avian	w_avian	wildlife	NGN080	09/08/2016	NGUNDU	270	5	-1.27306	37.05743667	yes	PLQ000715	2005	2005	NA	0	0	4	0	3	0	0	0	115	0	0	4	0	0	0	0	0	ruminants birds	NA	ERS3415561 (SAMEA5611372)
TMP019863	Plate 01	P160078	UZ026416	MLK023BOV3	bovine	ruminant	livestock	MLK023	10/11/2015	MLANGO KUBWA	312	7	-1.264538333	36.85216167	yes	TMP019863	2005	2005	NA	0	26	2	0	4	0	0	0	0	0	0	0	0	0	0	0	0	ruminants	NA	ERS3415926 (SAMEA5611737)
TMP019611	Plate 16	P160810	UZ026295	KIG021AVN10	avian	w_avian	wildlife	KIG021	03/11/2015	KIRIGU	260	6	-1.288618333	36.69824333	no	TMP019611	1972	1972	NA	0	0	0	0	0	0	0	0	0	0	0	0	0	0	0	0	0	none	NA	ERS3415897 (SAMEA5611708)
ALQ019628	Plate 04	P160305	UZ026664	KYL025BOV1	bovine	ruminant	livestock	KYL025	16/11/2015	KAYOLE	313	6	-1.265657435	36.91767563	yes	ALQ019628	1954	1954	NA	0	1	14	0	0	0	0	0	0	0	0	2	0	0	0	0	0	ruminants birds	NA	ERS3414758 (SAMEA5610568)
TMP019772	Plate 01	P160078	UZ026423	MLK023HUM3	human	human	human	MLK023	10/11/2015	MLANGO KUBWA	312	7	-1.264538333	36.85216167	yes	TMP019772	1861	1861	NA	0	26	2	0	4	0	0	0	0	0	0	0	0	0	0	0	0	ruminants	NA	ERS3415912 (SAMEA5611723)
ALQ023228	Plate 08	P160553	UZ028672	SPV064AVN6	avian	w_avian	wildlife	SPV064	23/05/2016	SPRING VALLEY	110	2	-1.253818333	36.790205	yes	ALQ023228	1851	1851	NA	0	1	0	3	5	0	6	0	4	0	0	0	3	0	1	0	0	ruminants monogastrics birds	NA	ERS3414869 (SAMEA5610679)
INT004557	Plate 10	P160554	UZ027104	UMJ036GAL2	chickens	poultry	livestock	UMJ036	27/01/2016	UMOJA	212	4	-1.278311667	36.88803	yes	INT004557	1844	1844	NA	0	0	5	0	0	0	28	0	24	0	0	0	0	0	3	0	0	ruminants monogastrics birds	NA	ERS3415113 (SAMEA5610923)
TMP015312	Plate 15	P160810	UZ025138	VIW001GAL5	chickens	poultry	livestock	VIW001	31/08/2015	VIWANDANI	312	7	-1.313058333	36.85866167	yes	TMP015312	1844	1844	NA	0	0	0	4	0	0	0	0	200	0	0	0	0	5	0	0	0	ruminants birds	NA	ERS3415664 (SAMEA5611475)
ALQ023259	Plate 21	P170066	UZ029226	SPV064HUM6	human	human	human	SPV064	23/05/2016	SPRING VALLEY	110	2	-1.253818333	36.790205	yes	ALQ023259	1823	1823	NA	0	1	0	3	5	0	6	0	4	0	0	0	3	0	1	0	0	ruminants monogastrics birds	NA	ERS3414874 (SAMEA5610684)
ALQ032813	Plate 13	P160720	UZ030140	MUT083HUM4	human	human	human	MUT083	16/08/2016	MUTHANGARI	110	2	-1.263035	36.79185	no	ALQ032813	1823*	1823	NA	0	0	0	0	0	0	0	0	0	0	0	0	0	0	0	0	0	none	NA	ERS3414932 (SAMEA5610742)
INT010120	Plate 18	P160773	UZ030669	SPV100COL4	pigeons	poultry	livestock	SPV100	05/10/2016	SPRING VALLEY	110	2	-1.254815	36.77469833	yes	INT010120	1775	1775	NA	0	0	0	0	0	0	4	0	1	0	0	9	4	1	1	70	0	monogastrics birds	NA	ERS3415472 (SAMEA5611283)
TMP021207	Plate 19	P160812	UZ030002	GWK076SUI3	pig	monogastric	livestock	GWK076	19/07/2016	GATWIKIRA	312	7	-1.31708	36.77864167	yes	TMP021207	1771	1771	NA	0	0	0	0	0	20	0	0	0	0	16	0	0	0	0	0	0	monogastrics birds	NA	ERS3416059 (SAMEA5611870)
PLQ000544	Plate 13	P160720	UZ022134	NGN079BOV3	bovine	ruminant	livestock	NGN079	08/08/2016	NGUNDU	270	5	-1.268731667	37.06599	yes	PLQ000544	1737	1737	NA	6	0	0	0	10	0	0	0	3	0	0	0	0	0	0	0	0	ruminants birds other	NA	ERS3415533 (SAMEA5611344)
TMP015511	Plate 08	P160553	UZ025327	VIW002SUI1	pig	monogastric	livestock	VIW002	01/09/2015	VIWANDANI	312	7	-1.309915	36.878755	yes	TMP015511	1737	1737	NA	0	3	0	0	0	15	3	0	5	0	0	0	0	0	0	0	0	ruminants monogastrics birds	NA	ERS3415672 (SAMEA5611483)
TMP016346	Plate 02	P160078	UZ025738	HAR011HUM2	human	human	human	HAR011	05/10/2015	HARAMBEE	211	3	-1.287711667	36.87792167	yes	TMP016346	1730	1730	NA	0	0	0	0	0	0	40	0	0	0	0	0	0	0	0	0	0	monogastrics birds	NA	ERS3415724 (SAMEA5611535)
TMP019859	Plate 11	P160719	UZ026003	MLK023ROD1	rodent	w_mammal	wildlife	MLK023	10/11/2015	MLANGO KUBWA	312	7	-1.264538333	36.85216167	yes	TMP019859	1730	1730	NA	0	26	2	0	4	0	0	0	0	0	0	0	0	0	0	0	0	ruminants	NA	ERS3415925 (SAMEA5611736)
ALQ023169	Plate 08	P160553	UZ027612	KAS063GAL2	chickens	poultry	livestock	KAS063	18/05/2016	KASARANI	321	5	-1.22741664	36.92116014	yes	ALQ023169	1727	1727	NA	0	0	0	5	0	0	0	0	5	0	0	0	0	0	0	0	0	ruminants birds	NA	ERS3414861 (SAMEA5610671)
INT004222	Plate 09	P160554	UZ026700	UTH028AVN10	avian	w_avian	wildlife	UTH028	30/11/2015	UTHIRU	260	6	-1.263931667	36.70259	yes	INT004222	1727	1727	NA	0	7	0	0	0	0	0	0	0	0	0	0	0	0	0	0	0	ruminants	NA	ERS3415063 (SAMEA5610873)
INT004326	Plate 05	P160465	UZ026955	DAN031HUM2	human	human	human	DAN031	11/01/2016	DANDORA 'B'	313	6	-1.241636667	36.90821167	yes	INT004326	1727	1727	NA	0	9	0	0	0	0	0	0	13	0	0	0	0	0	0	0	0	ruminants birds	NA	ERS3415078 (SAMEA5610888)
INT005496	Plate 09	P160554	UZ2004919	KHW051AVN1	avian	w_avian	wildlife	KHW051	04/04/2016	KAHAWA WEST / JUJA K	311	6	-1.180833333	36.91151833	no	INT005496	1727	1727	NA	0	0	0	0	0	0	0	0	0	0	0	0	0	0	0	0	0	none	NA	ERS3415237 (SAMEA5611047)
INT007698	Plate 13	P160720	UZ028747	KOR058CAP3	goat	ruminant	livestock	KOR058	09/05/2016	NYAYO (KOROGOCHO)	312	7	-1.25093	36.88799667	yes	INT007698	1727	1727	NA	0	0	17	0	1	0	0	0	20	0	0	3	0	0	0	0	0	ruminants birds	NA	ERS3415384 (SAMEA5611195)
TMP017100	Plate 11	P160719	UZ025507	HAR012AVN9	avian	w_avian	wildlife	HAR012	07/10/2015	HARAMBEE	211	3	-1.282213333	36.88126167	no	TMP017100	1727	1727	NA	0	0	0	0	0	0	0	0	0	0	0	0	0	0	0	0	0	none	NA	ERS3415786 (SAMEA5611597)
TMP021609	Plate 19	P160812	UZ028208	KHW050ANA3	geese	poultry	livestock	KHW050	06/04/2016	KAHAWA WEST / JUJA K	311	6	-1.179393235	36.90742073	yes	TMP021609	1727	1727	NA	0	0	4	11	0	0	0	0	20	0	0	0	14	4	5	0	0	ruminants birds	NA	ERS3416087 (SAMEA5611898)
TWAG1814	Plate 17	P160773	UZ030661	BOM092HUM1	human	human	human	BOM092	14/09/2016	BOMAS	211	3	-1.323251667	36.77964333	yes	TWAG1814	1727	1727	NA	0	0	13	0	0	0	0	0	10	0	0	0	0	0	0	0	0	ruminants birds	NA	ERS3416274 (SAMEA5612086)
TWAG1873	Plate 17	P160773	UZ030853	BOM092CAP2	goat	ruminant	livestock	BOM092	14/09/2016	BOMAS	211	3	-1.323251667	36.77964333	yes	TWAG1873	1727	1727	NA	0	0	13	0	0	0	0	0	10	0	0	0	0	0	0	0	0	ruminants birds	NA	ERS3416284 (SAMEA5612096)
ALQ020065	Plate 03	P160305	UZ026480	UTH028BOV1	bovine	ruminant	livestock	UTH028	30/11/2015	UTHIRU	260	6	-1.263931667	36.70259	yes	ALQ020065	1726	1726	NA	0	7	0	0	0	0	0	0	0	0	0	0	0	0	0	0	0	ruminants	NA	ERS3414814 (SAMEA5610624)
TMP015190	Plate 21	P170066	UZ025287	VIWxxxROD3	rodent	w_mammal	wildlife	VIWxxx	NA	NA	NA	NA	NA	NA	NA	TMP015190	1724	1724	NA	NA	NA	NA	NA	NA	NA	NA	NA	NA	NA	NA	NA	NA	NA	NA	NA	NA	NA	NA	ERS3415655 (SAMEA5611466)
TMP018103	Plate 04	P160305	UZ2004595	KYL026AV_POP3	av_pop	w_avian	wildlife	KYL026	24/11/2015	KAYOLE	313	6	-1.276371667	36.920625	yes	TMP018103	1722	1722	NA	0	0	0	0	0	14	0	0	40	0	0	0	0	0	0	0	0	monogastrics birds	NA	ERS3415788 (SAMEA5611599)
TMP019809	Plate 02	P160078	UZ2004559	MLK024AVN5	avian	w_avian	wildlife	MLK024	11/11/2015	MLANGO KUBWA	312	7	-1.26418	36.85309167	yes	TMP019809	1720	1720	NA	0	0	0	0	0	0	0	0	8	0	0	7	0	0	0	0	0	birds	NA	ERS3415917 (SAMEA5611728)
INT010060	Plate 16	P160810	UZ030677	SPV100COL3	pigeons	poultry	livestock	SPV100	05/10/2016	SPRING VALLEY	110	2	-1.254815	36.77469833	yes	INT010060	1717	1717	NA	0	0	0	0	0	0	4	0	1	0	0	9	4	1	1	70	0	monogastrics birds	NA	ERS3415462 (SAMEA5611273)
PLQ000550	Plate 14	P160720	UZ022129	NGN079GAL1	chickens	poultry	livestock	NGN079	08/08/2016	NGUNDU	270	5	-1.268731667	37.06599	yes	PLQ000550	1717	1717	NA	6	0	0	0	10	0	0	0	3	0	0	0	0	0	0	0	0	ruminants birds other	NA	ERS3415534 (SAMEA5611345)
TMP020442	Plate 08	P160553	UZ029534	MIH067BOV3	bovine	ruminant	livestock	MIH067	07/06/2016	MIHANGO	270	5	-1.273335	36.944275	yes	TMP020442	1716	1716	NA	0	3	0	0	0	0	0	0	30	0	0	0	0	11	0	0	0	ruminants birds	NA	ERS3415965 (SAMEA5611776)
INT007096	Plate 06	P160465	UZ028364	LUM054GAL1	chickens	poultry	livestock	LUM054	13/04/2016	LUMUMBA (JERICHO)	220	6	-1.293103333	36.871635	yes	INT007096	1706	1706	NA	0	0	44	0	0	0	0	0	5	0	0	12	0	0	0	0	0	ruminants birds	NA	ERS3415325 (SAMEA5611135)
TMP016488	Plate 02	P160078	UZ025617	KAN007HUM1	human	human	human	KAN007	21/09/2015	KAREN	110	1	-1.360794419	36.71998186	yes	TMP016488	1706	1706	NA	0	6	0	0	0	0	0	0	0	0	0	0	2	0	0	0	0	ruminants birds other	NA	ERS3415742 (SAMEA5611553)
ALQ019512	Plate 02	P160078	UZ026518	MLK024GAL3	chickens	poultry	livestock	MLK024	11/11/2015	MLANGO KUBWA	312	7	-1.26418	36.85309167	yes	ALQ019512	1688	1688	NA	0	0	0	0	0	0	0	0	8	0	0	7	0	0	0	0	0	birds	NA	ERS3414744 (SAMEA5610554)
TMP018314	Plate 07	P160553	UZ026779	KYL026GAL5	chickens	poultry	livestock	KYL026	24/11/2015	KAYOLE	313	6	-1.276371667	36.920625	yes	TMP018314	1684	1684	NA	0	0	0	0	0	14	0	0	40	0	0	0	0	0	0	0	0	monogastrics birds	NA	ERS3415794 (SAMEA5611605)
TMP019076	Plate 01	P160078	UZ026092	MAK017LAG3	rabbit	monogastric	livestock	MAK017	27/10/2015	MAKONGENI	230	6	-1.298248333	36.84727333	yes	TMP019076	1665	1665	NA	0	0	0	0	0	0	5	1	30	0	0	0	0	0	0	0	0	monogastrics birds	NA	ERS3415829 (SAMEA5611640)
TMP021091	Plate 19	P160812	UZ027378	GTN073BAT1	bat	w_bat	wildlife	GTN073	12/07/2016	GATINA	260	6	-1.27637736	36.75747462	yes	TMP021091	1665	1665	NA	0	4	0	0	0	0	0	0	6	0	0	0	0	0	0	0	0	ruminants birds	NA	ERS3416043 (SAMEA5611854)
ALQ034843	Plate 15	P160810	UZ030474	EMB087GAL5	chickens	poultry	livestock	EMB087	24/08/2016	EMBAKASI	211	4	-1.310101667	36.89491333	yes	ALQ034843	1638	1638	NA	0	0	0	0	0	0	6	0	20	0	0	0	0	0	0	0	0	monogastrics birds	NA	ERS3414966 (SAMEA5610776)
ALQ034865	Plate 11	P160719	UZ030468	EMB087GAL3	chickens	poultry	livestock	EMB087	24/08/2016	EMBAKASI	211	4	-1.310101667	36.89491333	yes	ALQ034865	1638	1638	NA	0	0	0	0	0	0	6	0	20	0	0	0	0	0	0	0	0	monogastrics birds	NA	ERS3414969 (SAMEA5610779)
INT004178	Plate 11	P160719	UZ026206	DAN031AVN11	avian	w_avian	wildlife	DAN031	11/01/2016	DANDORA 'B'	313	6	-1.241636667	36.90821167	yes	INT004178	1638	1638	NA	0	9	0	0	0	0	0	0	13	0	0	0	0	0	0	0	0	ruminants birds	NA	ERS3415057 (SAMEA5610867)
INT007380	Plate 09	P160554	UZ028610	MWK056ANA1	ducks	poultry	livestock	MWK056	03/05/2016	MWIKI	313	6	-1.231583333	36.93017333	yes	INT007380	1638	1638	NA	0	0	4	0	0	10	0	0	0	0	0	7	0	0	0	0	0	ruminants monogastrics birds	NA	ERS3415338 (SAMEA5611148)
INT010039	Plate 17	P160773	UZ035300	SPV100AVN8	avian	w_avian	wildlife	SPV100	05/10/2016	SPRING VALLEY	110	2	-1.254815	36.77469833	yes	INT010039	1638	1638	NA	0	0	0	0	0	0	4	0	1	0	0	9	4	1	1	70	0	monogastrics birds	NA	ERS3415458 (SAMEA5611269)
PLQ000455	Plate 14	P160720	UZ030025	GWK078HUM1	human	human	human	GWK078	25/07/2016	GATWIKIRA	312	7	-1.314113333	36.78104167	yes	PLQ000455	1638	1638	NA	0	0	0	0	0	0	0	0	16	0	0	0	0	0	0	0	0	birds	NA	ERS3415519 (SAMEA5611330)
ALQ020131	Plate 04	P160305	UZ026852	UTH030HUM4	human	human	human	UTH030	01/12/2015	UTHIRU	260	6	-1.26573424	36.70066436	no	ALQ020131	1629	1629	NA	0	0	0	0	0	0	0	0	0	0	0	0	0	0	0	0	0	none	NA	ERS3414824 (SAMEA5610634)
INT005184	Plate 05	P160465	UZ027713	EAS044CAP3	goat	ruminant	livestock	EAS044	15/03/2016	EASTLEIGH NORTH	330	5	-1.268461667	36.84851	yes	INT005184	1629	1629	NA	0	0	5	0	0	0	0	0	0	0	0	0	0	0	2	0	0	ruminants birds	NA	ERS3415196 (SAMEA5611006)
INT004645	Plate 09	P160554	UZ027179	KRR037HUM4	human	human	human	KRR037	09/02/2016	KARURA	120	2	-1.215838333	36.8016	yes	INT004645	1611	1611	NA	0	5	0	0	0	0	0	0	6	250	0	0	0	0	0	0	0	ruminants birds	NA	ERS3415124 (SAMEA5610934)
TMP019867	Plate 02	P160078	UZ026412	MLK023BOV4	bovine	ruminant	livestock	MLK023	10/11/2015	MLANGO KUBWA	312	7	-1.264538333	36.85216167	yes	TMP019867	1611	1611	NA	0	26	2	0	4	0	0	0	0	0	0	0	0	0	0	0	0	ruminants	NA	ERS3415927 (SAMEA5611738)
INT007782	Plate 07	P160553	UZ028641	KOR059ROD5	rodent	w_mammal	wildlife	KOR059	10/05/2016	NYAYO (KOROGOCHO)	312	7	-1.253945	36.88923667	yes	INT007782	1485	1485	NA	0	0	0	0	0	10	0	0	0	0	0	0	0	0	0	0	0	monogastrics	NA	ERS3415395 (SAMEA5611206)
TWAG1995	Plate 18	P160773	UZ022222	MGM094HUM4	human	human	human	MGM094	19/09/2016	MUGUMOINI	212	4	-1.326458333	36.78585167	yes	TWAG1995	1463	1463	NA	0	0	0	0	0	0	0	0	3	0	0	0	0	0	0	0	0	birds	NA	ERS3416304 (SAMEA5612116)
ALQ019690	Plate 03	P160305	UZ2004568	KYL025AVN4	avian	w_avian	wildlife	KYL025	16/11/2015	KAYOLE	313	6	-1.265657435	36.91767563	yes	ALQ019690	1444	1444	NA	0	1	14	0	0	0	0	0	0	0	0	2	0	0	0	0	0	ruminants birds	NA	ERS3414765 (SAMEA5610575)
TMP016121	Plate 01	P160078	UZ025524	VIW002BAT1	bat	w_bat	wildlife	VIW002	01/09/2015	VIWANDANI	312	7	-1.309915	36.878755	yes	TMP016121	1444	1444	NA	0	3	0	0	0	15	3	0	5	0	0	0	0	0	0	0	0	ruminants monogastrics birds	NA	ERS3415698 (SAMEA5611509)
INT004978	Plate 16	P160810	UZ027228	KIL041HUM2	human	human	human	KIL041	08/03/2016	KILIMANI	110	2	-1.291786185	36.78376162	yes	INT004978	1434	1434	NA	0	0	0	3	3	0	33	0	167	0	0	6	3	4	6	0	0	ruminants monogastrics birds	NA	ERS3415168 (SAMEA5610978)
ALQ029008	Plate 15	P160810	UZ028776	MWK057SUI7	pig	monogastric	livestock	MWK057	05/05/2016	MWIKI	313	6	-1.229788913	36.92984478	yes	ALQ029008	1431	1431	NA	0	0	4	0	0	11	0	0	4	0	0	16	0	0	0	0	0	ruminants monogastrics birds	NA	ERS3414918 (SAMEA5610728)
INT007992	Plate 08	P160553	UZ028583	KAS061HUM2	human	human	human	KAS061	16/05/2016	KASARANI	321	5	-1.223748333	36.92381333	yes	INT007992	1421	1421	NA	0	0	3	0	0	10	0	0	9	0	0	0	0	0	0	0	0	ruminants monogastrics birds	NA	ERS3415424 (SAMEA5611235)
INT005810	Plate 06	P160465	UZ028199	KHW050ANA1	geese	poultry	livestock	KHW050	06/04/2016	KAHAWA WEST / JUJA K	311	6	-1.179393235	36.90742073	yes	INT005810	1408	1408	NA	0	0	4	11	0	0	0	0	20	0	0	0	14	4	5	0	0	ruminants birds	NA	ERS3415279 (SAMEA5611089)
INT005165	Plate 05	P160465	UZ027708	EAS044HUM1	human	human	human	EAS044	15/03/2016	EASTLEIGH NORTH	330	5	-1.268461667	36.84851	yes	INT005165	1312	1312	NA	0	0	5	0	0	0	0	0	0	0	0	0	0	0	2	0	0	ruminants birds	NA	ERS3415193 (SAMEA5611003)
TMP016651	Plate 18	P160773	UZ025279	VIWxxxROD2	rodent	w_mammal	wildlife	VIWxxx	NA	NA	NA	NA	NA	NA	NA	TMP016651	1308	1308	NA	NA	NA	NA	NA	NA	NA	NA	NA	NA	NA	NA	NA	NA	NA	NA	NA	NA	NA	NA	ERS3415755 (SAMEA5611566)
TMP016805	Plate 13	P160720	UZ025516	HAR010AVN5	avian	w_avian	wildlife	HAR010	06/10/2015	HARAMBEE	211	3	-1.293191667	36.88320833	yes	TMP016805	1308	1308	NA	0	0	0	0	0	0	0	0	5	0	0	0	0	0	0	0	0	birds	NA	ERS3415762 (SAMEA5611573)
TWAG00317	Plate 09	P160554	UZ029613	MIH068GAL1	chickens	poultry	livestock	MIH068	08/06/2016	MIHANGO	270	5	-1.267946667	36.94829	yes	TWAG00317	1308	1308	NA	0	0	0	0	0	0	6	0	7	0	0	0	0	0	0	0	0	monogastrics birds	NA	ERS3416243 (SAMEA5612055)
ALQ034667	Plate 17	P160773	UZ035102	EMB085AVN7	avian	w_avian	wildlife	EMB085	22/08/2016	EMBAKASI	211	4	-1.311076667	36.89346167	yes	ALQ034667	1304	1304	NA	0	0	0	0	0	0	0	0	300	0	0	0	0	0	0	26	0	birds	NA	ERS3414949 (SAMEA5610759)
INT004574	Plate 05	P160465	UZ027127	UMJ036LAG3	rabbit	monogastric	livestock	UMJ036	27/01/2016	UMOJA	212	4	-1.278311667	36.88803	yes	INT004574	1304	1304	NA	0	0	5	0	0	0	28	0	24	0	0	0	0	0	3	0	0	ruminants monogastrics birds	NA	ERS3415116 (SAMEA5610926)
INT007840	Plate 08	P160553	UZ028690	KOR060AVN1	avian	w_avian	wildlife	KOR060	11/05/2016	NYAYO (KOROGOCHO)	312	7	-1.251918333	36.89265167	no	INT007840	1304	1304	NA	0	0	0	0	0	0	0	0	0	0	0	0	0	0	0	0	0	none	NA	ERS3415403 (SAMEA5611214)
PLQ000693	Plate 17	P160773	UZ035071	NGN080ROD1	rodent	w_mammal	wildlife	NGN080	09/08/2016	NGUNDU	270	5	-1.27306	37.05743667	yes	PLQ000693	1304	1304	NA	0	0	4	0	3	0	0	0	115	0	0	4	0	0	0	0	0	ruminants birds	NA	ERS3415557 (SAMEA5611368)
TMP014972	Plate 10	P160554	UZ025242	VIW002LAG2	rabbit	monogastric	livestock	VIW002	01/09/2015	VIWANDANI	312	7	-1.309915	36.878755	yes	TMP014972	1304	1304	NA	0	3	0	0	0	15	3	0	5	0	0	0	0	0	0	0	0	ruminants monogastrics birds	NA	ERS3415638 (SAMEA5611449)
TMP020020	Plate 01	P160078	UZ026014	MAK016HUM1	human	human	human	MAK016	26/10/2015	MAKONGENI	230	6	-1.29896	36.84870833	yes	TMP020020	1304	1304	NA	0	0	0	0	0	0	0	0	11	0	0	0	0	0	0	0	0	birds	NA	ERS3415946 (SAMEA5611757)
TMP024230	Plate 18	P160773	UZ030965	LOR098CAP1	goat	ruminant	livestock	LOR098	28/09/2016	LORESHO	120	1	-1.24741938	36.7508106	yes	TMP024230	1304	1304	NA	0	0	3	0	1	0	0	0	21	14	0	2	0	0	0	0	0	ruminants birds	NA	ERS3416207 (SAMEA5612019)
TWAG00324	Plate 16	P160810	UZ029616	MIH068LAG1	rabbit	monogastric	livestock	MIH068	08/06/2016	MIHANGO	270	5	-1.267946667	36.94829	yes	TWAG00324	1304	1304	NA	0	0	0	0	0	0	6	0	7	0	0	0	0	0	0	0	0	monogastrics birds	NA	ERS3416244 (SAMEA5612056)
TWAG00337	Plate 09	P160554	UZ029612	MIH068LAG2	rabbit	monogastric	livestock	MIH068	08/06/2016	MIHANGO	270	5	-1.267946667	36.94829	yes	TWAG00337	1304	1304	NA	0	0	0	0	0	0	6	0	7	0	0	0	0	0	0	0	0	monogastrics birds	NA	ERS3416246 (SAMEA5612058)
TWAG00343	Plate 10	P160554	UZ029609	MIH068LAG4	rabbit	monogastric	livestock	MIH068	08/06/2016	MIHANGO	270	5	-1.267946667	36.94829	yes	TWAG00343	1304	1304	NA	0	0	0	0	0	0	6	0	7	0	0	0	0	0	0	0	0	monogastrics birds	NA	ERS3416247 (SAMEA5612059)
TWAG1901	Plate 18	P160773	UZ030379	BOM091ROD3	rodent	w_mammal	wildlife	BOM091	13/09/2016	BOMAS	211	3	-1.320306667	36.78094667	yes	TWAG1901	1304	1304	NA	0	0	0	0	0	0	2	0	15	0	0	0	2	3	2	0	3	monogastrics birds	NA	ERS3416289 (SAMEA5612101)
TWAG1681	Plate 18	P160773	UZ035198	KTS088ROD2	rodent	w_mammal	wildlife	KTS088	05/09/2016	KITISURU	110	1	-1.232017083	36.75897979	yes	TWAG1681	1303	1303	NA	0	4	0	0	0	0	0	0	7	5	0	6	7	0	0	0	0	ruminants birds	NA	ERS3416253 (SAMEA5612065)
ALQ017358	Plate 07	P160553	UZ025774	HAR011LAG3	rabbit	monogastric	livestock	HAR011	05/10/2015	HARAMBEE	211	3	-1.287711667	36.87792167	yes	ALQ017358	1302	1302	NA	0	0	0	0	0	0	40	0	0	0	0	0	0	0	0	0	0	monogastrics birds	NA	ERS3414689 (SAMEA5610499)
INT003119	Plate 16	P160810	UZ026900	KRR037GAL7	chickens	poultry	livestock	KRR037	09/02/2016	KARURA	120	2	-1.215838333	36.8016	yes	INT003119	1302	1302	NA	0	5	0	0	0	0	0	0	6	250	0	0	0	0	0	0	0	ruminants birds	NA	ERS3415010 (SAMEA5610820)
INT003176	Plate 10	P160554	UZ026902	KRR037GAL6	chickens	poultry	livestock	KRR037	09/02/2016	KARURA	120	2	-1.215838333	36.8016	yes	INT003176	1302	1302	NA	0	5	0	0	0	0	0	0	6	250	0	0	0	0	0	0	0	ruminants birds	NA	ERS3415014 (SAMEA5610824)
TMP018094	Plate 19	P160812	UZ026600	KYL026SUI1	pig	monogastric	livestock	KYL026	24/11/2015	KAYOLE	313	6	-1.276371667	36.920625	yes	TMP018094	1302	1302	NA	0	0	0	0	0	14	0	0	40	0	0	0	0	0	0	0	0	monogastrics birds	NA	ERS3415787 (SAMEA5611598)
TMP018430	Plate 08	P160553	UZ026594	KYL026SUI9	pig	monogastric	livestock	KYL026	24/11/2015	KAYOLE	313	6	-1.276371667	36.920625	yes	TMP018430	1302	1302	NA	0	0	0	0	0	14	0	0	40	0	0	0	0	0	0	0	0	monogastrics birds	NA	ERS3415802 (SAMEA5611613)
TMP018438	Plate 03	P160305	UZ026597	KYL026SUI6	pig	monogastric	livestock	KYL026	24/11/2015	KAYOLE	313	6	-1.276371667	36.920625	yes	TMP018438	1302	1302	NA	0	0	0	0	0	14	0	0	40	0	0	0	0	0	0	0	0	monogastrics birds	NA	ERS3415803 (SAMEA5611614)
ALQ018998	Plate 10	P160554	UZ025940	MAK016ROD1	rodent	w_mammal	wildlife	MAK016	26/10/2015	MAKONGENI	230	6	-1.29896	36.84870833	yes	ALQ018998	1298	1298	NA	0	0	0	0	0	0	0	0	11	0	0	0	0	0	0	0	0	birds	NA	ERS3414721 (SAMEA5610531)
ALQ019539	Plate 04	P160305	UZ2004585	MLK023AVN4	avian	w_avian	wildlife	MLK023	10/11/2015	MLANGO KUBWA	312	7	-1.264538333	36.85216167	yes	ALQ019539	1298	1298	NA	0	26	2	0	4	0	0	0	0	0	0	0	0	0	0	0	0	ruminants	NA	ERS3414747 (SAMEA5610557)
INT003897	Plate 21	P170066	UZ026311	DAN033ROD2	rodent	w_mammal	wildlife	DAN033	13/01/2016	DANDORA 'B'	313	6	-1.241171667	36.910715	no	INT003897	1298	1298	NA	0	0	0	0	0	0	0	0	0	0	0	0	0	0	0	0	0	none	NA	ERS3415047 (SAMEA5610857)
TMP021107	Plate 21	P170066	UZ035004	GTN075ROD2	rodent	w_mammal	wildlife	GTN075	13/07/2016	GATINA	260	6	-1.275552495	36.75860432	no	TMP021107	1298	1298	NA	0	0	0	0	0	0	0	0	0	0	0	0	0	0	0	0	0	none	NA	ERS3416046 (SAMEA5611857)
TMP021153	Plate 22	P170066	UZ027332	GTN075ROD1	rodent	w_mammal	wildlife	GTN075	13/07/2016	GATINA	260	6	-1.275552495	36.75860432	no	TMP021153	1298	1298	NA	0	0	0	0	0	0	0	0	0	0	0	0	0	0	0	0	0	none	NA	ERS3416052 (SAMEA5611863)
TMP018756	Plate 03	P160305	UZ026398	MLK023OVN2	sheep	ruminant	livestock	MLK023	10/11/2015	MLANGO KUBWA	312	7	-1.264538333	36.85216167	yes	TMP018756	1294	1294	NA	0	26	2	0	4	0	0	0	0	0	0	0	0	0	0	0	0	ruminants	NA	ERS3415815 (SAMEA5611626)
ALQ023151	Plate 07	P160553	UZ028575	KAS063HUM1	human	human	human	KAS063	18/05/2016	KASARANI	321	5	-1.22741664	36.92116014	yes	ALQ023151	1288	1288	NA	0	0	0	5	0	0	0	0	5	0	0	0	0	0	0	0	0	ruminants birds	NA	ERS3414858 (SAMEA5610668)
ALQ020035	Plate 04	P160305	UZ026826	UTH028HUM6	human	human	human	UTH028	30/11/2015	UTHIRU	260	6	-1.263931667	36.70259	yes	ALQ020035	1286	1286	NA	0	7	0	0	0	0	0	0	0	0	0	0	0	0	0	0	0	ruminants	NA	ERS3414811 (SAMEA5610621)
PLQ000600	Plate 13	P160720	UZ022196	NGN079BOV1	bovine	ruminant	livestock	NGN079	08/08/2016	NGUNDU	270	5	-1.268731667	37.06599	yes	PLQ000600	1248	1248	NA	6	0	0	0	10	0	0	0	3	0	0	0	0	0	0	0	0	ruminants birds other	NA	ERS3415542 (SAMEA5611353)
INT005176	Plate 05	P160465	UZ027726	EAS044MEL1	turkeys	poultry	livestock	EAS044	15/03/2016	EASTLEIGH NORTH	330	5	-1.268461667	36.84851	yes	INT005176	1237	1237	NA	0	0	5	0	0	0	0	0	0	0	0	0	0	0	2	0	0	ruminants birds	NA	ERS3415195 (SAMEA5611005)
INT007648	Plate 07	P160553	UZ028857	KOR058HUM3	human	human	human	KOR058	09/05/2016	NYAYO (KOROGOCHO)	312	7	-1.25093	36.88799667	yes	INT007648	1237	1237	NA	0	0	17	0	1	0	0	0	20	0	0	3	0	0	0	0	0	ruminants birds	NA	ERS3415376 (SAMEA5611187)
ALQ020159	Plate 04	P160305	UZ026688	UTH030AVN1	avian	w_avian	wildlife	UTH030	01/12/2015	UTHIRU	260	6	-1.26573424	36.70066436	no	ALQ020159	1204	1204	NA	0	0	0	0	0	0	0	0	0	0	0	0	0	0	0	0	0	none	NA	ERS3414828 (SAMEA5610638)
INT003535	Plate 12	P160719	UZ027072	UMJ035GAL6	chickens	poultry	livestock	UMJ035	26/01/2016	UMOJA	212	4	-1.282928333	36.88523333	yes	INT003535	1201	1201	NA	0	0	0	0	0	0	0	0	15	0	0	0	0	0	0	0	0	birds	NA	ERS3415031 (SAMEA5610841)
ALQ017241	Plate 09	P160554	UZ025706	HAR011GAL8	chickens	poultry	livestock	HAR011	05/10/2015	HARAMBEE	211	3	-1.287711667	36.87792167	yes	ALQ017241	1196	1196	NA	0	0	0	0	0	0	40	0	0	0	0	0	0	0	0	0	0	monogastrics birds	NA	ERS3414677 (SAMEA5610487)
ALQ017368	Plate 10	P160554	UZ025717	HAR011GAL6	chickens	poultry	livestock	HAR011	05/10/2015	HARAMBEE	211	3	-1.287711667	36.87792167	yes	ALQ017368	1196	1196	NA	0	0	0	0	0	0	40	0	0	0	0	0	0	0	0	0	0	monogastrics birds	NA	ERS3414690 (SAMEA5610500)
TMP016254	Plate 01	P160078	UZ025710	HAR011GAL3	chickens	poultry	livestock	HAR011	05/10/2015	HARAMBEE	211	3	-1.287711667	36.87792167	yes	TMP016254	1196	1196	NA	0	0	0	0	0	0	40	0	0	0	0	0	0	0	0	0	0	monogastrics birds	NA	ERS3415714 (SAMEA5611525)
TMP016275	Plate 02	P160078	UZ025714	HAR011GAL2	chickens	poultry	livestock	HAR011	05/10/2015	HARAMBEE	211	3	-1.287711667	36.87792167	yes	TMP016275	1196	1196	NA	0	0	0	0	0	0	40	0	0	0	0	0	0	0	0	0	0	monogastrics birds	NA	ERS3415717 (SAMEA5611528)
TMP020928	Plate 14	P160720	UZ022065	GTN073AVN6	avian	w_avian	wildlife	GTN073	12/07/2016	GATINA	260	6	-1.27637736	36.75747462	yes	TMP020928	1196	1196	NA	0	4	0	0	0	0	0	0	6	0	0	0	0	0	0	0	0	ruminants birds	NA	ERS3416017 (SAMEA5611828)
TMP023975	Plate 18	P160773	UZ035265	LOR097AVN3	avian	w_avian	wildlife	LOR097	27/09/2016	LORESHO	110	1	-1.247168333	36.764595	yes	TMP023975	1196	1196	NA	0	0	0	0	0	0	0	0	13	0	0	0	0	16	0	0	0	birds	NA	ERS3416169 (SAMEA5611981)
TMP015778	Plate 01	P160078	UZ025079	VIW001HUM3	human	human	human	VIW001	31/08/2015	VIWANDANI	312	7	-1.313058333	36.85866167	yes	TMP015778	1178	1178	NA	0	0	0	4	0	0	0	0	200	0	0	0	0	5	0	0	0	ruminants birds	NA	ERS3415678 (SAMEA5611489)
INT004860	Plate 05	P160465	UZ2004697	KRR038ROD4	rodent	w_mammal	wildlife	KRR038	15/02/2016	KARURA	120	2	-1.216581667	36.79006167	no	INT004860	1170	1170	NA	0	0	0	0	0	0	0	0	0	0	0	0	0	0	0	0	0	none	NA	ERS3415153 (SAMEA5610963)
PLQ2474	Plate 17	P160773	UZ030224	KTS089HUM10	human	human	human	KTS089	06/09/2016	KITISURU	110	1	-1.237836407	36.75603901	yes	PLQ2474	1163	1163	NA	0	0	0	0	0	0	0	0	0	7	0	0	0	0	0	0	0	birds	NA	ERS3415628 (SAMEA5611439)
TMP015837	Plate 02	P160078	UZ025199	VIW002CAP3	goat	ruminant	livestock	VIW002	01/09/2015	VIWANDANI	312	7	-1.309915	36.878755	yes	TMP015837	1163	1163	NA	0	3	0	0	0	15	3	0	5	0	0	0	0	0	0	0	0	ruminants monogastrics birds	NA	ERS3415684 (SAMEA5611495)
ALQ034775	Plate 18	P160773	UZ035187	EMB085ROD1	rodent	w_mammal	wildlife	EMB085	22/08/2016	EMBAKASI	211	4	-1.311076667	36.89346167	yes	ALQ034775	1161	1161	NA	0	0	0	0	0	0	0	0	300	0	0	0	0	0	0	26	0	birds	NA	ERS3414959 (SAMEA5610769)
INT000551	Plate 15	P160810	UZ025654	KAN008GAL4	chickens	poultry	livestock	KAN008	22/09/2015	KAREN	110	1	-1.338961667	36.70231333	yes	INT000551	1158	1158	NA	0	0	0	0	0	0	0	0	140	0	0	0	0	0	0	0	0	birds	NA	ERS3415006 (SAMEA5610816)
TMP019540	Plate 12	P160719	UZ025959	KIG020ROD2	rodent	w_mammal	wildlife	KIG020	03/11/2015	KIRIGU	260	6	-1.29399	36.704215	yes	TMP019540	1157	1157	NA	0	3	2	0	0	0	0	0	3	0	0	0	0	0	0	0	0	ruminants birds	NA	ERS3415889 (SAMEA5611700)
INT010144	Plate 17	P160773	UZ035293	SPV100AVN4	avian	w_avian	wildlife	SPV100	05/10/2016	SPRING VALLEY	110	2	-1.254815	36.77469833	yes	INT010144	1155	1155	NA	0	0	0	0	0	0	4	0	1	0	0	9	4	1	1	70	0	monogastrics birds	NA	ERS3415476 (SAMEA5611287)
TWAG00294	Plate 09	P160554	UZ029370	MIH067ROD1	rodent	w_mammal	wildlife	MIH067	07/06/2016	MIHANGO	270	5	-1.273335	36.944275	yes	TWAG00294	1148	1148	NA	0	3	0	0	0	0	0	0	30	0	0	0	0	11	0	0	0	ruminants birds	NA	ERS3416240 (SAMEA5612052)
TMP024001	Plate 19	P160812	UZ031040	LOR097NUM8	guinea_fowl	poultry	livestock	LOR097	27/09/2016	LORESHO	110	1	-1.247168333	36.764595	yes	TMP024001	1147	1147	NA	0	0	0	0	0	0	0	0	13	0	0	0	0	16	0	0	0	birds	NA	ERS3416173 (SAMEA5611985)
INT003124	Plate 14	P160720	UZ2004794	KRR037AVN8	avian	w_avian	wildlife	KRR037	09/02/2016	KARURA	120	2	-1.215838333	36.8016	yes	INT003124	1146	1146	NA	0	5	0	0	0	0	0	0	6	250	0	0	0	0	0	0	0	ruminants birds	NA	ERS3415011 (SAMEA5610821)
TMP016883	Plate 02	P160078	UZ025598	KAN007BOV3	bovine	ruminant	livestock	KAN007	21/09/2015	KAREN	110	1	-1.360794419	36.71998186	yes	TMP016883	1146	1146	NA	0	6	0	0	0	0	0	0	0	0	0	0	2	0	0	0	0	ruminants birds other	NA	ERS3415772 (SAMEA5611583)
ALQ018624	Plate 08	P160553	UZ025831	MBO014GAL4	chickens	poultry	livestock	MBO014	12/10/2015	MBOTELA	240	5	-1.298803333	36.86333833	yes	ALQ018624	1141	1141	NA	0	0	0	0	0	0	3	3	12	0	0	8	0	3	0	0	0	monogastrics birds	NA	ERS3414701 (SAMEA5610511)
INT007567	Plate 08	P160553	UZ028730	MWK057SUI1	pig	monogastric	livestock	MWK057	05/05/2016	MWIKI	313	6	-1.229788913	36.92984478	yes	INT007567	1141	1141	NA	0	0	4	0	0	11	0	0	4	0	0	16	0	0	0	0	0	ruminants monogastrics birds	NA	ERS3415367 (SAMEA5611178)
INT010104	Plate 18	P160773	UZ030674	SPV100COL5	pigeons	poultry	livestock	SPV100	05/10/2016	SPRING VALLEY	110	2	-1.254815	36.77469833	yes	INT010104	1141	1141	NA	0	0	0	0	0	0	4	0	1	0	0	9	4	1	1	70	0	monogastrics birds	NA	ERS3415469 (SAMEA5611280)
INT005269	Plate 05	P160465	UZ027732	EAS045HUM1	human	human	human	EAS045	16/03/2016	EASTLEIGH NORTH	330	5	-1.26705	36.84652833	no	INT005269	1136	1136	NA	0	0	0	0	0	0	0	0	0	0	0	0	0	0	0	0	0	none	NA	ERS3415207 (SAMEA5611017)
PLQ000643	Plate 16	P160810	UZ030076	NGN080HUM5	human	human	human	NGN080	09/08/2016	NGUNDU	270	5	-1.27306	37.05743667	yes	PLQ000643	1136	1136	NA	0	0	4	0	3	0	0	0	115	0	0	4	0	0	0	0	0	ruminants birds	NA	ERS3415548 (SAMEA5611359)
PLQ2198	Plate 16	P160810	UZ030763	KTS088HUM4	human	human	human	KTS088	05/09/2016	KITISURU	110	1	-1.232017083	36.75897979	yes	PLQ2198	1136	1136	NA	0	4	0	0	0	0	0	0	7	5	0	6	7	0	0	0	0	ruminants birds	NA	ERS3415595 (SAMEA5611406)
PLQ2349	Plate 15	P160810	UZ030798	KTS089HUM13	human	human	human	KTS089	06/09/2016	KITISURU	110	1	-1.237836407	36.75603901	yes	PLQ2349	1136	1136	NA	0	0	0	0	0	0	0	0	0	7	0	0	0	0	0	0	0	birds	NA	ERS3415616 (SAMEA5611427)
TMP019202	Plate 03	P160305	UZ026113	MAK018HUM5	human	human	human	MAK018	27/10/2015	MAKONGENI	230	6	-1.296248	36.851973	no	TMP019202	1136	1136	NA	0	0	0	0	0	0	0	0	0	0	0	0	0	0	0	0	0	none	NA	ERS3415844 (SAMEA5611655)
TMP020698	Plate 13	P160720	UZ021925	KWG070HUM1	human	human	human	KWG070	04/07/2016	KAWANGWARE	260	6	-1.278915	36.74525167	yes	TMP020698	1136	1136	NA	0	1	22	0	25	0	0	0	0	0	0	0	0	0	0	0	0	ruminants	NA	ERS3415983 (SAMEA5611794)
TMP020860	Plate 14	P160720	UZ021933	KWG072HUM4	human	human	human	KWG072	11/07/2016	KAWANGWARE	260	6	-1.281778333	36.74369333	no	TMP020860	1136	1136	NA	0	0	0	0	0	0	0	0	0	0	0	0	0	0	0	0	0	none	NA	ERS3416007 (SAMEA5611818)
INT007154	Plate 09	P160554	UZ028392	MWK055HUM1	human	human	human	MWK055	26/04/2016	MWIKI	313	6	-1.23016808	36.93353817	no	INT007154	1125	1125	NA	0	0	0	0	0	0	0	0	0	0	0	0	0	0	0	0	0	none	NA	ERS3415332 (SAMEA5611142)
PLQ000575	Plate 19	P160812	UZ022133	NGN079BOV2	bovine	ruminant	livestock	NGN079	08/08/2016	NGUNDU	270	5	-1.268731667	37.06599	yes	PLQ000575	1125	1125	NA	6	0	0	0	10	0	0	0	3	0	0	0	0	0	0	0	0	ruminants birds other	NA	ERS3415538 (SAMEA5611349)
PLQ2302	Plate 18	P160773	UZ030398	KTS088AVN1	avian	w_avian	wildlife	KTS088	05/09/2016	KITISURU	110	1	-1.232017083	36.75897979	yes	PLQ2302	1121	1121	NA	0	4	0	0	0	0	0	0	7	5	0	6	7	0	0	0	0	ruminants birds	NA	ERS3415610 (SAMEA5611421)
TMP021722	Plate 12	P160719	UZ028185	KHW050HUM5	human	human	human	KHW050	06/04/2016	KAHAWA WEST / JUJA K	311	6	-1.179393235	36.90742073	yes	TMP021722	1114	1114	NA	0	0	4	11	0	0	0	0	20	0	0	0	14	4	5	0	0	ruminants birds	NA	ERS3416095 (SAMEA5611906)
PLQ000960	Plate 17	P160773	UZ035121	MUT083AVN10	avian	w_avian	wildlife	MUT083	16/08/2016	MUTHANGARI	110	2	-1.263035	36.79185	no	PLQ000960	1081	1081	NA	0	0	0	0	0	0	0	0	0	0	0	0	0	0	0	0	0	none	NA	ERS3415580 (SAMEA5611391)
ALQ020172	Plate 12	P160719	UZ025982	UTH029ROD1	rodent	w_mammal	wildlife	UTH029	02/12/2015	UTHIRU	260	6	-1.259986667	36.70342	yes	ALQ020172	1079	1079	NA	0	0	0	6	0	0	0	0	115	0	0	0	0	0	0	0	0	ruminants birds	NA	ERS3414830 (SAMEA5610640)
ALQ020209	Plate 03	P160305	UZ026873	UTH029CAP2	goat	ruminant	livestock	UTH029	02/12/2015	UTHIRU	260	6	-1.259986667	36.70342	yes	ALQ020209	1079	1079	NA	0	0	0	6	0	0	0	0	115	0	0	0	0	0	0	0	0	ruminants birds	NA	ERS3414836 (SAMEA5610646)
ALQ020457	Plate 03	P160305	UZ026882	UTH029CAP6	goat	ruminant	livestock	UTH029	02/12/2015	UTHIRU	260	6	-1.259986667	36.70342	yes	ALQ020457	1079	1079	NA	0	0	0	6	0	0	0	0	115	0	0	0	0	0	0	0	0	ruminants birds	NA	ERS3414849 (SAMEA5610659)
PLQ000521	Plate 13	P160720	UZ030026	NGN079HUM1	human	human	human	NGN079	08/08/2016	NGUNDU	270	5	-1.268731667	37.06599	yes	PLQ000521	1056	1056	NA	6	0	0	0	10	0	0	0	3	0	0	0	0	0	0	0	0	ruminants birds other	NA	ERS3415529 (SAMEA5611340)
TMP019461	Plate 03	P160305	UZ2004526	KIG020AVN3	avian	w_avian	wildlife	KIG020	03/11/2015	KIRIGU	260	6	-1.29399	36.704215	yes	TMP019461	1056	1056	NA	0	3	2	0	0	0	0	0	3	0	0	0	0	0	0	0	0	ruminants birds	NA	ERS3415880 (SAMEA5611691)
INT003115	Plate 15	P160810	UZ026908	KRR037GAL10	chickens	poultry	livestock	KRR037	09/02/2016	KARURA	120	2	-1.215838333	36.8016	yes	INT003115	1049	1049	NA	0	5	0	0	0	0	0	0	6	250	0	0	0	0	0	0	0	ruminants birds	NA	ERS3415008 (SAMEA5610818)
INT003143	Plate 15	P160810	UZ027216	KRR037BOV3	bovine	ruminant	livestock	KRR037	09/02/2016	KARURA	120	2	-1.215838333	36.8016	yes	INT003143	1049	1049	NA	0	5	0	0	0	0	0	0	6	250	0	0	0	0	0	0	0	ruminants birds	NA	ERS3415013 (SAMEA5610823)
TMP023905	Plate 19	P160812	UZ030933	MGM096HUM1	human	human	human	MGM096	21/09/2016	MUGUMOINI	212	4	-1.323066667	36.78586333	yes	TMP023905	1049	1049	NA	0	0	0	0	0	0	0	0	4	0	0	0	0	0	0	0	0	birds	NA	ERS3416157 (SAMEA5611969)
ALQ020147	Plate 04	P160305	UZ026848	UTH030HUM2	human	human	human	UTH030	01/12/2015	UTHIRU	260	6	-1.26573424	36.70066436	no	ALQ020147	1011	1011	NA	0	0	0	0	0	0	0	0	0	0	0	0	0	0	0	0	0	none	NA	ERS3414826 (SAMEA5610636)
TMP024293	Plate 17	P160773	UZ030609	LOR099HUM4	human	human	human	LOR099	03/10/2016	LORESHO	120	1	-1.254446667	36.74716167	no	TMP024293	1011	1011	NA	0	0	0	0	0	0	0	0	0	0	0	0	0	0	0	0	0	none	NA	ERS3416216 (SAMEA5612028)
INT004966	Plate 13	P160720	UZ2004872	KIL042AVN7	avian	w_avian	wildlife	KIL042	09/03/2016	KILIMANI	130	2	-1.297515	36.78249167	yes	INT004966	1001	1001	NA	0	0	6	0	0	0	0	0	6	0	0	0	0	0	0	0	0	ruminants birds	NA	ERS3415167 (SAMEA5610977)
ALQ023180	Plate 07	P160553	UZ027616	KAS063CAP1	goat	ruminant	livestock	KAS063	18/05/2016	KASARANI	321	5	-1.22741664	36.92116014	yes	ALQ023180	998	998	NA	0	0	0	5	0	0	0	0	5	0	0	0	0	0	0	0	0	ruminants birds	NA	ERS3414863 (SAMEA5610673)
PLQ2493	Plate 17	P160773	UZ030775	KTS089HUM2	human	human	human	KTS089	06/09/2016	KITISURU	110	1	-1.237836407	36.75603901	yes	PLQ2493	998	998	NA	0	0	0	0	0	0	0	0	0	7	0	0	0	0	0	0	0	birds	NA	ERS3415631 (SAMEA5611442)
TMP024283	Plate 17	P160773	UZ030597	LOR099HUM3	human	human	human	LOR099	03/10/2016	LORESHO	120	1	-1.254446667	36.74716167	no	TMP024283	998	998	NA	0	0	0	0	0	0	0	0	0	0	0	0	0	0	0	0	0	none	NA	ERS3416214 (SAMEA5612026)
ALQ023177	Plate 07	P160553	UZ027613	KAS063GAL1	chickens	poultry	livestock	KAS063	18/05/2016	KASARANI	321	5	-1.22741664	36.92116014	yes	ALQ023177	949	949	NA	0	0	0	5	0	0	0	0	5	0	0	0	0	0	0	0	0	ruminants birds	NA	ERS3414862 (SAMEA5610672)
ALQ023237	Plate 07	P160553	UZ028668	SPV064AVN13	avian	w_avian	wildlife	SPV064	23/05/2016	SPRING VALLEY	110	2	-1.253818333	36.790205	yes	ALQ023237	939	939	NA	0	1	0	3	5	0	6	0	4	0	0	0	3	0	1	0	0	ruminants monogastrics birds	NA	ERS3414870 (SAMEA5610680)
TMP020331	Plate 19	P160812	UZ029331	MIH068ROD1	rodent	w_mammal	wildlife	MIH068	08/06/2016	MIHANGO	270	5	-1.267946667	36.94829	yes	TMP020331	939	939	NA	0	0	0	0	0	0	6	0	7	0	0	0	0	0	0	0	0	monogastrics birds	NA	ERS3415958 (SAMEA5611769)
TMP021095	Plate 21	P170066	UZ027361	KWG072ROD1	rodent	w_mammal	wildlife	KWG072	11/07/2016	KAWANGWARE	260	6	-1.281778333	36.74369333	no	TMP021095	939	939	NA	0	0	0	0	0	0	0	0	0	0	0	0	0	0	0	0	0	none	NA	ERS3416044 (SAMEA5611855)
TMP023930	Plate 17	P160773	UZ030343	BOM091PRM2	primate	w_mammal	wildlife	BOM091	13/09/2016	BOMAS	211	3	-1.320306667	36.78094667	yes	TMP023930	939	939	NA	0	0	0	0	0	0	2	0	15	0	0	0	2	3	2	0	3	monogastrics birds	NA	ERS3416161 (SAMEA5611973)
INT004690	Plate 11	P160719	UZ027252	KRR037GAL1	chickens	poultry	livestock	KRR037	09/02/2016	KARURA	120	2	-1.215838333	36.8016	yes	INT004690	937	937	NA	0	5	0	0	0	0	0	0	6	250	0	0	0	0	0	0	0	ruminants birds	NA	ERS3415131 (SAMEA5610941)
ALQ019759	Plate 17	P160773	UZ025973	KYLxxxROD1	rodent	w_mammal	wildlife	KYLxxx	NA	NA	NA	NA	NA	NA	NA	ALQ019759	906	906	NA	NA	NA	NA	NA	NA	NA	NA	NA	NA	NA	NA	NA	NA	NA	NA	NA	NA	NA	NA	ERS3414773 (SAMEA5610583)
INT008768	Plate 19	P160812	UZ022191	KTS088BOV4	bovine	ruminant	livestock	KTS088	05/09/2016	KITISURU	110	1	-1.232017083	36.75897979	yes	INT008768	906	906	NA	0	4	0	0	0	0	0	0	7	5	0	6	7	0	0	0	0	ruminants birds	NA	ERS3415443 (SAMEA5611254)
TMP016436	Plate 02	P160078	UZ025695	KAN009HUM1	human	human	human	KAN009	22/09/2015	KAREN	110	1	-1.313598333	36.68382833	no	TMP016436	906	906	NA	0	0	0	0	0	0	0	0	0	0	0	0	0	0	0	0	0	none	NA	ERS3415737 (SAMEA5611548)
TMP019306	Plate 04	P160305	UZ026127	KIG019CAP4	goat	ruminant	livestock	KIG019	02/11/2015	KIRIGU	260	6	-1.291726667	36.70118333	yes	TMP019306	906	906	NA	0	0	16	0	0	2	0	0	5	0	0	0	0	0	0	0	0	ruminants monogastrics birds	NA	ERS3415857 (SAMEA5611668)
TMP020920	Plate 16	P160810	UZ022087	GTN073BOV3	bovine	ruminant	livestock	GTN073	12/07/2016	GATINA	260	6	-1.27637736	36.75747462	yes	TMP020920	906	906	NA	0	4	0	0	0	0	0	0	6	0	0	0	0	0	0	0	0	ruminants birds	NA	ERS3416016 (SAMEA5611827)
ALQ017316	Plate 10	P160554	UZ025772	HAR011LAG9	rabbit	monogastric	livestock	HAR011	05/10/2015	HARAMBEE	211	3	-1.287711667	36.87792167	yes	ALQ017316	847	847	NA	0	0	0	0	0	0	40	0	0	0	0	0	0	0	0	0	0	monogastrics birds	NA	ERS3414682 (SAMEA5610492)
ALQ028278	Plate 12	P160719	UZ028720	MWK057AVN14	avian	w_avian	wildlife	MWK057	05/05/2016	MWIKI	313	6	-1.229788913	36.92984478	yes	ALQ028278	847	847	NA	0	0	4	0	0	11	0	0	4	0	0	16	0	0	0	0	0	ruminants monogastrics birds	NA	ERS3414903 (SAMEA5610713)
TMP021202	Plate 21	P170066	UZ035009	GWK076AVN3	avian	w_avian	wildlife	GWK076	19/07/2016	GATWIKIRA	312	7	-1.31708	36.77864167	yes	TMP021202	847	847	NA	0	0	0	0	0	20	0	0	0	0	16	0	0	0	0	0	0	monogastrics birds	NA	ERS3416058 (SAMEA5611869)
ALQ028214	Plate 16	P160810	UZ028316	MWK057SUI8	pig	monogastric	livestock	MWK057	05/05/2016	MWIKI	313	6	-1.229788913	36.92984478	yes	ALQ028214	793	793	NA	0	0	4	0	0	11	0	0	4	0	0	16	0	0	0	0	0	ruminants monogastrics birds	NA	ERS3414901 (SAMEA5610711)
ALQ017119	Plate 04	P160305	UZ2004449	HAR012AVN5	avian	w_avian	wildlife	HAR012	07/10/2015	HARAMBEE	211	3	-1.282213333	36.88126167	no	ALQ017119	746	746	NA	0	0	0	0	0	0	0	0	0	0	0	0	0	0	0	0	0	none	NA	ERS3414669 (SAMEA5610479)
INT005608	Plate 06	P160465	UZ028139	KHW049GAL2	chickens	poultry	livestock	KHW049	05/04/2016	KAHAWA WEST / JUJA K	311	6	-1.179655	36.90618833	yes	INT005608	746	746	NA	0	5	0	0	0	0	0	0	18	0	0	0	0	0	0	0	0	ruminants birds	NA	ERS3415253 (SAMEA5611063)
PLQ000871	Plate 21	P170066	UZ022181	MUT082GAL4	chickens	poultry	livestock	MUT082	15/08/2016	MUTHANGARI	110	2	-1.2663	36.782315	yes	PLQ000871	746	746	NA	0	2	0	1	0	0	3	0	13	0	0	0	0	0	0	0	0	ruminants monogastrics birds	NA	ERS3415570 (SAMEA5611381)
PLQ000881	Plate 15	P160810	UZ022180	MUT082GAL5	chickens	poultry	livestock	MUT082	15/08/2016	MUTHANGARI	110	2	-1.2663	36.782315	yes	PLQ000881	746	746	NA	0	2	0	1	0	0	3	0	13	0	0	0	0	0	0	0	0	ruminants monogastrics birds	NA	ERS3415571 (SAMEA5611382)
PLQ2270	Plate 15	P160810	UZ030499	KTS088GAL1	chickens	poultry	livestock	KTS088	05/09/2016	KITISURU	110	1	-1.232017083	36.75897979	yes	PLQ2270	746	746	NA	0	4	0	0	0	0	0	0	7	5	0	6	7	0	0	0	0	ruminants birds	NA	ERS3415605 (SAMEA5611416)
TMP014924	Plate 10	P160554	UZ025194	VIW002GAL2	chickens	poultry	livestock	VIW002	01/09/2015	VIWANDANI	312	7	-1.309915	36.878755	yes	TMP014924	746	746	NA	0	3	0	0	0	15	3	0	5	0	0	0	0	0	0	0	0	ruminants monogastrics birds	NA	ERS3415632 (SAMEA5611443)
TMP015320	Plate 15	P160810	UZ025143	VIW001GAL8	chickens	poultry	livestock	VIW001	31/08/2015	VIWANDANI	312	7	-1.313058333	36.85866167	yes	TMP015320	746	746	NA	0	0	0	4	0	0	0	0	200	0	0	0	0	5	0	0	0	ruminants birds	NA	ERS3415665 (SAMEA5611476)
TMP016026	Plate 02	P160078	UZ025581	MSA005HUM1	human	human	human	MSA005	16/09/2015	MOWLEM = SAIKA	311	6	-1.253531667	36.92563333	no	TMP016026	746	746	NA	0	0	0	0	0	0	0	0	0	0	0	0	0	0	0	0	0	none	NA	ERS3415691 (SAMEA5611502)
TMP018826	Plate 15	P160810	UZ026511	MLK024GAL5	chickens	poultry	livestock	MLK024	11/11/2015	MLANGO KUBWA	312	7	-1.26418	36.85309167	yes	TMP018826	746	746	NA	0	0	0	0	0	0	0	0	8	0	0	7	0	0	0	0	0	birds	NA	ERS3415819 (SAMEA5611630)
TMP018895	Plate 15	P160810	UZ026514	MLK024GAL7	chickens	poultry	livestock	MLK024	11/11/2015	MLANGO KUBWA	312	7	-1.26418	36.85309167	yes	TMP018895	746	746	NA	0	0	0	0	0	0	0	0	8	0	0	7	0	0	0	0	0	birds	NA	ERS3415820 (SAMEA5611631)
TMP019332	Plate 01	P160078	UZ026188	KIG019GAL2	chickens	poultry	livestock	KIG019	02/11/2015	KIRIGU	260	6	-1.291726667	36.70118333	yes	TMP019332	746	746	NA	0	0	16	0	0	2	0	0	5	0	0	0	0	0	0	0	0	ruminants monogastrics birds	NA	ERS3415860 (SAMEA5611671)
TMP021717	Plate 15	P160810	UZ028182	KHW050HUM2	human	human	human	KHW050	06/04/2016	KAHAWA WEST / JUJA K	311	6	-1.179393235	36.90742073	yes	TMP021717	746	746	NA	0	0	4	11	0	0	0	0	20	0	0	0	14	4	5	0	0	ruminants birds	NA	ERS3416094 (SAMEA5611905)
TMP023878	Plate 17	P160773	UZ035222	MGM095ROD3	rodent	w_mammal	wildlife	MGM095	20/09/2016	MUGUMOINI	212	4	-1.32085454	36.7856738	no	TMP023878	746	746	NA	0	0	0	0	0	0	0	0	0	0	0	0	0	0	0	0	0	none	NA	ERS3416155 (SAMEA5611967)
TWAG00177	Plate 07	P160553	UZ029542	MIH067HUM2	human	human	human	MIH067	07/06/2016	MIHANGO	270	5	-1.273335	36.944275	yes	TWAG00177	746	746	NA	0	3	0	0	0	0	0	0	30	0	0	0	0	11	0	0	0	ruminants birds	NA	ERS3416226 (SAMEA5612038)
ALQ017070	Plate 03	P160305	UZ025355	KAN009AVN1	avian	w_avian	wildlife	KAN009	22/09/2015	KAREN	110	1	-1.313598333	36.68382833	no	ALQ017070	744	744	NA	0	0	0	0	0	0	0	0	0	0	0	0	0	0	0	0	0	none	NA	ERS3414665 (SAMEA5610475)
PL015271	Plate 01	P160078	UZ2004493	MBO015ROD1	rodent	w_mammal	wildlife	MBO015	13/10/2015	MBOTELA	240	5	-1.29833	36.85970667	no	PL015271	737	737	NA	0	0	0	0	0	0	0	0	0	0	0	0	0	0	0	0	0	none	NA	ERS3415510 (SAMEA5611321)
INT007864	Plate 14	P160720	UZ028885	KAS061AVN8	avian	w_avian	wildlife	KAS061	16/05/2016	KASARANI	321	5	-1.223748333	36.92381333	yes	INT007864	716	716	NA	0	0	3	0	0	10	0	0	9	0	0	0	0	0	0	0	0	ruminants monogastrics birds	NA	ERS3415407 (SAMEA5611218)
ALQ020007	Plate 11	P160719	UZ2004600	KYL026AVN11	avian	w_avian	wildlife	KYL026	24/11/2015	KAYOLE	313	6	-1.276371667	36.920625	yes	ALQ020007	710	710	NA	0	0	0	0	0	14	0	0	40	0	0	0	0	0	0	0	0	monogastrics birds	NA	ERS3414807 (SAMEA5610617)
ALQ034869	Plate 17	P160773	UZ035098	EMB085AVN3	avian	w_avian	wildlife	EMB085	22/08/2016	EMBAKASI	211	4	-1.311076667	36.89346167	yes	ALQ034869	710	710	NA	0	0	0	0	0	0	0	0	300	0	0	0	0	0	0	26	0	birds	NA	ERS3414970 (SAMEA5610780)
ALQ019985	Plate 03	P160305	UZ026831	UTH028HUM4	human	human	human	UTH028	30/11/2015	UTHIRU	260	6	-1.263931667	36.70259	yes	ALQ019985	708	708	NA	0	7	0	0	0	0	0	0	0	0	0	0	0	0	0	0	0	ruminants	NA	ERS3414804 (SAMEA5610614)
TMP023908	Plate 19	P160812	UZ030927	MGM096GAL1	chickens	poultry	livestock	MGM096	21/09/2016	MUGUMOINI	212	4	-1.323066667	36.78586333	yes	TMP023908	695	695	NA	0	0	0	0	0	0	0	0	4	0	0	0	0	0	0	0	0	birds	NA	ERS3416158 (SAMEA5611970)
ALQ032689	Plate 16	P160810	UZ030115	MUT082HUM2	human	human	human	MUT082	15/08/2016	MUTHANGARI	110	2	-1.2663	36.782315	yes	ALQ032689	694	694	NA	0	2	0	1	0	0	3	0	13	0	0	0	0	0	0	0	0	ruminants monogastrics birds	NA	ERS3414925 (SAMEA5610735)
INT005265	Plate 09	P160554	UZ2004690	EAS044AVN9	avian	w_avian	wildlife	EAS044	15/03/2016	EASTLEIGH NORTH	330	5	-1.268461667	36.84851	yes	INT005265	683	683	NA	0	0	5	0	0	0	0	0	0	0	0	0	0	0	2	0	0	ruminants birds	NA	ERS3415206 (SAMEA5611016)
TWAG1809	Plate 18	P160773	UZ030361	BOM091AVN2	avian	w_avian	wildlife	BOM091	13/09/2016	BOMAS	211	3	-1.320306667	36.78094667	yes	TWAG1809	683	683	NA	0	0	0	0	0	0	2	0	15	0	0	0	2	3	2	0	3	monogastrics birds	NA	ERS3416273 (SAMEA5612085)
ALQ023353	Plate 07	P160553	UZ026356	SPV064CNV1	carnivore	w_mammal	wildlife	SPV064	23/05/2016	SPRING VALLEY	110	2	-1.253818333	36.790205	yes	ALQ023353	681	681	NA	0	1	0	3	5	0	6	0	4	0	0	0	3	0	1	0	0	ruminants monogastrics birds	NA	ERS3414887 (SAMEA5610697)
INT004902	Plate 10	P160554	UZ2004876	KIL041AVN1	avian	w_avian	wildlife	KIL041	08/03/2016	KILIMANI	110	2	-1.291786185	36.78376162	yes	INT004902	681	681	NA	0	0	0	3	3	0	33	0	167	0	0	6	3	4	6	0	0	ruminants monogastrics birds	NA	ERS3415160 (SAMEA5610970)
PLQ2455	Plate 18	P160773	UZ030646	KTS089GAL1	chickens	poultry	livestock	KTS089	06/09/2016	KITISURU	110	1	-1.237836407	36.75603901	yes	PLQ2455	681	681	NA	0	0	0	0	0	0	0	0	0	7	0	0	0	0	0	0	0	birds	NA	ERS3415625 (SAMEA5611436)
ALQ020080	Plate 04	P160305	UZ026459	UTH028BOV4	bovine	ruminant	livestock	UTH028	30/11/2015	UTHIRU	260	6	-1.263931667	36.70259	yes	ALQ020080	679	679	NA	0	7	0	0	0	0	0	0	0	0	0	0	0	0	0	0	0	ruminants	NA	ERS3414817 (SAMEA5610627)
TWAG00249	Plate 13	P160720	UZ029339	MIH067AVN4	avian	w_avian	wildlife	MIH067	07/06/2016	MIHANGO	270	5	-1.273335	36.944275	yes	TWAG00249	679	679	NA	0	3	0	0	0	0	0	0	30	0	0	0	0	11	0	0	0	ruminants birds	NA	ERS3416236 (SAMEA5612048)
ALQ019547	Plate 12	P160719	UZ026533	MLK024HUM7	human	human	human	MLK024	11/11/2015	MLANGO KUBWA	312	7	-1.26418	36.85309167	yes	ALQ019547	678	678	NA	0	0	0	0	0	0	0	0	8	0	0	7	0	0	0	0	0	birds	NA	ERS3414749 (SAMEA5610559)
ALQ019554	Plate 04	P160305	UZ026535	MLK024HUM6	human	human	human	MLK024	11/11/2015	MLANGO KUBWA	312	7	-1.26418	36.85309167	yes	ALQ019554	678	678	NA	0	0	0	0	0	0	0	0	8	0	0	7	0	0	0	0	0	birds	NA	ERS3414750 (SAMEA5610560)
TMP018942	Plate 04	P160305	UZ026546	MLK024HUM5	human	human	human	MLK024	11/11/2015	MLANGO KUBWA	312	7	-1.26418	36.85309167	yes	TMP018942	678	678	NA	0	0	0	0	0	0	0	0	8	0	0	7	0	0	0	0	0	birds	NA	ERS3415822 (SAMEA5611633)
TMP019793	Plate 02	P160078	UZ026436	MLK023HUM7	human	human	human	MLK023	10/11/2015	MLANGO KUBWA	312	7	-1.264538333	36.85216167	yes	TMP019793	678	678	NA	0	26	2	0	4	0	0	0	0	0	0	0	0	0	0	0	0	ruminants	NA	ERS3415915 (SAMEA5611726)
INT003585	Plate 11	P160719	UZ027122	UMJ036CAP3	goat	ruminant	livestock	UMJ036	27/01/2016	UMOJA	212	4	-1.278311667	36.88803	yes	INT003585	677	677	NA	0	0	5	0	0	0	28	0	24	0	0	0	0	0	3	0	0	ruminants monogastrics birds	NA	ERS3415032 (SAMEA5610842)
PLQ000287	Plate 16	P160810	UZ022245	MUT084CAP1	goat	ruminant	livestock	MUT084	17/08/2016	MUTHANGARI	110	2	-1.265065	36.78292	yes	PLQ000287	677	677	NA	0	0	0	2	0	0	0	0	2	0	0	0	0	0	0	0	0	ruminants birds	NA	ERS3415515 (SAMEA5611326)
PLQ000925	Plate 18	P160773	UZ035141	MUT082AVN1	avian	w_avian	wildlife	MUT082	15/08/2016	MUTHANGARI	110	2	-1.2663	36.782315	yes	PLQ000925	677	677	NA	0	2	0	1	0	0	3	0	13	0	0	0	0	0	0	0	0	ruminants monogastrics birds	NA	ERS3415575 (SAMEA5611386)
INT004869	Plate 05	P160465	UZ027519	KIL041OVN3	sheep	ruminant	livestock	KIL041	08/03/2016	KILIMANI	110	2	-1.291786185	36.78376162	yes	INT004869	675	675	NA	0	0	0	3	3	0	33	0	167	0	0	6	3	4	6	0	0	ruminants monogastrics birds	NA	ERS3415155 (SAMEA5610965)
TMP020506	Plate 09	P160554	UZ029980	KWG070OVN1	sheep	ruminant	livestock	KWG070	04/07/2016	KAWANGWARE	260	6	-1.278915	36.74525167	yes	TMP020506	675	675	NA	0	1	22	0	25	0	0	0	0	0	0	0	0	0	0	0	0	ruminants	NA	ERS3415972 (SAMEA5611783)
TMP015227	Plate 21	P170066	UZ025124	VIW001CAP2	goat	ruminant	livestock	VIW001	31/08/2015	VIWANDANI	312	7	-1.313058333	36.85866167	yes	TMP015227	675*	675	NA	0	0	0	4	0	0	0	0	200	0	0	0	0	5	0	0	0	ruminants birds	NA	ERS3415658 (SAMEA5611469)
TWAG1982	Plate 17	P160773	UZ035230	MGM095ROD2	rodent	w_mammal	wildlife	MGM095	20/09/2016	MUGUMOINI	212	4	-1.32085454	36.7856738	no	TWAG1982	657	657	NA	0	0	0	0	0	0	0	0	0	0	0	0	0	0	0	0	0	none	NA	ERS3416302 (SAMEA5612114)
PLQ000690	Plate 21	P170066	UZ035070	NGN080ROD2	rodent	w_mammal	wildlife	NGN080	09/08/2016	NGUNDU	270	5	-1.27306	37.05743667	yes	PLQ000690	648	648	NA	0	0	4	0	3	0	0	0	115	0	0	4	0	0	0	0	0	ruminants birds	NA	ERS3415556 (SAMEA5611367)
TWAG1916	Plate 18	P160773	UZ030374	MGM094AVN2	avian	w_avian	wildlife	MGM094	19/09/2016	MUGUMOINI	212	4	-1.326458333	36.78585167	yes	TWAG1916	642	642	NA	0	0	0	0	0	0	0	0	3	0	0	0	0	0	0	0	0	birds	NA	ERS3416291 (SAMEA5612103)
ALQ018852	Plate 03	P160305	UZ2004470	MBO015AVN1	avian	w_avian	wildlife	MBO015	13/10/2015	MBOTELA	240	5	-1.29833	36.85970667	no	ALQ018852	641	641	NA	0	0	0	0	0	0	0	0	0	0	0	0	0	0	0	0	0	none	NA	ERS3414711 (SAMEA5610521)
ALQ019848	Plate 04	P160305	UZ026584	KYL026SUI2	pig	monogastric	livestock	KYL026	24/11/2015	KAYOLE	313	6	-1.276371667	36.920625	yes	ALQ019848	641	641	NA	0	0	0	0	0	14	0	0	40	0	0	0	0	0	0	0	0	monogastrics birds	NA	ERS3414785 (SAMEA5610595)
ALQ028350	Plate 15	P160810	UZ028830	KOR059SUI5	pig	monogastric	livestock	KOR059	10/05/2016	NYAYO (KOROGOCHO)	312	7	-1.253945	36.88923667	yes	ALQ028350	641	641	NA	0	0	0	0	0	10	0	0	0	0	0	0	0	0	0	0	0	monogastrics	NA	ERS3414906 (SAMEA5610716)
ALQ034931	Plate 18	P160773	UZ035207	KTS089ROD1	rodent	w_mammal	wildlife	KTS089	06/09/2016	KITISURU	110	1	-1.237836407	36.75603901	yes	ALQ034931	641	641	NA	0	0	0	0	0	0	0	0	0	7	0	0	0	0	0	0	0	birds	NA	ERS3414975 (SAMEA5610785)
INT005279	Plate 05	P160465	UZ2004887	STC046AVN3	avian	w_avian	wildlife	STC046	22/03/2016	SOUTH C	211	3	-1.325046667	36.81989167	yes	INT005279	641	641	NA	0	0	0	0	0	0	0	0	9	0	0	0	0	0	0	0	0	birds	NA	ERS3415209 (SAMEA5611019)
PLQ000702	Plate 21	P170066	UZ035061	NGN080AVN9	avian	w_avian	wildlife	NGN080	09/08/2016	NGUNDU	270	5	-1.27306	37.05743667	yes	PLQ000702	641	641	NA	0	0	4	0	3	0	0	0	115	0	0	4	0	0	0	0	0	ruminants birds	NA	ERS3415559 (SAMEA5611370)
TMP016156	Plate 11	P160719	UZ025337	VIW002AVN7	avian	w_avian	wildlife	VIW002	01/09/2015	VIWANDANI	312	7	-1.309915	36.878755	yes	TMP016156	641	641	NA	0	3	0	0	0	15	3	0	5	0	0	0	0	0	0	0	0	ruminants monogastrics birds	NA	ERS3415704 (SAMEA5611515)
TMP018289	Plate 09	P160554	UZ026895	UTH029GAL8	chickens	poultry	livestock	UTH029	02/12/2015	UTHIRU	260	6	-1.259986667	36.70342	yes	TMP018289	641	641	NA	0	0	0	6	0	0	0	0	115	0	0	0	0	0	0	0	0	ruminants birds	NA	ERS3415792 (SAMEA5611603)
TMP021693	Plate 09	P160554	UZ028149	KHW049BOV4	bovine	ruminant	livestock	KHW049	05/04/2016	KAHAWA WEST / JUJA K	311	6	-1.179655	36.90618833	yes	TMP021693	641	641	NA	0	5	0	0	0	0	0	0	18	0	0	0	0	0	0	0	0	ruminants birds	NA	ERS3416093 (SAMEA5611904)
TWAG1731	Plate 17	P160773	UZ030578	BOM091GAL5	chickens	poultry	livestock	BOM091	13/09/2016	BOMAS	211	3	-1.320306667	36.78094667	yes	TWAG1731	641	641	NA	0	0	0	0	0	0	2	0	15	0	0	0	2	3	2	0	3	monogastrics birds	NA	ERS3416261 (SAMEA5612073)
TMP016501	Plate 02	P160078	UZ025612	KAN007HUM3	human	human	human	KAN007	21/09/2015	KAREN	110	1	-1.360794419	36.71998186	yes	TMP016501	640	640	NA	0	6	0	0	0	0	0	0	0	0	0	0	2	0	0	0	0	ruminants birds other	NA	ERS3415744 (SAMEA5611555)
TMP020944	Plate 13	P160720	UZ022043	GTN073AVN8	avian	w_avian	wildlife	GTN073	12/07/2016	GATINA	260	6	-1.27637736	36.75747462	yes	TMP020944	636	636	NA	0	4	0	0	0	0	0	0	6	0	0	0	0	0	0	0	0	ruminants birds	NA	ERS3416020 (SAMEA5611831)
ALQ019153	Plate 10	P160554	UZ027507	KIL041ANA2	ducks	poultry	livestock	KIL041	08/03/2016	KILIMANI	110	2	-1.291786185	36.78376162	yes	ALQ019153	617	617	NA	0	0	0	3	3	0	33	0	167	0	0	6	3	4	6	0	0	ruminants monogastrics birds	NA	ERS3414729 (SAMEA5610539)
ALQ019653	Plate 03	P160305	UZ2004576	KYL025AVN2	avian	w_avian	wildlife	KYL025	16/11/2015	KAYOLE	313	6	-1.265657435	36.91767563	yes	ALQ019653	616	616	NA	0	1	14	0	0	0	0	0	0	0	0	2	0	0	0	0	0	ruminants birds	NA	ERS3414762 (SAMEA5610572)
ALQ019735	Plate 12	P160719	UZ2004565	KYL025AVN3	avian	w_avian	wildlife	KYL025	16/11/2015	KAYOLE	313	6	-1.265657435	36.91767563	yes	ALQ019735	616	616	NA	0	1	14	0	0	0	0	0	0	0	0	2	0	0	0	0	0	ruminants birds	NA	ERS3414770 (SAMEA5610580)
INT000333	Plate 21	P170066	UZ025556	MSA006GAL1	chickens	poultry	livestock	MSA006	15/09/2015	MOWLEM = SAIKA	313	6	-1.256981667	36.90746667	yes	INT000333	616	616	NA	0	0	0	0	0	0	0	0	15	0	0	0	0	0	0	0	0	birds other	NA	ERS3414992 (SAMEA5610802)
INT004268	Plate 03	P160305	UZ027007	DAN032GAL1	chickens	poultry	livestock	DAN032	12/01/2016	DANDORA 'B'	313	6	-1.24761043	36.90650254	yes	INT004268	616	616	NA	0	0	0	0	0	0	0	0	53	0	0	0	0	0	0	0	0	birds	NA	ERS3415070 (SAMEA5610880)
INT004522	Plate 06	P160465	UZ027091	UMJ035GAL3	chickens	poultry	livestock	UMJ035	26/01/2016	UMOJA	212	4	-1.282928333	36.88523333	yes	INT004522	616	616	NA	0	0	0	0	0	0	0	0	15	0	0	0	0	0	0	0	0	birds	NA	ERS3415107 (SAMEA5610917)
INT006319	Plate 11	P160719	UZ029354	MIH068AVN2	avian	w_avian	wildlife	MIH068	08/06/2016	MIHANGO	270	5	-1.267946667	36.94829	yes	INT006319	616	616	NA	0	0	0	0	0	0	6	0	7	0	0	0	0	0	0	0	0	monogastrics birds	NA	ERS3415312 (SAMEA5611122)
TMP017071	Plate 01	P160078	UZ025871	MBO014GAL2	chickens	poultry	livestock	MBO014	12/10/2015	MBOTELA	240	5	-1.298803333	36.86333833	yes	TMP017071	616	616	NA	0	0	0	0	0	0	3	3	12	0	0	8	0	3	0	0	0	monogastrics birds	NA	ERS3415785 (SAMEA5611596)
TMP020830	Plate 15	P160810	UZ029438	GTN075AVN2	avian	w_avian	wildlife	GTN075	13/07/2016	GATINA	260	6	-1.275552495	36.75860432	no	TMP020830	616	616	NA	0	0	0	0	0	0	0	0	0	0	0	0	0	0	0	0	0	none	NA	ERS3416003 (SAMEA5611814)
TMP023957	Plate 19	P160812	UZ031048	LOR097GAL1	chickens	poultry	livestock	LOR097	27/09/2016	LORESHO	110	1	-1.247168333	36.764595	yes	TMP023957	616	616	NA	0	0	0	0	0	0	0	0	13	0	0	0	0	16	0	0	0	birds	NA	ERS3416166 (SAMEA5611978)
INT005486	Plate 06	P160465	UZ028060	KHW051HUM1	human	human	human	KHW051	04/04/2016	KAHAWA WEST / JUJA K	311	6	-1.180833333	36.91151833	no	INT005486	609	609	NA	0	0	0	0	0	0	0	0	0	0	0	0	0	0	0	0	0	none	NA	ERS3415236 (SAMEA5611046)
TWAG00288	Plate 09	P160554	UZ029353	MIH068AVN3	avian	w_avian	wildlife	MIH068	08/06/2016	MIHANGO	270	5	-1.267946667	36.94829	yes	TWAG00288	607	607	NA	0	0	0	0	0	0	6	0	7	0	0	0	0	0	0	0	0	monogastrics birds	NA	ERS3416239 (SAMEA5612051)
INT004334	Plate 09	P160554	UZ2004727	DAN031AVN12	avian	w_avian	wildlife	DAN031	11/01/2016	DANDORA 'B'	313	6	-1.241636667	36.90821167	yes	INT004334	602	602	NA	0	9	0	0	0	0	0	0	13	0	0	0	0	0	0	0	0	ruminants birds	NA	ERS3415079 (SAMEA5610889)
PL015129	Plate 11	P160719	UZ025318	MBO013ROD2	rodent	w_mammal	wildlife	MBO013	13/10/2015	MBOTELA	240	5	-1.298876667	36.86243	yes	PL015129	602	602	NA	0	0	7	0	0	0	0	0	0	0	0	0	0	0	0	0	0	ruminants	NA	ERS3415498 (SAMEA5611309)
TMP019301	Plate 11	P160719	UZ025949	KIG019BAT2	bat	w_bat	wildlife	KIG019	02/11/2015	KIRIGU	260	6	-1.291726667	36.70118333	yes	TMP019301	602	602	NA	0	0	16	0	0	2	0	0	5	0	0	0	0	0	0	0	0	ruminants monogastrics birds	NA	ERS3415856 (SAMEA5611667)
TWAG00283	Plate 10	P160554	UZ029360	MIH068AVN6	avian	w_avian	wildlife	MIH068	08/06/2016	MIHANGO	270	5	-1.267946667	36.94829	yes	TWAG00283	602	602	NA	0	0	0	0	0	0	6	0	7	0	0	0	0	0	0	0	0	monogastrics birds	NA	ERS3416238 (SAMEA5612050)
TMP019601	Plate 03	P160305	UZ026209	KIG021AVN2	avian	w_avian	wildlife	KIG021	03/11/2015	KIRIGU	260	6	-1.288618333	36.69824333	no	TMP019601	589	589	NA	0	0	0	0	0	0	0	0	0	0	0	0	0	0	0	0	0	none	NA	ERS3415896 (SAMEA5611707)
TMP019613	Plate 12	P160719	UZ026297	KIG021AVN7	avian	w_avian	wildlife	KIG021	03/11/2015	KIRIGU	260	6	-1.288618333	36.69824333	no	TMP019613	589	589	NA	0	0	0	0	0	0	0	0	0	0	0	0	0	0	0	0	0	none	NA	ERS3415898 (SAMEA5611709)
TMP019709	Plate 11	P160719	UZ026290	KIG021AVN5	avian	w_avian	wildlife	KIG021	03/11/2015	KIRIGU	260	6	-1.288618333	36.69824333	no	TMP019709	589	589	NA	0	0	0	0	0	0	0	0	0	0	0	0	0	0	0	0	0	none	NA	ERS3415904 (SAMEA5611715)
TMP016452	Plate 06	P160465	UZ025451	KAN009AVN9	avian	w_avian	wildlife	KAN009	22/09/2015	KAREN	110	1	-1.313598333	36.68382833	no	TMP016452	582	582	NA	0	0	0	0	0	0	0	0	0	0	0	0	0	0	0	0	0	none	NA	ERS3415738 (SAMEA5611549)
TMP016540	Plate 09	P160554	UZ025350	VIW002AVN5	avian	w_avian	wildlife	VIW002	01/09/2015	VIWANDANI	312	7	-1.309915	36.878755	yes	TMP016540	549	549	NA	0	3	0	0	0	15	3	0	5	0	0	0	0	0	0	0	0	ruminants monogastrics birds	NA	ERS3415748 (SAMEA5611559)
INT005092	Plate 05	P160465	UZ027694	EAS043HUM1	human	human	human	EAS043	14/03/2016	EASTLEIGH NORTH	330	5	-1.266996667	36.84912833	yes	INT005092	543	543	NA	0	0	0	0	0	0	0	0	8	0	0	0	0	0	0	0	0	birds	NA	ERS3415184 (SAMEA5610994)
ALQ028098	Plate 11	P160719	UZ028359	LUM054CAP3	goat	ruminant	livestock	LUM054	13/04/2016	LUMUMBA (JERICHO)	220	6	-1.293103333	36.871635	yes	ALQ028098	542	542	NA	0	0	44	0	0	0	0	0	5	0	0	12	0	0	0	0	0	ruminants birds	NA	ERS3414894 (SAMEA5610704)
INT005215	Plate 09	P160554	UZ2004822	EAS044AVN1	avian	w_avian	wildlife	EAS044	15/03/2016	EASTLEIGH NORTH	330	5	-1.268461667	36.84851	yes	INT005215	542	542	NA	0	0	5	0	0	0	0	0	0	0	0	0	0	0	2	0	0	ruminants birds	NA	ERS3415201 (SAMEA5611011)
ALQ034702	Plate 17	P160773	UZ035105	EMB085AVN8	avian	w_avian	wildlife	EMB085	22/08/2016	EMBAKASI	211	4	-1.311076667	36.89346167	yes	ALQ034702	541	541	NA	0	0	0	0	0	0	0	0	300	0	0	0	0	0	0	26	0	birds	NA	ERS3414951 (SAMEA5610761)
INT005440	Plate 06	P160465	UZ028055	STC048HUM1	human	human	human	STC048	30/03/2016	SOUTH C	211	3	-1.324195	36.82088333	no	INT005440	541	541	NA	0	0	0	0	0	0	0	0	0	0	0	0	0	0	0	0	0	none	NA	ERS3415229 (SAMEA5611039)
PL015118	Plate 12	P160719	UZ2004459	MBO013AVN1	avian	w_avian	wildlife	MBO013	13/10/2015	MBOTELA	240	5	-1.298876667	36.86243	yes	PL015118	541	541	NA	0	0	7	0	0	0	0	0	0	0	0	0	0	0	0	0	0	ruminants	NA	ERS3415496 (SAMEA5611307)
PLQ2212	Plate 15	P160810	UZ030739	KTS088HUM6	human	human	human	KTS088	05/09/2016	KITISURU	110	1	-1.232017083	36.75897979	yes	PLQ2212	541	541	NA	0	4	0	0	0	0	0	0	7	5	0	6	7	0	0	0	0	ruminants birds	NA	ERS3415597 (SAMEA5611408)
TMP019468	Plate 11	P160719	UZ2004542	KIG020AVN11	avian	w_avian	wildlife	KIG020	03/11/2015	KIRIGU	260	6	-1.29399	36.704215	yes	TMP019468	541	541	NA	0	3	2	0	0	0	0	0	3	0	0	0	0	0	0	0	0	ruminants birds	NA	ERS3415881 (SAMEA5611692)
TMP024127	Plate 19	P160812	UZ030972	LOR098HUM2	human	human	human	LOR098	28/09/2016	LORESHO	120	1	-1.24741938	36.7508106	yes	TMP024127	541	541	NA	0	0	3	0	1	0	0	0	21	14	0	2	0	0	0	0	0	ruminants birds	NA	ERS3416192 (SAMEA5612004)
ALQ019508	Plate 11	P160719	UZ025971	MLK023ROD5	rodent	w_mammal	wildlife	MLK023	10/11/2015	MLANGO KUBWA	312	7	-1.264538333	36.85216167	yes	ALQ019508	540	540	NA	0	26	2	0	4	0	0	0	0	0	0	0	0	0	0	0	0	ruminants	NA	ERS3414743 (SAMEA5610553)
INT005201	Plate 14	P160720	UZ2004692	EAS044AVN3	avian	w_avian	wildlife	EAS044	15/03/2016	EASTLEIGH NORTH	330	5	-1.268461667	36.84851	yes	INT005201	540	540	NA	0	0	5	0	0	0	0	0	0	0	0	0	0	0	2	0	0	ruminants birds	NA	ERS3415199 (SAMEA5611009)
INT006152	Plate 17	P160773	UZ029294	SPV064LAG3	rabbit	monogastric	livestock	SPV064	23/05/2016	SPRING VALLEY	110	2	-1.253818333	36.790205	yes	INT006152	540	540	NA	0	1	0	3	5	0	6	0	4	0	0	0	3	0	1	0	0	ruminants monogastrics birds	NA	ERS3415307 (SAMEA5611117)
PL015063	Plate 15	P160810	UZ2004460	MBO013AVN2	avian	w_avian	wildlife	MBO013	13/10/2015	MBOTELA	240	5	-1.298876667	36.86243	yes	PL015063	540	540	NA	0	0	7	0	0	0	0	0	0	0	0	0	0	0	0	0	0	ruminants	NA	ERS3415487 (SAMEA5611298)
TMP020905	Plate 14	P160720	UZ022027	GTN073AVN2	avian	w_avian	wildlife	GTN073	12/07/2016	GATINA	260	6	-1.27637736	36.75747462	yes	TMP020905	540	540	NA	0	4	0	0	0	0	0	0	6	0	0	0	0	0	0	0	0	ruminants birds	NA	ERS3416013 (SAMEA5611824)
PLQ2183	Plate 18	P160773	UZ030403	KTS089BAT1	bat	w_bat	wildlife	KTS089	06/09/2016	KITISURU	110	1	-1.237836407	36.75603901	yes	PLQ2183	538	538	NA	0	0	0	0	0	0	0	0	0	7	0	0	0	0	0	0	0	birds	NA	ERS3415592 (SAMEA5611403)
PLQ2189	Plate 16	P160810	UZ030752	KTS088HUM8	human	human	human	KTS088	05/09/2016	KITISURU	110	1	-1.232017083	36.75897979	yes	PLQ2189	538	538	NA	0	4	0	0	0	0	0	0	7	5	0	6	7	0	0	0	0	ruminants birds	NA	ERS3415593 (SAMEA5611404)
PLQ2296	Plate 15	P160810	UZ030500	KTS088ANA2	geese	poultry	livestock	KTS088	05/09/2016	KITISURU	110	1	-1.232017083	36.75897979	yes	PLQ2296	538	538	NA	0	4	0	0	0	0	0	0	7	5	0	6	7	0	0	0	0	ruminants birds	NA	ERS3415609 (SAMEA5611420)
INT005840	Plate 10	P160554	UZ028202	KHW050ANA2	geese	poultry	livestock	KHW050	06/04/2016	KAHAWA WEST / JUJA K	311	6	-1.179393235	36.90742073	yes	INT005840	537	537	NA	0	0	4	11	0	0	0	0	20	0	0	0	14	4	5	0	0	ruminants birds	NA	ERS3415283 (SAMEA5611093)
INT004550	Plate 06	P160465	UZ027102	UMJ036GAL4	chickens	poultry	livestock	UMJ036	27/01/2016	UMOJA	212	4	-1.278311667	36.88803	yes	INT004550	522	522	NA	0	0	5	0	0	0	28	0	24	0	0	0	0	0	3	0	0	ruminants monogastrics birds	NA	ERS3415112 (SAMEA5610922)
TMP015804	Plate 01	P160078	UZ025151	VIW001GAL2	chickens	poultry	livestock	VIW001	31/08/2015	VIWANDANI	312	7	-1.313058333	36.85866167	yes	TMP015804	522	522	NA	0	0	0	4	0	0	0	0	200	0	0	0	0	5	0	0	0	ruminants birds	NA	ERS3415683 (SAMEA5611494)
ALQ034694	Plate 15	P160810	UZ030271	EMB085HUM8	human	human	human	EMB085	22/08/2016	EMBAKASI	211	4	-1.311076667	36.89346167	yes	ALQ034694	517	517	NA	0	0	0	0	0	0	0	0	300	0	0	0	0	0	0	26	0	birds	NA	ERS3414950 (SAMEA5610760)
PLQ2432	Plate 16	P160810	UZ030799	KTS089HUM5	human	human	human	KTS089	06/09/2016	KITISURU	110	1	-1.237836407	36.75603901	yes	PLQ2432	517	517	NA	0	0	0	0	0	0	0	0	0	7	0	0	0	0	0	0	0	birds	NA	ERS3415621 (SAMEA5611432)
TMP016015	Plate 01	P160078	UZ025121	VIW002HUM2	human	human	human	VIW002	01/09/2015	VIWANDANI	312	7	-1.309915	36.878755	yes	TMP016015	517	517	NA	0	3	0	0	0	15	3	0	5	0	0	0	0	0	0	0	0	ruminants monogastrics birds	NA	ERS3415688 (SAMEA5611499)
TMP020992	Plate 13	P160720	UZ022066	GTN073AVN12	avian	w_avian	wildlife	GTN073	12/07/2016	GATINA	260	6	-1.27637736	36.75747462	yes	TMP020992	517	517	NA	0	4	0	0	0	0	0	0	6	0	0	0	0	0	0	0	0	ruminants birds	NA	ERS3416027 (SAMEA5611838)
INT004578	Plate 05	P160465	UZ027167	UMJ036HUM3	human	human	human	UMJ036	27/01/2016	UMOJA	212	4	-1.278311667	36.88803	yes	INT004578	504	504	NA	0	0	5	0	0	0	28	0	24	0	0	0	0	0	3	0	0	ruminants monogastrics birds	NA	ERS3415117 (SAMEA5610927)
INT003392	Plate 16	P160810	UZ026348	KRR037BAT1	bat	w_bat	wildlife	KRR037	09/02/2016	KARURA	120	2	-1.215838333	36.8016	yes	INT003392	501	501	NA	0	5	0	0	0	0	0	0	6	250	0	0	0	0	0	0	0	ruminants birds	NA	ERS3415025 (SAMEA5610835)
TMP015094	Plate 13	P160720	UZ025413	MSA004GAL3	chickens	poultry	livestock	MSA004	14/09/2015	MOWLEM = SAIKA	311	6	-1.245281667	36.92033333	yes	TMP015094	501	501	NA	0	5	0	0	0	7	4	0	20	0	0	0	0	0	0	0	0	ruminants monogastrics birds other	NA	ERS3415644 (SAMEA5611455)
INT007563	Plate 08	P160553	UZ028765	MWK057CAP1	goat	ruminant	livestock	MWK057	05/05/2016	MWIKI	313	6	-1.229788913	36.92984478	yes	INT007563	480	480	NA	0	0	4	0	0	11	0	0	4	0	0	16	0	0	0	0	0	ruminants monogastrics birds	NA	ERS3415366 (SAMEA5611177)
ALQ023490	Plate 21	P170066	UZ030594	BOM093HUM1	human	human	human	BOM093	15/09/2016	BOMAS	211	3	-1.324256667	36.779295	no	ALQ023490	469	469	NA	0	0	0	0	0	0	0	0	0	0	0	0	0	0	0	0	0	none	NA	ERS3414889 (SAMEA5610699)
ALQ034601	Plate 18	P160773	UZ030263	EMB085HUM6	human	human	human	EMB085	22/08/2016	EMBAKASI	211	4	-1.311076667	36.89346167	yes	ALQ034601	454	454	NA	0	0	0	0	0	0	0	0	300	0	0	0	0	0	0	26	0	birds	NA	ERS3414940 (SAMEA5610750)
ALQ018703	Plate 01	P160078	UZ025848	MBO014ANA2	ducks	poultry	livestock	MBO014	12/10/2015	MBOTELA	240	5	-1.298803333	36.86333833	yes	ALQ018703	453	453	NA	0	0	0	0	0	0	3	3	12	0	0	8	0	3	0	0	0	monogastrics birds	NA	ERS3414706 (SAMEA5610516)
INT007598	Plate 08	P160553	UZ028766	MWK057ANA1	ducks	poultry	livestock	MWK057	05/05/2016	MWIKI	313	6	-1.229788913	36.92984478	yes	INT007598	453	453	NA	0	0	4	0	0	11	0	0	4	0	0	16	0	0	0	0	0	ruminants monogastrics birds	NA	ERS3415372 (SAMEA5611183)
ALQ019585	Plate 11	P160719	UZ026629	KYL025HUM4	human	human	human	KYL025	16/11/2015	KAYOLE	313	6	-1.265657435	36.91767563	yes	ALQ019585	452	452	NA	0	1	14	0	0	0	0	0	0	0	0	2	0	0	0	0	0	ruminants birds	NA	ERS3414752 (SAMEA5610562)
ALQ020041	Plate 03	P160305	UZ026787	KYL026HUM3	human	human	human	KYL026	24/11/2015	KAYOLE	313	6	-1.276371667	36.920625	yes	ALQ020041	452	452	NA	0	0	0	0	0	14	0	0	40	0	0	0	0	0	0	0	0	monogastrics birds	NA	ERS3414812 (SAMEA5610622)
ALQ020044	Plate 21	P170066	UZ026789	KYL026HUM1	human	human	human	KYL026	24/11/2015	KAYOLE	313	6	-1.276371667	36.920625	yes	ALQ020044	452	452	NA	0	0	0	0	0	14	0	0	40	0	0	0	0	0	0	0	0	monogastrics birds	NA	ERS3414813 (SAMEA5610623)
TMP020818	Plate 13	P160720	UZ021947	KWG072HUM3	human	human	human	KWG072	11/07/2016	KAWANGWARE	260	6	-1.281778333	36.74369333	no	TMP020818	450	450	NA	0	0	0	0	0	0	0	0	0	0	0	0	0	0	0	0	0	none	NA	ERS3416001 (SAMEA5611812)
ALQ018751	Plate 08	P160553	UZ025895	MBO013CAP3	goat	ruminant	livestock	MBO013	13/10/2015	MBOTELA	240	5	-1.298876667	36.86243	yes	ALQ018751	448	448	NA	0	0	7	0	0	0	0	0	0	0	0	0	0	0	0	0	0	ruminants	NA	ERS3414708 (SAMEA5610518)
INT004377	Plate 10	P160554	UZ2004752	DANDUMPAV_POP4	av_pop	w_avian	wildlife	DANDUMP	NA	NA	NA	NA	NA	NA	NA	INT004377	448	448	NA	NA	NA	NA	NA	NA	NA	NA	NA	NA	NA	NA	NA	NA	NA	NA	NA	NA	NA	NA	ERS3415085 (SAMEA5610895)
PL015249	Plate 01	P160078	UZ2004467	MBO015AVN3	avian	w_avian	wildlife	MBO015	13/10/2015	MBOTELA	240	5	-1.29833	36.85970667	no	PL015249	448	448	NA	0	0	0	0	0	0	0	0	0	0	0	0	0	0	0	0	0	none	NA	ERS3415507 (SAMEA5611318)
TWAG1803	Plate 18	P160773	UZ030366	BOM091AVN3	avian	w_avian	wildlife	BOM091	13/09/2016	BOMAS	211	3	-1.320306667	36.78094667	yes	TWAG1803	448	448	NA	0	0	0	0	0	0	2	0	15	0	0	0	2	3	2	0	3	monogastrics birds	NA	ERS3416272 (SAMEA5612084)
TWAG1884	Plate 17	P160773	UZ030860	BOM092CAP3	goat	ruminant	livestock	BOM092	14/09/2016	BOMAS	211	3	-1.323251667	36.77964333	yes	TWAG1884	447	447	NA	0	0	13	0	0	0	0	0	10	0	0	0	0	0	0	0	0	ruminants birds	NA	ERS3416286 (SAMEA5612098)
ALQ018756	Plate 08	P160553	UZ025907	MBO013CAP5	goat	ruminant	livestock	MBO013	13/10/2015	MBOTELA	240	5	-1.298876667	36.86243	yes	ALQ018756	446	446	NA	0	0	7	0	0	0	0	0	0	0	0	0	0	0	0	0	0	ruminants	NA	ERS3414709 (SAMEA5610519)
PL015105	Plate 11	P160719	UZ025323	MBO013ROD1	rodent	w_mammal	wildlife	MBO013	13/10/2015	MBOTELA	240	5	-1.298876667	36.86243	yes	PL015105	446	446	NA	0	0	7	0	0	0	0	0	0	0	0	0	0	0	0	0	0	ruminants	NA	ERS3415494 (SAMEA5611305)
ALQ019778	Plate 04	P160305	UZ026652	KYL025CAP9	goat	ruminant	livestock	KYL025	16/11/2015	KAYOLE	313	6	-1.265657435	36.91767563	yes	ALQ019778	442	442	NA	0	1	14	0	0	0	0	0	0	0	0	2	0	0	0	0	0	ruminants birds	NA	ERS3414775 (SAMEA5610585)
TMP020512	Plate 15	P160810	UZ029979	KWG070OVN2	sheep	ruminant	livestock	KWG070	04/07/2016	KAWANGWARE	260	6	-1.278915	36.74525167	yes	TMP020512	442	442	NA	0	1	22	0	25	0	0	0	0	0	0	0	0	0	0	0	0	ruminants	NA	ERS3415973 (SAMEA5611784)
TMP020998	Plate 13	P160720	UZ022034	GTN073AVN4	avian	w_avian	wildlife	GTN073	12/07/2016	GATINA	260	6	-1.27637736	36.75747462	yes	TMP020998	442	442	NA	0	4	0	0	0	0	0	0	6	0	0	0	0	0	0	0	0	ruminants birds	NA	ERS3416028 (SAMEA5611839)
TMP022740	Plate 21	P170066	UZ035045	NGN079AVN3	avian	w_avian	wildlife	NGN079	08/08/2016	NGUNDU	270	5	-1.268731667	37.06599	yes	TMP022740	442	442	NA	6	0	0	0	10	0	0	0	3	0	0	0	0	0	0	0	0	ruminants birds other	NA	ERS3416123 (SAMEA5611935)
ALQ020094	Plate 03	P160305	UZ026482	UTH028BOV5	bovine	ruminant	livestock	UTH028	30/11/2015	UTHIRU	260	6	-1.263931667	36.70259	yes	ALQ020094	441	441	NA	0	7	0	0	0	0	0	0	0	0	0	0	0	0	0	0	0	ruminants	NA	ERS3414819 (SAMEA5610629)
TMP021647	Plate 12	P160719	UZ028240	KHW050CAP3	goat	ruminant	livestock	KHW050	06/04/2016	KAHAWA WEST / JUJA K	311	6	-1.179393235	36.90742073	yes	TMP021647	423	423	NA	0	0	4	11	0	0	0	0	20	0	0	0	14	4	5	0	0	ruminants birds	NA	ERS3416089 (SAMEA5611900)
INT007160	Plate 09	P160554	UZ028125	MWK055AV_POP2	av_pop	w_avian	wildlife	MWK055	26/04/2016	MWIKI	313	6	-1.23016808	36.93353817	no	INT007160	410	410	NA	0	0	0	0	0	0	0	0	0	0	0	0	0	0	0	0	0	none	NA	ERS3415333 (SAMEA5611143)
ALQ028136	Plate 11	P160719	UZ028365	LUM054CAP1	goat	ruminant	livestock	LUM054	13/04/2016	LUMUMBA (JERICHO)	220	6	-1.293103333	36.871635	yes	ALQ028136	409	409	NA	0	0	44	0	0	0	0	0	5	0	0	12	0	0	0	0	0	ruminants birds	NA	ERS3414896 (SAMEA5610706)
INT004464	Plate 06	P160465	UZ027094	UMJ035HUM4	human	human	human	UMJ035	26/01/2016	UMOJA	212	4	-1.282928333	36.88523333	yes	INT004464	409	409	NA	0	0	0	0	0	0	0	0	15	0	0	0	0	0	0	0	0	birds	NA	ERS3415098 (SAMEA5610908)
PLQ000951	Plate 18	P160773	UZ035178	MUT084BAT2	bat	w_bat	wildlife	MUT084	17/08/2016	MUTHANGARI	110	2	-1.265065	36.78292	yes	PLQ000951	409	409	NA	0	0	0	2	0	0	0	0	2	0	0	0	0	0	0	0	0	ruminants birds	NA	ERS3415579 (SAMEA5611390)
TMP019155	Plate 01	P160078	UZ026074	MAK017GAL2	chickens	poultry	livestock	MAK017	27/10/2015	MAKONGENI	230	6	-1.298248333	36.84727333	yes	TMP019155	409	409	NA	0	0	0	0	0	0	5	1	30	0	0	0	0	0	0	0	0	monogastrics birds	NA	ERS3415838 (SAMEA5611649)
TMP020063	Plate 01	P160078	UZ026076	MAK017HUM1	human	human	human	MAK017	27/10/2015	MAKONGENI	230	6	-1.298248333	36.84727333	yes	TMP020063	409	409	NA	0	0	0	0	0	0	5	1	30	0	0	0	0	0	0	0	0	monogastrics birds	NA	ERS3415953 (SAMEA5611764)
TMP020796	Plate 14	P160720	UZ029446	KWG071AVN2	avian	w_avian	wildlife	KWG071	05/07/2016	KAWANGWARE	260	6	-1.280645	36.74687667	yes	TMP020796	409	409	NA	0	0	22	0	3	1	2	0	0	0	0	0	3	0	2	0	0	ruminants monogastrics birds	NA	ERS3415997 (SAMEA5611808)
TMP024025	Plate 19	P160812	UZ030951	LOR097HUM8	human	human	human	LOR097	27/09/2016	LORESHO	110	1	-1.247168333	36.764595	yes	TMP024025	409	409	NA	0	0	0	0	0	0	0	0	13	0	0	0	0	16	0	0	0	birds	NA	ERS3416177 (SAMEA5611989)
TMP021179	Plate 13	P160720	UZ022295	GWK076HUM1	human	human	human	GWK076	19/07/2016	GATWIKIRA	312	7	-1.31708	36.77864167	yes	TMP021179	405	405	NA	0	0	0	0	0	20	0	0	0	0	16	0	0	0	0	0	0	monogastrics birds	NA	ERS3416054 (SAMEA5611865)
INT005352	Plate 06	P160465	UZ028065	KHW051HUM2	human	human	human	KHW051	04/04/2016	KAHAWA WEST / JUJA K	311	6	-1.180833333	36.91151833	no	INT005352	401	401	NA	0	0	0	0	0	0	0	0	0	0	0	0	0	0	0	0	0	none	NA	ERS3415219 (SAMEA5611029)
TMP021191	Plate 21	P170066	UZ035005	GWK076AVN1	avian	w_avian	wildlife	GWK076	19/07/2016	GATWIKIRA	312	7	-1.31708	36.77864167	yes	TMP021191	401	401	NA	0	0	0	0	0	20	0	0	0	0	16	0	0	0	0	0	0	monogastrics birds	NA	ERS3416056 (SAMEA5611867)
TMP019659	Plate 12	P160719	UZ025970	MLK023ROD4	rodent	w_mammal	wildlife	MLK023	10/11/2015	MLANGO KUBWA	312	7	-1.264538333	36.85216167	yes	TMP019659	399	399	NA	0	26	2	0	4	0	0	0	0	0	0	0	0	0	0	0	0	ruminants	NA	ERS3415902 (SAMEA5611713)
ALQ018670	Plate 01	P160078	UZ025849	MBO014ANA4	ducks	poultry	livestock	MBO014	12/10/2015	MBOTELA	240	5	-1.298803333	36.86333833	yes	ALQ018670	398	398	NA	0	0	0	0	0	0	3	3	12	0	0	8	0	3	0	0	0	monogastrics birds	NA	ERS3414704 (SAMEA5610514)
ALQ018940	Plate 08	P160553	UZ026053	MAK017GAL7	chickens	poultry	livestock	MAK017	27/10/2015	MAKONGENI	230	6	-1.298248333	36.84727333	yes	ALQ018940	398	398	NA	0	0	0	0	0	0	5	1	30	0	0	0	0	0	0	0	0	monogastrics birds	NA	ERS3414716 (SAMEA5610526)
ALQ023285	Plate 07	P160553	UZ027604	SPV064AVN9	avian	w_avian	wildlife	SPV064	23/05/2016	SPRING VALLEY	110	2	-1.253818333	36.790205	yes	ALQ023285	398	398	NA	0	1	0	3	5	0	6	0	4	0	0	0	3	0	1	0	0	ruminants monogastrics birds	NA	ERS3414877 (SAMEA5610687)
ALQ028100	Plate 12	P160719	UZ028346	LUM054CAP6	goat	ruminant	livestock	LUM054	13/04/2016	LUMUMBA (JERICHO)	220	6	-1.293103333	36.871635	yes	ALQ028100	398	398	NA	0	0	44	0	0	0	0	0	5	0	0	12	0	0	0	0	0	ruminants birds	NA	ERS3414895 (SAMEA5610705)
ALQ032820	Plate 14	P160720	UZ030174	MUT084HUM3	human	human	human	MUT084	17/08/2016	MUTHANGARI	110	2	-1.265065	36.78292	yes	ALQ032820	398	398	NA	0	0	0	2	0	0	0	0	2	0	0	0	0	0	0	0	0	ruminants birds	NA	ERS3414933 (SAMEA5610743)
INT003457	Plate 10	P160554	UZ027501	KIL041GAL3	chickens	poultry	livestock	KIL041	08/03/2016	KILIMANI	110	2	-1.291786185	36.78376162	yes	INT003457	398	398	NA	0	0	0	3	3	0	33	0	167	0	0	6	3	4	6	0	0	ruminants monogastrics birds	NA	ERS3415028 (SAMEA5610838)
INT007688	Plate 14	P160720	UZ028764	KOR058OVN1	sheep	ruminant	livestock	KOR058	09/05/2016	NYAYO (KOROGOCHO)	312	7	-1.25093	36.88799667	yes	INT007688	398	398	NA	0	0	17	0	1	0	0	0	20	0	0	3	0	0	0	0	0	ruminants birds	NA	ERS3415383 (SAMEA5611194)
INT010134	Plate 17	P160773	UZ030676	SPV100ANA2	geese	poultry	livestock	SPV100	05/10/2016	SPRING VALLEY	110	2	-1.254815	36.77469833	yes	INT010134	398	398	NA	0	0	0	0	0	0	4	0	1	0	0	9	4	1	1	70	0	monogastrics birds	NA	ERS3415474 (SAMEA5611285)
PL015075	Plate 02	P160078	UZ2004461	MBO013AVN3	avian	w_avian	wildlife	MBO013	13/10/2015	MBOTELA	240	5	-1.298876667	36.86243	yes	PL015075	398	398	NA	0	0	7	0	0	0	0	0	0	0	0	0	0	0	0	0	0	ruminants	NA	ERS3415489 (SAMEA5611300)
PLQ000865	Plate 16	P160810	UZ022172	MUT082GAL3	chickens	poultry	livestock	MUT082	15/08/2016	MUTHANGARI	110	2	-1.2663	36.782315	yes	PLQ000865	398	398	NA	0	2	0	1	0	0	3	0	13	0	0	0	0	0	0	0	0	ruminants monogastrics birds	NA	ERS3415569 (SAMEA5611380)
TMP019223	Plate 04	P160305	UZ2004413	MAK018AVN8	avian	w_avian	wildlife	MAK018	27/10/2015	MAKONGENI	230	6	-1.296248	36.851973	no	TMP019223	398	398	NA	0	0	0	0	0	0	0	0	0	0	0	0	0	0	0	0	0	none	NA	ERS3415847 (SAMEA5611658)
TMP021184	Plate 21	P170066	UZ035007	GWK076AVN4	avian	w_avian	wildlife	GWK076	19/07/2016	GATWIKIRA	312	7	-1.31708	36.77864167	yes	TMP021184	398	398	NA	0	0	0	0	0	20	0	0	0	0	16	0	0	0	0	0	0	monogastrics birds	NA	ERS3416055 (SAMEA5611866)
TMP021584	Plate 15	P160810	UZ027428	LUM053AVN3	avian	w_avian	wildlife	LUM053	12/04/2016	LUMUMBA (JERICHO)	220	6	-1.292383333	36.87426	yes	TMP021584	398	398	NA	0	0	0	0	0	0	0	0	15	0	0	0	0	0	0	0	0	birds	NA	ERS3416085 (SAMEA5611896)
TWAG1922	Plate 18	P160773	UZ030856	MGM094GAL2	chickens	poultry	livestock	MGM094	19/09/2016	MUGUMOINI	212	4	-1.326458333	36.78585167	yes	TWAG1922	398	398	NA	0	0	0	0	0	0	0	0	3	0	0	0	0	0	0	0	0	birds	NA	ERS3416292 (SAMEA5612104)
INT004834	Plate 06	P160465	UZ027271	KRR039GAL4	chickens	poultry	livestock	KRR039	22/02/2016	KARURA	120	2	-1.224276667	36.82658833	yes	INT004834	394	394	NA	0	0	0	0	0	0	0	0	0	0	700	0	0	0	0	0	0	birds	NA	ERS3415150 (SAMEA5610960)
INT005399	Plate 05	P160465	UZ027457	STC047AVN3	avian	w_avian	wildlife	STC047	22/03/2016	SOUTH C	211	3	-1.325503333	36.82077667	yes	INT005399	394	394	NA	0	0	0	0	0	0	0	0	6	0	0	0	0	0	0	0	0	birds	NA	ERS3415223 (SAMEA5611033)
TMP019567	Plate 04	P160305	UZ026246	KIG020HUM2	human	human	human	KIG020	03/11/2015	KIRIGU	260	6	-1.29399	36.704215	yes	TMP019567	394	394	NA	0	3	2	0	0	0	0	0	3	0	0	0	0	0	0	0	0	ruminants birds	NA	ERS3415892 (SAMEA5611703)
TMP024012	Plate 19	P160812	UZ031033	LOR097HUM2	human	human	human	LOR097	27/09/2016	LORESHO	110	1	-1.247168333	36.764595	yes	TMP024012	394	394	NA	0	0	0	0	0	0	0	0	13	0	0	0	0	16	0	0	0	birds	NA	ERS3416175 (SAMEA5611987)
INT007079	Plate 06	P160465	UZ028358	LUM054CAP5	goat	ruminant	livestock	LUM054	13/04/2016	LUMUMBA (JERICHO)	220	6	-1.293103333	36.871635	yes	INT007079	388	388	NA	0	0	44	0	0	0	0	0	5	0	0	12	0	0	0	0	0	ruminants birds	NA	ERS3415323 (SAMEA5611133)
TMP016392	Plate 02	P160078	UZ025656	KAN008HUM1	human	human	human	KAN008	22/09/2015	KAREN	110	1	-1.338961667	36.70231333	yes	TMP016392	388	388	NA	0	0	0	0	0	0	0	0	140	0	0	0	0	0	0	0	0	birds	NA	ERS3415731 (SAMEA5611542)
TMP019979	Plate 02	P160078	UZ026042	MAK017AVN7	avian	w_avian	wildlife	MAK017	27/10/2015	MAKONGENI	230	6	-1.298248333	36.84727333	yes	TMP019979	388	388	NA	0	0	0	0	0	0	5	1	30	0	0	0	0	0	0	0	0	monogastrics birds	NA	ERS3415941 (SAMEA5611752)
INT004454	Plate 16	P160810	UZ027079	UMJ035HUM1	human	human	human	UMJ035	26/01/2016	UMOJA	212	4	-1.282928333	36.88523333	yes	INT004454	382	382	NA	0	0	0	0	0	0	0	0	15	0	0	0	0	0	0	0	0	birds	NA	ERS3415097 (SAMEA5610907)
ALQ023111	Plate 13	P160720	UZ028685	KAS061ROD1	rodent	w_mammal	wildlife	KAS061	16/05/2016	KASARANI	321	5	-1.223748333	36.92381333	yes	ALQ023111	372	372	NA	0	0	3	0	0	10	0	0	9	0	0	0	0	0	0	0	0	ruminants monogastrics birds	NA	ERS3414854 (SAMEA5610664)
PLQ000985	Plate 17	P160773	UZ035161	MUT083AVN7	avian	w_avian	wildlife	MUT083	16/08/2016	MUTHANGARI	110	2	-1.263035	36.79185	no	PLQ000985	372	372	NA	0	0	0	0	0	0	0	0	0	0	0	0	0	0	0	0	0	none	NA	ERS3415584 (SAMEA5611395)
TMP019549	Plate 15	P160810	UZ025956	KIG019BAT1	bat	w_bat	wildlife	KIG019	02/11/2015	KIRIGU	260	6	-1.291726667	36.70118333	yes	TMP019549	372	372	NA	0	0	16	0	0	2	0	0	5	0	0	0	0	0	0	0	0	ruminants monogastrics birds	NA	ERS3415890 (SAMEA5611701)
TMP020977	Plate 13	P160720	UZ021953	GTN073HUM1	human	human	human	GTN073	12/07/2016	GATINA	260	6	-1.27637736	36.75747462	yes	TMP020977	372	372	NA	0	4	0	0	0	0	0	0	6	0	0	0	0	0	0	0	0	ruminants birds	NA	ERS3416025 (SAMEA5611836)
TWAG00379	Plate 09	P160554	UZ029631	MIH069HUM3	human	human	human	MIH069	13/06/2016	MIHANGO	270	5	-1.273078333	36.95491	no	TWAG00379	372	372	NA	0	0	0	0	0	0	0	0	0	0	0	0	0	0	0	0	0	none	NA	ERS3416251 (SAMEA5612063)
TMP016212	Plate 02	P160078	UZ025213	MSA004BOV2	bovine	ruminant	livestock	MSA004	14/09/2015	MOWLEM = SAIKA	311	6	-1.245281667	36.92033333	yes	TMP016212	366	366	NA	0	5	0	0	0	7	4	0	20	0	0	0	0	0	0	0	0	ruminants monogastrics birds other	NA	ERS3415710 (SAMEA5611521)
INT007172	Plate 09	P160554	UZ028109	MWK055AV_POP4	av_pop	w_avian	wildlife	MWK055	26/04/2016	MWIKI	313	6	-1.23016808	36.93353817	no	INT007172	362	362	NA	0	0	0	0	0	0	0	0	0	0	0	0	0	0	0	0	0	none	NA	ERS3415335 (SAMEA5611145)
ALQ019794	Plate 11	P160719	UZ2004622	KYL027AVN6	avian	w_avian	wildlife	KYL027	17/11/2015	KAYOLE	313	6	-1.273571667	36.91366667	no	ALQ019794	361	361	NA	0	0	0	0	0	0	0	0	0	0	0	0	0	0	0	0	0	none	NA	ERS3414776 (SAMEA5610586)
ALQ019828	Plate 10	P160554	UZ026887	UTH029GAL4	chickens	poultry	livestock	UTH029	02/12/2015	UTHIRU	260	6	-1.259986667	36.70342	yes	ALQ019828	361	361	NA	0	0	0	6	0	0	0	0	115	0	0	0	0	0	0	0	0	ruminants birds	NA	ERS3414781 (SAMEA5610591)
PLQ000249	Plate 17	P160773	UZ035090	MUT084AVN2	avian	w_avian	wildlife	MUT084	17/08/2016	MUTHANGARI	110	2	-1.265065	36.78292	yes	PLQ000249	357	357	NA	0	0	0	2	0	0	0	0	2	0	0	0	0	0	0	0	0	ruminants birds	NA	ERS3415513 (SAMEA5611324)
TMP019701	Plate 11	P160719	UZ026286	KIG021AVN3	avian	w_avian	wildlife	KIG021	03/11/2015	KIRIGU	260	6	-1.288618333	36.69824333	no	TMP019701	357	357	NA	0	0	0	0	0	0	0	0	0	0	0	0	0	0	0	0	0	none	NA	ERS3415903 (SAMEA5611714)
INT005662	Plate 05	P160465	UZ027980	KHW049HUM2	human	human	human	KHW049	05/04/2016	KAHAWA WEST / JUJA K	311	6	-1.179655	36.90618833	yes	INT005662	351	351	NA	0	5	0	0	0	0	0	0	18	0	0	0	0	0	0	0	0	ruminants birds	NA	ERS3415260 (SAMEA5611070)
INT010116	Plate 17	P160773	UZ030693	SPV100GAL1	chickens	poultry	livestock	SPV100	05/10/2016	SPRING VALLEY	110	2	-1.254815	36.77469833	yes	INT010116	351	351	NA	0	0	0	0	0	0	4	0	1	0	0	9	4	1	1	70	0	monogastrics birds	NA	ERS3415471 (SAMEA5611282)
TMP017068	Plate 02	P160078	UZ025834	MBO014LAG1	rabbit	monogastric	livestock	MBO014	12/10/2015	MBOTELA	240	5	-1.298803333	36.86333833	yes	TMP017068	351	351	NA	0	0	0	0	0	0	3	3	12	0	0	8	0	3	0	0	0	monogastrics birds	NA	ERS3415784 (SAMEA5611595)
TMP020909	Plate 14	P160720	UZ022083	GTN073BOV1	bovine	ruminant	livestock	GTN073	12/07/2016	GATINA	260	6	-1.27637736	36.75747462	yes	TMP020909	351	351	NA	0	4	0	0	0	0	0	0	6	0	0	0	0	0	0	0	0	ruminants birds	NA	ERS3416014 (SAMEA5611825)
ALQ019939	Plate 04	P160305	UZ026776	KYL026GAL7	chickens	poultry	livestock	KYL026	24/11/2015	KAYOLE	313	6	-1.276371667	36.920625	yes	ALQ019939	349	349	NA	0	0	0	0	0	14	0	0	40	0	0	0	0	0	0	0	0	monogastrics birds	NA	ERS3414797 (SAMEA5610607)
INT004588	Plate 05	P160465	UZ027173	UMJ036HUM2	human	human	human	UMJ036	27/01/2016	UMOJA	212	4	-1.278311667	36.88803	yes	INT004588	349	349	NA	0	0	5	0	0	0	28	0	24	0	0	0	0	0	3	0	0	ruminants monogastrics birds	NA	ERS3415118 (SAMEA5610928)
TWAG1933	Plate 17	P160773	UZ030852	MGM094GAL1	chickens	poultry	livestock	MGM094	19/09/2016	MUGUMOINI	212	4	-1.326458333	36.78585167	yes	TWAG1933	348	348	NA	0	0	0	0	0	0	0	0	3	0	0	0	0	0	0	0	0	birds	NA	ERS3416294 (SAMEA5612106)
INT003681	Plate 03	P160305	UZ027262	KRR039HUM4	human	human	human	KRR039	22/02/2016	KARURA	120	2	-1.224276667	36.82658833	yes	INT003681	345	345	NA	0	0	0	0	0	0	0	0	0	0	700	0	0	0	0	0	0	birds	NA	ERS3415036 (SAMEA5610846)
INT004955	Plate 21	P170066	UZ2004867	KIL042AVN8	avian	w_avian	wildlife	KIL042	09/03/2016	KILIMANI	130	2	-1.297515	36.78249167	yes	INT004955	345	345	NA	0	0	6	0	0	0	0	0	6	0	0	0	0	0	0	0	0	ruminants birds	NA	ERS3415166 (SAMEA5610976)
TMP016092	Plate 02	P160078	UZ025205	VIW002CAP6	goat	ruminant	livestock	VIW002	01/09/2015	VIWANDANI	312	7	-1.309915	36.878755	yes	TMP016092	345	345	NA	0	3	0	0	0	15	3	0	5	0	0	0	0	0	0	0	0	ruminants monogastrics birds	NA	ERS3415695 (SAMEA5611506)
TMP019994	Plate 01	P160078	UZ026115	MAK018HUM2	human	human	human	MAK018	27/10/2015	MAKONGENI	230	6	-1.296248	36.851973	no	TMP019994	345	345	NA	0	0	0	0	0	0	0	0	0	0	0	0	0	0	0	0	0	none	NA	ERS3415943 (SAMEA5611754)
PLQ000861	Plate 16	P160810	UZ022265	MUT082GAL1	chickens	poultry	livestock	MUT082	15/08/2016	MUTHANGARI	110	2	-1.2663	36.782315	yes	PLQ000861	337	337	NA	0	2	0	1	0	0	3	0	13	0	0	0	0	0	0	0	0	ruminants monogastrics birds	NA	ERS3415568 (SAMEA5611379)
TMP023838	Plate 17	P160773	UZ030321	MGM095AVN3	avian	w_avian	wildlife	MGM095	20/09/2016	MUGUMOINI	212	4	-1.32085454	36.7856738	no	TMP023838	337	337	NA	0	0	0	0	0	0	0	0	0	0	0	0	0	0	0	0	0	none	NA	ERS3416148 (SAMEA5611960)
INT007414	Plate 08	P160553	UZ028300	MWK056ANA2	ducks	poultry	livestock	MWK056	03/05/2016	MWIKI	313	6	-1.231583333	36.93017333	yes	INT007414	336	336	NA	0	0	4	0	0	10	0	0	0	0	0	7	0	0	0	0	0	ruminants monogastrics birds	NA	ERS3415344 (SAMEA5611154)
INT006303	Plate 16	P160810	UZ029521	MIH067GAL4	chickens	poultry	livestock	MIH067	07/06/2016	MIHANGO	270	5	-1.273335	36.944275	yes	INT006303	332	332	NA	0	3	0	0	0	0	0	0	30	0	0	0	0	11	0	0	0	ruminants birds	NA	ERS3415310 (SAMEA5611120)
ALQ017189	Plate 12	P160719	UZ027567	KIL042CAP1	goat	ruminant	livestock	KIL042	09/03/2016	KILIMANI	130	2	-1.297515	36.78249167	yes	ALQ017189	297	297	NA	0	0	6	0	0	0	0	0	6	0	0	0	0	0	0	0	0	ruminants birds	NA	ERS3414673 (SAMEA5610483)
ALQ017244	Plate 09	P160554	UZ025773	HAR011LAG8	rabbit	monogastric	livestock	HAR011	05/10/2015	HARAMBEE	211	3	-1.287711667	36.87792167	yes	ALQ017244	297	297	NA	0	0	0	0	0	0	40	0	0	0	0	0	0	0	0	0	0	monogastrics birds	NA	ERS3414678 (SAMEA5610488)
ALQ019817	Plate 04	P160305	UZ026705	UTH029AVN3	avian	w_avian	wildlife	UTH029	02/12/2015	UTHIRU	260	6	-1.259986667	36.70342	yes	ALQ019817	297	297	NA	0	0	0	6	0	0	0	0	115	0	0	0	0	0	0	0	0	ruminants birds	NA	ERS3414779 (SAMEA5610589)
ALQ023216	Plate 08	P160553	UZ028837	SPV064CAP2	goat	ruminant	livestock	SPV064	23/05/2016	SPRING VALLEY	110	2	-1.253818333	36.790205	yes	ALQ023216	297	297	NA	0	1	0	3	5	0	6	0	4	0	0	0	3	0	1	0	0	ruminants monogastrics birds	NA	ERS3414867 (SAMEA5610677)
ALQ028781	Plate 11	P160719	UZ028834	SPV064OVN3	sheep	ruminant	livestock	SPV064	23/05/2016	SPRING VALLEY	110	2	-1.253818333	36.790205	yes	ALQ028781	297	297	NA	0	1	0	3	5	0	6	0	4	0	0	0	3	0	1	0	0	ruminants monogastrics birds	NA	ERS3414915 (SAMEA5610725)
ECL000753	Plate 10	P160554	UZ027335	KIL042BAT1	bat	w_bat	wildlife	KIL042	09/03/2016	KILIMANI	130	2	-1.297515	36.78249167	yes	ECL000753	297	297	NA	0	0	6	0	0	0	0	0	6	0	0	0	0	0	0	0	0	ruminants birds	NA	ERS3414986 (SAMEA5610796)
INT003921	Plate 21	P170066	UZ026323	DANBATBAT3	bat	w_bat	wildlife	DANBAT	NA	NA	NA	NA	NA	NA	NA	INT003921	297	297	NA	NA	NA	NA	NA	NA	NA	NA	NA	NA	NA	NA	NA	NA	NA	NA	NA	NA	NA	NA	ERS3415050 (SAMEA5610860)
INT004567	Plate 05	P160465	UZ027134	UMJ036CAP2	goat	ruminant	livestock	UMJ036	27/01/2016	UMOJA	212	4	-1.278311667	36.88803	yes	INT004567	297	297	NA	0	0	5	0	0	0	28	0	24	0	0	0	0	0	3	0	0	ruminants monogastrics birds	NA	ERS3415115 (SAMEA5610925)
INT004879	Plate 05	P160465	UZ027516	KIL041OVN2	sheep	ruminant	livestock	KIL041	08/03/2016	KILIMANI	110	2	-1.291786185	36.78376162	yes	INT004879	297	297	NA	0	0	0	3	3	0	33	0	167	0	0	6	3	4	6	0	0	ruminants monogastrics birds	NA	ERS3415156 (SAMEA5610966)
INT005029	Plate 05	P160465	UZ027555	KIL042CAP3	goat	ruminant	livestock	KIL042	09/03/2016	KILIMANI	130	2	-1.297515	36.78249167	yes	INT005029	297	297	NA	0	0	6	0	0	0	0	0	6	0	0	0	0	0	0	0	0	ruminants birds	NA	ERS3415176 (SAMEA5610986)
INT005152	Plate 05	P160465	UZ2004825	EAS043AVN2	avian	w_avian	wildlife	EAS043	14/03/2016	EASTLEIGH NORTH	330	5	-1.266996667	36.84912833	yes	INT005152	297	297	NA	0	0	0	0	0	0	0	0	8	0	0	0	0	0	0	0	0	birds	NA	ERS3415191 (SAMEA5611001)
INT005315	Plate 06	P160465	UZ027709	STC046HUM1	human	human	human	STC046	22/03/2016	SOUTH C	211	3	-1.325046667	36.81989167	yes	INT005315	297	297	NA	0	0	0	0	0	0	0	0	9	0	0	0	0	0	0	0	0	birds	NA	ERS3415214 (SAMEA5611024)
INT005745	Plate 06	P160465	UZ027405	KHW050AVN8	avian	w_avian	wildlife	KHW050	06/04/2016	KAHAWA WEST / JUJA K	311	6	-1.179393235	36.90742073	yes	INT005745	297	297	NA	0	0	4	11	0	0	0	0	20	0	0	0	14	4	5	0	0	ruminants birds	NA	ERS3415272 (SAMEA5611082)
INT005802	Plate 06	P160465	UZ028233	KHW050CAP1	goat	ruminant	livestock	KHW050	06/04/2016	KAHAWA WEST / JUJA K	311	6	-1.179393235	36.90742073	yes	INT005802	297	297	NA	0	0	4	11	0	0	0	0	20	0	0	0	14	4	5	0	0	ruminants birds	NA	ERS3415278 (SAMEA5611088)
INT007541	Plate 07	P160553	UZ028738	MWK057CAP3	goat	ruminant	livestock	MWK057	05/05/2016	MWIKI	313	6	-1.229788913	36.92984478	yes	INT007541	297	297	NA	0	0	4	0	0	11	0	0	4	0	0	16	0	0	0	0	0	ruminants monogastrics birds	NA	ERS3415362 (SAMEA5611173)
INT007592	Plate 07	P160553	UZ028770	MWK057CAP2	goat	ruminant	livestock	MWK057	05/05/2016	MWIKI	313	6	-1.229788913	36.92984478	yes	INT007592	297	297	NA	0	0	4	0	0	11	0	0	4	0	0	16	0	0	0	0	0	ruminants monogastrics birds	NA	ERS3415371 (SAMEA5611182)
INT007668	Plate 08	P160553	UZ028745	KOR058CAP1	goat	ruminant	livestock	KOR058	09/05/2016	NYAYO (KOROGOCHO)	312	7	-1.25093	36.88799667	yes	INT007668	297	297	NA	0	0	17	0	1	0	0	0	20	0	0	3	0	0	0	0	0	ruminants birds	NA	ERS3415379 (SAMEA5611190)
INT007896	Plate 07	P160553	UZ029154	KAS061CAP1	goat	ruminant	livestock	KAS061	16/05/2016	KASARANI	321	5	-1.223748333	36.92381333	yes	INT007896	297	297	NA	0	0	3	0	0	10	0	0	9	0	0	0	0	0	0	0	0	ruminants monogastrics birds	NA	ERS3415410 (SAMEA5611221)
INT007914	Plate 08	P160553	UZ029216	KAS061CAP2	goat	ruminant	livestock	KAS061	16/05/2016	KASARANI	321	5	-1.223748333	36.92381333	yes	INT007914	297	297	NA	0	0	3	0	0	10	0	0	9	0	0	0	0	0	0	0	0	ruminants monogastrics birds	NA	ERS3415413 (SAMEA5611224)
PL015033	Plate 01	P160078	UZ025902	MBO013CAP4	goat	ruminant	livestock	MBO013	13/10/2015	MBOTELA	240	5	-1.298876667	36.86243	yes	PL015033	297	297	NA	0	0	7	0	0	0	0	0	0	0	0	0	0	0	0	0	0	ruminants	NA	ERS3415482 (SAMEA5611293)
PLQ000847	Plate 15	P160810	UZ022262	MUT082CAP1	goat	ruminant	livestock	MUT082	15/08/2016	MUTHANGARI	110	2	-1.2663	36.782315	yes	PLQ000847	297	297	NA	0	2	0	1	0	0	3	0	13	0	0	0	0	0	0	0	0	ruminants monogastrics birds	NA	ERS3415567 (SAMEA5611378)
TMP014928	Plate 07	P160553	UZ025209	VIW002CAP4	goat	ruminant	livestock	VIW002	01/09/2015	VIWANDANI	312	7	-1.309915	36.878755	yes	TMP014928	297	297	NA	0	3	0	0	0	15	3	0	5	0	0	0	0	0	0	0	0	ruminants monogastrics birds	NA	ERS3415633 (SAMEA5611444)
TMP015485	Plate 09	P160554	UZ025241	VIW002LAG1	rabbit	monogastric	livestock	VIW002	01/09/2015	VIWANDANI	312	7	-1.309915	36.878755	yes	TMP015485	297	297	NA	0	3	0	0	0	15	3	0	5	0	0	0	0	0	0	0	0	ruminants monogastrics birds	NA	ERS3415669 (SAMEA5611480)
TMP016655	Plate 01	P160078	UZ025336	VIW003AVN2	avian	w_avian	wildlife	VIW003	08/09/2015	VIWANDANI	312	7	-1.300886667	36.88674	no	TMP016655	297	297	NA	0	0	0	0	0	0	0	0	0	0	0	0	0	0	0	0	0	none	NA	ERS3415756 (SAMEA5611567)
TMP018641	Plate 07	P160553	UZ026656	KYL025CAP6	goat	ruminant	livestock	KYL025	16/11/2015	KAYOLE	313	6	-1.265657435	36.91767563	yes	TMP018641	297	297	NA	0	1	14	0	0	0	0	0	0	0	0	2	0	0	0	0	0	ruminants birds	NA	ERS3415810 (SAMEA5611621)
TMP019456	Plate 12	P160719	UZ2004528	KIG020AVN6	avian	w_avian	wildlife	KIG020	03/11/2015	KIRIGU	260	6	-1.29399	36.704215	yes	TMP019456	297	297	NA	0	3	2	0	0	0	0	0	3	0	0	0	0	0	0	0	0	ruminants birds	NA	ERS3415879 (SAMEA5611690)
TMP020748	Plate 10	P160554	UZ028245	KWG071CAP2	goat	ruminant	livestock	KWG071	05/07/2016	KAWANGWARE	260	6	-1.280645	36.74687667	yes	TMP020748	297	297	NA	0	0	22	0	3	1	2	0	0	0	0	0	3	0	2	0	0	ruminants monogastrics birds	NA	ERS3415989 (SAMEA5611800)
TMP021048	Plate 19	P160812	UZ022333	GTN074GAL1	chickens	poultry	livestock	GTN074	13/07/2016	GATINA	260	6	-1.291341667	36.75221	yes	TMP021048	297	297	NA	0	0	0	0	3	0	0	0	7	0	0	0	0	0	0	0	0	ruminants birds	NA	ERS3416036 (SAMEA5611847)
TMP024209	Plate 17	P160773	UZ030959	LOR098OVN1	sheep	ruminant	livestock	LOR098	28/09/2016	LORESHO	120	1	-1.24741938	36.7508106	yes	TMP024209	297	297	NA	0	0	3	0	1	0	0	0	21	14	0	2	0	0	0	0	0	ruminants birds	NA	ERS3416204 (SAMEA5612016)
TWAG00351	Plate 21	P170066	UZ029371	SPV065ROD1	rodent	w_mammal	wildlife	SPV065	06/06/2016	SPRING VALLEY	120	2	-1.257883333	36.78655833	no	TWAG00351	297	297	NA	0	0	0	0	0	0	0	0	0	0	0	0	0	0	0	0	0	none	NA	ERS3416248 (SAMEA5612060)
TWAG1869	Plate 18	P160773	UZ030858	BOM092CAP5	goat	ruminant	livestock	BOM092	14/09/2016	BOMAS	211	3	-1.323251667	36.77964333	yes	TWAG1869	297	297	NA	0	0	13	0	0	0	0	0	10	0	0	0	0	0	0	0	0	ruminants birds	NA	ERS3416283 (SAMEA5612095)
TWAG1878	Plate 17	P160773	UZ030861	BOM092CAP4	goat	ruminant	livestock	BOM092	14/09/2016	BOMAS	211	3	-1.323251667	36.77964333	yes	TWAG1878	297	297	NA	0	0	13	0	0	0	0	0	10	0	0	0	0	0	0	0	0	ruminants birds	NA	ERS3416285 (SAMEA5612097)
ALQ023211	Plate 08	P160553	UZ028836	SPV064BOV1	bovine	ruminant	livestock	SPV064	23/05/2016	SPRING VALLEY	110	2	-1.253818333	36.790205	yes	ALQ023211	295	295	NA	0	1	0	3	5	0	6	0	4	0	0	0	3	0	1	0	0	ruminants monogastrics birds	NA	ERS3414866 (SAMEA5610676)
PL015094	Plate 02	P160078	UZ025752	MBO014HUM3	human	human	human	MBO014	12/10/2015	MBOTELA	240	5	-1.298803333	36.86333833	yes	PL015094	295	295	NA	0	0	0	0	0	0	3	3	12	0	0	8	0	3	0	0	0	monogastrics birds	NA	ERS3415492 (SAMEA5611303)
TMP015994	Plate 02	P160078	UZ025212	VIW002BOV1	bovine	ruminant	livestock	VIW002	01/09/2015	VIWANDANI	312	7	-1.309915	36.878755	yes	TMP015994	295	295	NA	0	3	0	0	0	15	3	0	5	0	0	0	0	0	0	0	0	ruminants monogastrics birds	NA	ERS3415687 (SAMEA5611498)
TMP018719	Plate 08	P160553	UZ026406	MLK023BOV8	bovine	ruminant	livestock	MLK023	10/11/2015	MLANGO KUBWA	312	7	-1.264538333	36.85216167	yes	TMP018719	295	295	NA	0	26	2	0	4	0	0	0	0	0	0	0	0	0	0	0	0	ruminants	NA	ERS3415814 (SAMEA5611625)
TMP021436	Plate 15	P160810	UZ028174	KHW050HUM7	human	human	human	KHW050	06/04/2016	KAHAWA WEST / JUJA K	311	6	-1.179393235	36.90742073	yes	TMP021436	295	295	NA	0	0	4	11	0	0	0	0	20	0	0	0	14	4	5	0	0	ruminants birds	NA	ERS3416078 (SAMEA5611889)
TWAG00196	Plate 08	P160553	UZ029546	MIH068HUM1	human	human	human	MIH068	08/06/2016	MIHANGO	270	5	-1.267946667	36.94829	yes	TWAG00196	295	295	NA	0	0	0	0	0	0	6	0	7	0	0	0	0	0	0	0	0	monogastrics birds	NA	ERS3416229 (SAMEA5612041)
INT003440	Plate 15	P160810	UZ027521	KIL041CAP2	goat	ruminant	livestock	KIL041	08/03/2016	KILIMANI	110	2	-1.291786185	36.78376162	yes	INT003440	278	278	NA	0	0	0	3	3	0	33	0	167	0	0	6	3	4	6	0	0	ruminants monogastrics birds	NA	ERS3415027 (SAMEA5610837)
TWAG1997	Plate 17	P160773	UZ022224	MGM094HUM5	human	human	human	MGM094	19/09/2016	MUGUMOINI	212	4	-1.326458333	36.78585167	yes	TWAG1997	278	278	NA	0	0	0	0	0	0	0	0	3	0	0	0	0	0	0	0	0	birds	NA	ERS3416305 (SAMEA5612117)
TMP016836	Plate 11	P160719	UZ025500	HAR010AVN7	avian	w_avian	wildlife	HAR010	06/10/2015	HARAMBEE	211	3	-1.293191667	36.88320833	yes	TMP016836	226	226	NA	0	0	0	0	0	0	0	0	5	0	0	0	0	0	0	0	0	birds	NA	ERS3415766 (SAMEA5611577)
TWAG00173	Plate 15	P160810	UZ029238	SPV065HUM3	human	human	human	SPV065	06/06/2016	SPRING VALLEY	120	2	-1.257883333	36.78655833	no	TWAG00173	226	226	NA	0	0	0	0	0	0	0	0	0	0	0	0	0	0	0	0	0	none	NA	ERS3416225 (SAMEA5612037)
TWAG00202	Plate 16	P160810	UZ029547	MIH068HUM2	human	human	human	MIH068	08/06/2016	MIHANGO	270	5	-1.267946667	36.94829	yes	TWAG00202	226	226	NA	0	0	0	0	0	0	6	0	7	0	0	0	0	0	0	0	0	monogastrics birds	NA	ERS3416230 (SAMEA5612042)
ALQ017149	Plate 13	P160720	UZ027542	KIL041LAG4	rabbit	monogastric	livestock	KIL041	08/03/2016	KILIMANI	110	2	-1.291786185	36.78376162	yes	ALQ017149	224	224	NA	0	0	0	3	3	0	33	0	167	0	0	6	3	4	6	0	0	ruminants monogastrics birds	NA	ERS3414671 (SAMEA5610481)
ALQ034933	Plate 17	P160773	UZ035194	KTS088ROD3	rodent	w_mammal	wildlife	KTS088	05/09/2016	KITISURU	110	1	-1.232017083	36.75897979	yes	ALQ034933	224	224	NA	0	4	0	0	0	0	0	0	7	5	0	6	7	0	0	0	0	ruminants birds	NA	ERS3414976 (SAMEA5610786)
INT005188	Plate 05	P160465	UZ027720	EAS044CAP4	goat	ruminant	livestock	EAS044	15/03/2016	EASTLEIGH NORTH	330	5	-1.268461667	36.84851	yes	INT005188	224	224	NA	0	0	5	0	0	0	0	0	0	0	0	0	0	0	2	0	0	ruminants birds	NA	ERS3415197 (SAMEA5611007)
INT005538	Plate 09	P160554	UZ2004918	KHW051AVN6	avian	w_avian	wildlife	KHW051	04/04/2016	KAHAWA WEST / JUJA K	311	6	-1.180833333	36.91151833	no	INT005538	224	224	NA	0	0	0	0	0	0	0	0	0	0	0	0	0	0	0	0	0	none	NA	ERS3415241 (SAMEA5611051)
INT007102	Plate 10	P160554	UZ028087	LUM054AVN8	avian	w_avian	wildlife	LUM054	13/04/2016	LUMUMBA (JERICHO)	220	6	-1.293103333	36.871635	yes	INT007102	224	224	NA	0	0	44	0	0	0	0	0	5	0	0	12	0	0	0	0	0	ruminants birds	NA	ERS3415326 (SAMEA5611136)
INT010030	Plate 17	P160773	UZ035246	SPV100ROD2	rodent	w_mammal	wildlife	SPV100	05/10/2016	SPRING VALLEY	110	2	-1.254815	36.77469833	yes	INT010030	224	224	NA	0	0	0	0	0	0	4	0	1	0	0	9	4	1	1	70	0	monogastrics birds	NA	ERS3415457 (SAMEA5611268)
PLQ2439	Plate 15	P160810	UZ030503	KTS089HUM4	human	human	human	KTS089	06/09/2016	KITISURU	110	1	-1.237836407	36.75603901	yes	PLQ2439	224	224	NA	0	0	0	0	0	0	0	0	0	7	0	0	0	0	0	0	0	birds	NA	ERS3415622 (SAMEA5611433)
TMP016528	Plate 02	P160078	UZ025220	MSA004SUI2	pig	monogastric	livestock	MSA004	14/09/2015	MOWLEM = SAIKA	311	6	-1.245281667	36.92033333	yes	TMP016528	224	224	NA	0	5	0	0	0	7	4	0	20	0	0	0	0	0	0	0	0	ruminants monogastrics birds other	NA	ERS3415747 (SAMEA5611558)
TMP019211	Plate 03	P160305	UZ2004433	MAK018AVN9	avian	w_avian	wildlife	MAK018	27/10/2015	MAKONGENI	230	6	-1.296248	36.851973	no	TMP019211	224	224	NA	0	0	0	0	0	0	0	0	0	0	0	0	0	0	0	0	0	none	NA	ERS3415845 (SAMEA5611656)
TMP024444	Plate 21	P170066	UZ030617	LOR099HUM7	human	human	human	LOR099	03/10/2016	LORESHO	120	1	-1.254446667	36.74716167	no	TMP024444	224	224	NA	0	0	0	0	0	0	0	0	0	0	0	0	0	0	0	0	0	none	NA	ERS3416220 (SAMEA5612032)
TWAG00330	Plate 10	P160554	UZ029340	MIH067AVN1	avian	w_avian	wildlife	MIH067	07/06/2016	MIHANGO	270	5	-1.273335	36.944275	yes	TWAG00330	224	224	NA	0	3	0	0	0	0	0	0	30	0	0	0	0	11	0	0	0	ruminants birds	NA	ERS3416245 (SAMEA5612057)
TWAG00365	Plate 21	P170066	UZ029345	MIH067AVN7	avian	w_avian	wildlife	MIH067	07/06/2016	MIHANGO	270	5	-1.273335	36.944275	yes	TWAG00365	224	224	NA	0	3	0	0	0	0	0	0	30	0	0	0	0	11	0	0	0	ruminants birds	NA	ERS3416249 (SAMEA5612061)
TMP018950	Plate 08	P160553	UZ026525	MLK024HUM2	human	human	human	MLK024	11/11/2015	MLANGO KUBWA	312	7	-1.26418	36.85309167	yes	TMP018950	224*	224	NA	0	0	0	0	0	0	0	0	8	0	0	7	0	0	0	0	0	birds	NA	ERS3415824 (SAMEA5611635)
ALQ019065	Plate 07	P160553	UZ026178	KIG019CAP3	goat	ruminant	livestock	KIG019	02/11/2015	KIRIGU	260	6	-1.291726667	36.70118333	yes	ALQ019065	223	223	NA	0	0	16	0	0	2	0	0	5	0	0	0	0	0	0	0	0	ruminants monogastrics birds	NA	ERS3414723 (SAMEA5610533)
ALQ019380	Plate 08	P160553	UZ026182	KIG019CAP7	goat	ruminant	livestock	KIG019	02/11/2015	KIRIGU	260	6	-1.291726667	36.70118333	yes	ALQ019380	223	223	NA	0	0	16	0	0	2	0	0	5	0	0	0	0	0	0	0	0	ruminants monogastrics birds	NA	ERS3414734 (SAMEA5610544)
ALQ034646	Plate 11	P160719	UZ030181	EMB085COL5	pigeons	poultry	livestock	EMB085	22/08/2016	EMBAKASI	211	4	-1.311076667	36.89346167	yes	ALQ034646	223	223	NA	0	0	0	0	0	0	0	0	300	0	0	0	0	0	0	26	0	birds	NA	ERS3414946 (SAMEA5610756)
INT007733	Plate 15	P160810	UZ028771	KOR058CAP2	goat	ruminant	livestock	KOR058	09/05/2016	NYAYO (KOROGOCHO)	312	7	-1.25093	36.88799667	yes	INT007733	223	223	NA	0	0	17	0	1	0	0	0	20	0	0	3	0	0	0	0	0	ruminants birds	NA	ERS3415388 (SAMEA5611199)
TMP019501	Plate 04	P160305	UZ026268	KIG020BOV1	bovine	ruminant	livestock	KIG020	03/11/2015	KIRIGU	260	6	-1.29399	36.704215	yes	TMP019501	223	223	NA	0	3	2	0	0	0	0	0	3	0	0	0	0	0	0	0	0	ruminants birds	NA	ERS3415882 (SAMEA5611693)
TMP019529	Plate 04	P160305	UZ026204	KIG020CAP1	goat	ruminant	livestock	KIG020	03/11/2015	KIRIGU	260	6	-1.29399	36.704215	yes	TMP019529	223	223	NA	0	3	2	0	0	0	0	0	3	0	0	0	0	0	0	0	0	ruminants birds	NA	ERS3415887 (SAMEA5611698)
TMP023415	Plate 17	P160773	UZ030177	EMB085COL9	pigeons	poultry	livestock	EMB085	22/08/2016	EMBAKASI	211	4	-1.311076667	36.89346167	yes	TMP023415	223	223	NA	0	0	0	0	0	0	0	0	300	0	0	0	0	0	0	26	0	birds	NA	ERS3416133 (SAMEA5611945)
TMP023867	Plate 17	P160773	UZ035227	MGM095ROD1	rodent	w_mammal	wildlife	MGM095	20/09/2016	MUGUMOINI	212	4	-1.32085454	36.7856738	no	TMP023867	223	223	NA	0	0	0	0	0	0	0	0	0	0	0	0	0	0	0	0	0	none	NA	ERS3416153 (SAMEA5611965)
TWAG00386	Plate 09	P160554	UZ029517	MIH069HUM1	human	human	human	MIH069	13/06/2016	MIHANGO	270	5	-1.273078333	36.95491	no	TWAG00386	223	223	NA	0	0	0	0	0	0	0	0	0	0	0	0	0	0	0	0	0	none	NA	ERS3416252 (SAMEA5612064)
TWAG00193	Plate 16	P160810	UZ029605	MIH067NUM1	guinea_fowl	poultry	livestock	MIH067	07/06/2016	MIHANGO	270	5	-1.273335	36.944275	yes	TWAG00193	219	219	NA	0	3	0	0	0	0	0	0	30	0	0	0	0	11	0	0	0	ruminants birds	NA	ERS3416228 (SAMEA5612040)
ALQ019942	Plate 03	P160305	UZ026596	KYL026SUI5	pig	monogastric	livestock	KYL026	24/11/2015	KAYOLE	313	6	-1.276371667	36.920625	yes	ALQ019942	218	218	NA	0	0	0	0	0	14	0	0	40	0	0	0	0	0	0	0	0	monogastrics birds	NA	ERS3414798 (SAMEA5610608)
INT005414	Plate 05	P160465	UZ028009	STC047HUM1	human	human	human	STC047	22/03/2016	SOUTH C	211	3	-1.325503333	36.82077667	yes	INT005414	218	218	NA	0	0	0	0	0	0	0	0	6	0	0	0	0	0	0	0	0	birds	NA	ERS3415225 (SAMEA5611035)
TMP016623	Plate 01	P160078	UZ025206	VIW002CAP5	goat	ruminant	livestock	VIW002	01/09/2015	VIWANDANI	312	7	-1.309915	36.878755	yes	TMP016623	218	218	NA	0	3	0	0	0	15	3	0	5	0	0	0	0	0	0	0	0	ruminants monogastrics birds	NA	ERS3415754 (SAMEA5611565)
TMP016826	Plate 13	P160720	UZ025804	HAR010GAL4	chickens	poultry	livestock	HAR010	06/10/2015	HARAMBEE	211	3	-1.293191667	36.88320833	yes	TMP016826	218	218	NA	0	0	0	0	0	0	0	0	5	0	0	0	0	0	0	0	0	birds	NA	ERS3415764 (SAMEA5611575)
TMP019832	Plate 11	P160719	UZ026000	MLK023ROD2	rodent	w_mammal	wildlife	MLK023	10/11/2015	MLANGO KUBWA	312	7	-1.264538333	36.85216167	yes	TMP019832	218	218	NA	0	26	2	0	4	0	0	0	0	0	0	0	0	0	0	0	0	ruminants	NA	ERS3415921 (SAMEA5611732)
TMP020076	Plate 01	P160078	UZ2004486	MAK016AVN2	avian	w_avian	wildlife	MAK016	26/10/2015	MAKONGENI	230	6	-1.29896	36.84870833	yes	TMP020076	218	218	NA	0	0	0	0	0	0	0	0	11	0	0	0	0	0	0	0	0	birds	NA	ERS3415955 (SAMEA5611766)
TMP021971	Plate 04	P160305	UZ2004899	STC048AVN1	avian	w_avian	wildlife	STC048	30/03/2016	SOUTH C	211	3	-1.324195	36.82088333	no	TMP021971	218	218	NA	0	0	0	0	0	0	0	0	0	0	0	0	0	0	0	0	0	none	NA	ERS3416105 (SAMEA5611916)
TMP023873	Plate 17	P160773	UZ030351	BOM091PRM1	primate	w_mammal	wildlife	BOM091	13/09/2016	BOMAS	211	3	-1.320306667	36.78094667	yes	TMP023873	218	218	NA	0	0	0	0	0	0	2	0	15	0	0	0	2	3	2	0	3	monogastrics birds	NA	ERS3416154 (SAMEA5611966)
ALQ019542	Plate 12	P160719	UZ026548	KIG021HUM1	human	human	human	KIG021	03/11/2015	KIRIGU	260	6	-1.288618333	36.69824333	no	ALQ019542	216	216	NA	0	0	0	0	0	0	0	0	0	0	0	0	0	0	0	0	0	none	NA	ERS3414748 (SAMEA5610558)
ALQ019592	Plate 04	P160305	UZ026625	KYL025HUM6	human	human	human	KYL025	16/11/2015	KAYOLE	313	6	-1.265657435	36.91767563	yes	ALQ019592	216	216	NA	0	1	14	0	0	0	0	0	0	0	0	2	0	0	0	0	0	ruminants birds	NA	ERS3414753 (SAMEA5610563)
INT003413	Plate 14	P160720	UZ026994	KRR038HUM2	human	human	human	KRR038	15/02/2016	KARURA	120	2	-1.216581667	36.79006167	no	INT003413	216	216	NA	0	0	0	0	0	0	0	0	0	0	0	0	0	0	0	0	0	none	NA	ERS3415026 (SAMEA5610836)
INT005389	Plate 06	P160465	UZ028019	STC047GAL3	chickens	poultry	livestock	STC047	22/03/2016	SOUTH C	211	3	-1.325503333	36.82077667	yes	INT005389	216	216	NA	0	0	0	0	0	0	0	0	6	0	0	0	0	0	0	0	0	birds	NA	ERS3415222 (SAMEA5611032)
INT005657	Plate 05	P160465	UZ2004915	KHW051AVN2	avian	w_avian	wildlife	KHW051	04/04/2016	KAHAWA WEST / JUJA K	311	6	-1.180833333	36.91151833	no	INT005657	216	216	NA	0	0	0	0	0	0	0	0	0	0	0	0	0	0	0	0	0	none	NA	ERS3415259 (SAMEA5611069)
INT007887	Plate 16	P160810	UZ029156	KAS061SUI1	pig	monogastric	livestock	KAS061	16/05/2016	KASARANI	321	5	-1.223748333	36.92381333	yes	INT007887	216	216	NA	0	0	3	0	0	10	0	0	9	0	0	0	0	0	0	0	0	ruminants monogastrics birds	NA	ERS3415409 (SAMEA5611220)
INT008624	Plate 13	P160720	UZ030430	EMB086HUM3	human	human	human	EMB086	23/08/2016	EMBAKASI	211	4	-1.310175	36.89392833	no	INT008624	216	216	NA	0	0	0	0	0	0	0	0	0	0	0	0	0	0	0	0	0	none	NA	ERS3415437 (SAMEA5611248)
INT008641	Plate 13	P160720	UZ030435	EMB086HUM5	human	human	human	EMB086	23/08/2016	EMBAKASI	211	4	-1.310175	36.89392833	no	INT008641	216	216	NA	0	0	0	0	0	0	0	0	0	0	0	0	0	0	0	0	0	none	NA	ERS3415439 (SAMEA5611250)
TMP016129	Plate 03	P160305	UZ025346	VIW002AVN3	avian	w_avian	wildlife	VIW002	01/09/2015	VIWANDANI	312	7	-1.309915	36.878755	yes	TMP016129	216	216	NA	0	3	0	0	0	15	3	0	5	0	0	0	0	0	0	0	0	ruminants monogastrics birds	NA	ERS3415699 (SAMEA5611510)
TMP017029	Plate 11	P160719	UZ025393	HAR012AV_POP4	av_pop	w_avian	wildlife	HAR012	07/10/2015	HARAMBEE	211	3	-1.282213333	36.88126167	no	TMP017029	216	216	NA	0	0	0	0	0	0	0	0	0	0	0	0	0	0	0	0	0	none	NA	ERS3415780 (SAMEA5611591)
TMP024113	Plate 19	P160812	UZ030974	LOR098HUM3	human	human	human	LOR098	28/09/2016	LORESHO	120	1	-1.24741938	36.7508106	yes	TMP024113	216	216	NA	0	0	3	0	1	0	0	0	21	14	0	2	0	0	0	0	0	ruminants birds	NA	ERS3416190 (SAMEA5612002)
TMP024119	Plate 19	P160812	UZ030825	LOR098HUM4	human	human	human	LOR098	28/09/2016	LORESHO	120	1	-1.24741938	36.7508106	yes	TMP024119	216	216	NA	0	0	3	0	1	0	0	0	21	14	0	2	0	0	0	0	0	ruminants birds	NA	ERS3416191 (SAMEA5612003)
ALQ028174	Plate 21	P170066	UZ028107	MWK055AV_POP5	av_pop	w_avian	wildlife	MWK055	26/04/2016	MWIKI	313	6	-1.23016808	36.93353817	no	ALQ028174	216*	216	NA	0	0	0	0	0	0	0	0	0	0	0	0	0	0	0	0	0	none	NA	ERS3414900 (SAMEA5610710)
INT007384	Plate 08	P160553	UZ028606	MWK056CAP1	goat	ruminant	livestock	MWK056	03/05/2016	MWIKI	313	6	-1.231583333	36.93017333	yes	INT007384	215	215	NA	0	0	4	0	0	10	0	0	0	0	0	7	0	0	0	0	0	ruminants monogastrics birds	NA	ERS3415339 (SAMEA5611149)
TMP016215	Plate 01	P160078	UZ025409	MSA004GAL6	chickens	poultry	livestock	MSA004	14/09/2015	MOWLEM = SAIKA	311	6	-1.245281667	36.92033333	yes	TMP016215	211	211	Yes	0	5	0	0	0	7	4	0	20	0	0	0	0	0	0	0	0	ruminants monogastrics birds other	NA	ERS3415711 (SAMEA5611522)
TMP019986	Plate 02	P160078	UZ026041	MAK017AVN2	avian	w_avian	wildlife	MAK017	27/10/2015	MAKONGENI	230	6	-1.298248333	36.84727333	yes	TMP019986	211	211	Yes	0	0	0	0	0	0	5	1	30	0	0	0	0	0	0	0	0	monogastrics birds	NA	ERS3415942 (SAMEA5611753)
ALQ023245	Plate 07	P160553	UZ029231	SPV064HUM3	human	human	human	SPV064	23/05/2016	SPRING VALLEY	110	2	-1.253818333	36.790205	yes	ALQ023245	210	210	NA	0	1	0	3	5	0	6	0	4	0	0	0	3	0	1	0	0	ruminants monogastrics birds	NA	ERS3414872 (SAMEA5610682)
INT004989	Plate 05	P160465	UZ2004859	KIL042AVN1	avian	w_avian	wildlife	KIL042	09/03/2016	KILIMANI	130	2	-1.297515	36.78249167	yes	INT004989	210	210	NA	0	0	6	0	0	0	0	0	6	0	0	0	0	0	0	0	0	ruminants birds	NA	ERS3415170 (SAMEA5610980)
PLQ2481	Plate 17	P160773	UZ030232	KTS089HUM8	human	human	human	KTS089	06/09/2016	KITISURU	110	1	-1.237836407	36.75603901	yes	PLQ2481	210	210	NA	0	0	0	0	0	0	0	0	0	7	0	0	0	0	0	0	0	birds	NA	ERS3415629 (SAMEA5611440)
TMP016360	Plate 03	P160305	UZ025783	HAR010HUM2	human	human	human	HAR010	06/10/2015	HARAMBEE	211	3	-1.293191667	36.88320833	yes	TMP016360	210	210	NA	0	0	0	0	0	0	0	0	5	0	0	0	0	0	0	0	0	birds	NA	ERS3415726 (SAMEA5611537)
ALQ019771	Plate 03	P160305	UZ026649	KYL025CAP3	goat	ruminant	livestock	KYL025	16/11/2015	KAYOLE	313	6	-1.265657435	36.91767563	yes	ALQ019771	207	207	NA	0	1	14	0	0	0	0	0	0	0	0	2	0	0	0	0	0	ruminants birds	NA	ERS3414774 (SAMEA5610584)
ALQ019581	Plate 03	P160305	UZ026621	KYL025HUM5	human	human	human	KYL025	16/11/2015	KAYOLE	313	6	-1.265657435	36.91767563	yes	ALQ019581	206	206	NA	0	1	14	0	0	0	0	0	0	0	0	2	0	0	0	0	0	ruminants birds	NA	ERS3414751 (SAMEA5610561)
INT003738	Plate 10	P160554	UZ027267	KRR039GAL9	chickens	poultry	livestock	KRR039	22/02/2016	KARURA	120	2	-1.224276667	36.82658833	yes	INT003738	206	206	NA	0	0	0	0	0	0	0	0	0	0	700	0	0	0	0	0	0	birds	NA	ERS3415038 (SAMEA5610848)
INT004805	Plate 06	P160465	UZ027277	KRR039GAL2	chickens	poultry	livestock	KRR039	22/02/2016	KARURA	120	2	-1.224276667	36.82658833	yes	INT004805	206	206	NA	0	0	0	0	0	0	0	0	0	0	700	0	0	0	0	0	0	birds	NA	ERS3415147 (SAMEA5610957)
INT005052	Plate 05	P160465	UZ027577	KIL042GAL3	chickens	poultry	livestock	KIL042	09/03/2016	KILIMANI	130	2	-1.297515	36.78249167	yes	INT005052	206	206	NA	0	0	6	0	0	0	0	0	6	0	0	0	0	0	0	0	0	ruminants birds	NA	ERS3415180 (SAMEA5610990)
INT005595	Plate 06	P160465	UZ028144	KHW049GAL4	chickens	poultry	livestock	KHW049	05/04/2016	KAHAWA WEST / JUJA K	311	6	-1.179655	36.90618833	yes	INT005595	206	206	NA	0	5	0	0	0	0	0	0	18	0	0	0	0	0	0	0	0	ruminants birds	NA	ERS3415251 (SAMEA5611061)
INT005893	Plate 10	P160554	UZ027415	LUM052AVN3	avian	w_avian	wildlife	LUM052	11/04/2016	LUMUMBA (JERICHO)	220	6	-1.291	36.868835	no	INT005893	206	206	NA	0	0	0	0	0	0	0	0	0	0	0	0	0	0	0	0	0	none	NA	ERS3415289 (SAMEA5611099)
PLQ000478	Plate 13	P160720	UZ022267	GWK078GAL4	chickens	poultry	livestock	GWK078	25/07/2016	GATWIKIRA	312	7	-1.314113333	36.78104167	yes	PLQ000478	206	206	NA	0	0	0	0	0	0	0	0	16	0	0	0	0	0	0	0	0	birds	NA	ERS3415523 (SAMEA5611334)
TMP016312	Plate 01	P160078	UZ025356	KAN008AVN2	avian	w_avian	wildlife	KAN008	22/09/2015	KAREN	110	1	-1.338961667	36.70231333	yes	TMP016312	206	206	NA	0	0	0	0	0	0	0	0	140	0	0	0	0	0	0	0	0	birds	NA	ERS3415719 (SAMEA5611530)
TMP019325	Plate 02	P160078	UZ026199	KIG019SUI2	pig	monogastric	livestock	KIG019	02/11/2015	KIRIGU	260	6	-1.291726667	36.70118333	yes	TMP019325	206	206	NA	0	0	16	0	0	2	0	0	5	0	0	0	0	0	0	0	0	ruminants monogastrics birds	NA	ERS3415859 (SAMEA5611670)
TMP019512	Plate 03	P160305	UZ026272	KIG020GAL1	chickens	poultry	livestock	KIG020	03/11/2015	KIRIGU	260	6	-1.29399	36.704215	yes	TMP019512	206	206	NA	0	3	2	0	0	0	0	0	3	0	0	0	0	0	0	0	0	ruminants birds	NA	ERS3415884 (SAMEA5611695)
TMP021228	Plate 13	P160720	UZ022080	GWK076GAL4	chickens	poultry	livestock	GWK076	19/07/2016	GATWIKIRA	312	7	-1.31708	36.77864167	yes	TMP021228	206	206	NA	0	0	0	0	0	20	0	0	0	0	16	0	0	0	0	0	0	monogastrics birds	NA	ERS3416062 (SAMEA5611873)
TMP021285	Plate 19	P160812	UZ030006	GWK076SUI4	pig	monogastric	livestock	GWK076	19/07/2016	GATWIKIRA	312	7	-1.31708	36.77864167	yes	TMP021285	206	206	NA	0	0	0	0	0	20	0	0	0	0	16	0	0	0	0	0	0	monogastrics birds	NA	ERS3416072 (SAMEA5611883)
TMP021678	Plate 19	P160812	UZ028137	KHW049GAL1	chickens	poultry	livestock	KHW049	05/04/2016	KAHAWA WEST / JUJA K	311	6	-1.179655	36.90618833	yes	TMP021678	206	206	NA	0	5	0	0	0	0	0	0	18	0	0	0	0	0	0	0	0	ruminants birds	NA	ERS3416091 (SAMEA5611902)
TMP021689	Plate 15	P160810	UZ027985	KHW049HUM3	human	human	human	KHW049	05/04/2016	KAHAWA WEST / JUJA K	311	6	-1.179655	36.90618833	yes	TMP021689	206	206	NA	0	5	0	0	0	0	0	0	18	0	0	0	0	0	0	0	0	ruminants birds	NA	ERS3416092 (SAMEA5611903)
TMP021732	Plate 16	P160810	UZ028222	KHW050MEL3	turkeys	poultry	livestock	KHW050	06/04/2016	KAHAWA WEST / JUJA K	311	6	-1.179393235	36.90742073	yes	TMP021732	206	206	NA	0	0	4	11	0	0	0	0	20	0	0	0	14	4	5	0	0	ruminants birds	NA	ERS3416096 (SAMEA5611907)
TMP022397	Plate 13	P160720	UZ022329	GTN074OVN3	sheep	ruminant	livestock	GTN074	13/07/2016	GATINA	260	6	-1.291341667	36.75221	yes	TMP022397	206	206	NA	0	0	0	0	3	0	0	0	7	0	0	0	0	0	0	0	0	ruminants birds	NA	ERS3416115 (SAMEA5611927)
TMP023944	Plate 19	P160812	UZ031038	LOR097GAL3	chickens	poultry	livestock	LOR097	27/09/2016	LORESHO	110	1	-1.247168333	36.764595	yes	TMP023944	205	205	NA	0	0	0	0	0	0	0	0	13	0	0	0	0	16	0	0	0	birds	NA	ERS3416164 (SAMEA5611976)
ALQ023239	Plate 07	P160553	UZ029153	SPV064OVN1	sheep	ruminant	livestock	SPV064	23/05/2016	SPRING VALLEY	110	2	-1.253818333	36.790205	yes	ALQ023239	201	201	NA	0	1	0	3	5	0	6	0	4	0	0	0	3	0	1	0	0	ruminants monogastrics birds	NA	ERS3414871 (SAMEA5610681)
INT004340	Plate 05	P160465	UZ2004724	DAN031AVN2	avian	w_avian	wildlife	DAN031	11/01/2016	DANDORA 'B'	313	6	-1.241636667	36.90821167	yes	INT004340	201	201	NA	0	9	0	0	0	0	0	0	13	0	0	0	0	0	0	0	0	ruminants birds	NA	ERS3415080 (SAMEA5610890)
TMP015544	Plate 02	P160078	UZ025331	VIW002SUI3	pig	monogastric	livestock	VIW002	01/09/2015	VIWANDANI	312	7	-1.309915	36.878755	yes	TMP015544	201	201	NA	0	3	0	0	0	15	3	0	5	0	0	0	0	0	0	0	0	ruminants monogastrics birds	NA	ERS3415674 (SAMEA5611485)
TMP019322	Plate 01	P160078	UZ026139	KIG019CAP5	goat	ruminant	livestock	KIG019	02/11/2015	KIRIGU	260	6	-1.291726667	36.70118333	yes	TMP019322	201	201	NA	0	0	16	0	0	2	0	0	5	0	0	0	0	0	0	0	0	ruminants monogastrics birds	NA	ERS3415858 (SAMEA5611669)
TMP015788	Plate 01	P160078	UZ025089	VIW001HUM2	human	human	human	VIW001	31/08/2015	VIWANDANI	312	7	-1.313058333	36.85866167	yes	TMP015788	200	200	NA	0	0	0	4	0	0	0	0	200	0	0	0	0	5	0	0	0	ruminants birds	NA	ERS3415680 (SAMEA5611491)
TMP019173	Plate 04	P160305	UZ026134	KIG019HUM2	human	human	human	KIG019	02/11/2015	KIRIGU	260	6	-1.291726667	36.70118333	yes	TMP019173	200	200	NA	0	0	16	0	0	2	0	0	5	0	0	0	0	0	0	0	0	ruminants monogastrics birds	NA	ERS3415840 (SAMEA5611651)
TMP024008	Plate 19	P160812	UZ031032	LOR097HUM9	human	human	human	LOR097	27/09/2016	LORESHO	110	1	-1.247168333	36.764595	yes	TMP024008	200	200	NA	0	0	0	0	0	0	0	0	13	0	0	0	0	16	0	0	0	birds	NA	ERS3416174 (SAMEA5611986)
INT005007	Plate 05	P160465	UZ027548	KIL041HUM1	human	human	human	KIL041	08/03/2016	KILIMANI	110	2	-1.291786185	36.78376162	yes	INT005007	197	197	NA	0	0	0	3	3	0	33	0	167	0	0	6	3	4	6	0	0	ruminants monogastrics birds	NA	ERS3415173 (SAMEA5610983)
ALQ034855	Plate 11	P160719	UZ030461	EMB087GAL2	chickens	poultry	livestock	EMB087	24/08/2016	EMBAKASI	211	4	-1.310101667	36.89491333	yes	ALQ034855	196	196	NA	0	0	0	0	0	0	6	0	20	0	0	0	0	0	0	0	0	monogastrics birds	NA	ERS3414968 (SAMEA5610778)
INT003633	Plate 12	P160719	UZ027101	UMJ036GAL5	chickens	poultry	livestock	UMJ036	27/01/2016	UMOJA	212	4	-1.278311667	36.88803	yes	INT003633	196	196	NA	0	0	5	0	0	0	28	0	24	0	0	0	0	0	3	0	0	ruminants monogastrics birds	NA	ERS3415034 (SAMEA5610844)
INT004392	Plate 15	P160810	UZ2004749	DANDUMPAV_POP2	av_pop	w_avian	wildlife	DANDUMP	NA	NA	NA	NA	NA	NA	NA	INT004392	196	196	NA	NA	NA	NA	NA	NA	NA	NA	NA	NA	NA	NA	NA	NA	NA	NA	NA	NA	NA	NA	ERS3415088 (SAMEA5610898)
PL015190	Plate 01	P160078	UZ025935	MBO014HUM4	human	human	human	MBO014	12/10/2015	MBOTELA	240	5	-1.298803333	36.86333833	yes	PL015190	196	196	NA	0	0	0	0	0	0	3	3	12	0	0	8	0	3	0	0	0	monogastrics birds	NA	ERS3415502 (SAMEA5611313)
TMP016917	Plate 21	P170066	UZ025819	HAR012HUM2	human	human	human	HAR012	07/10/2015	HARAMBEE	211	3	-1.282213333	36.88126167	no	TMP016917	196	196	NA	0	0	0	0	0	0	0	0	0	0	0	0	0	0	0	0	0	none	NA	ERS3415775 (SAMEA5611586)
TMP020059	Plate 01	P160078	UZ026029	MAK016GAL4	chickens	poultry	livestock	MAK016	26/10/2015	MAKONGENI	230	6	-1.29896	36.84870833	yes	TMP020059	195	195	NA	0	0	0	0	0	0	0	0	11	0	0	0	0	0	0	0	0	birds	NA	ERS3415952 (SAMEA5611763)
ALQ019645	Plate 04	P160305	UZ026668	KYL025ANA2	ducks	poultry	livestock	KYL025	16/11/2015	KAYOLE	313	6	-1.265657435	36.91767563	yes	ALQ019645	193	193	NA	0	1	14	0	0	0	0	0	0	0	0	2	0	0	0	0	0	ruminants birds	NA	ERS3414761 (SAMEA5610571)
INT007113	Plate 06	P160465	UZ028341	LUM054CAP7	goat	ruminant	livestock	LUM054	13/04/2016	LUMUMBA (JERICHO)	220	6	-1.293103333	36.871635	yes	INT007113	193	193	NA	0	0	44	0	0	0	0	0	5	0	0	12	0	0	0	0	0	ruminants birds	NA	ERS3415328 (SAMEA5611138)
TMP020694	Plate 14	P160720	UZ029969	KWG070HUM2	human	human	human	KWG070	04/07/2016	KAWANGWARE	260	6	-1.278915	36.74525167	yes	TMP020694	192	192	NA	0	1	22	0	25	0	0	0	0	0	0	0	0	0	0	0	0	ruminants	NA	ERS3415982 (SAMEA5611793)
TMP023393	Plate 18	P160773	UZ030184	EMB085GAL5	chickens	poultry	livestock	EMB085	22/08/2016	EMBAKASI	211	4	-1.311076667	36.89346167	yes	TMP023393	192	192	NA	0	0	0	0	0	0	0	0	300	0	0	0	0	0	0	26	0	birds	NA	ERS3416130 (SAMEA5611942)
TMP020837	Plate 15	P160810	UZ029436	GTN075AVN1	avian	w_avian	wildlife	GTN075	13/07/2016	GATINA	260	6	-1.275552495	36.75860432	no	TMP020837	191	191	NA	0	0	0	0	0	0	0	0	0	0	0	0	0	0	0	0	0	none	NA	ERS3416004 (SAMEA5611815)
PLQ2243	Plate 15	P160810	UZ030573	KTS088BOV3	bovine	ruminant	livestock	KTS088	05/09/2016	KITISURU	110	1	-1.232017083	36.75897979	yes	PLQ2243	189	189	NA	0	4	0	0	0	0	0	0	7	5	0	6	7	0	0	0	0	ruminants birds	NA	ERS3415601 (SAMEA5611412)
TMP023349	Plate 18	P160773	UZ030183	EMB085COL7	pigeons	poultry	livestock	EMB085	22/08/2016	EMBAKASI	211	4	-1.311076667	36.89346167	yes	TMP023349	189	189	NA	0	0	0	0	0	0	0	0	300	0	0	0	0	0	0	26	0	birds	NA	ERS3416128 (SAMEA5611940)
TMP023446	Plate 18	P160773	UZ030202	EMB085GAL4	chickens	poultry	livestock	EMB085	22/08/2016	EMBAKASI	211	4	-1.311076667	36.89346167	yes	TMP023446	189	189	NA	0	0	0	0	0	0	0	0	300	0	0	0	0	0	0	26	0	birds	NA	ERS3416134 (SAMEA5611946)
TMP023506	Plate 18	P160773	UZ030197	EMB085GAL1	chickens	poultry	livestock	EMB085	22/08/2016	EMBAKASI	211	4	-1.311076667	36.89346167	yes	TMP023506	189	189	NA	0	0	0	0	0	0	0	0	300	0	0	0	0	0	0	26	0	birds	NA	ERS3416137 (SAMEA5611949)
ALQ017075	Plate 03	P160305	UZ025462	KAN009AVN8	avian	w_avian	wildlife	KAN009	22/09/2015	KAREN	110	1	-1.313598333	36.68382833	no	ALQ017075	187	187	NA	0	0	0	0	0	0	0	0	0	0	0	0	0	0	0	0	0	none	NA	ERS3414666 (SAMEA5610476)
ALQ018943	Plate 04	P160305	UZ026043	MAK017AVN8	avian	w_avian	wildlife	MAK017	27/10/2015	MAKONGENI	230	6	-1.298248333	36.84727333	yes	ALQ018943	187	187	NA	0	0	0	0	0	0	5	1	30	0	0	0	0	0	0	0	0	monogastrics birds	NA	ERS3414717 (SAMEA5610527)
INT000450	Plate 04	P160305	UZ025386	KAN008AVN6	avian	w_avian	wildlife	KAN008	22/09/2015	KAREN	110	1	-1.338961667	36.70231333	yes	INT000450	187	187	NA	0	0	0	0	0	0	0	0	140	0	0	0	0	0	0	0	0	birds	NA	ERS3415001 (SAMEA5610811)
TMP016042	Plate 02	P160078	UZ025425	KAN007PRM1	primate	w_mammal	wildlife	KAN007	21/09/2015	KAREN	110	1	-1.360794419	36.71998186	yes	TMP016042	187	187	NA	0	6	0	0	0	0	0	0	0	0	0	0	2	0	0	0	0	ruminants birds other	NA	ERS3415693 (SAMEA5611504)
TMP016473	Plate 01	P160078	UZ025433	KAN007PRM2	primate	w_mammal	wildlife	KAN007	21/09/2015	KAREN	110	1	-1.360794419	36.71998186	yes	TMP016473	187	187	NA	0	6	0	0	0	0	0	0	0	0	0	0	2	0	0	0	0	ruminants birds other	NA	ERS3415740 (SAMEA5611551)
TMP016878	Plate 02	P160078	UZ025596	KAN007BOV1	bovine	ruminant	livestock	KAN007	21/09/2015	KAREN	110	1	-1.360794419	36.71998186	yes	TMP016878	187	187	NA	0	6	0	0	0	0	0	0	0	0	0	0	2	0	0	0	0	ruminants birds other	NA	ERS3415771 (SAMEA5611582)
TMP016889	Plate 01	P160078	UZ025601	KAN007BOV2	bovine	ruminant	livestock	KAN007	21/09/2015	KAREN	110	1	-1.360794419	36.71998186	yes	TMP016889	187	187	NA	0	6	0	0	0	0	0	0	0	0	0	0	2	0	0	0	0	ruminants birds other	NA	ERS3415773 (SAMEA5611584)
ALQ017456	Plate 03	P160305	UZ025861	MAK016GAL5	chickens	poultry	livestock	MAK016	26/10/2015	MAKONGENI	230	6	-1.29896	36.84870833	yes	ALQ017456	182	182	NA	0	0	0	0	0	0	0	0	11	0	0	0	0	0	0	0	0	birds	NA	ERS3414694 (SAMEA5610504)
INT005556	Plate 05	P160465	UZ027987	KHW049HUM4	human	human	human	KHW049	05/04/2016	KAHAWA WEST / JUJA K	311	6	-1.179655	36.90618833	yes	INT005556	181	181	NA	0	5	0	0	0	0	0	0	18	0	0	0	0	0	0	0	0	ruminants birds	NA	ERS3415244 (SAMEA5611054)
INT005650	Plate 10	P160554	UZ027398	KHW051ROD2	rodent	w_mammal	wildlife	KHW051	04/04/2016	KAHAWA WEST / JUJA K	311	6	-1.180833333	36.91151833	no	INT005650	181	181	NA	0	0	0	0	0	0	0	0	0	0	0	0	0	0	0	0	0	none	NA	ERS3415258 (SAMEA5611068)
TMP021113	Plate 21	P170066	UZ035002	GTN075ROD3	rodent	w_mammal	wildlife	GTN075	13/07/2016	GATINA	260	6	-1.275552495	36.75860432	no	TMP021113	181	181	NA	0	0	0	0	0	0	0	0	0	0	0	0	0	0	0	0	0	none	NA	ERS3416047 (SAMEA5611858)
INT003467	Plate 04	P160305	UZ2004879	KIL041AVN7	avian	w_avian	wildlife	KIL041	08/03/2016	KILIMANI	110	2	-1.291786185	36.78376162	yes	INT003467	180	180	NA	0	0	0	3	3	0	33	0	167	0	0	6	3	4	6	0	0	ruminants monogastrics birds	NA	ERS3415029 (SAMEA5610839)
INT005794	Plate 06	P160465	UZ028237	KHW050CAP4	goat	ruminant	livestock	KHW050	06/04/2016	KAHAWA WEST / JUJA K	311	6	-1.179393235	36.90742073	yes	INT005794	176	176	NA	0	0	4	11	0	0	0	0	20	0	0	0	14	4	5	0	0	ruminants birds	NA	ERS3415277 (SAMEA5611087)
TMP016818	Plate 01	P160078	UZ025513	HAR012ROD1	rodent	w_mammal	wildlife	HAR012	07/10/2015	HARAMBEE	211	3	-1.282213333	36.88126167	no	TMP016818	174	174	NA	0	0	0	0	0	0	0	0	0	0	0	0	0	0	0	0	0	none	NA	ERS3415763 (SAMEA5611574)
TMP020046	Plate 01	P160078	UZ2004488	MAK016AVN1	avian	w_avian	wildlife	MAK016	26/10/2015	MAKONGENI	230	6	-1.29896	36.84870833	yes	TMP020046	174	174	NA	0	0	0	0	0	0	0	0	11	0	0	0	0	0	0	0	0	birds	NA	ERS3415951 (SAMEA5611762)
TMP020878	Plate 14	P160720	UZ021982	GTN073HUM2	human	human	human	GTN073	12/07/2016	GATINA	260	6	-1.27637736	36.75747462	yes	TMP020878	174	174	NA	0	4	0	0	0	0	0	0	6	0	0	0	0	0	0	0	0	ruminants birds	NA	ERS3416009 (SAMEA5611820)
TMP024037	Plate 19	P160812	UZ030953	LOR097HUM7	human	human	human	LOR097	27/09/2016	LORESHO	110	1	-1.247168333	36.764595	yes	TMP024037	174	174	NA	0	0	0	0	0	0	0	0	13	0	0	0	0	16	0	0	0	birds	NA	ERS3416179 (SAMEA5611991)
ALQ019660	Plate 04	P160305	UZ026642	KYL025HUM1	human	human	human	KYL025	16/11/2015	KAYOLE	313	6	-1.265657435	36.91767563	yes	ALQ019660	165	165	NA	0	1	14	0	0	0	0	0	0	0	0	2	0	0	0	0	0	ruminants birds	NA	ERS3414763 (SAMEA5610573)
ALQ020444	Plate 04	P160305	UZ026690	UTH030AVN2	avian	w_avian	wildlife	UTH030	01/12/2015	UTHIRU	260	6	-1.26573424	36.70066436	no	ALQ020444	165	165	NA	0	0	0	0	0	0	0	0	0	0	0	0	0	0	0	0	0	none	NA	ERS3414847 (SAMEA5610657)
TMP018521	Plate 03	P160305	UZ026669	KYL025ANA1	ducks	poultry	livestock	KYL025	16/11/2015	KAYOLE	313	6	-1.265657435	36.91767563	yes	TMP018521	165	165	NA	0	1	14	0	0	0	0	0	0	0	0	2	0	0	0	0	0	ruminants birds	NA	ERS3415806 (SAMEA5611617)
TMP021231	Plate 13	P160720	UZ030008	GWK076GAL1	chickens	poultry	livestock	GWK076	19/07/2016	GATWIKIRA	312	7	-1.31708	36.77864167	yes	TMP021231	165	165	NA	0	0	0	0	0	20	0	0	0	0	16	0	0	0	0	0	0	monogastrics birds	NA	ERS3416063 (SAMEA5611874)
INT007776	Plate 08	P160553	UZ028842	KOR059SUI1	pig	monogastric	livestock	KOR059	10/05/2016	NYAYO (KOROGOCHO)	312	7	-1.253945	36.88923667	yes	INT007776	164	164	NA	0	0	0	0	0	10	0	0	0	0	0	0	0	0	0	0	0	monogastrics	NA	ERS3415394 (SAMEA5611205)
PLQ000733	Plate 21	P170066	UZ035080	NGNBATBT_POP2	bat_pop	w_bat	wildlife	NGNBAT	NA	NA	NA	NA	NA	NA	NA	PLQ000733	164	164	NA	NA	NA	NA	NA	NA	NA	NA	NA	NA	NA	NA	NA	NA	NA	NA	NA	NA	NA	NA	ERS3415563 (SAMEA5611374)
TMP016388	Plate 03	P160305	UZ025788	HAR010HUM1	human	human	human	HAR010	06/10/2015	HARAMBEE	211	3	-1.293191667	36.88320833	yes	TMP016388	164	164	NA	0	0	0	0	0	0	0	0	5	0	0	0	0	0	0	0	0	birds	NA	ERS3415730 (SAMEA5611541)
TMP016669	Plate 02	P160078	UZ025339	VIW003AVN1	avian	w_avian	wildlife	VIW003	08/09/2015	VIWANDANI	312	7	-1.300886667	36.88674	no	TMP016669	164	164	NA	0	0	0	0	0	0	0	0	0	0	0	0	0	0	0	0	0	none	NA	ERS3415757 (SAMEA5611568)
TMP020451	Plate 07	P160553	UZ029540	MIH067BOV2	bovine	ruminant	livestock	MIH067	07/06/2016	MIHANGO	270	5	-1.273335	36.944275	yes	TMP020451	164	164	NA	0	3	0	0	0	0	0	0	30	0	0	0	0	11	0	0	0	ruminants birds	NA	ERS3415967 (SAMEA5611778)
INT000379	Plate 04	P160305	UZ025423	MSA005AVN2	avian	w_avian	wildlife	MSA005	16/09/2015	MOWLEM = SAIKA	311	6	-1.253531667	36.92563333	no	INT000379	162	162	NA	0	0	0	0	0	0	0	0	0	0	0	0	0	0	0	0	0	none	NA	ERS3414995 (SAMEA5610805)
INT000384	Plate 03	P160305	UZ025419	MSA005AVN4	avian	w_avian	wildlife	MSA005	16/09/2015	MOWLEM = SAIKA	311	6	-1.253531667	36.92563333	no	INT000384	162	162	NA	0	0	0	0	0	0	0	0	0	0	0	0	0	0	0	0	0	none	NA	ERS3414996 (SAMEA5610806)
INT004210	Plate 04	P160305	UZ026952	DAN031BOV1	bovine	ruminant	livestock	DAN031	11/01/2016	DANDORA 'B'	313	6	-1.241636667	36.90821167	yes	INT004210	162	162	NA	0	9	0	0	0	0	0	0	13	0	0	0	0	0	0	0	0	ruminants birds	NA	ERS3415061 (SAMEA5610871)
INT005816	Plate 09	P160554	UZ027448	KHW050AVN11	avian	w_avian	wildlife	KHW050	06/04/2016	KAHAWA WEST / JUJA K	311	6	-1.179393235	36.90742073	yes	INT005816	162	162	NA	0	0	4	11	0	0	0	0	20	0	0	0	14	4	5	0	0	ruminants birds	NA	ERS3415280 (SAMEA5611090)
INT008830	Plate 21	P170066	UZ030317	KTS089AVN1	avian	w_avian	wildlife	KTS089	06/09/2016	KITISURU	110	1	-1.237836407	36.75603901	yes	INT008830	162	162	NA	0	0	0	0	0	0	0	0	0	7	0	0	0	0	0	0	0	birds	NA	ERS3415444 (SAMEA5611255)
INT008846	Plate 21	P170066	UZ030314	KTS089AVN8	avian	w_avian	wildlife	KTS089	06/09/2016	KITISURU	110	1	-1.237836407	36.75603901	yes	INT008846	162	162	NA	0	0	0	0	0	0	0	0	0	7	0	0	0	0	0	0	0	birds	NA	ERS3415445 (SAMEA5611256)
PLQ2453	Plate 18	P160773	UZ030659	KTS089GAL4	chickens	poultry	livestock	KTS089	06/09/2016	KITISURU	110	1	-1.237836407	36.75603901	yes	PLQ2453	162	162	NA	0	0	0	0	0	0	0	0	0	7	0	0	0	0	0	0	0	birds	NA	ERS3415624 (SAMEA5611435)
PLQ2462	Plate 18	P160773	UZ030649	KTS089GAL2	chickens	poultry	livestock	KTS089	06/09/2016	KITISURU	110	1	-1.237836407	36.75603901	yes	PLQ2462	162	162	NA	0	0	0	0	0	0	0	0	0	7	0	0	0	0	0	0	0	birds	NA	ERS3415626 (SAMEA5611437)
PLQ2468	Plate 18	P160773	UZ030656	KTS089GAL3	chickens	poultry	livestock	KTS089	06/09/2016	KITISURU	110	1	-1.237836407	36.75603901	yes	PLQ2468	162	162	NA	0	0	0	0	0	0	0	0	0	7	0	0	0	0	0	0	0	birds	NA	ERS3415627 (SAMEA5611438)
TMP018557	Plate 07	P160553	UZ026662	KYL025CAP10	goat	ruminant	livestock	KYL025	16/11/2015	KAYOLE	313	6	-1.265657435	36.91767563	yes	TMP018557	161	161	NA	0	1	14	0	0	0	0	0	0	0	0	2	0	0	0	0	0	ruminants birds	NA	ERS3415809 (SAMEA5611620)
ALQ020203	Plate 03	P160305	UZ026867	UTH029CAP5	goat	ruminant	livestock	UTH029	02/12/2015	UTHIRU	260	6	-1.259986667	36.70342	yes	ALQ020203	156	156	NA	0	0	0	6	0	0	0	0	115	0	0	0	0	0	0	0	0	ruminants birds	NA	ERS3414835 (SAMEA5610645)
ALQ020402	Plate 04	P160305	UZ026916	UTH029HUM3	human	human	human	UTH029	02/12/2015	UTHIRU	260	6	-1.259986667	36.70342	yes	ALQ020402	156	156	NA	0	0	0	6	0	0	0	0	115	0	0	0	0	0	0	0	0	ruminants birds	NA	ERS3414840 (SAMEA5610650)
INT004632	Plate 05	P160465	UZ027157	KRR037HUM1	human	human	human	KRR037	09/02/2016	KARURA	120	2	-1.215838333	36.8016	yes	INT004632	156	156	NA	0	5	0	0	0	0	0	0	6	250	0	0	0	0	0	0	0	ruminants birds	NA	ERS3415123 (SAMEA5610933)
INT005313	Plate 05	P160465	UZ027971	STC046HUM2	human	human	human	STC046	22/03/2016	SOUTH C	211	3	-1.325046667	36.81989167	yes	INT005313	156	156	NA	0	0	0	0	0	0	0	0	9	0	0	0	0	0	0	0	0	birds	NA	ERS3415213 (SAMEA5611023)
PLQ000554	Plate 13	P160720	UZ022132	NGN079OVN4	sheep	ruminant	livestock	NGN079	08/08/2016	NGUNDU	270	5	-1.268731667	37.06599	yes	PLQ000554	156	156	NA	6	0	0	0	10	0	0	0	3	0	0	0	0	0	0	0	0	ruminants birds other	NA	ERS3415535 (SAMEA5611346)
PLQ2489	Plate 18	P160773	UZ030779	KTS089HUM1	human	human	human	KTS089	06/09/2016	KITISURU	110	1	-1.237836407	36.75603901	yes	PLQ2489	156	156	NA	0	0	0	0	0	0	0	0	0	7	0	0	0	0	0	0	0	birds	NA	ERS3415630 (SAMEA5611441)
TMP016110	Plate 02	P160078	UZ025236	VIW003HUM1	human	human	human	VIW003	08/09/2015	VIWANDANI	312	7	-1.300886667	36.88674	no	TMP016110	156	156	NA	0	0	0	0	0	0	0	0	0	0	0	0	0	0	0	0	0	none	NA	ERS3415696 (SAMEA5611507)
TMP016375	Plate 02	P160078	UZ025228	MSA004SUI3	pig	monogastric	livestock	MSA004	14/09/2015	MOWLEM = SAIKA	311	6	-1.245281667	36.92033333	yes	TMP016375	156	156	NA	0	5	0	0	0	7	4	0	20	0	0	0	0	0	0	0	0	ruminants monogastrics birds other	NA	ERS3415728 (SAMEA5611539)
ALQ017349	Plate 07	P160553	UZ025715	HAR011GAL5	chickens	poultry	livestock	HAR011	05/10/2015	HARAMBEE	211	3	-1.287711667	36.87792167	yes	ALQ017349	155	155	NA	0	0	0	0	0	0	40	0	0	0	0	0	0	0	0	0	0	monogastrics birds	NA	ERS3414688 (SAMEA5610498)
ALQ017413	Plate 10	P160554	UZ025805	HAR010GAL5	chickens	poultry	livestock	HAR010	06/10/2015	HARAMBEE	211	3	-1.293191667	36.88320833	yes	ALQ017413	155	155	NA	0	0	0	0	0	0	0	0	5	0	0	0	0	0	0	0	0	birds	NA	ERS3414692 (SAMEA5610502)
ALQ019122	Plate 08	P160553	UZ026050	MAK017GAL4	chickens	poultry	livestock	MAK017	27/10/2015	MAKONGENI	230	6	-1.298248333	36.84727333	yes	ALQ019122	155	155	NA	0	0	0	0	0	0	5	1	30	0	0	0	0	0	0	0	0	monogastrics birds	NA	ERS3414727 (SAMEA5610537)
ALQ019662	Plate 11	P160719	UZ026617	KYL025HUM3	human	human	human	KYL025	16/11/2015	KAYOLE	313	6	-1.265657435	36.91767563	yes	ALQ019662	155	155	NA	0	1	14	0	0	0	0	0	0	0	0	2	0	0	0	0	0	ruminants birds	NA	ERS3414764 (SAMEA5610574)
ALQ019860	Plate 03	P160305	UZ026782	KYL026GAL3	chickens	poultry	livestock	KYL026	24/11/2015	KAYOLE	313	6	-1.276371667	36.920625	yes	ALQ019860	155	155	NA	0	0	0	0	0	14	0	0	40	0	0	0	0	0	0	0	0	monogastrics birds	NA	ERS3414787 (SAMEA5610597)
ALQ020076	Plate 03	P160305	UZ026485	UTH028BOV2	bovine	ruminant	livestock	UTH028	30/11/2015	UTHIRU	260	6	-1.263931667	36.70259	yes	ALQ020076	155	155	NA	0	7	0	0	0	0	0	0	0	0	0	0	0	0	0	0	0	ruminants	NA	ERS3414816 (SAMEA5610626)
ALQ020194	Plate 03	P160305	UZ026930	UTH029HUM4	human	human	human	UTH029	02/12/2015	UTHIRU	260	6	-1.259986667	36.70342	yes	ALQ020194	155	155	NA	0	0	0	6	0	0	0	0	115	0	0	0	0	0	0	0	0	ruminants birds	NA	ERS3414833 (SAMEA5610643)
ALQ034709	Plate 18	P160773	UZ035095	EMB085AVN1	avian	w_avian	wildlife	EMB085	22/08/2016	EMBAKASI	211	4	-1.311076667	36.89346167	yes	ALQ034709	155	155	NA	0	0	0	0	0	0	0	0	300	0	0	0	0	0	0	26	0	birds	NA	ERS3414952 (SAMEA5610762)
INT004160	Plate 10	P160554	UZ026958	DAN031HUM1	human	human	human	DAN031	11/01/2016	DANDORA 'B'	313	6	-1.241636667	36.90821167	yes	INT004160	155	155	NA	0	9	0	0	0	0	0	0	13	0	0	0	0	0	0	0	0	ruminants birds	NA	ERS3415054 (SAMEA5610864)
INT004165	Plate 09	P160554	UZ2004719	DAN031AVN7	avian	w_avian	wildlife	DAN031	11/01/2016	DANDORA 'B'	313	6	-1.241636667	36.90821167	yes	INT004165	155	155	NA	0	9	0	0	0	0	0	0	13	0	0	0	0	0	0	0	0	ruminants birds	NA	ERS3415055 (SAMEA5610865)
INT004446	Plate 05	P160465	UZ027081	UMJ035HUM3	human	human	human	UMJ035	26/01/2016	UMOJA	212	4	-1.282928333	36.88523333	yes	INT004446	155	155	NA	0	0	0	0	0	0	0	0	15	0	0	0	0	0	0	0	0	birds	NA	ERS3415096 (SAMEA5610906)
INT004470	Plate 06	P160465	UZ2004707	UMJ035ROD2	rodent	w_mammal	wildlife	UMJ035	26/01/2016	UMOJA	212	4	-1.282928333	36.88523333	yes	INT004470	155	155	NA	0	0	0	0	0	0	0	0	15	0	0	0	0	0	0	0	0	birds	NA	ERS3415099 (SAMEA5610909)
INT004560	Plate 05	P160465	UZ027103	UMJ036GAL3	chickens	poultry	livestock	UMJ036	27/01/2016	UMOJA	212	4	-1.278311667	36.88803	yes	INT004560	155	155	NA	0	0	5	0	0	0	28	0	24	0	0	0	0	0	3	0	0	ruminants monogastrics birds	NA	ERS3415114 (SAMEA5610924)
INT004590	Plate 06	P160465	UZ027172	UMJ036HUM1	human	human	human	UMJ036	27/01/2016	UMOJA	212	4	-1.278311667	36.88803	yes	INT004590	155	155	NA	0	0	5	0	0	0	28	0	24	0	0	0	0	0	3	0	0	ruminants monogastrics birds	NA	ERS3415119 (SAMEA5610929)
INT004674	Plate 05	P160465	UZ027222	KRR037BOV2	bovine	ruminant	livestock	KRR037	09/02/2016	KARURA	120	2	-1.215838333	36.8016	yes	INT004674	155	155	NA	0	5	0	0	0	0	0	0	6	250	0	0	0	0	0	0	0	ruminants birds	NA	ERS3415128 (SAMEA5610938)
INT004744	Plate 05	P160465	UZ027000	KRR038HUM1	human	human	human	KRR038	15/02/2016	KARURA	120	2	-1.216581667	36.79006167	no	INT004744	155	155	NA	0	0	0	0	0	0	0	0	0	0	0	0	0	0	0	0	0	none	NA	ERS3415137 (SAMEA5610947)
INT004746	Plate 06	P160465	UZ027206	KRR038HUM5	human	human	human	KRR038	15/02/2016	KARURA	120	2	-1.216581667	36.79006167	no	INT004746	155	155	NA	0	0	0	0	0	0	0	0	0	0	0	0	0	0	0	0	0	none	NA	ERS3415138 (SAMEA5610948)
INT005526	Plate 05	P160465	UZ2004927	KHW051AVN5	avian	w_avian	wildlife	KHW051	04/04/2016	KAHAWA WEST / JUJA K	311	6	-1.180833333	36.91151833	no	INT005526	155	155	NA	0	0	0	0	0	0	0	0	0	0	0	0	0	0	0	0	0	none	NA	ERS3415240 (SAMEA5611050)
INT005712	Plate 05	P160465	UZ028192	KHW050HUM6	human	human	human	KHW050	06/04/2016	KAHAWA WEST / JUJA K	311	6	-1.179393235	36.90742073	yes	INT005712	155	155	NA	0	0	4	11	0	0	0	0	20	0	0	0	14	4	5	0	0	ruminants birds	NA	ERS3415267 (SAMEA5611077)
INT005925	Plate 06	P160465	UZ028293	LUM053GAL1	chickens	poultry	livestock	LUM053	12/04/2016	LUMUMBA (JERICHO)	220	6	-1.292383333	36.87426	yes	INT005925	155	155	NA	0	0	0	0	0	0	0	0	15	0	0	0	0	0	0	0	0	birds	NA	ERS3415294 (SAMEA5611104)
INT005946	Plate 06	P160465	UZ028286	LUM053GAL3	chickens	poultry	livestock	LUM053	12/04/2016	LUMUMBA (JERICHO)	220	6	-1.292383333	36.87426	yes	INT005946	155	155	NA	0	0	0	0	0	0	0	0	15	0	0	0	0	0	0	0	0	birds	NA	ERS3415297 (SAMEA5611107)
INT007108	Plate 06	P160465	UZ028343	LUM054ANA1	ducks	poultry	livestock	LUM054	13/04/2016	LUMUMBA (JERICHO)	220	6	-1.293103333	36.871635	yes	INT007108	155	155	NA	0	0	44	0	0	0	0	0	5	0	0	12	0	0	0	0	0	ruminants birds	NA	ERS3415327 (SAMEA5611137)
INT007168	Plate 10	P160554	UZ028127	MWK055AV_POP1	av_pop	w_avian	wildlife	MWK055	26/04/2016	MWIKI	313	6	-1.23016808	36.93353817	no	INT007168	155	155	NA	0	0	0	0	0	0	0	0	0	0	0	0	0	0	0	0	0	none	NA	ERS3415334 (SAMEA5611144)
INT007652	Plate 08	P160553	UZ028819	KOR058HUM1	human	human	human	KOR058	09/05/2016	NYAYO (KOROGOCHO)	312	7	-1.25093	36.88799667	yes	INT007652	155	155	NA	0	0	17	0	1	0	0	0	20	0	0	3	0	0	0	0	0	ruminants birds	NA	ERS3415377 (SAMEA5611188)
INT008952	Plate 21	P170066	UZ030336	KTS090AVN4	avian	w_avian	wildlife	KTS090	07/09/2016	KITISURU	110	1	-1.24392994	36.78810775	no	INT008952	155	155	NA	0	0	0	0	0	0	0	0	0	0	0	0	0	0	0	0	0	none	NA	ERS3415447 (SAMEA5611258)
PLQ000645	Plate 15	P160810	UZ022170	NGN080GAL2	chickens	poultry	livestock	NGN080	09/08/2016	NGUNDU	270	5	-1.27306	37.05743667	yes	PLQ000645	155	155	NA	0	0	4	0	3	0	0	0	115	0	0	4	0	0	0	0	0	ruminants birds	NA	ERS3415549 (SAMEA5611360)
PLQ2193	Plate 15	P160810	UZ030750	KTS088HUM5	human	human	human	KTS088	05/09/2016	KITISURU	110	1	-1.232017083	36.75897979	yes	PLQ2193	155	155	NA	0	4	0	0	0	0	0	0	7	5	0	6	7	0	0	0	0	ruminants birds	NA	ERS3415594 (SAMEA5611405)
TMP015575	Plate 10	P160554	UZ025185	VIW002GAL1	chickens	poultry	livestock	VIW002	01/09/2015	VIWANDANI	312	7	-1.309915	36.878755	yes	TMP015575	155	155	NA	0	3	0	0	0	15	3	0	5	0	0	0	0	0	0	0	0	ruminants monogastrics birds	NA	ERS3415676 (SAMEA5611487)
TMP015782	Plate 02	P160078	UZ025142	VIW001GAL1	chickens	poultry	livestock	VIW001	31/08/2015	VIWANDANI	312	7	-1.313058333	36.85866167	yes	TMP015782	155	155	NA	0	0	0	4	0	0	0	0	200	0	0	0	0	5	0	0	0	ruminants birds	NA	ERS3415679 (SAMEA5611490)
TMP016016	Plate 01	P160078	UZ025262	MSA004BOV1	bovine	ruminant	livestock	MSA004	14/09/2015	MOWLEM = SAIKA	311	6	-1.245281667	36.92033333	yes	TMP016016	155	155	NA	0	5	0	0	0	7	4	0	20	0	0	0	0	0	0	0	0	ruminants monogastrics birds other	NA	ERS3415689 (SAMEA5611500)
TMP016116	Plate 17	P160773	UZ025294	VIWxxxROD4	rodent	w_mammal	wildlife	VIWxxx	NA	NA	NA	NA	NA	NA	NA	TMP016116	155	155	NA	NA	NA	NA	NA	NA	NA	NA	NA	NA	NA	NA	NA	NA	NA	NA	NA	NA	NA	NA	ERS3415697 (SAMEA5611508)
TMP016169	Plate 01	P160078	UZ025290	VIW001ROD1	rodent	w_mammal	wildlife	VIW001	31/08/2015	VIWANDANI	312	7	-1.313058333	36.85866167	yes	TMP016169	155	155	NA	0	0	0	4	0	0	0	0	200	0	0	0	0	5	0	0	0	ruminants birds	NA	ERS3415705 (SAMEA5611516)
TMP016205	Plate 04	P160305	UZ025472	MSA004AVN2	avian	w_avian	wildlife	MSA004	14/09/2015	MOWLEM = SAIKA	311	6	-1.245281667	36.92033333	yes	TMP016205	155	155	NA	0	5	0	0	0	7	4	0	20	0	0	0	0	0	0	0	0	ruminants monogastrics birds other	NA	ERS3415709 (SAMEA5611520)
TMP016344	Plate 01	P160078	UZ025743	HAR011GAL1	chickens	poultry	livestock	HAR011	05/10/2015	HARAMBEE	211	3	-1.287711667	36.87792167	yes	TMP016344	155	155	NA	0	0	0	0	0	0	40	0	0	0	0	0	0	0	0	0	0	monogastrics birds	NA	ERS3415723 (SAMEA5611534)
TMP016357	Plate 11	P160719	UZ025785	HAR010HUM3	human	human	human	HAR010	06/10/2015	HARAMBEE	211	3	-1.293191667	36.88320833	yes	TMP016357	155	155	NA	0	0	0	0	0	0	0	0	5	0	0	0	0	0	0	0	0	birds	NA	ERS3415725 (SAMEA5611536)
TMP016422	Plate 02	P160078	UZ025653	KAN008GAL1	chickens	poultry	livestock	KAN008	22/09/2015	KAREN	110	1	-1.338961667	36.70231333	yes	TMP016422	155	155	NA	0	0	0	0	0	0	0	0	140	0	0	0	0	0	0	0	0	birds	NA	ERS3415735 (SAMEA5611546)
TMP016569	Plate 02	P160078	UZ025534	MSA004HUM1	human	human	human	MSA004	14/09/2015	MOWLEM = SAIKA	311	6	-1.245281667	36.92033333	yes	TMP016569	155	155	NA	0	5	0	0	0	7	4	0	20	0	0	0	0	0	0	0	0	ruminants monogastrics birds other	NA	ERS3415750 (SAMEA5611561)
TMP016697	Plate 13	P160720	UZ025341	VIW002AVN1	avian	w_avian	wildlife	VIW002	01/09/2015	VIWANDANI	312	7	-1.309915	36.878755	yes	TMP016697	155	155	NA	0	3	0	0	0	15	3	0	5	0	0	0	0	0	0	0	0	ruminants monogastrics birds	NA	ERS3415759 (SAMEA5611570)
TMP018919	Plate 03	P160305	UZ026516	MLK024GAL4	chickens	poultry	livestock	MLK024	11/11/2015	MLANGO KUBWA	312	7	-1.26418	36.85309167	yes	TMP018919	155	155	NA	0	0	0	0	0	0	0	0	8	0	0	7	0	0	0	0	0	birds	NA	ERS3415821 (SAMEA5611632)
TMP019096	Plate 01	P160078	UZ026089	MAK017LAG2	rabbit	monogastric	livestock	MAK017	27/10/2015	MAKONGENI	230	6	-1.298248333	36.84727333	yes	TMP019096	155	155	NA	0	0	0	0	0	0	5	1	30	0	0	0	0	0	0	0	0	monogastrics birds	NA	ERS3415831 (SAMEA5611642)
TMP019218	Plate 11	P160719	UZ2004432	MAK018AVN2	avian	w_avian	wildlife	MAK018	27/10/2015	MAKONGENI	230	6	-1.296248	36.851973	no	TMP019218	155	155	NA	0	0	0	0	0	0	0	0	0	0	0	0	0	0	0	0	0	none	NA	ERS3415846 (SAMEA5611657)
TMP019516	Plate 03	P160305	UZ026262	KIG020BOV2	bovine	ruminant	livestock	KIG020	03/11/2015	KIRIGU	260	6	-1.29399	36.704215	yes	TMP019516	155	155	NA	0	3	2	0	0	0	0	0	3	0	0	0	0	0	0	0	0	ruminants birds	NA	ERS3415885 (SAMEA5611696)
TMP019822	Plate 15	P160810	UZ025999	MLK022ROD1	rodent	w_mammal	wildlife	MLK022	09/11/2015	MLANGO KUBWA	312	7	-1.265345	36.85309833	no	TMP019822	155	155	NA	0	0	0	0	0	0	0	0	0	0	0	0	0	0	0	0	0	none	NA	ERS3415919 (SAMEA5611730)
TMP019895	Plate 02	P160078	UZ026497	MLK024HUM3	human	human	human	MLK024	11/11/2015	MLANGO KUBWA	312	7	-1.26418	36.85309167	yes	TMP019895	155	155	NA	0	0	0	0	0	0	0	0	8	0	0	7	0	0	0	0	0	birds	NA	ERS3415931 (SAMEA5611742)
TMP019936	Plate 12	P160719	UZ2004635	MLK024AVN3	avian	w_avian	wildlife	MLK024	11/11/2015	MLANGO KUBWA	312	7	-1.26418	36.85309167	yes	TMP019936	155	155	NA	0	0	0	0	0	0	0	0	8	0	0	7	0	0	0	0	0	birds	NA	ERS3415934 (SAMEA5611745)
TMP020012	Plate 02	P160078	UZ026007	MAK016GAL2	chickens	poultry	livestock	MAK016	26/10/2015	MAKONGENI	230	6	-1.29896	36.84870833	yes	TMP020012	155	155	NA	0	0	0	0	0	0	0	0	11	0	0	0	0	0	0	0	0	birds	NA	ERS3415945 (SAMEA5611756)
TMP020955	Plate 14	P160720	UZ022063	GTN073ROD2	rodent	w_mammal	wildlife	GTN073	12/07/2016	GATINA	260	6	-1.27637736	36.75747462	yes	TMP020955	155	155	NA	0	4	0	0	0	0	0	0	6	0	0	0	0	0	0	0	0	ruminants birds	NA	ERS3416022 (SAMEA5611833)
TMP021071	Plate 13	P160720	UZ022334	GTN074OVN2	sheep	ruminant	livestock	GTN074	13/07/2016	GATINA	260	6	-1.291341667	36.75221	yes	TMP021071	155	155	NA	0	0	0	0	3	0	0	0	7	0	0	0	0	0	0	0	0	ruminants birds	NA	ERS3416040 (SAMEA5611851)
TMP021281	Plate 21	P170066	UZ035016	GWK076AVN5	avian	w_avian	wildlife	GWK076	19/07/2016	GATWIKIRA	312	7	-1.31708	36.77864167	yes	TMP021281	155	155	NA	0	0	0	0	0	20	0	0	0	0	16	0	0	0	0	0	0	monogastrics birds	NA	ERS3416071 (SAMEA5611882)
TMP021607	Plate 12	P160719	UZ028213	KHW050GAL3	chickens	poultry	livestock	KHW050	06/04/2016	KAHAWA WEST / JUJA K	311	6	-1.179393235	36.90742073	yes	TMP021607	155	155	NA	0	0	4	11	0	0	0	0	20	0	0	0	14	4	5	0	0	ruminants birds	NA	ERS3416086 (SAMEA5611897)
TMP021795	Plate 13	P160720	UZ028131	KHW049GAL6	chickens	poultry	livestock	KHW049	05/04/2016	KAHAWA WEST / JUJA K	311	6	-1.179655	36.90618833	yes	TMP021795	155	155	NA	0	5	0	0	0	0	0	0	18	0	0	0	0	0	0	0	0	ruminants birds	NA	ERS3416100 (SAMEA5611911)
TMP021900	Plate 10	P160554	UZ027383	KHW051ROD1	rodent	w_mammal	wildlife	KHW051	04/04/2016	KAHAWA WEST / JUJA K	311	6	-1.180833333	36.91151833	no	TMP021900	155	155	NA	0	0	0	0	0	0	0	0	0	0	0	0	0	0	0	0	0	none	NA	ERS3416103 (SAMEA5611914)
TMP023842	Plate 17	P160773	UZ030304	MGM096AVN4	avian	w_avian	wildlife	MGM096	21/09/2016	MUGUMOINI	212	4	-1.323066667	36.78586333	yes	TMP023842	155	155	NA	0	0	0	0	0	0	0	0	4	0	0	0	0	0	0	0	0	birds	NA	ERS3416149 (SAMEA5611961)
TMP024302	Plate 17	P160773	UZ030613	LOR099HUM2	human	human	human	LOR099	03/10/2016	LORESHO	120	1	-1.254446667	36.74716167	no	TMP024302	155	155	NA	0	0	0	0	0	0	0	0	0	0	0	0	0	0	0	0	0	none	NA	ERS3416217 (SAMEA5612029)
INT005987	Plate 09	P160554	UZ028075	LUM054ROD3	rodent	w_mammal	wildlife	LUM054	13/04/2016	LUMUMBA (JERICHO)	220	6	-1.293103333	36.871635	yes	INT005987	154	154	NA	0	0	44	0	0	0	0	0	5	0	0	12	0	0	0	0	0	ruminants birds	NA	ERS3415303 (SAMEA5611113)
INT005459	Plate 06	P160465	UZ028008	STC048HUM6	human	human	human	STC048	30/03/2016	SOUTH C	211	3	-1.324195	36.82088333	no	INT005459	141	141	NA	0	0	0	0	0	0	0	0	0	0	0	0	0	0	0	0	0	none	NA	ERS3415232 (SAMEA5611042)
INT007762	Plate 07	P160553	UZ027345	KOR059ROD1	rodent	w_mammal	wildlife	KOR059	10/05/2016	NYAYO (KOROGOCHO)	312	7	-1.253945	36.88923667	yes	INT007762	137	137	NA	0	0	0	0	0	10	0	0	0	0	0	0	0	0	0	0	0	monogastrics	NA	ERS3415392 (SAMEA5611203)
ALQ032758	Plate 14	P160720	UZ030131	MUT083HUM2	human	human	human	MUT083	16/08/2016	MUTHANGARI	110	2	-1.263035	36.79185	no	ALQ032758	131	131	NA	0	0	0	0	0	0	0	0	0	0	0	0	0	0	0	0	0	none	NA	ERS3414928 (SAMEA5610738)
INT004422	Plate 09	P160554	UZ027048	UMJ034HUM2	human	human	human	UMJ034	25/01/2016	UMOJA	212	4	-1.287877775	36.88810325	no	INT004422	131	131	NA	0	0	0	0	0	0	0	0	0	0	0	0	0	0	0	0	0	none	NA	ERS3415092 (SAMEA5610902)
INT004502	Plate 06	P160465	UZ026334	UMJ034ROD3	rodent	w_mammal	wildlife	UMJ034	25/01/2016	UMOJA	212	4	-1.287877775	36.88810325	no	INT004502	131	131	NA	0	0	0	0	0	0	0	0	0	0	0	0	0	0	0	0	0	none	NA	ERS3415104 (SAMEA5610914)
INT007976	Plate 08	P160553	UZ028883	KAS061AVN1	avian	w_avian	wildlife	KAS061	16/05/2016	KASARANI	321	5	-1.223748333	36.92381333	yes	INT007976	131	131	NA	0	0	3	0	0	10	0	0	9	0	0	0	0	0	0	0	0	ruminants monogastrics birds	NA	ERS3415423 (SAMEA5611234)
TMP016318	Plate 02	P160078	UZ025624	KAN007HUM4	human	human	human	KAN007	21/09/2015	KAREN	110	1	-1.360794419	36.71998186	yes	TMP016318	131	131	NA	0	6	0	0	0	0	0	0	0	0	0	0	2	0	0	0	0	ruminants birds other	NA	ERS3415720 (SAMEA5611531)
TMP019273	Plate 03	P160305	UZ026148	KIG019HUM4	human	human	human	KIG019	02/11/2015	KIRIGU	260	6	-1.291726667	36.70118333	yes	TMP019273	131	131	NA	0	0	16	0	0	2	0	0	5	0	0	0	0	0	0	0	0	ruminants monogastrics birds	NA	ERS3415851 (SAMEA5611662)
TMP019279	Plate 04	P160305	UZ026191	KIG019HUM5	human	human	human	KIG019	02/11/2015	KIRIGU	260	6	-1.291726667	36.70118333	yes	TMP019279	131	131	NA	0	0	16	0	0	2	0	0	5	0	0	0	0	0	0	0	0	ruminants monogastrics birds	NA	ERS3415852 (SAMEA5611663)
INT003626	Plate 12	P160719	UZ027123	UMJ036LAG2	rabbit	monogastric	livestock	UMJ036	27/01/2016	UMOJA	212	4	-1.278311667	36.88803	yes	INT003626	129	129	NA	0	0	5	0	0	0	28	0	24	0	0	0	0	0	3	0	0	ruminants monogastrics birds	NA	ERS3415033 (SAMEA5610843)
INT004728	Plate 06	P160465	UZ027235	KRR037GAL2	chickens	poultry	livestock	KRR037	09/02/2016	KARURA	120	2	-1.215838333	36.8016	yes	INT004728	129	129	NA	0	5	0	0	0	0	0	0	6	250	0	0	0	0	0	0	0	ruminants birds	NA	ERS3415136 (SAMEA5610946)
INT004906	Plate 06	P160465	UZ2004852	KIL041AVN2	avian	w_avian	wildlife	KIL041	08/03/2016	KILIMANI	110	2	-1.291786185	36.78376162	yes	INT004906	129	129	NA	0	0	0	3	3	0	33	0	167	0	0	6	3	4	6	0	0	ruminants monogastrics birds	NA	ERS3415161 (SAMEA5610971)
TMP020777	Plate 10	P160554	UZ028244	KWG071LAG2	rabbit	monogastric	livestock	KWG071	05/07/2016	KAWANGWARE	260	6	-1.280645	36.74687667	yes	TMP020777	129	129	NA	0	0	22	0	3	1	2	0	0	0	0	0	3	0	2	0	0	ruminants monogastrics birds	NA	ERS3415994 (SAMEA5611805)
ALQ034916	Plate 12	P160719	UZ030804	KTS090HUM1	human	human	human	KTS090	07/09/2016	KITISURU	110	1	-1.24392994	36.78810775	no	ALQ034916	127	127	NA	0	0	0	0	0	0	0	0	0	0	0	0	0	0	0	0	0	none	NA	ERS3414973 (SAMEA5610783)
TMP019362	Plate 11	P160719	UZ2004518	KIG019AVN9	avian	w_avian	wildlife	KIG019	02/11/2015	KIRIGU	260	6	-1.291726667	36.70118333	yes	TMP019362	127	127	NA	0	0	16	0	0	2	0	0	5	0	0	0	0	0	0	0	0	ruminants monogastrics birds	NA	ERS3415865 (SAMEA5611676)
TWAG1742	Plate 17	P160773	UZ030546	BOM091MEL1	turkeys	poultry	livestock	BOM091	13/09/2016	BOMAS	211	3	-1.320306667	36.78094667	yes	TWAG1742	127	127	NA	0	0	0	0	0	0	2	0	15	0	0	0	2	3	2	0	3	monogastrics birds	NA	ERS3416263 (SAMEA5612075)
INT004657	Plate 05	P160465	UZ026903	KRR037GAL9	chickens	poultry	livestock	KRR037	09/02/2016	KARURA	120	2	-1.215838333	36.8016	yes	INT004657	124	124	NA	0	5	0	0	0	0	0	0	6	250	0	0	0	0	0	0	0	ruminants birds	NA	ERS3415126 (SAMEA5610936)
TMP016749	Plate 13	P160720	UZ025518	HAR010AVN3	avian	w_avian	wildlife	HAR010	06/10/2015	HARAMBEE	211	3	-1.293191667	36.88320833	yes	TMP016749	121	121	NA	0	0	0	0	0	0	0	0	5	0	0	0	0	0	0	0	0	birds	NA	ERS3415760 (SAMEA5611571)
INT005193	Plate 09	P160554	UZ027477	EAS044ROD2	rodent	w_mammal	wildlife	EAS044	15/03/2016	EASTLEIGH NORTH	330	5	-1.268461667	36.84851	yes	INT005193	118	118	NA	0	0	5	0	0	0	0	0	0	0	0	0	0	0	2	0	0	ruminants birds	NA	ERS3415198 (SAMEA5611008)
INT004482	Plate 06	P160465	UZ027068	UMJ035GAL2	chickens	poultry	livestock	UMJ035	26/01/2016	UMOJA	212	4	-1.282928333	36.88523333	yes	INT004482	117	117	NA	0	0	0	0	0	0	0	0	15	0	0	0	0	0	0	0	0	birds	NA	ERS3415101 (SAMEA5610911)
TMP016831	Plate 01	P160078	UZ025707	HAR011GAL4	chickens	poultry	livestock	HAR011	05/10/2015	HARAMBEE	211	3	-1.287711667	36.87792167	yes	TMP016831	117	117	NA	0	0	0	0	0	0	40	0	0	0	0	0	0	0	0	0	0	monogastrics birds	NA	ERS3415765 (SAMEA5611576)
ALQ017237	Plate 01	P160078	UZ025777	HAR011LAG1	rabbit	monogastric	livestock	HAR011	05/10/2015	HARAMBEE	211	3	-1.287711667	36.87792167	yes	ALQ017237	117*	117	NA	0	0	0	0	0	0	40	0	0	0	0	0	0	0	0	0	0	monogastrics birds	NA	ERS3414676 (SAMEA5610486)
INT004821	Plate 08	P160553	UZ027273	KRR039GAL5	chickens	poultry	livestock	KRR039	22/02/2016	KARURA	120	2	-1.224276667	36.82658833	yes	INT004821	115	115	NA	0	0	0	0	0	0	0	0	0	0	700	0	0	0	0	0	0	birds	NA	ERS3415149 (SAMEA5610959)
ALQ019823	Plate 10	P160554	UZ025977	UTH028BAT1	bat	w_bat	wildlife	UTH028	30/11/2015	UTHIRU	260	6	-1.263931667	36.70259	yes	ALQ019823	110	110	NA	0	7	0	0	0	0	0	0	0	0	0	0	0	0	0	0	0	ruminants	NA	ERS3414780 (SAMEA5610590)
PLQ000899	Plate 17	P160773	UZ035151	MUT082AVN3	avian	w_avian	wildlife	MUT082	15/08/2016	MUTHANGARI	110	2	-1.2663	36.782315	yes	PLQ000899	110	110	NA	0	2	0	1	0	0	3	0	13	0	0	0	0	0	0	0	0	ruminants monogastrics birds	NA	ERS3415574 (SAMEA5611385)
TMP020000	Plate 02	P160078	UZ026020	MAK016GAL3	chickens	poultry	livestock	MAK016	26/10/2015	MAKONGENI	230	6	-1.29896	36.84870833	yes	TMP020000	104	104	NA	0	0	0	0	0	0	0	0	11	0	0	0	0	0	0	0	0	birds	NA	ERS3415944 (SAMEA5611755)
ALQ020088	Plate 04	P160305	UZ026507	UTH028BOV7	bovine	ruminant	livestock	UTH028	30/11/2015	UTHIRU	260	6	-1.263931667	36.70259	yes	ALQ020088	101	101	NA	0	7	0	0	0	0	0	0	0	0	0	0	0	0	0	0	0	ruminants	NA	ERS3414818 (SAMEA5610628)
ALQ020412	Plate 10	P160554	UZ026719	UTH029ROD2	rodent	w_mammal	wildlife	UTH029	02/12/2015	UTHIRU	260	6	-1.259986667	36.70342	yes	ALQ020412	101	101	NA	0	0	0	6	0	0	0	0	115	0	0	0	0	0	0	0	0	ruminants birds	NA	ERS3414842 (SAMEA5610652)
ALQ023158	Plate 08	P160553	UZ027594	KAS063CAP2	goat	ruminant	livestock	KAS063	18/05/2016	KASARANI	321	5	-1.22741664	36.92116014	yes	ALQ023158	101	101	NA	0	0	0	5	0	0	0	0	5	0	0	0	0	0	0	0	0	ruminants birds	NA	ERS3414859 (SAMEA5610669)
ALQ028450	Plate 12	P160719	UZ028832	KOR059SUI4	pig	monogastric	livestock	KOR059	10/05/2016	NYAYO (KOROGOCHO)	312	7	-1.253945	36.88923667	yes	ALQ028450	101	101	NA	0	0	0	0	0	10	0	0	0	0	0	0	0	0	0	0	0	monogastrics	NA	ERS3414909 (SAMEA5610719)
TMP015713	Plate 02	P160078	UZ025144	VIW001GAL4	chickens	poultry	livestock	VIW001	31/08/2015	VIWANDANI	312	7	-1.313058333	36.85866167	yes	TMP015713	101	101	NA	0	0	0	4	0	0	0	0	200	0	0	0	0	5	0	0	0	ruminants birds	NA	ERS3415677 (SAMEA5611488)
TMP016910	Plate 04	P160305	UZ025799	HAR010GAL2	chickens	poultry	livestock	HAR010	06/10/2015	HARAMBEE	211	3	-1.293191667	36.88320833	yes	TMP016910	101	101	NA	0	0	0	0	0	0	0	0	5	0	0	0	0	0	0	0	0	birds	NA	ERS3415774 (SAMEA5611585)
TMP019133	Plate 02	P160078	UZ026072	MAK017HUM2	human	human	human	MAK017	27/10/2015	MAKONGENI	230	6	-1.298248333	36.84727333	yes	TMP019133	101	101	NA	0	0	0	0	0	0	5	1	30	0	0	0	0	0	0	0	0	monogastrics birds	NA	ERS3415836 (SAMEA5611647)
TMP020763	Plate 09	P160554	UZ021999	KWG071SUI1	pig	monogastric	livestock	KWG071	05/07/2016	KAWANGWARE	260	6	-1.280645	36.74687667	yes	TMP020763	101	101	NA	0	0	22	0	3	1	2	0	0	0	0	0	3	0	2	0	0	ruminants monogastrics birds	NA	ERS3415992 (SAMEA5611803)
TMP020784	Plate 16	P160810	UZ028795	KWG071CAP1	goat	ruminant	livestock	KWG071	05/07/2016	KAWANGWARE	260	6	-1.280645	36.74687667	yes	TMP020784	101	101	NA	0	0	22	0	3	1	2	0	0	0	0	0	3	0	2	0	0	ruminants monogastrics birds	NA	ERS3415995 (SAMEA5611806)
TMP021244	Plate 19	P160812	UZ030003	GWK076SUI2	pig	monogastric	livestock	GWK076	19/07/2016	GATWIKIRA	312	7	-1.31708	36.77864167	yes	TMP021244	101	101	NA	0	0	0	0	0	20	0	0	0	0	16	0	0	0	0	0	0	monogastrics birds	NA	ERS3416065 (SAMEA5611876)
TWAG1688	Plate 18	P160773	UZ030603	BOM091HUM3	human	human	human	BOM091	13/09/2016	BOMAS	211	3	-1.320306667	36.78094667	yes	TWAG1688	101	101	NA	0	0	0	0	0	0	2	0	15	0	0	0	2	3	2	0	3	monogastrics birds	NA	ERS3416254 (SAMEA5612066)
TMP024261	Plate 21	P170066	UZ035290	LOR098BAT4	bat	w_bat	wildlife	LOR098	28/09/2016	LORESHO	120	1	-1.24741938	36.7508106	yes	TMP024261	99	99	NA	0	0	3	0	1	0	0	0	21	14	0	2	0	0	0	0	0	ruminants birds	NA	ERS3416211 (SAMEA5612023)
ALQ020439	Plate 04	P160305	UZ026694	UTH028AVN7	avian	w_avian	wildlife	UTH028	30/11/2015	UTHIRU	260	6	-1.263931667	36.70259	yes	ALQ020439	93	93	NA	0	7	0	0	0	0	0	0	0	0	0	0	0	0	0	0	0	ruminants	NA	ERS3414846 (SAMEA5610656)
INT007556	Plate 07	P160553	UZ028725	MWK057SUI4	pig	monogastric	livestock	MWK057	05/05/2016	MWIKI	313	6	-1.229788913	36.92984478	yes	INT007556	93	93	NA	0	0	4	0	0	11	0	0	4	0	0	16	0	0	0	0	0	ruminants monogastrics birds	NA	ERS3415365 (SAMEA5611176)
INT010086	Plate 17	P160773	UZ030638	SPV100ANA3	geese	poultry	livestock	SPV100	05/10/2016	SPRING VALLEY	110	2	-1.254815	36.77469833	yes	INT010086	93	93	NA	0	0	0	0	0	0	4	0	1	0	0	9	4	1	1	70	0	monogastrics birds	NA	ERS3415466 (SAMEA5611277)
PLQ000468	Plate 13	P160720	UZ022271	GWK078GAL2	chickens	poultry	livestock	GWK078	25/07/2016	GATWIKIRA	312	7	-1.314113333	36.78104167	yes	PLQ000468	93	93	NA	0	0	0	0	0	0	0	0	16	0	0	0	0	0	0	0	0	birds	NA	ERS3415521 (SAMEA5611332)
TMP017049	Plate 01	P160078	UZ025845	MBO014ANA1	ducks	poultry	livestock	MBO014	12/10/2015	MBOTELA	240	5	-1.298803333	36.86333833	yes	TMP017049	93	93	NA	0	0	0	0	0	0	3	3	12	0	0	8	0	3	0	0	0	monogastrics birds	NA	ERS3415783 (SAMEA5611594)
TMP019418	Plate 02	P160078	UZ026165	KIG019HUM7	human	human	human	KIG019	02/11/2015	KIRIGU	260	6	-1.291726667	36.70118333	yes	TMP019418	93	93	NA	0	0	16	0	0	2	0	0	5	0	0	0	0	0	0	0	0	ruminants monogastrics birds	NA	ERS3415872 (SAMEA5611683)
TMP024245	Plate 21	P170066	UZ035285	LOR098BAT2	bat	w_bat	wildlife	LOR098	28/09/2016	LORESHO	120	1	-1.24741938	36.7508106	yes	TMP024245	93	93	NA	0	0	3	0	1	0	0	0	21	14	0	2	0	0	0	0	0	ruminants birds	NA	ERS3416209 (SAMEA5612021)
INT006356	Plate 15	P160810	UZ029601	MIH067NUM3	guinea_fowl	poultry	livestock	MIH067	07/06/2016	MIHANGO	270	5	-1.273335	36.944275	yes	INT006356	90	90	NA	0	3	0	0	0	0	0	0	30	0	0	0	0	11	0	0	0	ruminants birds	NA	ERS3415313 (SAMEA5611123)
ALQ020410	Plate 04	P160305	UZ026886	UTH029GAL3	chickens	poultry	livestock	UTH029	02/12/2015	UTHIRU	260	6	-1.259986667	36.70342	yes	ALQ020410	88	88	NA	0	0	0	6	0	0	0	0	115	0	0	0	0	0	0	0	0	ruminants birds	NA	ERS3414841 (SAMEA5610651)
ALQ023482	Plate 21	P170066	UZ035018	GWK078ROD1	rodent	w_mammal	wildlife	GWK078	25/07/2016	GATWIKIRA	312	7	-1.314113333	36.78104167	yes	ALQ023482	88	88	NA	0	0	0	0	0	0	0	0	16	0	0	0	0	0	0	0	0	birds	NA	ERS3414888 (SAMEA5610698)
PLQ2176	Plate 18	P160773	UZ030388	KTS088AVN8	avian	w_avian	wildlife	KTS088	05/09/2016	KITISURU	110	1	-1.232017083	36.75897979	yes	PLQ2176	86	86	NA	0	4	0	0	0	0	0	0	7	5	0	6	7	0	0	0	0	ruminants birds	NA	ERS3415591 (SAMEA5611402)
ALQ019267	Plate 11	P160719	UZ026271	KIG020GAL3	chickens	poultry	livestock	KIG020	03/11/2015	KIRIGU	260	6	-1.29399	36.704215	yes	ALQ019267	77	77	NA	0	3	2	0	0	0	0	0	3	0	0	0	0	0	0	0	0	ruminants birds	NA	ERS3414731 (SAMEA5610541)
INT004848	Plate 06	P160465	UZ2004701	KRR038ROD1	rodent	w_mammal	wildlife	KRR038	15/02/2016	KARURA	120	2	-1.216581667	36.79006167	no	INT004848	73	73	NA	0	0	0	0	0	0	0	0	0	0	0	0	0	0	0	0	0	none	NA	ERS3415151 (SAMEA5610961)
INT004856	Plate 05	P160465	UZ2004698	KRR038ROD3	rodent	w_mammal	wildlife	KRR038	15/02/2016	KARURA	120	2	-1.216581667	36.79006167	no	INT004856	73	73	NA	0	0	0	0	0	0	0	0	0	0	0	0	0	0	0	0	0	none	NA	ERS3415152 (SAMEA5610962)
INT004865	Plate 09	P160554	UZ2004699	KRR038ROD2	rodent	w_mammal	wildlife	KRR038	15/02/2016	KARURA	120	2	-1.216581667	36.79006167	no	INT004865	73	73	NA	0	0	0	0	0	0	0	0	0	0	0	0	0	0	0	0	0	none	NA	ERS3415154 (SAMEA5610964)
ALQ032869	Plate 14	P160720	UZ030159	MUT084HUM2	human	human	human	MUT084	17/08/2016	MUTHANGARI	110	2	-1.265065	36.78292	yes	ALQ032869	69	69	NA	0	0	0	2	0	0	0	0	2	0	0	0	0	0	0	0	0	ruminants birds	NA	ERS3414935 (SAMEA5610745)
ALQ034796	Plate 17	P160773	UZ030424	EMB086HUM2	human	human	human	EMB086	23/08/2016	EMBAKASI	211	4	-1.310175	36.89392833	no	ALQ034796	69	69	NA	0	0	0	0	0	0	0	0	0	0	0	0	0	0	0	0	0	none	NA	ERS3414961 (SAMEA5610771)
ALQ034923	Plate 11	P160719	UZ030556	KTS090HUM2	human	human	human	KTS090	07/09/2016	KITISURU	110	1	-1.24392994	36.78810775	no	ALQ034923	69	69	NA	0	0	0	0	0	0	0	0	0	0	0	0	0	0	0	0	0	none	NA	ERS3414974 (SAMEA5610784)
INT004785	Plate 10	P160554	UZ027266	KRR039HUM1	human	human	human	KRR039	22/02/2016	KARURA	120	2	-1.224276667	36.82658833	yes	INT004785	69	69	NA	0	0	0	0	0	0	0	0	0	0	700	0	0	0	0	0	0	birds	NA	ERS3415144 (SAMEA5610954)
INT005465	Plate 06	P160465	UZ028001	STC048HUM5	human	human	human	STC048	30/03/2016	SOUTH C	211	3	-1.324195	36.82088333	no	INT005465	69	69	NA	0	0	0	0	0	0	0	0	0	0	0	0	0	0	0	0	0	none	NA	ERS3415233 (SAMEA5611043)
INT005715	Plate 05	P160465	UZ028188	KHW050HUM3	human	human	human	KHW050	06/04/2016	KAHAWA WEST / JUJA K	311	6	-1.179393235	36.90742073	yes	INT005715	69	69	NA	0	0	4	11	0	0	0	0	20	0	0	0	14	4	5	0	0	ruminants birds	NA	ERS3415268 (SAMEA5611078)
INT007704	Plate 08	P160553	UZ028709	MWK055AV_POP9	av_pop	w_avian	wildlife	MWK055	26/04/2016	MWIKI	313	6	-1.23016808	36.93353817	no	INT007704	69	69	NA	0	0	0	0	0	0	0	0	0	0	0	0	0	0	0	0	0	none	NA	ERS3415385 (SAMEA5611196)
PLQ2287	Plate 15	P160810	UZ030744	KTS088HUM3	human	human	human	KTS088	05/09/2016	KITISURU	110	1	-1.232017083	36.75897979	yes	PLQ2287	69	69	NA	0	4	0	0	0	0	0	0	7	5	0	6	7	0	0	0	0	ruminants birds	NA	ERS3415608 (SAMEA5611419)
TMP024287	Plate 18	P160773	UZ030618	LOR099HUM6	human	human	human	LOR099	03/10/2016	LORESHO	120	1	-1.254446667	36.74716167	no	TMP024287	69	69	NA	0	0	0	0	0	0	0	0	0	0	0	0	0	0	0	0	0	none	NA	ERS3416215 (SAMEA5612027)
ALQ028010	Plate 04	P160305	UZ027667	KIL041HUM3	human	human	human	KIL041	08/03/2016	KILIMANI	110	2	-1.291786185	36.78376162	yes	ALQ028010	62	62	NA	0	0	0	3	3	0	33	0	167	0	0	6	3	4	6	0	0	ruminants monogastrics birds	NA	ERS3414890 (SAMEA5610700)
INT005477	Plate 14	P160720	UZ027999	STC048HUM3	human	human	human	STC048	30/03/2016	SOUTH C	211	3	-1.324195	36.82088333	no	INT005477	59	59	NA	0	0	0	0	0	0	0	0	0	0	0	0	0	0	0	0	0	none	NA	ERS3415234 (SAMEA5611044)
INT007968	Plate 16	P160810	UZ029168	KAS061HUM1	human	human	human	KAS061	16/05/2016	KASARANI	321	5	-1.223748333	36.92381333	yes	INT007968	59	59	NA	0	0	3	0	0	10	0	0	9	0	0	0	0	0	0	0	0	ruminants monogastrics birds	NA	ERS3415421 (SAMEA5611232)
TMP015801	Plate 04	P160305	UZ2006084	VIW001HUM6	human	human	human	VIW001	31/08/2015	VIWANDANI	312	7	-1.313058333	36.85866167	yes	TMP015801	59	59	NA	0	0	0	4	0	0	0	0	200	0	0	0	0	5	0	0	0	ruminants birds	NA	ERS3415682 (SAMEA5611493)
TMP021025	Plate 15	P160810	UZ021967	GTN074HUM1	human	human	human	GTN074	13/07/2016	GATINA	260	6	-1.291341667	36.75221	yes	TMP021025	59	59	NA	0	0	0	0	3	0	0	0	7	0	0	0	0	0	0	0	0	ruminants birds	NA	ERS3416032 (SAMEA5611843)
TMP024110	Plate 19	P160812	UZ030967	LOR098HUM1	human	human	human	LOR098	28/09/2016	LORESHO	120	1	-1.24741938	36.7508106	yes	TMP024110	59	59	NA	0	0	3	0	1	0	0	0	21	14	0	2	0	0	0	0	0	ruminants birds	NA	ERS3416189 (SAMEA5612001)
ALQ019495	Plate 01	P160078	UZ026528	MLK024HUM4	human	human	human	MLK024	11/11/2015	MLANGO KUBWA	312	7	-1.26418	36.85309167	yes	ALQ019495	58	58	NA	0	0	0	0	0	0	0	0	8	0	0	7	0	0	0	0	0	birds	NA	ERS3414741 (SAMEA5610551)
ALQ019899	Plate 11	P160719	UZ026763	KYL026AVN9	avian	w_avian	wildlife	KYL026	24/11/2015	KAYOLE	313	6	-1.276371667	36.920625	yes	ALQ019899	58	58	NA	0	0	0	0	0	14	0	0	40	0	0	0	0	0	0	0	0	monogastrics birds	NA	ERS3414793 (SAMEA5610603)
ALQ034792	Plate 11	P160719	UZ030453	EMB087HUM1	human	human	human	EMB087	24/08/2016	EMBAKASI	211	4	-1.310101667	36.89491333	yes	ALQ034792	58	58	NA	0	0	0	0	0	0	6	0	20	0	0	0	0	0	0	0	0	monogastrics birds	NA	ERS3414960 (SAMEA5610770)
INT004170	Plate 09	P160554	UZ2004723	DAN031AVN6	avian	w_avian	wildlife	DAN031	11/01/2016	DANDORA 'B'	313	6	-1.241636667	36.90821167	yes	INT004170	58	58	NA	0	9	0	0	0	0	0	0	13	0	0	0	0	0	0	0	0	ruminants birds	NA	ERS3415056 (SAMEA5610866)
INT005209	Plate 09	P160554	UZ2004819	EAS044AVN4	avian	w_avian	wildlife	EAS044	15/03/2016	EASTLEIGH NORTH	330	5	-1.268461667	36.84851	yes	INT005209	58	58	NA	0	0	5	0	0	0	0	0	0	0	0	0	0	0	2	0	0	ruminants birds	NA	ERS3415200 (SAMEA5611010)
INT005224	Plate 05	P160465	UZ027721	EAS044CAP5	goat	ruminant	livestock	EAS044	15/03/2016	EASTLEIGH NORTH	330	5	-1.268461667	36.84851	yes	INT005224	58	58	NA	0	0	5	0	0	0	0	0	0	0	0	0	0	0	2	0	0	ruminants birds	NA	ERS3415203 (SAMEA5611013)
INT005879	Plate 06	P160465	UZ028272	LUM052HUM1	human	human	human	LUM052	11/04/2016	LUMUMBA (JERICHO)	220	6	-1.291	36.868835	no	INT005879	58	58	NA	0	0	0	0	0	0	0	0	0	0	0	0	0	0	0	0	0	none	NA	ERS3415287 (SAMEA5611097)
INT007394	Plate 08	P160553	UZ028313	MWK056ANA3	ducks	poultry	livestock	MWK056	03/05/2016	MWIKI	313	6	-1.231583333	36.93017333	yes	INT007394	58	58	NA	0	0	4	0	0	10	0	0	0	0	0	7	0	0	0	0	0	ruminants monogastrics birds	NA	ERS3415340 (SAMEA5611150)
INT007457	Plate 07	P160553	UZ028549	MWK056HUM1	human	human	human	MWK056	03/05/2016	MWIKI	313	6	-1.231583333	36.93017333	yes	INT007457	58	58	NA	0	0	4	0	0	10	0	0	0	0	0	7	0	0	0	0	0	ruminants monogastrics birds	NA	ERS3415351 (SAMEA5611161)
INT007533	Plate 08	P160553	UZ028546	MWK056HUM2	human	human	human	MWK056	03/05/2016	MWIKI	313	6	-1.231583333	36.93017333	yes	INT007533	58	58	NA	0	0	4	0	0	10	0	0	0	0	0	7	0	0	0	0	0	ruminants monogastrics birds	NA	ERS3415361 (SAMEA5611172)
INT007659	Plate 07	P160553	UZ028821	KOR058HUM2	human	human	human	KOR058	09/05/2016	NYAYO (KOROGOCHO)	312	7	-1.25093	36.88799667	yes	INT007659	58	58	NA	0	0	17	0	1	0	0	0	20	0	0	3	0	0	0	0	0	ruminants birds	NA	ERS3415378 (SAMEA5611189)
INT007882	Plate 07	P160553	UZ029150	KAS061SUI2	pig	monogastric	livestock	KAS061	16/05/2016	KASARANI	321	5	-1.223748333	36.92381333	yes	INT007882	58	58	NA	0	0	3	0	0	10	0	0	9	0	0	0	0	0	0	0	0	ruminants monogastrics birds	NA	ERS3415408 (SAMEA5611219)
PL015025	Plate 02	P160078	UZ025162	MBO013HUM1	human	human	human	MBO013	13/10/2015	MBOTELA	240	5	-1.298876667	36.86243	yes	PL015025	58	58	NA	0	0	7	0	0	0	0	0	0	0	0	0	0	0	0	0	0	ruminants	NA	ERS3415481 (SAMEA5611292)
PLQ000963	Plate 17	P160773	UZ035171	MUT084BAT1	bat	w_bat	wildlife	MUT084	17/08/2016	MUTHANGARI	110	2	-1.265065	36.78292	yes	PLQ000963	58	58	NA	0	0	0	2	0	0	0	0	2	0	0	0	0	0	0	0	0	ruminants birds	NA	ERS3415581 (SAMEA5611392)
PLQ000973	Plate 18	P160773	UZ035168	MUT084BAT4	bat	w_bat	wildlife	MUT084	17/08/2016	MUTHANGARI	110	2	-1.265065	36.78292	yes	PLQ000973	58	58	NA	0	0	0	2	0	0	0	0	2	0	0	0	0	0	0	0	0	ruminants birds	NA	ERS3415583 (SAMEA5611394)
TMP015114	Plate 08	P160553	UZ025259	MSA004BOV3	bovine	ruminant	livestock	MSA004	14/09/2015	MOWLEM = SAIKA	311	6	-1.245281667	36.92033333	yes	TMP015114	58	58	NA	0	5	0	0	0	7	4	0	20	0	0	0	0	0	0	0	0	ruminants monogastrics birds other	NA	ERS3415648 (SAMEA5611459)
TMP016515	Plate 02	P160078	UZ025410	MSA004GAL5	chickens	poultry	livestock	MSA004	14/09/2015	MOWLEM = SAIKA	311	6	-1.245281667	36.92033333	yes	TMP016515	58	58	NA	0	5	0	0	0	7	4	0	20	0	0	0	0	0	0	0	0	ruminants monogastrics birds other	NA	ERS3415745 (SAMEA5611556)
TMP019138	Plate 02	P160078	UZ026064	MAK017GAL10	chickens	poultry	livestock	MAK017	27/10/2015	MAKONGENI	230	6	-1.298248333	36.84727333	yes	TMP019138	58	58	NA	0	0	0	0	0	0	5	1	30	0	0	0	0	0	0	0	0	monogastrics birds	NA	ERS3415837 (SAMEA5611648)
TMP019571	Plate 04	P160305	UZ026244	KIG020HUM3	human	human	human	KIG020	03/11/2015	KIRIGU	260	6	-1.29399	36.704215	yes	TMP019571	58	58	NA	0	3	2	0	0	0	0	0	3	0	0	0	0	0	0	0	0	ruminants birds	NA	ERS3415893 (SAMEA5611704)
TMP020025	Plate 02	P160078	UZ026012	MAK016HUM2	human	human	human	MAK016	26/10/2015	MAKONGENI	230	6	-1.29896	36.84870833	yes	TMP020025	58	58	NA	0	0	0	0	0	0	0	0	11	0	0	0	0	0	0	0	0	birds	NA	ERS3415947 (SAMEA5611758)
TMP020494	Plate 10	P160554	UZ029984	KWG070BOV1	bovine	ruminant	livestock	KWG070	04/07/2016	KAWANGWARE	260	6	-1.278915	36.74525167	yes	TMP020494	58	58	NA	0	1	22	0	25	0	0	0	0	0	0	0	0	0	0	0	0	ruminants	NA	ERS3415970 (SAMEA5611781)
TMP020751	Plate 10	P160554	UZ028788	KWG071OVN1	sheep	ruminant	livestock	KWG071	05/07/2016	KAWANGWARE	260	6	-1.280645	36.74687667	yes	TMP020751	58	58	NA	0	0	22	0	3	1	2	0	0	0	0	0	3	0	2	0	0	ruminants monogastrics birds	NA	ERS3415990 (SAMEA5611801)
TMP020771	Plate 10	P160554	UZ021995	KWG071OVN3	sheep	ruminant	livestock	KWG071	05/07/2016	KAWANGWARE	260	6	-1.280645	36.74687667	yes	TMP020771	58	58	NA	0	0	22	0	3	1	2	0	0	0	0	0	3	0	2	0	0	ruminants monogastrics birds	NA	ERS3415993 (SAMEA5611804)
TMP021076	Plate 21	P170066	UZ022054	GTN074AVN2	avian	w_avian	wildlife	GTN074	13/07/2016	GATINA	260	6	-1.291341667	36.75221	yes	TMP021076	58	58	NA	0	0	0	0	3	0	0	0	7	0	0	0	0	0	0	0	0	ruminants birds	NA	ERS3416041 (SAMEA5611852)
TMP023862	Plate 19	P160812	UZ030937	MGM096HUM2	human	human	human	MGM096	21/09/2016	MUGUMOINI	212	4	-1.323066667	36.78586333	yes	TMP023862	58	58	NA	0	0	0	0	0	0	0	0	4	0	0	0	0	0	0	0	0	birds	NA	ERS3416152 (SAMEA5611964)
TMP024091	Plate 19	P160812	UZ031051	LOR097NUM4	guinea_fowl	poultry	livestock	LOR097	27/09/2016	LORESHO	110	1	-1.247168333	36.764595	yes	TMP024091	58	58	NA	0	0	0	0	0	0	0	0	13	0	0	0	0	16	0	0	0	birds	NA	ERS3416186 (SAMEA5611998)
TMP024225	Plate 18	P160773	UZ031086	LOR098CAP2	goat	ruminant	livestock	LOR098	28/09/2016	LORESHO	120	1	-1.24741938	36.7508106	yes	TMP024225	58	58	NA	0	0	3	0	1	0	0	0	21	14	0	2	0	0	0	0	0	ruminants birds	NA	ERS3416206 (SAMEA5612018)
TWAG1826	Plate 18	P160773	UZ022239	BOM092HUM2	human	human	human	BOM092	14/09/2016	BOMAS	211	3	-1.323251667	36.77964333	yes	TWAG1826	58	58	NA	0	0	13	0	0	0	0	0	10	0	0	0	0	0	0	0	0	ruminants birds	NA	ERS3416276 (SAMEA5612088)
TWAG1926	Plate 17	P160773	UZ030372	MGM094AVN3	avian	w_avian	wildlife	MGM094	19/09/2016	MUGUMOINI	212	4	-1.326458333	36.78585167	yes	TWAG1926	58	58	NA	0	0	0	0	0	0	0	0	3	0	0	0	0	0	0	0	0	birds	NA	ERS3416293 (SAMEA5612105)
INT007404	Plate 12	P160719	UZ028299	MWK056SUI1	pig	monogastric	livestock	MWK056	03/05/2016	MWIKI	313	6	-1.231583333	36.93017333	yes	INT007404	56	56	NA	0	0	4	0	0	10	0	0	0	0	0	7	0	0	0	0	0	ruminants monogastrics birds	NA	ERS3415342 (SAMEA5611152)
TMP016687	Plate 02	P160078	UZ025455	VIW002BAT2	bat	w_bat	wildlife	VIW002	01/09/2015	VIWANDANI	312	7	-1.309915	36.878755	yes	TMP016687	56	56	NA	0	3	0	0	0	15	3	0	5	0	0	0	0	0	0	0	0	ruminants monogastrics birds	NA	ERS3415758 (SAMEA5611569)
ALQ018577	Plate 08	P160553	UZ026179	KIG019GAL3	chickens	poultry	livestock	KIG019	02/11/2015	KIRIGU	260	6	-1.291726667	36.70118333	yes	ALQ018577	48	48	NA	0	0	16	0	0	2	0	0	5	0	0	0	0	0	0	0	0	ruminants monogastrics birds	NA	ERS3414699 (SAMEA5610509)
ALQ019167	Plate 03	P160305	UZ2004863	KIL042AVN4	avian	w_avian	wildlife	KIL042	09/03/2016	KILIMANI	130	2	-1.297515	36.78249167	yes	ALQ019167	48	48	NA	0	0	6	0	0	0	0	0	6	0	0	0	0	0	0	0	0	ruminants birds	NA	ERS3414730 (SAMEA5610540)
ALQ019429	Plate 03	P160305	UZ026361	KIG019BT_POP4	bat_pop	w_bat	wildlife	KIG019	02/11/2015	KIRIGU	260	6	-1.291726667	36.70118333	yes	ALQ019429	48	48	NA	0	0	16	0	0	2	0	0	5	0	0	0	0	0	0	0	0	ruminants monogastrics birds	NA	ERS3414735 (SAMEA5610545)
ALQ019463	Plate 09	P160554	UZ027539	KIL041LAG2	rabbit	monogastric	livestock	KIL041	08/03/2016	KILIMANI	110	2	-1.291786185	36.78376162	yes	ALQ019463	48	48	NA	0	0	0	3	3	0	33	0	167	0	0	6	3	4	6	0	0	ruminants monogastrics birds	NA	ERS3414736 (SAMEA5610546)
ALQ019832	Plate 04	P160305	UZ026922	UTH029HUM2	human	human	human	UTH029	02/12/2015	UTHIRU	260	6	-1.259986667	36.70342	yes	ALQ019832	48	48	NA	0	0	0	6	0	0	0	0	115	0	0	0	0	0	0	0	0	ruminants birds	NA	ERS3414782 (SAMEA5610592)
ALQ023279	Plate 07	P160553	UZ028838	SPV064OVN2	sheep	ruminant	livestock	SPV064	23/05/2016	SPRING VALLEY	110	2	-1.253818333	36.790205	yes	ALQ023279	48	48	NA	0	1	0	3	5	0	6	0	4	0	0	0	3	0	1	0	0	ruminants monogastrics birds	NA	ERS3414876 (SAMEA5610686)
ALQ023305	Plate 08	P160553	UZ029221	SPV064HUM2	human	human	human	SPV064	23/05/2016	SPRING VALLEY	110	2	-1.253818333	36.790205	yes	ALQ023305	48	48	NA	0	1	0	3	5	0	6	0	4	0	0	0	3	0	1	0	0	ruminants monogastrics birds	NA	ERS3414880 (SAMEA5610690)
ALQ028389	Plate 11	P160719	UZ028829	KOR059SUI3	pig	monogastric	livestock	KOR059	10/05/2016	NYAYO (KOROGOCHO)	312	7	-1.253945	36.88923667	yes	ALQ028389	48	48	NA	0	0	0	0	0	10	0	0	0	0	0	0	0	0	0	0	0	monogastrics	NA	ERS3414907 (SAMEA5610717)
ALQ034761	Plate 18	P160773	UZ030285	EMB087AVN2	avian	w_avian	wildlife	EMB087	24/08/2016	EMBAKASI	211	4	-1.310101667	36.89491333	yes	ALQ034761	48	48	NA	0	0	0	0	0	0	6	0	20	0	0	0	0	0	0	0	0	monogastrics birds	NA	ERS3414957 (SAMEA5610767)
ALQ034823	Plate 18	P160773	UZ035195	EMB087ROD3	rodent	w_mammal	wildlife	EMB087	24/08/2016	EMBAKASI	211	4	-1.310101667	36.89491333	yes	ALQ034823	48	48	NA	0	0	0	0	0	0	6	0	20	0	0	0	0	0	0	0	0	monogastrics birds	NA	ERS3414962 (SAMEA5610772)
INT003297	Plate 09	P160554	UZ027495	KIL041CAP3	goat	ruminant	livestock	KIL041	08/03/2016	KILIMANI	110	2	-1.291786185	36.78376162	yes	INT003297	48	48	NA	0	0	0	3	3	0	33	0	167	0	0	6	3	4	6	0	0	ruminants monogastrics birds	NA	ERS3415021 (SAMEA5610831)
INT003754	Plate 12	P160719	UZ027520	KIL041CAP1	goat	ruminant	livestock	KIL041	08/03/2016	KILIMANI	110	2	-1.291786185	36.78376162	yes	INT003754	48	48	NA	0	0	0	3	3	0	33	0	167	0	0	6	3	4	6	0	0	ruminants monogastrics birds	NA	ERS3415039 (SAMEA5610849)
INT004258	Plate 03	P160305	UZ027015	DAN032GAL3	chickens	poultry	livestock	DAN032	12/01/2016	DANDORA 'B'	313	6	-1.24761043	36.90650254	yes	INT004258	48	48	NA	0	0	0	0	0	0	0	0	53	0	0	0	0	0	0	0	0	birds	NA	ERS3415068 (SAMEA5610878)
INT004479	Plate 06	P160465	UZ2004663	UMJ035ROD1	rodent	w_mammal	wildlife	UMJ035	26/01/2016	UMOJA	212	4	-1.282928333	36.88523333	yes	INT004479	48	48	NA	0	0	0	0	0	0	0	0	15	0	0	0	0	0	0	0	0	birds	NA	ERS3415100 (SAMEA5610910)
INT004513	Plate 06	P160465	UZ027090	UMJ035GAL1	chickens	poultry	livestock	UMJ035	26/01/2016	UMOJA	212	4	-1.282928333	36.88523333	yes	INT004513	48	48	NA	0	0	0	0	0	0	0	0	15	0	0	0	0	0	0	0	0	birds	NA	ERS3415106 (SAMEA5610916)
INT004539	Plate 11	P160719	UZ027130	UMJ036MEL1	turkeys	poultry	livestock	UMJ036	27/01/2016	UMOJA	212	4	-1.278311667	36.88803	yes	INT004539	48	48	NA	0	0	5	0	0	0	28	0	24	0	0	0	0	0	3	0	0	ruminants monogastrics birds	NA	ERS3415110 (SAMEA5610920)
INT004542	Plate 09	P160554	UZ027111	UMJ036GAL1	chickens	poultry	livestock	UMJ036	27/01/2016	UMOJA	212	4	-1.278311667	36.88803	yes	INT004542	48	48	NA	0	0	5	0	0	0	28	0	24	0	0	0	0	0	3	0	0	ruminants monogastrics birds	NA	ERS3415111 (SAMEA5610921)
INT005129	Plate 05	P160465	UZ027676	EAS043GAL4	chickens	poultry	livestock	EAS043	14/03/2016	EASTLEIGH NORTH	330	5	-1.266996667	36.84912833	yes	INT005129	48	48	NA	0	0	0	0	0	0	0	0	8	0	0	0	0	0	0	0	0	birds	NA	ERS3415189 (SAMEA5610999)
INT005135	Plate 05	P160465	UZ027670	EAS043GAL1	chickens	poultry	livestock	EAS043	14/03/2016	EASTLEIGH NORTH	330	5	-1.266996667	36.84912833	yes	INT005135	48	48	NA	0	0	0	0	0	0	0	0	8	0	0	0	0	0	0	0	0	birds	NA	ERS3415190 (SAMEA5611000)
INT005614	Plate 07	P160553	UZ028141	KHW049GAL3	chickens	poultry	livestock	KHW049	05/04/2016	KAHAWA WEST / JUJA K	311	6	-1.179655	36.90618833	yes	INT005614	48	48	NA	0	5	0	0	0	0	0	0	18	0	0	0	0	0	0	0	0	ruminants birds	NA	ERS3415254 (SAMEA5611064)
INT005931	Plate 06	P160465	UZ028282	LUM053GAL4	chickens	poultry	livestock	LUM053	12/04/2016	LUMUMBA (JERICHO)	220	6	-1.292383333	36.87426	yes	INT005931	48	48	NA	0	0	0	0	0	0	0	0	15	0	0	0	0	0	0	0	0	birds	NA	ERS3415295 (SAMEA5611105)
INT005971	Plate 06	P160465	UZ028331	LUM053HUM1	human	human	human	LUM053	12/04/2016	LUMUMBA (JERICHO)	220	6	-1.292383333	36.87426	yes	INT005971	48	48	NA	0	0	0	0	0	0	0	0	15	0	0	0	0	0	0	0	0	birds	NA	ERS3415301 (SAMEA5611111)
INT007369	Plate 09	P160554	UZ028094	MWK056AVN3	avian	w_avian	wildlife	MWK056	03/05/2016	MWIKI	313	6	-1.231583333	36.93017333	yes	INT007369	48	48	NA	0	0	4	0	0	10	0	0	0	0	0	7	0	0	0	0	0	ruminants monogastrics birds	NA	ERS3415336 (SAMEA5611146)
INT007397	Plate 12	P160719	UZ028312	MWK056SUI4	pig	monogastric	livestock	MWK056	03/05/2016	MWIKI	313	6	-1.231583333	36.93017333	yes	INT007397	48	48	NA	0	0	4	0	0	10	0	0	0	0	0	7	0	0	0	0	0	ruminants monogastrics birds	NA	ERS3415341 (SAMEA5611151)
INT007544	Plate 07	P160553	UZ028726	MWK057SUI3	pig	monogastric	livestock	MWK057	05/05/2016	MWIKI	313	6	-1.229788913	36.92984478	yes	INT007544	48	48	NA	0	0	4	0	0	11	0	0	4	0	0	16	0	0	0	0	0	ruminants monogastrics birds	NA	ERS3415363 (SAMEA5611174)
INT007684	Plate 16	P160810	UZ028761	KOR058ANA1	ducks	poultry	livestock	KOR058	09/05/2016	NYAYO (KOROGOCHO)	312	7	-1.25093	36.88799667	yes	INT007684	48	48	NA	0	0	17	0	1	0	0	0	20	0	0	3	0	0	0	0	0	ruminants birds	NA	ERS3415382 (SAMEA5611193)
INT007898	Plate 08	P160553	UZ029166	KAS061SUI5	pig	monogastric	livestock	KAS061	16/05/2016	KASARANI	321	5	-1.223748333	36.92381333	yes	INT007898	48	48	NA	0	0	3	0	0	10	0	0	9	0	0	0	0	0	0	0	0	ruminants monogastrics birds	NA	ERS3415411 (SAMEA5611222)
INT007924	Plate 07	P160553	UZ029157	KAS061GAL1	chickens	poultry	livestock	KAS061	16/05/2016	KASARANI	321	5	-1.223748333	36.92381333	yes	INT007924	48	48	NA	0	0	3	0	0	10	0	0	9	0	0	0	0	0	0	0	0	ruminants monogastrics birds	NA	ERS3415415 (SAMEA5611226)
INT008008	Plate 08	P160553	UZ027621	KAS062HUM2	human	human	human	KAS062	17/05/2016	KASARANI	321	5	-1.21818802	36.9035827	no	INT008008	48	48	NA	0	0	0	0	0	0	0	0	0	0	0	0	0	0	0	0	0	none	NA	ERS3415427 (SAMEA5611238)
INT010007	Plate 17	P160773	UZ035303	SPV100AVN7	avian	w_avian	wildlife	SPV100	05/10/2016	SPRING VALLEY	110	2	-1.254815	36.77469833	yes	INT010007	48	48	NA	0	0	0	0	0	0	4	0	1	0	0	9	4	1	1	70	0	monogastrics birds	NA	ERS3415454 (SAMEA5611265)
INT010057	Plate 16	P160810	UZ030687	SPV100ANA4	ducks	poultry	livestock	SPV100	05/10/2016	SPRING VALLEY	110	2	-1.254815	36.77469833	yes	INT010057	48	48	NA	0	0	0	0	0	0	4	0	1	0	0	9	4	1	1	70	0	monogastrics birds	NA	ERS3415461 (SAMEA5611272)
INT010091	Plate 21	P170066	UZ030675	SPV100ANA5	ducks	poultry	livestock	SPV100	05/10/2016	SPRING VALLEY	110	2	-1.254815	36.77469833	yes	INT010091	48	48	NA	0	0	0	0	0	0	4	0	1	0	0	9	4	1	1	70	0	monogastrics birds	NA	ERS3415467 (SAMEA5611278)
INT010153	Plate 17	P160773	UZ030672	SPV100MEL1	turkeys	poultry	livestock	SPV100	05/10/2016	SPRING VALLEY	110	2	-1.254815	36.77469833	yes	INT010153	48	48	NA	0	0	0	0	0	0	4	0	1	0	0	9	4	1	1	70	0	monogastrics birds	NA	ERS3415477 (SAMEA5611288)
PL015022	Plate 02	P160078	UZ025898	MBO014HUM5	human	human	human	MBO014	12/10/2015	MBOTELA	240	5	-1.298803333	36.86333833	yes	PL015022	48	48	NA	0	0	0	0	0	0	3	3	12	0	0	8	0	3	0	0	0	monogastrics birds	NA	ERS3415480 (SAMEA5611291)
PLQ000534	Plate 21	P170066	UZ035047	NGN079AVN5	avian	w_avian	wildlife	NGN079	08/08/2016	NGUNDU	270	5	-1.268731667	37.06599	yes	PLQ000534	48	48	NA	6	0	0	0	10	0	0	0	3	0	0	0	0	0	0	0	0	ruminants birds other	NA	ERS3415531 (SAMEA5611342)
PLQ000941	Plate 18	P160773	UZ035120	MUT084ROD2	rodent	w_mammal	wildlife	MUT084	17/08/2016	MUTHANGARI	110	2	-1.265065	36.78292	yes	PLQ000941	48	48	NA	0	0	0	2	0	0	0	0	2	0	0	0	0	0	0	0	0	ruminants birds	NA	ERS3415577 (SAMEA5611388)
TMP015856	Plate 21	P170066	UZ025128	VIW001CAP3	goat	ruminant	livestock	VIW001	31/08/2015	VIWANDANI	312	7	-1.313058333	36.85866167	yes	TMP015856	48	48	NA	0	0	0	4	0	0	0	0	200	0	0	0	0	5	0	0	0	ruminants birds	NA	ERS3415686 (SAMEA5611497)
TMP016137	Plate 14	P160720	UZ025347	VIW002AVN4	avian	w_avian	wildlife	VIW002	01/09/2015	VIWANDANI	312	7	-1.309915	36.878755	yes	TMP016137	48	48	NA	0	3	0	0	0	15	3	0	5	0	0	0	0	0	0	0	0	ruminants monogastrics birds	NA	ERS3415700 (SAMEA5611511)
TMP016545	Plate 18	P160773	UZ025297	VIW003BAT1	bat	w_bat	wildlife	VIW003	08/09/2015	VIWANDANI	312	7	-1.300886667	36.88674	no	TMP016545	48	48	NA	0	0	0	0	0	0	0	0	0	0	0	0	0	0	0	0	0	none	NA	ERS3415749 (SAMEA5611560)
TMP018332	Plate 03	P160305	UZ2004613	KYL026AV_POP2	av_pop	w_avian	wildlife	KYL026	24/11/2015	KAYOLE	313	6	-1.276371667	36.920625	yes	TMP018332	48	48	NA	0	0	0	0	0	14	0	0	40	0	0	0	0	0	0	0	0	monogastrics birds	NA	ERS3415796 (SAMEA5611607)
TMP018505	Plate 08	P160553	UZ026660	KYL025CAP7	goat	ruminant	livestock	KYL025	16/11/2015	KAYOLE	313	6	-1.265657435	36.91767563	yes	TMP018505	48	48	NA	0	1	14	0	0	0	0	0	0	0	0	2	0	0	0	0	0	ruminants birds	NA	ERS3415805 (SAMEA5611616)
TMP018953	Plate 14	P160720	UZ026513	MLK024GAL6	chickens	poultry	livestock	MLK024	11/11/2015	MLANGO KUBWA	312	7	-1.26418	36.85309167	yes	TMP018953	48	48	NA	0	0	0	0	0	0	0	0	8	0	0	7	0	0	0	0	0	birds	NA	ERS3415825 (SAMEA5611636)
TMP019171	Plate 04	P160305	UZ026111	MAK018HUM4	human	human	human	MAK018	27/10/2015	MAKONGENI	230	6	-1.296248	36.851973	no	TMP019171	48	48	NA	0	0	0	0	0	0	0	0	0	0	0	0	0	0	0	0	0	none	NA	ERS3415839 (SAMEA5611650)
TMP019236	Plate 15	P160810	UZ2004410	MAK018AVN7	avian	w_avian	wildlife	MAK018	27/10/2015	MAKONGENI	230	6	-1.296248	36.851973	no	TMP019236	48	48	NA	0	0	0	0	0	0	0	0	0	0	0	0	0	0	0	0	0	none	NA	ERS3415849 (SAMEA5611660)
TMP019388	Plate 02	P160078	UZ026184	KIG019GAL1	chickens	poultry	livestock	KIG019	02/11/2015	KIRIGU	260	6	-1.291726667	36.70118333	yes	TMP019388	48	48	NA	0	0	16	0	0	2	0	0	5	0	0	0	0	0	0	0	0	ruminants monogastrics birds	NA	ERS3415868 (SAMEA5611679)
TMP019596	Plate 03	P160305	UZ026275	KIG020GAL2	chickens	poultry	livestock	KIG020	03/11/2015	KIRIGU	260	6	-1.29399	36.704215	yes	TMP019596	48	48	NA	0	3	2	0	0	0	0	0	3	0	0	0	0	0	0	0	0	ruminants birds	NA	ERS3415895 (SAMEA5611706)
TMP019621	Plate 15	P160810	UZ026299	KIG021AVN6	avian	w_avian	wildlife	KIG021	03/11/2015	KIRIGU	260	6	-1.288618333	36.69824333	no	TMP019621	48	48	NA	0	0	0	0	0	0	0	0	0	0	0	0	0	0	0	0	0	none	NA	ERS3415899 (SAMEA5611710)
TMP020715	Plate 10	P160554	UZ021992	KWG071MEL1	turkeys	poultry	livestock	KWG071	05/07/2016	KAWANGWARE	260	6	-1.280645	36.74687667	yes	TMP020715	48	48	NA	0	0	22	0	3	1	2	0	0	0	0	0	3	0	2	0	0	ruminants monogastrics birds	NA	ERS3415985 (SAMEA5611796)
TMP021051	Plate 21	P170066	UZ022050	GTN074AVN3	avian	w_avian	wildlife	GTN074	13/07/2016	GATINA	260	6	-1.291341667	36.75221	yes	TMP021051	48	48	NA	0	0	0	0	3	0	0	0	7	0	0	0	0	0	0	0	0	ruminants birds	NA	ERS3416037 (SAMEA5611848)
TMP021082	Plate 21	P170066	UZ027357	GTN074ROD2	rodent	w_mammal	wildlife	GTN074	13/07/2016	GATINA	260	6	-1.291341667	36.75221	yes	TMP021082	48	48	NA	0	0	0	0	3	0	0	0	7	0	0	0	0	0	0	0	0	ruminants birds	NA	ERS3416042 (SAMEA5611853)
TMP021220	Plate 19	P160812	UZ022105	GWK076SUI6	pig	monogastric	livestock	GWK076	19/07/2016	GATWIKIRA	312	7	-1.31708	36.77864167	yes	TMP021220	48	48	NA	0	0	0	0	0	20	0	0	0	0	16	0	0	0	0	0	0	monogastrics birds	NA	ERS3416061 (SAMEA5611872)
TMP021253	Plate 19	P160812	UZ022337	GWK076SUI5	pig	monogastric	livestock	GWK076	19/07/2016	GATWIKIRA	312	7	-1.31708	36.77864167	yes	TMP021253	48	48	NA	0	0	0	0	0	20	0	0	0	0	16	0	0	0	0	0	0	monogastrics birds	NA	ERS3416066 (SAMEA5611877)
TMP021307	Plate 13	P160720	UZ022302	GWK077HUM1	human	human	human	GWK077	20/07/2016	GATWIKIRA	312	7	-1.314035	36.78263167	no	TMP021307	48	48	NA	0	0	0	0	0	0	0	0	0	0	0	0	0	0	0	0	0	none	NA	ERS3416074 (SAMEA5611885)
TMP021453	Plate 21	P170066	UZ028216	KHW050NUM1	guinea_fowl	poultry	livestock	KHW050	06/04/2016	KAHAWA WEST / JUJA K	311	6	-1.179393235	36.90742073	yes	TMP021453	48	48	NA	0	0	4	11	0	0	0	0	20	0	0	0	14	4	5	0	0	ruminants birds	NA	ERS3416079 (SAMEA5611890)
TMP021563	Plate 11	P160719	UZ028241	LUM053GAL6	chickens	poultry	livestock	LUM053	12/04/2016	LUMUMBA (JERICHO)	220	6	-1.292383333	36.87426	yes	TMP021563	48	48	NA	0	0	0	0	0	0	0	0	15	0	0	0	0	0	0	0	0	birds	NA	ERS3416082 (SAMEA5611893)
TMP021766	Plate 21	P170066	UZ027389	KHW050ROD2	rodent	w_mammal	wildlife	KHW050	06/04/2016	KAHAWA WEST / JUJA K	311	6	-1.179393235	36.90742073	yes	TMP021766	48	48	NA	0	0	4	11	0	0	0	0	20	0	0	0	14	4	5	0	0	ruminants birds	NA	ERS3416098 (SAMEA5611909)
TMP023546	Plate 17	P160773	UZ030200	EMB085GAL2	chickens	poultry	livestock	EMB085	22/08/2016	EMBAKASI	211	4	-1.311076667	36.89346167	yes	TMP023546	48	48	NA	0	0	0	0	0	0	0	0	300	0	0	0	0	0	0	26	0	birds	NA	ERS3416138 (SAMEA5611950)
TMP023917	Plate 19	P160812	UZ030932	MGM096GAL2	chickens	poultry	livestock	MGM096	21/09/2016	MUGUMOINI	212	4	-1.323066667	36.78586333	yes	TMP023917	48	48	NA	0	0	0	0	0	0	0	0	4	0	0	0	0	0	0	0	0	birds	NA	ERS3416159 (SAMEA5611971)
TMP023922	Plate 19	P160812	UZ030926	MGM096GAL4	chickens	poultry	livestock	MGM096	21/09/2016	MUGUMOINI	212	4	-1.323066667	36.78586333	yes	TMP023922	48	48	NA	0	0	0	0	0	0	0	0	4	0	0	0	0	0	0	0	0	birds	NA	ERS3416160 (SAMEA5611972)
TMP024094	Plate 19	P160812	UZ031063	LOR097NUM1	guinea_fowl	poultry	livestock	LOR097	27/09/2016	LORESHO	110	1	-1.247168333	36.764595	yes	TMP024094	48	48	NA	0	0	0	0	0	0	0	0	13	0	0	0	0	16	0	0	0	birds	NA	ERS3416187 (SAMEA5611999)
TMP024272	Plate 17	P160773	UZ030611	LOR099HUM1	human	human	human	LOR099	03/10/2016	LORESHO	120	1	-1.254446667	36.74716167	no	TMP024272	48	48	NA	0	0	0	0	0	0	0	0	0	0	0	0	0	0	0	0	0	none	NA	ERS3416213 (SAMEA5612025)
TMP024453	Plate 18	P160773	UZ031045	LOR097GAL7	chickens	poultry	livestock	LOR097	27/09/2016	LORESHO	110	1	-1.247168333	36.764595	yes	TMP024453	48	48	NA	0	0	0	0	0	0	0	0	13	0	0	0	0	16	0	0	0	birds	NA	ERS3416221 (SAMEA5612033)
TWAG1734	Plate 18	P160773	UZ022197	BOM091ANA2	geese	poultry	livestock	BOM091	13/09/2016	BOMAS	211	3	-1.320306667	36.78094667	yes	TWAG1734	48	48	NA	0	0	0	0	0	0	2	0	15	0	0	0	2	3	2	0	3	monogastrics birds	NA	ERS3416262 (SAMEA5612074)
TWAG1974	Plate 18	P160773	UZ030368	MGM096AVN1	avian	w_avian	wildlife	MGM096	21/09/2016	MUGUMOINI	212	4	-1.323066667	36.78586333	yes	TWAG1974	48	48	NA	0	0	0	0	0	0	0	0	4	0	0	0	0	0	0	0	0	birds	NA	ERS3416301 (SAMEA5612113)
INT000407	Plate 01	P160078	UZ025578	MSA005HUM3	human	human	human	MSA005	16/09/2015	MOWLEM = SAIKA	311	6	-1.253531667	36.92563333	no	INT000407	46	46	NA	0	0	0	0	0	0	0	0	0	0	0	0	0	0	0	0	0	none	NA	ERS3414997 (SAMEA5610807)
INT005058	Plate 10	P160554	UZ027352	KIL042ROD1	rodent	w_mammal	wildlife	KIL042	09/03/2016	KILIMANI	130	2	-1.297515	36.78249167	yes	INT005058	46	46	NA	0	0	6	0	0	0	0	0	6	0	0	0	0	0	0	0	0	ruminants birds	NA	ERS3415181 (SAMEA5610991)
INT005518	Plate 05	P160465	UZ2004912	KHW051AVN4	avian	w_avian	wildlife	KHW051	04/04/2016	KAHAWA WEST / JUJA K	311	6	-1.180833333	36.91151833	no	INT005518	46	46	NA	0	0	0	0	0	0	0	0	0	0	0	0	0	0	0	0	0	none	NA	ERS3415239 (SAMEA5611049)
INT009971	Plate 15	P160810	UZ031106	SPV100HUM1	human	human	human	SPV100	05/10/2016	SPRING VALLEY	110	2	-1.254815	36.77469833	yes	INT009971	46	46	NA	0	0	0	0	0	0	4	0	1	0	0	9	4	1	1	70	0	monogastrics birds	NA	ERS3415451 (SAMEA5611262)
TMP021274	Plate 21	P170066	UZ035011	GWK076AVN6	avian	w_avian	wildlife	GWK076	19/07/2016	GATWIKIRA	312	7	-1.31708	36.77864167	yes	TMP021274	46	46	NA	0	0	0	0	0	20	0	0	0	0	16	0	0	0	0	0	0	monogastrics birds	NA	ERS3416070 (SAMEA5611881)
ALQ034881	Plate 11	P160719	UZ022214	KTS088HUM9	human	human	human	KTS088	05/09/2016	KITISURU	110	1	-1.232017083	36.75897979	yes	ALQ034881	43	43	NA	0	4	0	0	0	0	0	0	7	5	0	6	7	0	0	0	0	ruminants birds	NA	ERS3414971 (SAMEA5610781)
ALQ018583	Plate 04	P160305	UZ026144	KIG019CAP2	goat	ruminant	livestock	KIG019	02/11/2015	KIRIGU	260	6	-1.291726667	36.70118333	yes	ALQ018583	40	40	NA	0	0	16	0	0	2	0	0	5	0	0	0	0	0	0	0	0	ruminants monogastrics birds	NA	ERS3414700 (SAMEA5610510)
ALQ020200	Plate 04	P160305	UZ026914	UTH029HUM1	human	human	human	UTH029	02/12/2015	UTHIRU	260	6	-1.259986667	36.70342	yes	ALQ020200	40	40	NA	0	0	0	6	0	0	0	0	115	0	0	0	0	0	0	0	0	ruminants birds	NA	ERS3414834 (SAMEA5610644)
ALQ020433	Plate 03	P160305	UZ026844	UTH030HUM3	human	human	human	UTH030	01/12/2015	UTHIRU	260	6	-1.26573424	36.70066436	no	ALQ020433	40	40	NA	0	0	0	0	0	0	0	0	0	0	0	0	0	0	0	0	0	none	NA	ERS3414845 (SAMEA5610655)
INT007797	Plate 07	P160553	UZ028910	KOR060HUM5	human	human	human	KOR060	11/05/2016	NYAYO (KOROGOCHO)	312	7	-1.251918333	36.89265167	no	INT007797	40	40	NA	0	0	0	0	0	0	0	0	0	0	0	0	0	0	0	0	0	none	NA	ERS3415397 (SAMEA5611208)
PLQ000536	Plate 14	P160720	UZ022126	NGN079OVN1	sheep	ruminant	livestock	NGN079	08/08/2016	NGUNDU	270	5	-1.268731667	37.06599	yes	PLQ000536	40	40	NA	6	0	0	0	10	0	0	0	3	0	0	0	0	0	0	0	0	ruminants birds other	NA	ERS3415532 (SAMEA5611343)
ALQ032635	Plate 14	P160720	UZ030090	NGN081HUM1	human	human	human	NGN081	10/08/2016	NGUNDU	270	5	-1.28238895	37.03896603	no	ALQ032635	38	38	NA	0	0	0	0	0	0	0	0	0	0	0	0	0	0	0	0	0	none	NA	ERS3414920 (SAMEA5610730)
INT004362	Plate 05	P160465	UZ2004757	DAN033AVN4	avian	w_avian	wildlife	DAN033	13/01/2016	DANDORA 'B'	313	6	-1.241171667	36.910715	no	INT004362	38	38	NA	0	0	0	0	0	0	0	0	0	0	0	0	0	0	0	0	0	none	NA	ERS3415083 (SAMEA5610893)
TMP021131	Plate 14	P160720	UZ022282	GTN075HUM1	human	human	human	GTN075	13/07/2016	GATINA	260	6	-1.275552495	36.75860432	no	TMP021131	38	38	NA	0	0	0	0	0	0	0	0	0	0	0	0	0	0	0	0	0	none	NA	ERS3416048 (SAMEA5611859)
TMP024043	Plate 19	P160812	UZ030955	LOR097HUM10	human	human	human	LOR097	27/09/2016	LORESHO	110	1	-1.247168333	36.764595	yes	TMP024043	38	38	NA	0	0	0	0	0	0	0	0	13	0	0	0	0	16	0	0	0	birds	NA	ERS3416180 (SAMEA5611992)
ALQ019604	Plate 04	P160305	UZ026638	KYL025HUM9	human	human	human	KYL025	16/11/2015	KAYOLE	313	6	-1.265657435	36.91767563	yes	ALQ019604	34	34	NA	0	1	14	0	0	0	0	0	0	0	0	2	0	0	0	0	0	ruminants birds	NA	ERS3414755 (SAMEA5610565)
INT005950	Plate 06	P160465	UZ028332	LUM053HUM4	human	human	human	LUM053	12/04/2016	LUMUMBA (JERICHO)	220	6	-1.292383333	36.87426	yes	INT005950	34	34	NA	0	0	0	0	0	0	0	0	15	0	0	0	0	0	0	0	0	birds	NA	ERS3415298 (SAMEA5611108)
INT007803	Plate 08	P160553	UZ028909	KOR060HUM4	human	human	human	KOR060	11/05/2016	NYAYO (KOROGOCHO)	312	7	-1.251918333	36.89265167	no	INT007803	34	34	NA	0	0	0	0	0	0	0	0	0	0	0	0	0	0	0	0	0	none	NA	ERS3415398 (SAMEA5611209)
PL015154	Plate 02	P160078	UZ025930	MBO015HUM3	human	human	human	MBO015	13/10/2015	MBOTELA	240	5	-1.29833	36.85970667	no	PL015154	34	34	NA	0	0	0	0	0	0	0	0	0	0	0	0	0	0	0	0	0	none	NA	ERS3415500 (SAMEA5611311)
PL015041	Plate 01	P160078	UZ025906	MBO013CAP1	goat	ruminant	livestock	MBO013	13/10/2015	MBOTELA	240	5	-1.298876667	36.86243	yes	PL015041	33	33	NA	0	0	7	0	0	0	0	0	0	0	0	0	0	0	0	0	0	ruminants	NA	ERS3415483 (SAMEA5611294)
TMP019102	Plate 01	P160078	UZ026087	MAK017LAG1	rabbit	monogastric	livestock	MAK017	27/10/2015	MAKONGENI	230	6	-1.298248333	36.84727333	yes	TMP019102	28	28	NA	0	0	0	0	0	0	5	1	30	0	0	0	0	0	0	0	0	monogastrics birds	NA	ERS3415832 (SAMEA5611643)
ALQ019710	Plate 11	P160719	UZ026566	KYL027HUM2	human	human	human	KYL027	17/11/2015	KAYOLE	313	6	-1.273571667	36.91366667	no	ALQ019710	23	23	NA	0	0	0	0	0	0	0	0	0	0	0	0	0	0	0	0	0	none	NA	ERS3414768 (SAMEA5610578)
ALQ020141	Plate 21	P170066	UZ026837	UTH030HUM5	human	human	human	UTH030	01/12/2015	UTHIRU	260	6	-1.26573424	36.70066436	no	ALQ020141	23	23	NA	0	0	0	0	0	0	0	0	0	0	0	0	0	0	0	0	0	none	NA	ERS3414825 (SAMEA5610635)
ALQ020449	Plate 03	P160305	UZ026894	UTH029GAL1	chickens	poultry	livestock	UTH029	02/12/2015	UTHIRU	260	6	-1.259986667	36.70342	yes	ALQ020449	23	23	NA	0	0	0	6	0	0	0	0	115	0	0	0	0	0	0	0	0	ruminants birds	NA	ERS3414848 (SAMEA5610658)
PLQ000675	Plate 14	P160720	UZ022154	NGN080CAP1	goat	ruminant	livestock	NGN080	09/08/2016	NGUNDU	270	5	-1.27306	37.05743667	yes	PLQ000675	23	23	NA	0	0	4	0	3	0	0	0	115	0	0	4	0	0	0	0	0	ruminants birds	NA	ERS3415554 (SAMEA5611365)
TMP015108	Plate 03	P160305	UZ025545	MSA004LAG3	rabbit	monogastric	livestock	MSA004	14/09/2015	MOWLEM = SAIKA	311	6	-1.245281667	36.92033333	yes	TMP015108	23	23	NA	0	5	0	0	0	7	4	0	20	0	0	0	0	0	0	0	0	ruminants monogastrics birds other	NA	ERS3415647 (SAMEA5611458)
INT007450	Plate 08	P160553	UZ028597	MWK056HUM3	human	human	human	MWK056	03/05/2016	MWIKI	313	6	-1.231583333	36.93017333	yes	INT007450	17	17	NA	0	0	4	0	0	10	0	0	0	0	0	7	0	0	0	0	0	ruminants monogastrics birds	NA	ERS3415350 (SAMEA5611160)
ALQ018557	Plate 08	P160553	UZ026132	KIG019CAP6	goat	ruminant	livestock	KIG019	02/11/2015	KIRIGU	260	6	-1.291726667	36.70118333	yes	ALQ018557	13	13	NA	0	0	16	0	0	2	0	0	5	0	0	0	0	0	0	0	0	ruminants monogastrics birds	NA	ERS3414698 (SAMEA5610508)
ALQ019947	Plate 04	P160305	UZ026586	KYL026SUI3	pig	monogastric	livestock	KYL026	24/11/2015	KAYOLE	313	6	-1.276371667	36.920625	yes	ALQ019947	13	13	NA	0	0	0	0	0	14	0	0	40	0	0	0	0	0	0	0	0	monogastrics birds	NA	ERS3414799 (SAMEA5610609)
PLQ000670	Plate 16	P160810	UZ022171	NGN080CAP2	goat	ruminant	livestock	NGN080	09/08/2016	NGUNDU	270	5	-1.27306	37.05743667	yes	PLQ000670	13	13	NA	0	0	4	0	3	0	0	0	115	0	0	4	0	0	0	0	0	ruminants birds	NA	ERS3415553 (SAMEA5611364)
TMP019736	Plate 01	P160078	UZ026385	MLK022HUM1	human	human	human	MLK022	09/11/2015	MLANGO KUBWA	312	7	-1.265345	36.85309833	no	TMP019736	13	13	NA	0	0	0	0	0	0	0	0	0	0	0	0	0	0	0	0	0	none	NA	ERS3415908 (SAMEA5611719)
TMP020313	Plate 07	P160553	UZ029247	SPV065HUM1	human	human	human	SPV065	06/06/2016	SPRING VALLEY	120	2	-1.257883333	36.78655833	no	TMP020313	13	13	NA	0	0	0	0	0	0	0	0	0	0	0	0	0	0	0	0	0	none	NA	ERS3415956 (SAMEA5611767)
TWAG2004	Plate 17	P160773	UZ030904	MGM095HUM2	human	human	human	MGM095	20/09/2016	MUGUMOINI	212	4	-1.32085454	36.7856738	no	TWAG2004	12	12	NA	0	0	0	0	0	0	0	0	0	0	0	0	0	0	0	0	0	none	NA	ERS3416306 (SAMEA5612118)
ALQ018899	Plate 04	P160305	UZ025858	MAK016GAL6	chickens	poultry	livestock	MAK016	26/10/2015	MAKONGENI	230	6	-1.29896	36.84870833	yes	ALQ018899	10	10	NA	0	0	0	0	0	0	0	0	11	0	0	0	0	0	0	0	0	birds	NA	ERS3414714 (SAMEA5610524)
ALQ019471	Plate 01	P160078	UZ026520	MLK024GAL2	chickens	poultry	livestock	MLK024	11/11/2015	MLANGO KUBWA	312	7	-1.26418	36.85309167	yes	ALQ019471	10	10	NA	0	0	0	0	0	0	0	0	8	0	0	7	0	0	0	0	0	birds	NA	ERS3414737 (SAMEA5610547)
ALQ019596	Plate 03	P160305	UZ026639	KYL025HUM8	human	human	human	KYL025	16/11/2015	KAYOLE	313	6	-1.265657435	36.91767563	yes	ALQ019596	10	10	NA	0	1	14	0	0	0	0	0	0	0	0	2	0	0	0	0	0	ruminants birds	NA	ERS3414754 (SAMEA5610564)
ALQ019851	Plate 04	P160305	UZ026773	KYL026GAL2	chickens	poultry	livestock	KYL026	24/11/2015	KAYOLE	313	6	-1.276371667	36.920625	yes	ALQ019851	10	10	NA	0	0	0	0	0	14	0	0	40	0	0	0	0	0	0	0	0	monogastrics birds	NA	ERS3414786 (SAMEA5610596)
ALQ019911	Plate 03	P160305	UZ026791	KYL026HUM2	human	human	human	KYL026	24/11/2015	KAYOLE	313	6	-1.276371667	36.920625	yes	ALQ019911	10	10	NA	0	0	0	0	0	14	0	0	40	0	0	0	0	0	0	0	0	monogastrics birds	NA	ERS3414794 (SAMEA5610604)
ALQ019971	Plate 12	P160719	UZ2004597	KYL026AV_POP4	av_pop	w_avian	wildlife	KYL026	24/11/2015	KAYOLE	313	6	-1.276371667	36.920625	yes	ALQ019971	10	10	NA	0	0	0	0	0	14	0	0	40	0	0	0	0	0	0	0	0	monogastrics birds	NA	ERS3414802 (SAMEA5610612)
ALQ019980	Plate 04	P160305	UZ026806	UTH028HUM1	human	human	human	UTH028	30/11/2015	UTHIRU	260	6	-1.263931667	36.70259	yes	ALQ019980	10	10	NA	0	7	0	0	0	0	0	0	0	0	0	0	0	0	0	0	0	ruminants	NA	ERS3414803 (SAMEA5610613)
ALQ020013	Plate 11	P160719	UZ026829	UTH028HUM7	human	human	human	UTH028	30/11/2015	UTHIRU	260	6	-1.263931667	36.70259	yes	ALQ020013	10	10	NA	0	7	0	0	0	0	0	0	0	0	0	0	0	0	0	0	0	ruminants	NA	ERS3414808 (SAMEA5610618)
ALQ020022	Plate 04	P160305	UZ026818	UTH028HUM3	human	human	human	UTH028	30/11/2015	UTHIRU	260	6	-1.263931667	36.70259	yes	ALQ020022	10	10	NA	0	7	0	0	0	0	0	0	0	0	0	0	0	0	0	0	0	ruminants	NA	ERS3414809 (SAMEA5610619)
ALQ020028	Plate 03	P160305	UZ026824	UTH028HUM5	human	human	human	UTH028	30/11/2015	UTHIRU	260	6	-1.263931667	36.70259	yes	ALQ020028	10	10	NA	0	7	0	0	0	0	0	0	0	0	0	0	0	0	0	0	0	ruminants	NA	ERS3414810 (SAMEA5610620)
ALQ020221	Plate 04	P160305	UZ026872	UTH029CAP4	goat	ruminant	livestock	UTH029	02/12/2015	UTHIRU	260	6	-1.259986667	36.70342	yes	ALQ020221	10	10	NA	0	0	0	6	0	0	0	0	115	0	0	0	0	0	0	0	0	ruminants birds	NA	ERS3414838 (SAMEA5610648)
ALQ020467	Plate 05	P160465	UZ026726	MAKBATBT_POP4	bat_pop	w_bat	wildlife	MAKBAT	NA	NA	NA	NA	NA	NA	NA	ALQ020467	10	10	NA	NA	NA	NA	NA	NA	NA	NA	NA	NA	NA	NA	NA	NA	NA	NA	NA	NA	NA	NA	ERS3414851 (SAMEA5610661)
ALQ023267	Plate 08	P160553	UZ029180	SPV064HUM1	human	human	human	SPV064	23/05/2016	SPRING VALLEY	110	2	-1.253818333	36.790205	yes	ALQ023267	10	10	NA	0	1	0	3	5	0	6	0	4	0	0	0	3	0	1	0	0	ruminants monogastrics birds	NA	ERS3414875 (SAMEA5610685)
ALQ023350	Plate 07	P160553	UZ027364	SPV064ROD2	rodent	w_mammal	wildlife	SPV064	23/05/2016	SPRING VALLEY	110	2	-1.253818333	36.790205	yes	ALQ023350	10	10	NA	0	1	0	3	5	0	6	0	4	0	0	0	3	0	1	0	0	ruminants monogastrics birds	NA	ERS3414886 (SAMEA5610696)
ALQ028998	Plate 11	P160719	UZ028733	MWK057SUI2	pig	monogastric	livestock	MWK057	05/05/2016	MWIKI	313	6	-1.229788913	36.92984478	yes	ALQ028998	10	10	NA	0	0	4	0	0	11	0	0	4	0	0	16	0	0	0	0	0	ruminants monogastrics birds	NA	ERS3414917 (SAMEA5610727)
ALQ032642	Plate 14	P160720	UZ030125	MUT082HUM3	human	human	human	MUT082	15/08/2016	MUTHANGARI	110	2	-1.2663	36.782315	yes	ALQ032642	10	10	NA	0	2	0	1	0	0	3	0	13	0	0	0	0	0	0	0	0	ruminants monogastrics birds	NA	ERS3414922 (SAMEA5610732)
ALQ034651	Plate 17	P160773	UZ030180	EMB085COL4	pigeons	poultry	livestock	EMB085	22/08/2016	EMBAKASI	211	4	-1.311076667	36.89346167	yes	ALQ034651	10	10	NA	0	0	0	0	0	0	0	0	300	0	0	0	0	0	0	26	0	birds	NA	ERS3414947 (SAMEA5610757)
ALQ034735	Plate 17	P160773	UZ030433	EMB086HUM1	human	human	human	EMB086	23/08/2016	EMBAKASI	211	4	-1.310175	36.89392833	no	ALQ034735	10	10	NA	0	0	0	0	0	0	0	0	0	0	0	0	0	0	0	0	0	none	NA	ERS3414955 (SAMEA5610765)
ALQ035128	Plate 21	P170066	UZ031083	LOR098LAG2	rabbit	monogastric	livestock	LOR098	28/09/2016	LORESHO	120	1	-1.24741938	36.7508106	yes	ALQ035128	10	10	NA	0	0	3	0	1	0	0	0	21	14	0	2	0	0	0	0	0	ruminants birds	NA	ERS3414982 (SAMEA5610792)
INT000445	Plate 02	P160078	UZ025649	KAN008GAL2	chickens	poultry	livestock	KAN008	22/09/2015	KAREN	110	1	-1.338961667	36.70231333	yes	INT000445	10	10	NA	0	0	0	0	0	0	0	0	140	0	0	0	0	0	0	0	0	birds	NA	ERS3415000 (SAMEA5610810)
INT003649	Plate 12	P160719	UZ027109	UMJ036GAL6	chickens	poultry	livestock	UMJ036	27/01/2016	UMOJA	212	4	-1.278311667	36.88803	yes	INT003649	10	10	NA	0	0	5	0	0	0	28	0	24	0	0	0	0	0	3	0	0	ruminants monogastrics birds	NA	ERS3415035 (SAMEA5610845)
INT003900	Plate 04	P160305	UZ026984	DAN032HUM3	human	human	human	DAN032	12/01/2016	DANDORA 'B'	313	6	-1.24761043	36.90650254	yes	INT003900	10	10	NA	0	0	0	0	0	0	0	0	53	0	0	0	0	0	0	0	0	birds	NA	ERS3415048 (SAMEA5610858)
INT003916	Plate 12	P160719	UZ027009	DAN032GAL7	chickens	poultry	livestock	DAN032	12/01/2016	DANDORA 'B'	313	6	-1.24761043	36.90650254	yes	INT003916	10	10	NA	0	0	0	0	0	0	0	0	53	0	0	0	0	0	0	0	0	birds	NA	ERS3415049 (SAMEA5610859)
INT003929	Plate 12	P160719	UZ026989	DAN032GAL10	chickens	poultry	livestock	DAN032	12/01/2016	DANDORA 'B'	313	6	-1.24761043	36.90650254	yes	INT003929	10	10	NA	0	0	0	0	0	0	0	0	53	0	0	0	0	0	0	0	0	birds	NA	ERS3415051 (SAMEA5610861)
INT004245	Plate 04	P160305	UZ027020	DAN032HUM1	human	human	human	DAN032	12/01/2016	DANDORA 'B'	313	6	-1.24761043	36.90650254	yes	INT004245	10	10	NA	0	0	0	0	0	0	0	0	53	0	0	0	0	0	0	0	0	birds	NA	ERS3415066 (SAMEA5610876)
INT004250	Plate 04	P160305	UZ026986	DAN032HUM2	human	human	human	DAN032	12/01/2016	DANDORA 'B'	313	6	-1.24761043	36.90650254	yes	INT004250	10	10	NA	0	0	0	0	0	0	0	0	53	0	0	0	0	0	0	0	0	birds	NA	ERS3415067 (SAMEA5610877)
INT004352	Plate 05	P160465	UZ026946	DAN031BOV6	bovine	ruminant	livestock	DAN031	11/01/2016	DANDORA 'B'	313	6	-1.241636667	36.90821167	yes	INT004352	10	10	NA	0	9	0	0	0	0	0	0	13	0	0	0	0	0	0	0	0	ruminants birds	NA	ERS3415081 (SAMEA5610891)
INT004357	Plate 05	P160465	UZ2004766	DAN032AVN2	avian	w_avian	wildlife	DAN032	12/01/2016	DANDORA 'B'	313	6	-1.24761043	36.90650254	yes	INT004357	10	10	NA	0	0	0	0	0	0	0	0	53	0	0	0	0	0	0	0	0	birds	NA	ERS3415082 (SAMEA5610892)
INT004755	Plate 09	P160554	UZ027194	KRR038HUM3	human	human	human	KRR038	15/02/2016	KARURA	120	2	-1.216581667	36.79006167	no	INT004755	10	10	NA	0	0	0	0	0	0	0	0	0	0	0	0	0	0	0	0	0	none	NA	ERS3415139 (SAMEA5610949)
INT005037	Plate 06	P160465	UZ027561	KIL042CAP2	goat	ruminant	livestock	KIL042	09/03/2016	KILIMANI	130	2	-1.297515	36.78249167	yes	INT005037	10	10	NA	0	0	6	0	0	0	0	0	6	0	0	0	0	0	0	0	0	ruminants birds	NA	ERS3415178 (SAMEA5610988)
INT005559	Plate 06	P160465	UZ027984	KHW049HUM1	human	human	human	KHW049	05/04/2016	KAHAWA WEST / JUJA K	311	6	-1.179655	36.90618833	yes	INT005559	10	10	NA	0	5	0	0	0	0	0	0	18	0	0	0	0	0	0	0	0	ruminants birds	NA	ERS3415245 (SAMEA5611055)
INT005638	Plate 10	P160554	UZ027392	KHW050ROD3	rodent	w_mammal	wildlife	KHW050	06/04/2016	KAHAWA WEST / JUJA K	311	6	-1.179393235	36.90742073	yes	INT005638	10	10	NA	0	0	4	11	0	0	0	0	20	0	0	0	14	4	5	0	0	ruminants birds	NA	ERS3415257 (SAMEA5611067)
INT005668	Plate 06	P160465	UZ028155	KHW049BOV1	bovine	ruminant	livestock	KHW049	05/04/2016	KAHAWA WEST / JUJA K	311	6	-1.179655	36.90618833	yes	INT005668	10	10	NA	0	5	0	0	0	0	0	0	18	0	0	0	0	0	0	0	0	ruminants birds	NA	ERS3415261 (SAMEA5611071)
INT005734	Plate 21	P170066	UZ027402	KHW050AVN1	avian	w_avian	wildlife	KHW050	06/04/2016	KAHAWA WEST / JUJA K	311	6	-1.179393235	36.90742073	yes	INT005734	10	10	NA	0	0	4	11	0	0	0	0	20	0	0	0	14	4	5	0	0	ruminants birds	NA	ERS3415270 (SAMEA5611080)
INT005765	Plate 06	P160465	UZ028234	KHW050MEL1	turkeys	poultry	livestock	KHW050	06/04/2016	KAHAWA WEST / JUJA K	311	6	-1.179393235	36.90742073	yes	INT005765	10	10	NA	0	0	4	11	0	0	0	0	20	0	0	0	14	4	5	0	0	ruminants birds	NA	ERS3415274 (SAMEA5611084)
INT005822	Plate 10	P160554	UZ027403	KHW050AVN7	avian	w_avian	wildlife	KHW050	06/04/2016	KAHAWA WEST / JUJA K	311	6	-1.179393235	36.90742073	yes	INT005822	10	10	NA	0	0	4	11	0	0	0	0	20	0	0	0	14	4	5	0	0	ruminants birds	NA	ERS3415281 (SAMEA5611091)
INT005872	Plate 21	P170066	UZ028267	LUM052HUM3	human	human	human	LUM052	11/04/2016	LUMUMBA (JERICHO)	220	6	-1.291	36.868835	no	INT005872	10	10	NA	0	0	0	0	0	0	0	0	0	0	0	0	0	0	0	0	0	none	NA	ERS3415286 (SAMEA5611096)
INT005910	Plate 10	P160554	UZ027341	LUM052ROD1	rodent	w_mammal	wildlife	LUM052	11/04/2016	LUMUMBA (JERICHO)	220	6	-1.291	36.868835	no	INT005910	10	10	NA	0	0	0	0	0	0	0	0	0	0	0	0	0	0	0	0	0	none	NA	ERS3415291 (SAMEA5611101)
INT007479	Plate 12	P160719	UZ028296	MWK056SUI3	pig	monogastric	livestock	MWK056	03/05/2016	MWIKI	313	6	-1.231583333	36.93017333	yes	INT007479	10	10	NA	0	0	4	0	0	10	0	0	0	0	0	7	0	0	0	0	0	ruminants monogastrics birds	NA	ERS3415354 (SAMEA5611164)
INT007604	Plate 08	P160553	UZ028713	MWK057AVN12	avian	w_avian	wildlife	MWK057	05/05/2016	MWIKI	313	6	-1.229788913	36.92984478	yes	INT007604	10	10	NA	0	0	4	0	0	11	0	0	4	0	0	16	0	0	0	0	0	ruminants monogastrics birds	NA	ERS3415373 (SAMEA5611184)
INT007744	Plate 07	P160553	UZ028839	KOR059SUI2	pig	monogastric	livestock	KOR059	10/05/2016	NYAYO (KOROGOCHO)	312	7	-1.253945	36.88923667	yes	INT007744	10	10	NA	0	0	0	0	0	10	0	0	0	0	0	0	0	0	0	0	0	monogastrics	NA	ERS3415390 (SAMEA5611201)
INT007810	Plate 08	P160553	UZ028911	KOR060HUM2	human	human	human	KOR060	11/05/2016	NYAYO (KOROGOCHO)	312	7	-1.251918333	36.89265167	no	INT007810	10	10	NA	0	0	0	0	0	0	0	0	0	0	0	0	0	0	0	0	0	none	NA	ERS3415399 (SAMEA5611210)
INT007905	Plate 07	P160553	UZ029149	KAS061SUI6	pig	monogastric	livestock	KAS061	16/05/2016	KASARANI	321	5	-1.223748333	36.92381333	yes	INT007905	10	10	NA	0	0	3	0	0	10	0	0	9	0	0	0	0	0	0	0	0	ruminants monogastrics birds	NA	ERS3415412 (SAMEA5611223)
INT007994	Plate 08	P160553	UZ029171	KAS062HUM1	human	human	human	KAS062	17/05/2016	KASARANI	321	5	-1.21818802	36.9035827	no	INT007994	10	10	NA	0	0	0	0	0	0	0	0	0	0	0	0	0	0	0	0	0	none	NA	ERS3415425 (SAMEA5611236)
INT008356	Plate 14	P160720	UZ022331	GTN074GAL4	chickens	poultry	livestock	GTN074	13/07/2016	GATINA	260	6	-1.291341667	36.75221	yes	INT008356	10	10	NA	0	0	0	0	3	0	0	0	7	0	0	0	0	0	0	0	0	ruminants birds	NA	ERS3415431 (SAMEA5611242)
INT010013	Plate 17	P160773	UZ035294	SPV100AVN2	avian	w_avian	wildlife	SPV100	05/10/2016	SPRING VALLEY	110	2	-1.254815	36.77469833	yes	INT010013	10	10	NA	0	0	0	0	0	0	4	0	1	0	0	9	4	1	1	70	0	monogastrics birds	NA	ERS3415455 (SAMEA5611266)
INT010069	Plate 18	P160773	UZ030701	SPV100ANA6	ducks	poultry	livestock	SPV100	05/10/2016	SPRING VALLEY	110	2	-1.254815	36.77469833	yes	INT010069	10	10	NA	0	0	0	0	0	0	4	0	1	0	0	9	4	1	1	70	0	monogastrics birds	NA	ERS3415463 (SAMEA5611274)
PLQ000515	Plate 16	P160810	UZ022309	NGN079HUM2	human	human	human	NGN079	08/08/2016	NGUNDU	270	5	-1.268731667	37.06599	yes	PLQ000515	10	10	NA	6	0	0	0	10	0	0	0	3	0	0	0	0	0	0	0	0	ruminants birds other	NA	ERS3415528 (SAMEA5611339)
PLQ000652	Plate 16	P160810	UZ022169	NGN080OVN2	sheep	ruminant	livestock	NGN080	09/08/2016	NGUNDU	270	5	-1.27306	37.05743667	yes	PLQ000652	10	10	NA	0	0	4	0	3	0	0	0	115	0	0	4	0	0	0	0	0	ruminants birds	NA	ERS3415550 (SAMEA5611361)
PLQ000742	Plate 18	P160773	UZ035183	NGN079ROD1	rodent	w_mammal	wildlife	NGN079	08/08/2016	NGUNDU	270	5	-1.268731667	37.06599	yes	PLQ000742	10	10	NA	6	0	0	0	10	0	0	0	3	0	0	0	0	0	0	0	0	ruminants birds other	NA	ERS3415565 (SAMEA5611376)
PLQ000890	Plate 17	P160773	UZ035180	MUT084ROD1	rodent	w_mammal	wildlife	MUT084	17/08/2016	MUTHANGARI	110	2	-1.265065	36.78292	yes	PLQ000890	10	10	NA	0	0	0	2	0	0	0	0	2	0	0	0	0	0	0	0	0	ruminants birds	NA	ERS3415573 (SAMEA5611384)
PLQ2222	Plate 16	P160810	UZ030731	KTS088HUM1	human	human	human	KTS088	05/09/2016	KITISURU	110	1	-1.232017083	36.75897979	yes	PLQ2222	10	10	NA	0	4	0	0	0	0	0	0	7	5	0	6	7	0	0	0	0	ruminants birds	NA	ERS3415598 (SAMEA5611409)
PLQ2229	Plate 16	P160810	UZ030497	KTS088BOV2	bovine	ruminant	livestock	KTS088	05/09/2016	KITISURU	110	1	-1.232017083	36.75897979	yes	PLQ2229	10	10	NA	0	4	0	0	0	0	0	0	7	5	0	6	7	0	0	0	0	ruminants birds	NA	ERS3415599 (SAMEA5611410)
PLQ2252	Plate 15	P160810	UZ030516	KTS088GAL4	chickens	poultry	livestock	KTS088	05/09/2016	KITISURU	110	1	-1.232017083	36.75897979	yes	PLQ2252	10	10	NA	0	4	0	0	0	0	0	0	7	5	0	6	7	0	0	0	0	ruminants birds	NA	ERS3415603 (SAMEA5611414)
PLQ2281	Plate 15	P160810	UZ030571	KTS088BOV1	bovine	ruminant	livestock	KTS088	05/09/2016	KITISURU	110	1	-1.232017083	36.75897979	yes	PLQ2281	10	10	NA	0	4	0	0	0	0	0	0	7	5	0	6	7	0	0	0	0	ruminants birds	NA	ERS3415607 (SAMEA5611418)
PLQ2415	Plate 15	P160810	UZ030650	KTS089HUM7	human	human	human	KTS089	06/09/2016	KITISURU	110	1	-1.237836407	36.75603901	yes	PLQ2415	10	10	NA	0	0	0	0	0	0	0	0	0	7	0	0	0	0	0	0	0	birds	NA	ERS3415619 (SAMEA5611430)
PLQ2423	Plate 15	P160810	UZ030796	KTS089HUM12	human	human	human	KTS089	06/09/2016	KITISURU	110	1	-1.237836407	36.75603901	yes	PLQ2423	10	10	NA	0	0	0	0	0	0	0	0	0	7	0	0	0	0	0	0	0	birds	NA	ERS3415620 (SAMEA5611431)
TMP015147	Plate 14	P160720	UZ025406	MSA004AVN3	avian	w_avian	wildlife	MSA004	14/09/2015	MOWLEM = SAIKA	311	6	-1.245281667	36.92033333	yes	TMP015147	10	10	NA	0	5	0	0	0	7	4	0	20	0	0	0	0	0	0	0	0	ruminants monogastrics birds other	NA	ERS3415650 (SAMEA5611461)
TMP015158	Plate 15	P160810	UZ025253	MSA004BOV4	bovine	ruminant	livestock	MSA004	14/09/2015	MOWLEM = SAIKA	311	6	-1.245281667	36.92033333	yes	TMP015158	10	10	NA	0	5	0	0	0	7	4	0	20	0	0	0	0	0	0	0	0	ruminants monogastrics birds other	NA	ERS3415651 (SAMEA5611462)
TMP015796	Plate 01	P160078	UZ025117	VIW001HUM1	human	human	human	VIW001	31/08/2015	VIWANDANI	312	7	-1.313058333	36.85866167	yes	TMP015796	10	10	NA	0	0	0	4	0	0	0	0	200	0	0	0	0	5	0	0	0	ruminants birds	NA	ERS3415681 (SAMEA5611492)
TMP016034	Plate 01	P160078	UZ025303	MSA005ROD1	rodent	w_mammal	wildlife	MSA005	16/09/2015	MOWLEM = SAIKA	311	6	-1.253531667	36.92563333	no	TMP016034	10	10	NA	0	0	0	0	0	0	0	0	0	0	0	0	0	0	0	0	0	none	NA	ERS3415692 (SAMEA5611503)
TMP016234	Plate 01	P160078	UZ025427	MSA006AVN1	avian	w_avian	wildlife	MSA006	15/09/2015	MOWLEM = SAIKA	313	6	-1.256981667	36.90746667	yes	TMP016234	10	10	NA	0	0	0	0	0	0	0	0	15	0	0	0	0	0	0	0	0	birds other	NA	ERS3415713 (SAMEA5611524)
TMP016322	Plate 02	P160078	UZ025674	KAN009HUM2	human	human	human	KAN009	22/09/2015	KAREN	110	1	-1.313598333	36.68382833	no	TMP016322	10	10	NA	0	0	0	0	0	0	0	0	0	0	0	0	0	0	0	0	0	none	NA	ERS3415721 (SAMEA5611532)
TMP016456	Plate 02	P160078	UZ025398	KAN007ROD1	rodent	w_mammal	wildlife	KAN007	21/09/2015	KAREN	110	1	-1.360794419	36.71998186	yes	TMP016456	10	10	NA	0	6	0	0	0	0	0	0	0	0	0	0	2	0	0	0	0	ruminants birds other	NA	ERS3415739 (SAMEA5611550)
TMP016519	Plate 02	P160078	UZ025219	MSA004SUI4	pig	monogastric	livestock	MSA004	14/09/2015	MOWLEM = SAIKA	311	6	-1.245281667	36.92033333	yes	TMP016519	10	10	NA	0	5	0	0	0	7	4	0	20	0	0	0	0	0	0	0	0	ruminants monogastrics birds other	NA	ERS3415746 (SAMEA5611557)
TMP016924	Plate 01	P160078	UZ025823	HAR012HUM1	human	human	human	HAR012	07/10/2015	HARAMBEE	211	3	-1.282213333	36.88126167	no	TMP016924	10	10	NA	0	0	0	0	0	0	0	0	0	0	0	0	0	0	0	0	0	none	NA	ERS3415776 (SAMEA5611587)
TMP018398	Plate 04	P160305	UZ2004601	KYL026AV_POP1	av_pop	w_avian	wildlife	KYL026	24/11/2015	KAYOLE	313	6	-1.276371667	36.920625	yes	TMP018398	10	10	NA	0	0	0	0	0	14	0	0	40	0	0	0	0	0	0	0	0	monogastrics birds	NA	ERS3415798 (SAMEA5611609)
TMP019182	Plate 03	P160305	UZ026146	KIG019HUM3	human	human	human	KIG019	02/11/2015	KIRIGU	260	6	-1.291726667	36.70118333	yes	TMP019182	10	10	NA	0	0	16	0	0	2	0	0	5	0	0	0	0	0	0	0	0	ruminants monogastrics birds	NA	ERS3415841 (SAMEA5611652)
TMP019284	Plate 03	P160305	UZ026167	KIG019HUM6	human	human	human	KIG019	02/11/2015	KIRIGU	260	6	-1.291726667	36.70118333	yes	TMP019284	10	10	NA	0	0	16	0	0	2	0	0	5	0	0	0	0	0	0	0	0	ruminants monogastrics birds	NA	ERS3415853 (SAMEA5611664)
TMP019378	Plate 02	P160078	UZ026200	KIG019SUI1	pig	monogastric	livestock	KIG019	02/11/2015	KIRIGU	260	6	-1.291726667	36.70118333	yes	TMP019378	10	10	NA	0	0	16	0	0	2	0	0	5	0	0	0	0	0	0	0	0	ruminants monogastrics birds	NA	ERS3415867 (SAMEA5611678)
TMP019713	Plate 12	P160719	UZ026291	KIG021AVN8	avian	w_avian	wildlife	KIG021	03/11/2015	KIRIGU	260	6	-1.288618333	36.69824333	no	TMP019713	10	10	NA	0	0	0	0	0	0	0	0	0	0	0	0	0	0	0	0	0	none	NA	ERS3415905 (SAMEA5611716)
TMP019798	Plate 01	P160078	UZ026491	MLK023HUM6	human	human	human	MLK023	10/11/2015	MLANGO KUBWA	312	7	-1.264538333	36.85216167	yes	TMP019798	10	10	NA	0	26	2	0	4	0	0	0	0	0	0	0	0	0	0	0	0	ruminants	NA	ERS3415916 (SAMEA5611727)
TMP020758	Plate 10	P160554	UZ021989	KWG071ANA2	geese	poultry	livestock	KWG071	05/07/2016	KAWANGWARE	260	6	-1.280645	36.74687667	yes	TMP020758	10	10	NA	0	0	22	0	3	1	2	0	0	0	0	0	3	0	2	0	0	ruminants monogastrics birds	NA	ERS3415991 (SAMEA5611802)
TMP020812	Plate 13	P160720	UZ021939	KWG072HUM6	human	human	human	KWG072	11/07/2016	KAWANGWARE	260	6	-1.281778333	36.74369333	no	TMP020812	10	10	NA	0	0	0	0	0	0	0	0	0	0	0	0	0	0	0	0	0	none	NA	ERS3416000 (SAMEA5611811)
TMP020823	Plate 14	P160720	UZ021936	KWG072HUM2	human	human	human	KWG072	11/07/2016	KAWANGWARE	260	6	-1.281778333	36.74369333	no	TMP020823	10	10	NA	0	0	0	0	0	0	0	0	0	0	0	0	0	0	0	0	0	none	NA	ERS3416002 (SAMEA5611813)
TMP021061	Plate 14	P160720	UZ022092	GTN074OVN1	sheep	ruminant	livestock	GTN074	13/07/2016	GATINA	260	6	-1.291341667	36.75221	yes	TMP021061	10	10	NA	0	0	0	0	3	0	0	0	7	0	0	0	0	0	0	0	0	ruminants birds	NA	ERS3416038 (SAMEA5611849)
TMP021066	Plate 14	P160720	UZ022325	GTN074GAL2	chickens	poultry	livestock	GTN074	13/07/2016	GATINA	260	6	-1.291341667	36.75221	yes	TMP021066	10	10	NA	0	0	0	0	3	0	0	0	7	0	0	0	0	0	0	0	0	ruminants birds	NA	ERS3416039 (SAMEA5611850)
TMP021101	Plate 21	P170066	UZ027334	GTN074ROD3	rodent	w_mammal	wildlife	GTN074	13/07/2016	GATINA	260	6	-1.291341667	36.75221	yes	TMP021101	10	10	NA	0	0	0	0	3	0	0	0	7	0	0	0	0	0	0	0	0	ruminants birds	NA	ERS3416045 (SAMEA5611856)
TMP021196	Plate 21	P170066	UZ035014	GWK076AVN7	avian	w_avian	wildlife	GWK076	19/07/2016	GATWIKIRA	312	7	-1.31708	36.77864167	yes	TMP021196	10	10	NA	0	0	0	0	0	20	0	0	0	0	16	0	0	0	0	0	0	monogastrics birds	NA	ERS3416057 (SAMEA5611868)
TMP021570	Plate 16	P160810	UZ028320	LUM053GAL5	chickens	poultry	livestock	LUM053	12/04/2016	LUMUMBA (JERICHO)	220	6	-1.292383333	36.87426	yes	TMP021570	10	10	NA	0	0	0	0	0	0	0	0	15	0	0	0	0	0	0	0	0	birds	NA	ERS3416084 (SAMEA5611895)
TMP021637	Plate 12	P160719	UZ028198	KHW050ANA4	geese	poultry	livestock	KHW050	06/04/2016	KAHAWA WEST / JUJA K	311	6	-1.179393235	36.90742073	yes	TMP021637	10	10	NA	0	0	4	11	0	0	0	0	20	0	0	0	14	4	5	0	0	ruminants birds	NA	ERS3416088 (SAMEA5611899)
TMP021939	Plate 17	P160773	UZ028010	STC047HUM2	human	human	human	STC047	22/03/2016	SOUTH C	211	3	-1.325503333	36.82077667	yes	TMP021939	10	10	NA	0	0	0	0	0	0	0	0	6	0	0	0	0	0	0	0	0	birds	NA	ERS3416104 (SAMEA5611915)
TMP022099	Plate 12	P160719	UZ027965	STC046GAL2	chickens	poultry	livestock	STC046	22/03/2016	SOUTH C	211	3	-1.325046667	36.81989167	yes	TMP022099	10	10	NA	0	0	0	0	0	0	0	0	9	0	0	0	0	0	0	0	0	birds	NA	ERS3416109 (SAMEA5611921)
TMP022110	Plate 09	P160554	UZ027379	EAS044ROD3	rodent	w_mammal	wildlife	EAS044	15/03/2016	EASTLEIGH NORTH	330	5	-1.268461667	36.84851	yes	TMP022110	10	10	NA	0	0	5	0	0	0	0	0	0	0	0	0	0	0	2	0	0	ruminants birds	NA	ERS3416110 (SAMEA5611922)
TMP022507	Plate 21	P170066	UZ022052	GTN074AVN4	avian	w_avian	wildlife	GTN074	13/07/2016	GATINA	260	6	-1.291341667	36.75221	yes	TMP022507	10	10	NA	0	0	0	0	3	0	0	0	7	0	0	0	0	0	0	0	0	ruminants birds	NA	ERS3416118 (SAMEA5611930)
TMP022790	Plate 16	P160810	UZ030074	NGN080HUM2	human	human	human	NGN080	09/08/2016	NGUNDU	270	5	-1.27306	37.05743667	yes	TMP022790	10	10	NA	0	0	4	0	3	0	0	0	115	0	0	4	0	0	0	0	0	ruminants birds	NA	ERS3416125 (SAMEA5611937)
TMP023954	Plate 19	P160812	UZ030910	LOR097NUM5	guinea_fowl	poultry	livestock	LOR097	27/09/2016	LORESHO	110	1	-1.247168333	36.764595	yes	TMP023954	10	10	NA	0	0	0	0	0	0	0	0	13	0	0	0	0	16	0	0	0	birds	NA	ERS3416165 (SAMEA5611977)
TMP023989	Plate 19	P160812	UZ030909	LOR097NUM6	guinea_fowl	poultry	livestock	LOR097	27/09/2016	LORESHO	110	1	-1.247168333	36.764595	yes	TMP023989	10	10	NA	0	0	0	0	0	0	0	0	13	0	0	0	0	16	0	0	0	birds	NA	ERS3416171 (SAMEA5611983)
TMP023994	Plate 19	P160812	UZ031044	LOR097NUM3	guinea_fowl	poultry	livestock	LOR097	27/09/2016	LORESHO	110	1	-1.247168333	36.764595	yes	TMP023994	10	10	NA	0	0	0	0	0	0	0	0	13	0	0	0	0	16	0	0	0	birds	NA	ERS3416172 (SAMEA5611984)
TMP024018	Plate 19	P160812	UZ031028	LOR097HUM4	human	human	human	LOR097	27/09/2016	LORESHO	110	1	-1.247168333	36.764595	yes	TMP024018	10	10	NA	0	0	0	0	0	0	0	0	13	0	0	0	0	16	0	0	0	birds	NA	ERS3416176 (SAMEA5611988)
TMP024048	Plate 18	P160773	UZ031023	LOR097HUM3	human	human	human	LOR097	27/09/2016	LORESHO	110	1	-1.247168333	36.764595	yes	TMP024048	10	10	NA	0	0	0	0	0	0	0	0	13	0	0	0	0	16	0	0	0	birds	NA	ERS3416181 (SAMEA5611993)
TMP024547	Plate 18	P160773	UZ031037	LOR097GAL6	chickens	poultry	livestock	LOR097	27/09/2016	LORESHO	110	1	-1.247168333	36.764595	yes	TMP024547	10	10	NA	0	0	0	0	0	0	0	0	13	0	0	0	0	16	0	0	0	birds	NA	ERS3416222 (SAMEA5612034)
TWAG00168	Plate 08	P160553	UZ029251	MIH067HUM1	human	human	human	MIH067	07/06/2016	MIHANGO	270	5	-1.273335	36.944275	yes	TWAG00168	10	10	NA	0	3	0	0	0	0	0	0	30	0	0	0	0	11	0	0	0	ruminants birds	NA	ERS3416224 (SAMEA5612036)
INT003724	Plate 15	P160810	UZ027275	KRR039GAL1	chickens	poultry	livestock	KRR039	22/02/2016	KARURA	120	2	-1.224276667	36.82658833	yes	INT003724	351*	-675	Yes	0	0	0	0	0	0	0	0	0	0	700	0	0	0	0	0	0	birds	NA	ERS3415037 (SAMEA5610847)
TMP019291	Plate 03	P160305	UZ026194	KIG019HUM1	human	human	human	KIG019	02/11/2015	KIRIGU	260	6	-1.291726667	36.70118333	yes	TMP019291	Novel	-962	Yes	0	0	16	0	0	2	0	0	5	0	0	0	0	0	0	0	0	ruminants monogastrics birds	NA	ERS3415854 (SAMEA5611665)
