# Supplementary material for: Landscape genomics of Escherichia coli in livestock-keeping households across a rapidly developing urban city
Source: Research Square preprint supplement (doi:10.21203/rs.3.rs-172737/v1), 2021-02-26
Supplement: Supplementary file 5 [file 5789b13c1a01cb51cf09ebe1.docx]

Urban Zoo papers

Murungi, M.K., Muloi, D.M., Muinde, P., Githigia, S., Akoko, J.M., **Fèvre, E.M**., Rushton, J. and Alarcon, P. (2021). The Nairobi pork value chain: mapping and assessment of governance, challenges, and food safety issues. *Frontiers in Veterinary Science*. 8:581376. <https://doi.org/10.3389/fvets.2021.581376>

Hassell, J.M., Bettridge, J.M., Ward, M.J., Ogendo, A., Imboma, T., Muloi, D., Fava, F., Robinson, T.P., Begon, M., **Fèvre, E.M.** (2020). Socio‐ecological drivers of vertebrate biodiversity and human‐animal interfaces across an urban landscape. *Global Change Biology*. <http://dx.doi.org/10.1111/gcb.15412>

Hassell, J.M., Zimmerman, D., **Fèvre, E.M.,** Zinsstag, J., Bukachi, S., Barry, M., Muturi, M., Bett, B., Jensen, N., Ali, S., Maples, S., Rushton, J., Tschopp, R., Madaine, Y.O., Abtidon, R.A., Wild, H. (2020). Africa’s nomadic pastoralists and their animals are an invisible frontier in pandemic surveillance. *American Journal of Tropical Medicine and Hygiene*. <https://doi.org/10.4269/ajtmh.20-1004>

Kiambi, S.G., Onono, J.O., Kang’ethe, E., Aboge, G.O., Murungi, M.K., Muinde, P., Akoko, J., Momanyi, K., Rusthon, J., **Fèvre, E.M.**, Alarcon, P.L. (2020). Investigation of the governance structure of Nairobi dairy value chain and its influence on food safety. *Preventative Veterinary Medicine*. 179, 105009. <https://doi.org/10.1016/j.prevetmed.2020.105009>

Akoko, J., Pelle, R., Kivali, V., Schelling, E., Shirima, G., Machuka, E.M., Mathew, C., **Fèvre, E.M.**, Kyallo, V., Falzon, L.C., Lukambagire, A.S., Halliday, J.E.B., Bonfoh, B., Kazwala, R., Ouma, C., 2020. Serological and molecular evidence of *Brucella* species in the rapidly growing pig sector in Kenya. *BMC Veterinary Research*, 16, 133. <https://doi.org/10.1186/s12917-020-02346-y>

Ahmed, S., Dávila, J.D., Allen, A., Haklay, M.M., Tacoli, C. and **Fèvre, E.M.** (2019). Does urbanization make emergence of zoonosis more likely? – Evidence, myths and gaps. *Environment and Urbanisation*. 31(2), pp. 443-460. <https://doi.org/10.1177/0956247819866124>

Muloi, D., Kiiru, J., Ward, M.J., Hassell, J.M., Bettridge, J., Robinson, T.P., van Bunnik, B., Chase-Topping, M., Robertson, G., Pedersen, A.B., **Fèvre, E.M.**, Woolhouse, MEJ., Kang’ethe, E. and Kariuki, S. (2019). Epidemiology of antimicrobial resistant *Escherichia coli* carriage in sympatric humans and livestock in a rapidly urbanising city. *International Journal of Antimicrobial Agents*, 54(5), pp. 531-537. <https://doi.org/10.1016/j.ijantimicag.2019.08.014>

Muloi, D., **Fèvre, E.M.**, Bettdige, J., Rono, R., Ong’are, D., Hassell, J.M., Karani, M.K., Muinde, P., van Bunnik, B., Street, A., Chase-Topping, M., Pedersen, A.B., Ward, M.J., and Woolhouse, MEJ. (2019). A cross-sectional survey of practices and knowledge among antibiotic retailers in Nairobi, Kenya. *Journal of Global Health*. 9:2. <https://dx.doi.org/10.7189/jogh.09.020412>

Ahmed, S., Haklay, M., Tacoli, C., Githiri, G., Davila, J.D., Allen, A., **Fèvre, E.M.** (2019). Participatory mapping and food‐centred justice in informal settlements in Nairobi, Kenya. *Geo: Geography and Environment*. 2019;e00077. <https://dx.doi.org/10.1002/geo2.77>

Hassell, J.M., Ward, M.J., Muloi, D., Bettridge, J.M., Robinson, T.P., Kariuki, S., Ogendo, A., Kirru, J., Imboma, T., Kang’ethe, E., Öghren, E.M., Williams, N.J., Begon, M., Woolhouse, M.E.J. and **Fèvre, E.M.** (2019). Epidemiology of Clinically Relevant Antimicrobial Resistance at the Wildlife-Livestock-Human Interface in Nairobi. *Lancet Planetary Health* 3(6): e259-e269 [https://dx.doi.org/10.1016/S2542-5196(19)30083-X](https://dx.doi.org/10.1016/S2542-5196%2819%2930083-X)

Hassell, J.M., Ward, M.J., Muloi, D., Bettridge, J.M., Robinson, T.P., Ogendo, A., Imboma, T., Kiiru, J., Kariuki, S., Begon, M., Kang’ethe, E.K., Woolhouse, M.E.J., **Fèvre, E.M.** (2019). Deterministic Processes Structure Bacterial Genetic Communities across an Urban Landscape. *Nature Communications*,10:2643. <http://dx.doi.org/10.1038/s41467-019-10595-1>

Akoko, J.M., MacLeod, E., Thomas, L.F., Alarcon, P., Kang’ethe, E., Kivali, V., Muloi, D., Muinde, P., Murungi, M.K., Gachoya, J.M. and **Fèvre, E.M.** (2019). Detection of circulating antigens for Taenia spp. in pigs slaughtered for consumption in Nairobi and surroundings, Kenya. *Parasite Epidemiology and Control*, e00093. <https://doi.org/10.1016/j.parepi.2019.e00093>

Muloi, D., Alarcon, P., Ombui, J., Ngeiywa, K.J., Abdullahi, B., Muinde, P., Karani, M.K., Rushton, J. and **Fèvre, E.M. (**2018). Value chain analysis and sanitary risks of the camel milk system supplying Nairobi city, Kenya. *Preventive Veterinary Medicine*. 159: 203-210 <https://doi.org/10.1016/j.prevetmed.2018.09.010>

Kiambi, S., Alarcon, P., Rushton, J., Murungi, M.K., Muinde, P., Akoko, J., Aboge, G., Gikonyo, S., Momanyi, K., Kang’ethe, E.K. and **Fèvre, E.M.** (2018). Mapping Nairobi’s dairy food system: An essential analysis for policy, industry and research. *Agricultural Systems*, 167, 47–60. <https://doi.org/10.1016/j.agsy.2018.08.007>

Carron, M., Chang, Yu-Mei, Momanyi, K., Akoko, J., Kiiru, J., Bettridge, J., Chaloner, G., Rushton, J., O’Brien, S., Williams, N., **Fèvre, E.M.** and Häsler, B. (2018). Campylobacter, a zoonotic pathogen of global importance: prevalence and risk factors in the fast-evolving chicken meat system of Nairobi, Kenya. *PLoS Neglected Tropical Diseases*. <https://doi.org/10.1371/journal.pntd.0006658>

Muloi. D., Ward, M., Pedersen, A.B., **Fèvre, E.M.**, Woolhouse, M.E.J., and van Bunnik, B.A.D. (2018). Are food animals responsible for transfer of antimicrobial resistant Escherichia coli or their resistance determinants to human populations? A systematic review. *Foodborne Pathogens and Disease*, 15(8): 467-474. <https://doi.org/10.1089/fpd.2017.2411>

Onono, J.O., Alarcon, P., Karani, M., Muinde, P., Akoko, J.M., Carron, M., **Fèvre, E.M.**, Häsler, B. and Rushton, J. (2018). Identification of production challenges and benefits using value chain mapping of egg food systems in Nairobi, Kenya. *Agricultural Systems*, 159, pp 1-8. <http://dx.doi.org/10.1016/j.agsy.2017.10.001>

Alarcon, P., **Fèvre, E.M**., Muinde, P., Murungi, M.K., Kiambi, S., Akoko, J., Rushton, J. (2017). Urban livestock keeping in the city of Nairobi: Diversity of production systems, supply chains and their disease management and risks. *Frontiers in Veterinary Research*, 4, pp. 171. <http://dx.doi.org/10.3389/fvets.2017.00171>

Carron, M., Alarcon-Lopez, P., Karani, M., Muinde, P., Akoko, J., Onono, J., **Fèvre, E.M.**, Haesler, B. and Rushton, J. (2017). The broiler meat system in Nairobi, Kenya: using a value chain framework to understand animal and product flows, governance and sanitary risks. *Preventive Veterinary Medicine*. 147, pp. 90-99. <https://doi.org/10.1016/j.prevetmed.2017.08.013>

Alarcon, P., **Fèvre, E.M.**, Murungi, M.K., Muinde, P., Akoko, J., Dominguez-Salas, P., Kiambi, S., Ahmed, S., Häsler, B., Rushton, J. (2017). Mapping of beef, sheep and goat food systems in Nairobi - a framework for policy making and the identification of structural vulnerabilities and deficiencies. *Agricultural Systems*. 152;1-17 <http://dx.doi.org/10.1016/j.agsy.2016.12.005>

Cornelsen, L., Alarcon, P., Häsler, B., Amendah, D.D., Ferguson, E., **Fèvre, E.M.**, Grace, D., Dominguez-Salas, P., Rushton, J.R. (2016). Cross-sectional study of drivers of animal-source food consumption in low-income urban areas of Nairobi, Kenya. *BMC Nutrition*. 2:70. <http://dx.doi.org/10.1186/s40795-016-0109-z>

Hassell, J.M., Begon, M., Ward, M.J. and **Fèvre, E.M.** (2017). Urbanisation and disease emergence: dynamics at the wildlife-livestock-human interface. *Trends in Ecology and Evolution*. 32(1), pp. 55-67. <http://dx.doi.org/10.1016/j.tree.2016.09.012>

Robinson, T.P., Bub, D.P., Carrique-Mas, J., **Fèvre, E.M**., Gilbert, M., Grace, D., Hay, S.I., Jiwakanoni, J., Kakkar, M., Kariuki, S.,Laxminarayan, R., Lubroth, J., Magnussonn, U., Thi Ngoco, P., Van Boeck, T.P., and Woolhouse, M.E.J. (2016). Antibiotic resistance: Mitigation opportunities in livestock sector development. *Animal*. 11(1): 1-3 <http://dx.doi.org/10.1017/S1751731116001828>

Dominguez-Salas, P., Alarcon, P. Häsler, B., Dohoo, I.R., Colverson, K., Kimani-Murage, E.W., Alonso, S., Ferguson, E., **Fèvre, E.M.**, Rushton, J., Grace, D. (2016). Nutritional characterisation of low-income households of Nairobi: socioeconomic, livestock and gender considerations and predictors of malnutrition from a cross-sectional survey. *BMC Nutrition*, 2:47 <http://dx.doi.org/10.1186/s40795-016-0086-2>

Robinson, T.P., Bub, D.P., Carrique-Mas, J., **Fèvre, E.M.**, Gilbert, M., Grace, D., Hay, S.I., Jiwakanoni, J., Kakkar, M., Kariuki, S.,Laxminarayan, R., Lubroth, J., Magnussonn, U., Thi Ngoco, P., Van Boeck, T.P., and Woolhouse, M.E.J. (2016). Antibiotic resistance is the quintessential One Health issue. *Transactions of Royal Society of Tropical Medicine and Hygiene*, 110(7): 377-380 <http://dx.doi.org/10.1093/trstmh/trw048>
